# Supplementary material
Source: PubMed Central journal article supplement (PMC6397078)

## Region Plots for 139 novel signals of association with lung function

The region plots are from the meta-analysis of UK Biobank and SpiroMeta, from which the effect sizes and standard errors were used to calculate the 99% credible sets. The variants in the 99% credible set are shown as filled circles. The green bar indicates the extent of the credible set. The red line is  $P = 5 \times 10^{-9}$ , used as our discovery threshold in UK Biobank and the meta-analysis.

### Contents

|                                                              |    |
|--------------------------------------------------------------|----|
| <i>PHF13</i> , <b>FEV1/FVC</b> tier 1 rs9661802.....         | 5  |
| <i>MIR4418</i> , <b>FEV1</b> tier 1 rs12737805.....          | 5  |
| <i>DHDDS</i> , <b>FVC</b> tier 2 rs9438626.....              | 6  |
| <i>DHDDS</i> , <b>FEV1</b> tier 1 rs12096239.....            | 6  |
| <i>FAF1</i> , <b>FEV1/FVC</b> tier 1 rs1416685.....          | 7  |
| <i>LOC101926964</i> , <b>FEV1/FVC</b> tier 1 rs72673461..... | 7  |
| <i>NEXN</i> , <b>FEV1/FVC</b> tier 1 rs9661687.....          | 8  |
| <i>TGFBR3</i> , <b>FEV1/FVC</b> tier 1 rs10874851.....       | 8  |
| <i>DENND2D</i> , <b>FEV1/FVC</b> tier 1 rs9970286.....       | 9  |
| <i>C1orf54</i> , <b>PEF</b> tier 1 rs11205354.....           | 9  |
| <i>KRTCAP2</i> , <b>FEV1/FVC</b> tier 1 rs141942982.....     | 10 |
| <i>RALGPS2</i> , <b>FEV1</b> tier 1 rs4651005.....           | 10 |
| <i>MIR548F1</i> , <b>FVC</b> tier 1 rs2146098.....           | 11 |
| <i>MIR548F1</i> , <b>FEV1/FVC</b> tier 1 rs17531405.....     | 11 |
| <i>MIR181A1HG</i> , <b>FEV1/FVC</b> tier 1 rs10919604.....   | 12 |
| <i>LMOD1</i> , <b>FEV1/FVC</b> tier 2 rs4309038.....         | 12 |
| <i>TGFB2</i> , <b>FEV1/FVC</b> tier 1 rs2799098.....         | 13 |
| <i>LYPLAL1</i> , <b>FEV1/FVC</b> tier 1 rs75128958.....      | 13 |
| <i>HLX</i> , <b>FVC</b> tier 1 rs17009288.....               | 14 |
| <i>LOC101926966</i> , <b>FEV1/FVC</b> tier 1 rs2544536.....  | 14 |
| <i>RDH14</i> , <b>FVC</b> tier 1 rs6751968.....              | 15 |
| <i>RDH14</i> , <b>FVC</b> tier 1 rs13430465.....             | 15 |
| <i>ATAD2B</i> , <b>FVC</b> tier 2 rs13009582.....            | 16 |
| <i>CIB4</i> , <b>FVC</b> tier 2 rs732990.....                | 16 |
| <i>PKDCC</i> , <b>FVC</b> tier 1 rs4952564.....              | 17 |
| <i>IL1RL1</i> , <b>FEV1/FVC</b> tier 1 rs12470864.....       | 17 |
| <i>TEX41</i> , <b>FEV1/FVC</b> tier 1 rs1406225.....         | 18 |
| <i>RBMS1</i> , <b>FEV1</b> tier 1 rs7424771.....             | 18 |
| <i>MIR548N</i> , <b>FEV1</b> tier 2 rs2304340.....           | 19 |
| <i>ITGAV</i> , <b>FEV1/FVC</b> tier 1 rs2084448.....         | 19 |

|                                                      |    |
|------------------------------------------------------|----|
| <i>SATB2, FVC</i> tier 1 rs1249096 .....             | 20 |
| <i>SPATS2L, FEV1/FVC</i> tier 2 rs985256.....        | 20 |
| <i>KIAA2012, FVC</i> tier 2 rs12997625.....          | 21 |
| <i>IGFBP5, FEV1/FVC</i> tier 1 rs6435952 .....       | 21 |
| <i>DIRC3, FEV1</i> tier 2 rs4294980.....             | 22 |
| <i>ASIC4, FVC</i> tier 2 rs4674407.....              | 22 |
| <i>LINC01107, FVC</i> tier 2 rs6431620.....          | 23 |
| <i>C2orf54, FVC</i> tier 1 rs6437219 .....           | 23 |
| <i>BOK-AS1, FVC</i> tier 1 rs6733504.....            | 24 |
| <i>LINC00620, FEV1</i> tier 2 rs2974389 .....        | 24 |
| <i>RARB, FVC</i> tier 2 rs73048404 .....             | 25 |
| <i>FOXP1, FVC</i> tier 1 rs35480566 .....            | 25 |
| <i>PDZRN3-AS1, FEV1/FVC</i> tier 1 rs586936.....     | 26 |
| <i>MIR548G, FVC</i> tier 1 rs1610265.....            | 26 |
| <i>BCHE, FEV1/FVC</i> tier 1 rs1799807.....          | 27 |
| <i>IGF2BP2, FEV1</i> tier 1 rs6780171 .....          | 27 |
| <i>KDR, FEV1</i> tier 2 rs12331869.....              | 28 |
| <i>BTC, FEV1/FVC</i> tier 1 rs62316310 .....         | 28 |
| <i>FRAS1, FEV1/FVC</i> tier 1 rs11098196 .....       | 29 |
| <i>HHIP-AS1, FVC</i> tier 1 rs13109426.....          | 29 |
| <i>HHIP-AS1, PEF</i> tier 1 rs13116999.....          | 30 |
| <i>LOC100996325, FEV1</i> tier 1 rs11739847 .....    | 30 |
| <i>NNT, FEV1</i> tier 1 rs4866846 .....              | 31 |
| <i>LOX, FEV1/FVC</i> tier 1 rs10059661 .....         | 31 |
| <i>ADAMTS19-AS1, FEV1/FVC</i> tier 1 rs17163397..... | 32 |
| <i>ADRB2, FEV1</i> tier 1 rs1800888 .....            | 32 |
| <i>FGF18, FEV1/FVC</i> tier 1 rs10059996 .....       | 33 |
| <i>RASGEF1C, FEV1/FVC</i> tier 1 rs79898473 .....    | 33 |
| <i>BMP6, FVC</i> tier 1 rs12198986.....              | 34 |
| <i>HMGA1, FVC</i> tier 1 rs9689096 .....             | 34 |
| <i>CDC5L, FVC</i> tier 2 rs9357446 .....             | 35 |
| <i>RUNX2, FEV1/FVC</i> tier 1 rs12202314 .....       | 35 |
| <i>RUNX2, FVC</i> tier 2 rs9472541 .....             | 36 |
| <i>RNU6-71P, FEV1</i> tier 1 rs2894837.....          | 36 |
| <i>SLC2A12, FEV1</i> tier 2 rs2627237.....           | 37 |
| <i>LOC100507477, FEV1</i> tier 1 rs1102077.....      | 37 |
| <i>VTA1, FEV1</i> tier 1 rs9385988.....              | 38 |
| <i>MEOX2-AS1, FEV1/FVC</i> tier 1 rs4721457 .....    | 38 |

|                                                    |    |
|----------------------------------------------------|----|
| <i>SKAP2, FEV1</i> tier 1 rs559233 .....           | 39 |
| <i>HOXA-AS3, FVC</i> tier 2 rs62454414 .....       | 39 |
| <i>JAZF1, FEV1</i> tier 1 rs1513272 .....          | 40 |
| <i>IGFBP3, FVC</i> tier 1 rs17232687 .....         | 40 |
| <i>SEMA3D, FEV1</i> tier 1 rs12707691 .....        | 41 |
| <i>MET, FEV1/FVC</i> tier 2 rs193686 .....         | 41 |
| <i>PPP1R3B, FEV1/FVC</i> tier 1 rs330939 .....     | 42 |
| <i>DEFB136, FEV1</i> tier 2 rs4128298 .....        | 42 |
| <i>LOC100505739, FEV1</i> tier 1 rs7465401 .....   | 43 |
| <i>BOP1, FVC</i> tier 1 rs7838717 .....            | 43 |
| <i>SH3GL2, FEV1</i> tier 1 rs7041139 .....         | 44 |
| <i>LOC158434, FEV1/FVC</i> tier 1 rs72743974 ..... | 44 |
| <i>GALNT12, FEV1/FVC</i> tier 1 rs57649467 .....   | 45 |
| <i>IER5L, FEV1</i> tier 2 rs967497 .....           | 45 |
| <i>PARD3, FEV1/FVC</i> tier 1 rs1274475 .....      | 46 |
| <i>CAMK2G, PEF</i> tier 2 rs60820984 .....         | 46 |
| <i>OBFC1, FEV1</i> tier 1 rs11191841 .....         | 47 |
| <i>SLC1A2, FEV1/FVC</i> tier 2 rs10836366 .....    | 47 |
| <i>FKBP4, FVC</i> tier 1 rs56196860 .....          | 48 |
| <i>CCND2-AS1, FEV1</i> tier 2 rs12811814 .....     | 48 |
| <i>AEBP2, FEV1/FVC</i> tier 1 rs10841302 .....     | 49 |
| <i>RASSF3, FEV1/FVC</i> tier 2 rs1244869 .....     | 49 |
| <i>MIR6074, FEV1</i> tier 1 rs11176001 .....       | 50 |
| <i>IGF1, PEF</i> tier 1 rs972936 .....             | 50 |
| <i>TBX5, FEV1</i> tier 1 rs2701110 .....           | 51 |
| <i>MIR8079, FEV1/FVC</i> tier 1 rs9533803 .....    | 51 |
| <i>DLEU1, FEV1</i> tier 1 rs2812208 .....          | 52 |
| <i>LINC00348, FVC</i> tier 1 rs803765 .....        | 52 |
| <i>LINC00382, FEV1</i> tier 1 rs4885681 .....      | 53 |
| <i>DOCK9, FEV1/FVC</i> tier 1 rs11620380 .....     | 53 |
| <i>MYO16, FEV1/FVC</i> tier 1 rs9634470 .....      | 54 |
| <i>HAUS4, FEV1/FVC</i> tier 1 rs1951121 .....      | 54 |
| <i>MIR5580, FEV1/FVC</i> tier 1 rs74053129 .....   | 55 |
| <i>VRTN, FVC</i> tier 1 rs10141786 .....           | 55 |
| <i>BMF, FVC</i> tier 1 rs34245505 .....            | 56 |
| <i>IVD, FEV1</i> tier 2 rs2304645 .....            | 56 |
| <i>CHAC1, FVC</i> tier 1 rs4924525 .....           | 57 |
| <i>COPS2, FEV1/FVC</i> tier 1 rs79234094 .....     | 57 |

|                                                    |    |
|----------------------------------------------------|----|
| <i>FAM227B, FEV1/FVC</i> tier 1 rs35251997.....    | 58 |
| <i>USP3, FEV1/FVC</i> tier 1 rs62012772.....       | 58 |
| <i>REC114, FEV1/FVC</i> tier 2 rs7176074.....      | 59 |
| <i>CLUAP1, FVC</i> tier 1 rs3751837.....           | 59 |
| <i>GLIS2-AS1, FEV1/FVC</i> tier 1 rs56104880.....  | 60 |
| <i>GRIN2A, FVC</i> tier 2 rs11074547.....          | 60 |
| <i>PAPD5, FVC</i> tier 1 rs76219171.....           | 61 |
| <i>FTO, FEV1/FVC</i> tier 1 rs35420030.....        | 61 |
| <i>LINC00917, FEV1/FVC</i> tier 1 rs12918140.....  | 62 |
| <i>MTHFSD, FEV1</i> tier 2 rs6539952.....          | 62 |
| <i>ATP2A3, FEV1/FVC</i> tier 1 rs8082036.....      | 63 |
| <i>PITPNM3, FEV1</i> tier 2 rs4796334.....         | 63 |
| <i>CLDN7, FVC</i> tier 2 rs1215.....               | 64 |
| <i>TNFSF12-TNFSF13, FEV1</i> tier 2 rs4968200..... | 64 |
| <i>NCOR1, FVC</i> tier 2 rs34351630.....           | 65 |
| <i>LOC101927166, FVC</i> tier 2 rs12945803.....    | 65 |
| <i>ANKFN1, FVC</i> tier 1 rs28519449.....          | 66 |
| <i>BCAS3, FEV1/FVC</i> tier 1 rs8068952.....       | 66 |
| <i>DDX5, FVC</i> tier 2 rs77672322.....            | 67 |
| <i>SMURF2, FEV1/FVC</i> tier 1 rs11653958.....     | 67 |
| <i>CASC17, FEV1/FVC</i> tier 1 rs996865.....       | 68 |
| <i>ASPSCR1, FVC</i> tier 1 rs59606152.....         | 68 |
| <i>VAPA, FEV1/FVC</i> tier 1 rs8089099.....        | 69 |
| <i>GATA6, FEV1/FVC</i> tier 2 rs1985511.....       | 69 |
| <i>C18orf8, FVC</i> tier 1 rs303752.....           | 70 |
| <i>LOC729950, FVC</i> tier 1 rs1668091.....        | 70 |
| <i>SLC14A2, FEV1</i> tier 1 rs9807668.....         | 71 |
| <i>LOC101927273, FVC</i> tier 2 rs2202572.....     | 71 |
| <i>QTRT1, FEV1</i> tier 2 rs11085744.....          | 72 |
| <i>ZFP82, FVC</i> tier 2 rs2967516.....            | 72 |
| <i>LOC101929395, FEV1</i> tier 2 rs6032942.....    | 73 |
| <i>LINC00649, FEV1/FVC</i> tier 1 rs12627254.....  | 73 |
| <i>PPP6R2, FEV1</i> tier 2 rs113111175.....        | 74 |

**PHF13, FEV<sub>1</sub>/FVC tier 1 rs9661802**

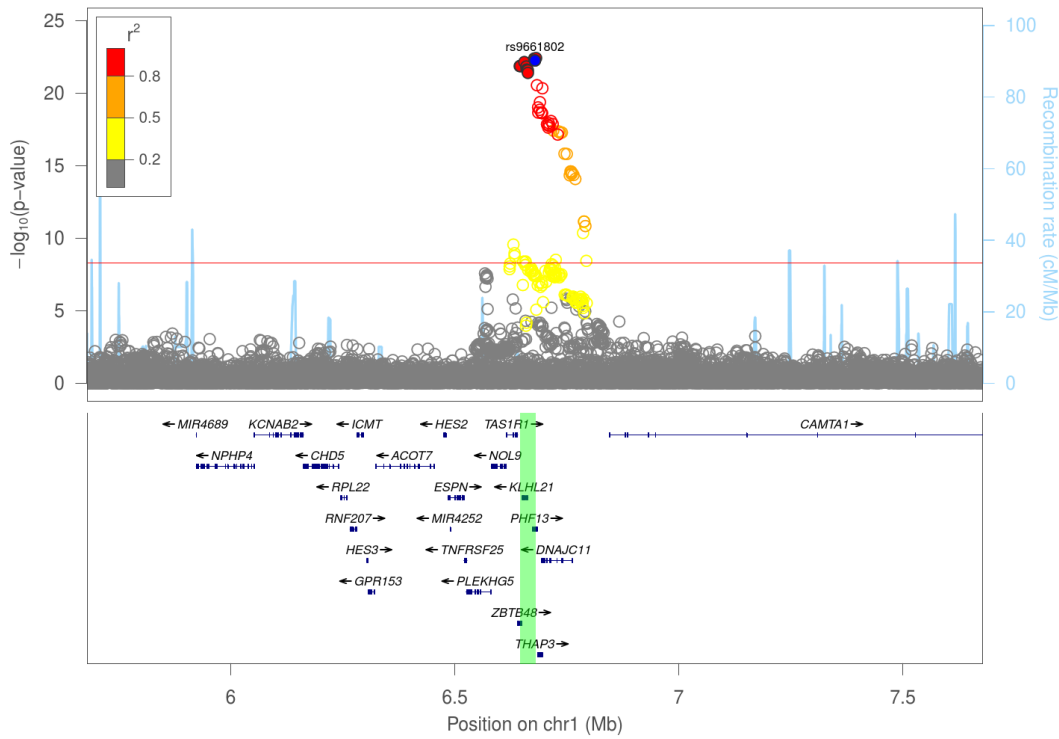

**MIR4418, FEV<sub>1</sub> tier 1 rs12737805**

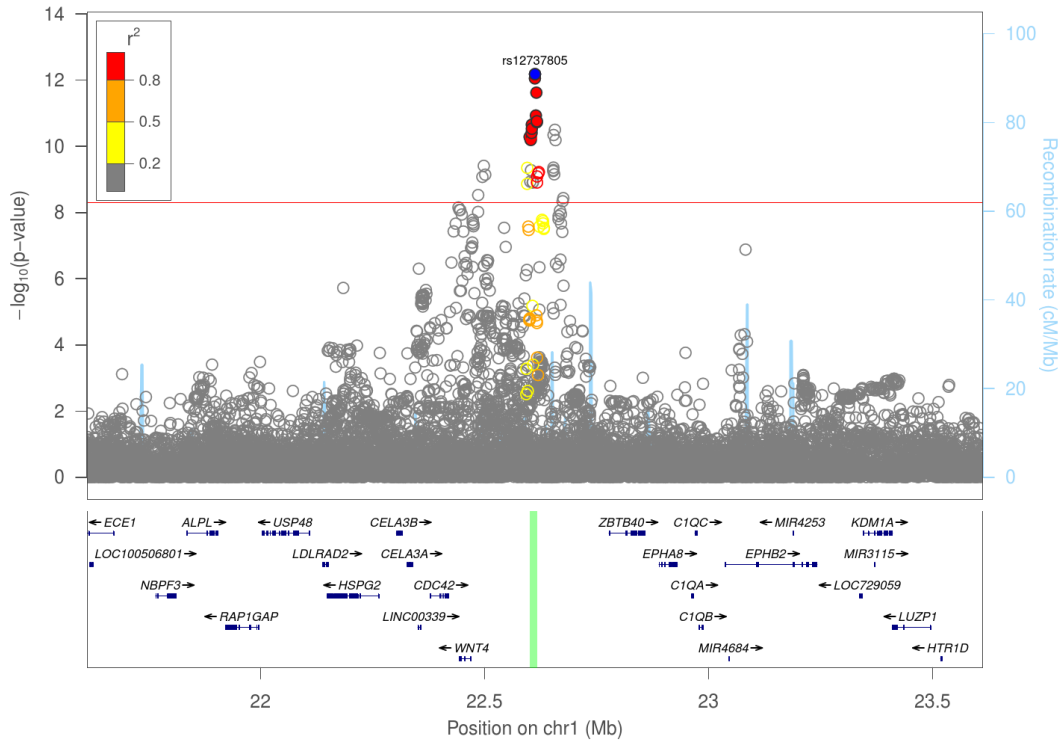

**DHDDS, FVC tier 2 rs9438626**

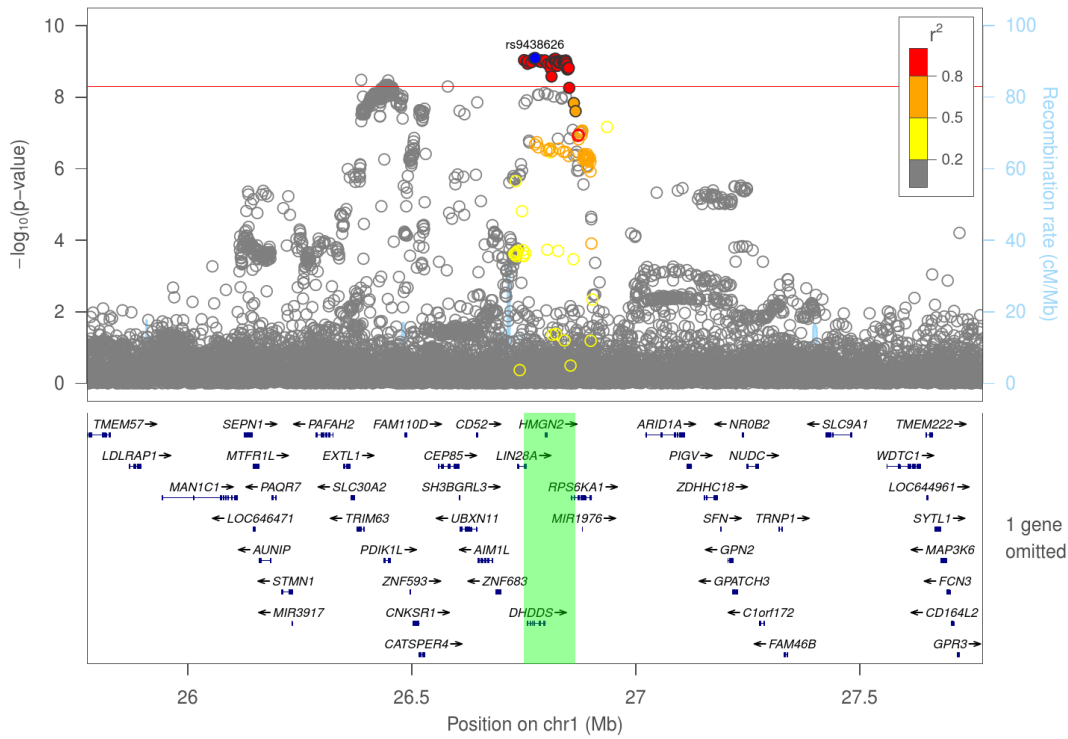

**DHDDS, FEV<sub>1</sub> tier 1 rs12096239**

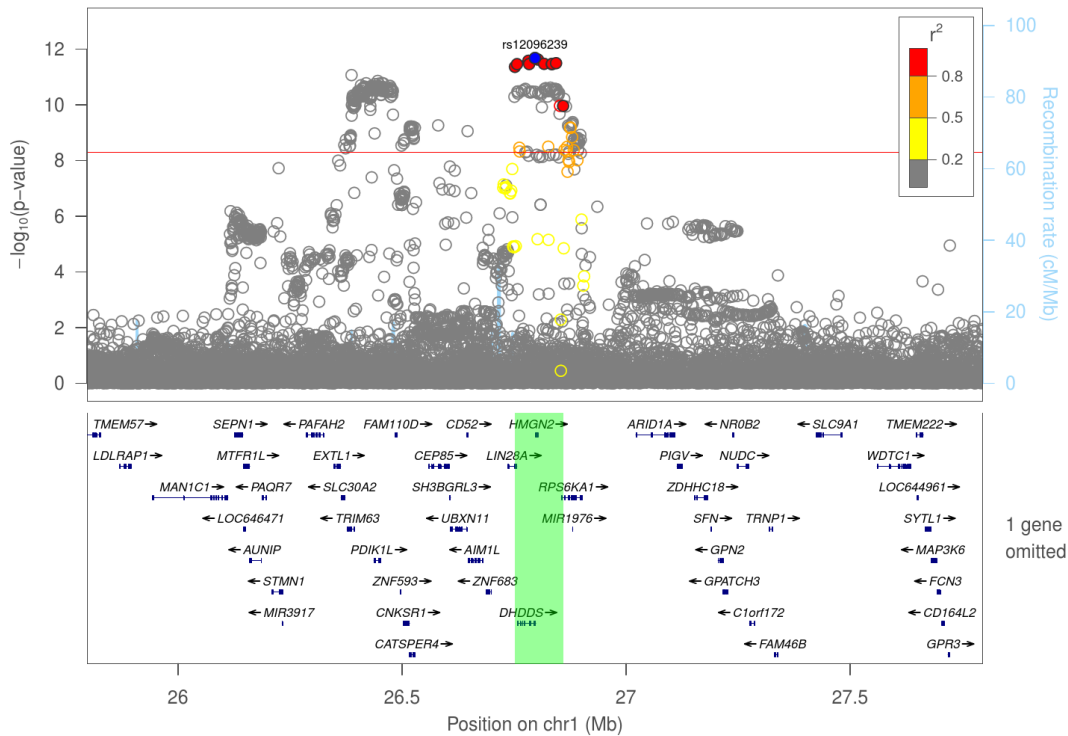

**FAF1, FEV<sub>1</sub>/FVC tier 1 rs1416685**

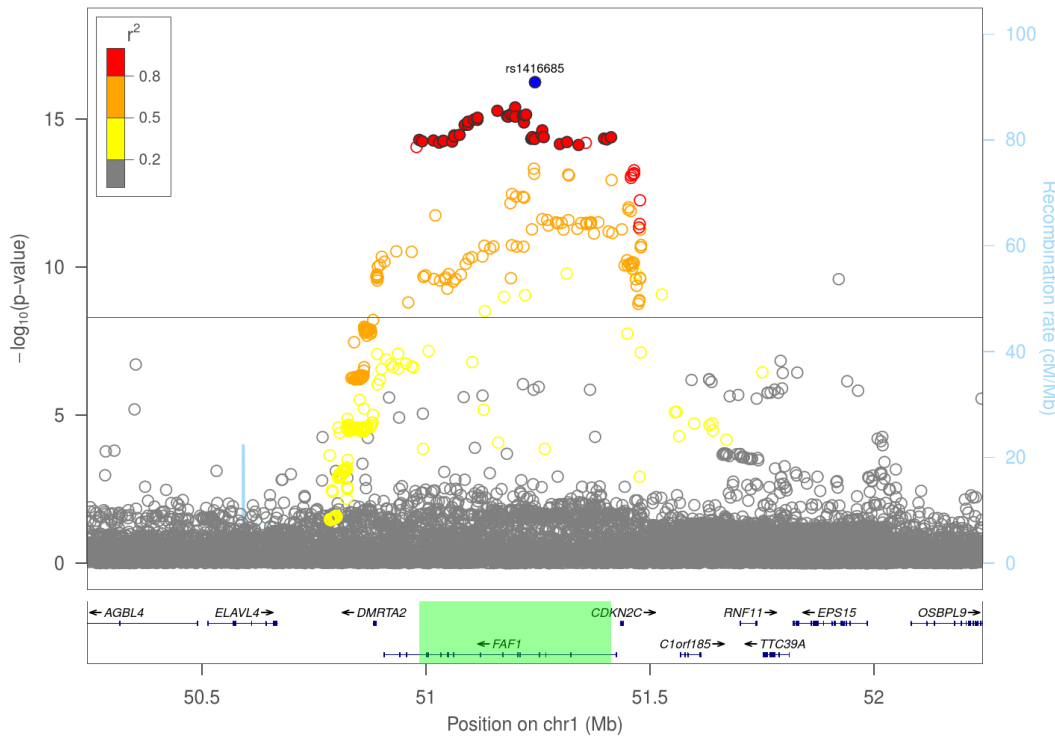

**LOC101926964, FEV<sub>1</sub>/FVC tier 1 rs72673461**

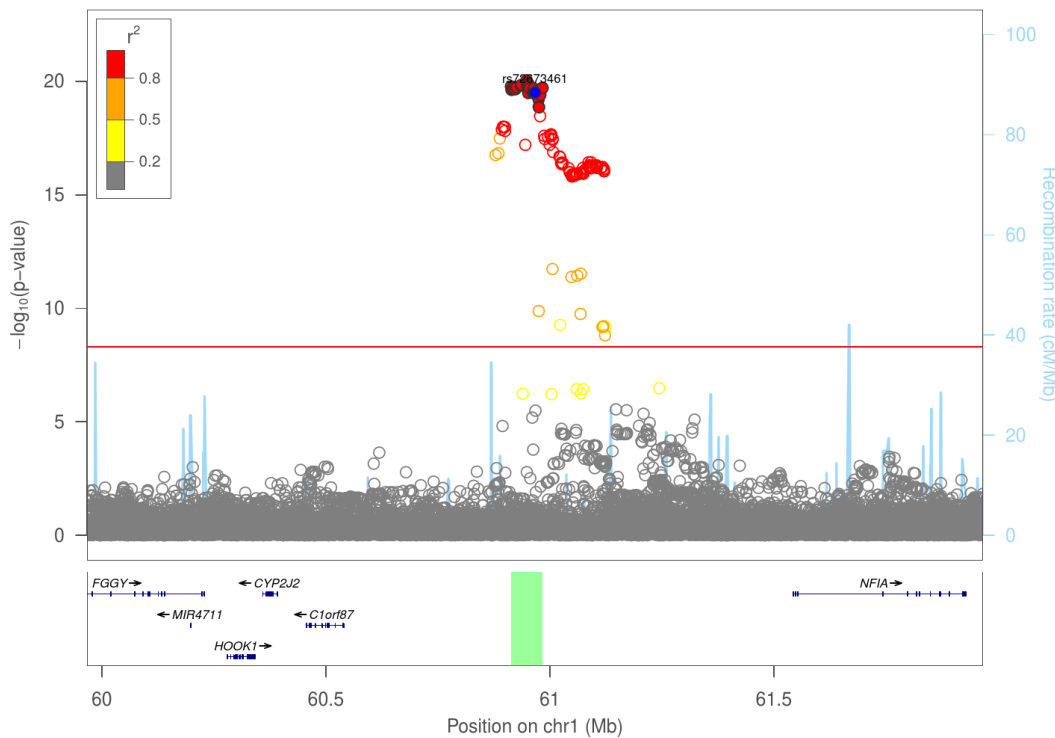

**NEXN, FEV<sub>1</sub>/FVC tier 1 rs9661687**

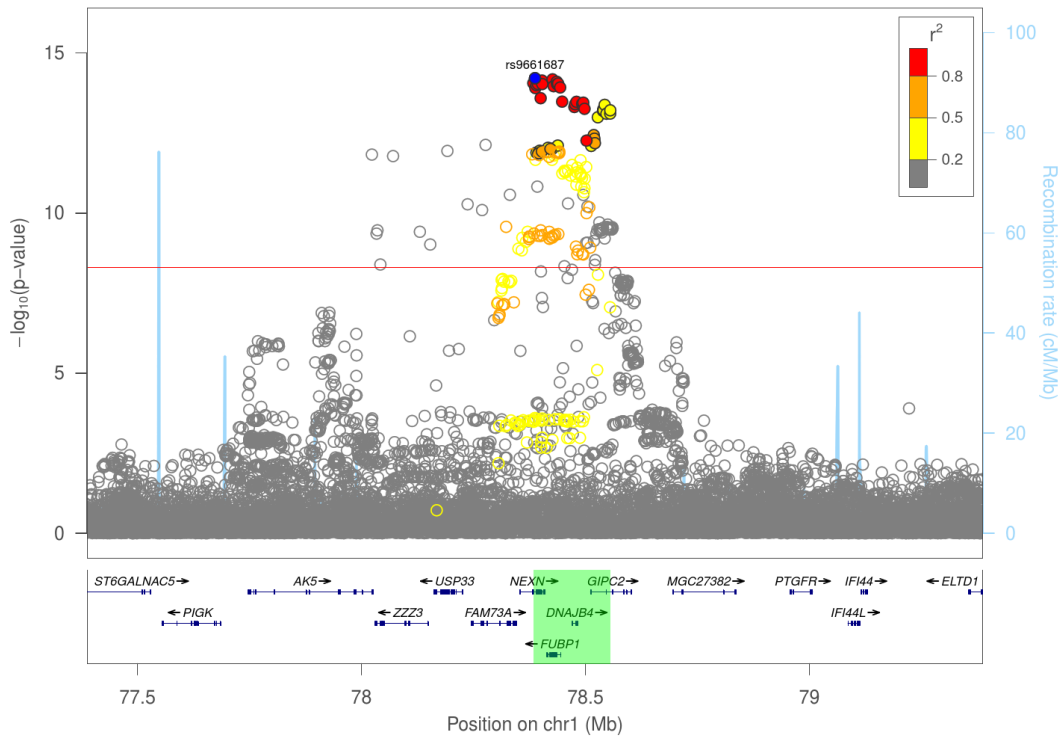

**TGFBR3, FEV<sub>1</sub>/FVC tier 1 rs10874851**

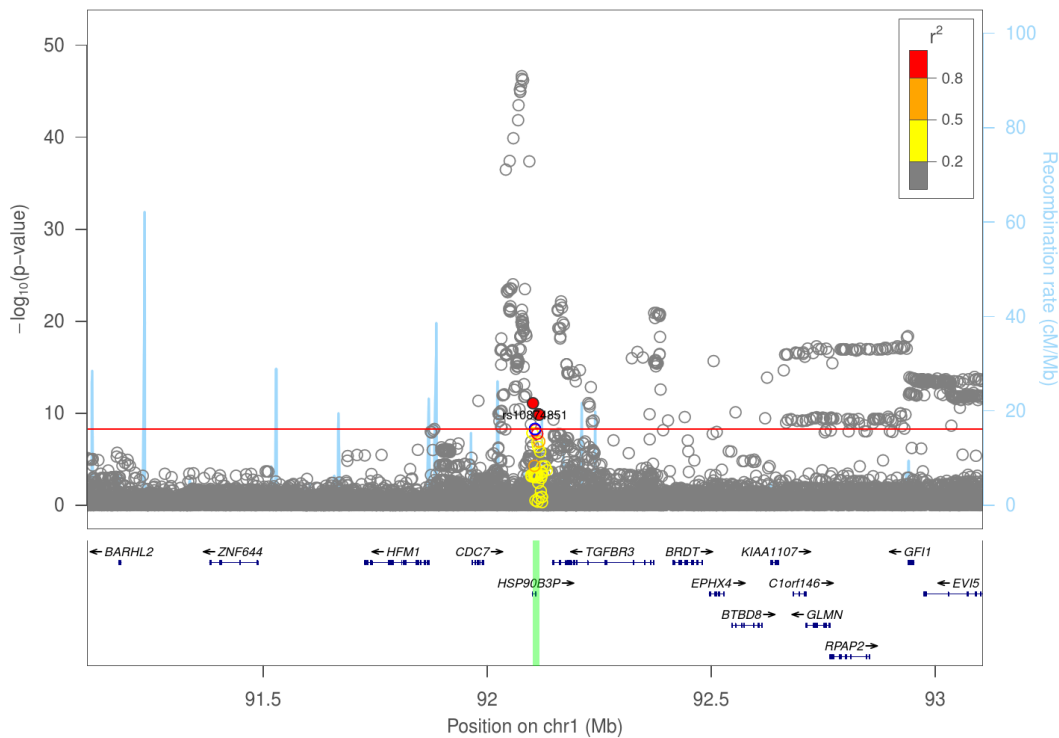



***DENND2D*, *FEV*<sub>1</sub>/*FVC* tier 1 rs9970286**

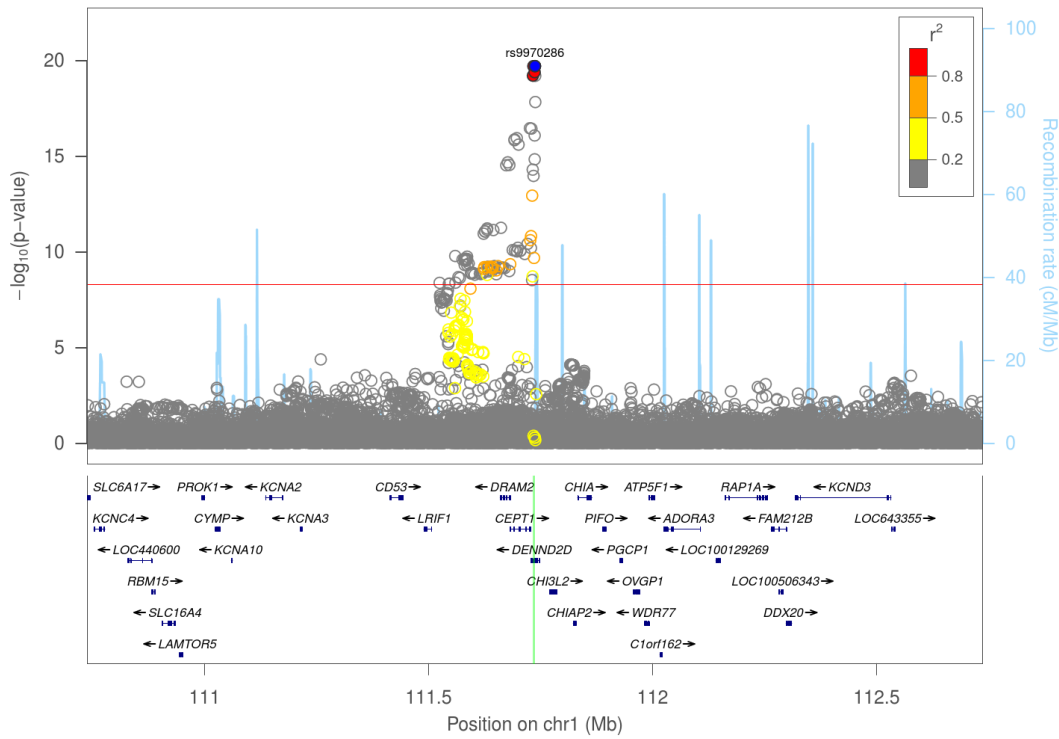

***C1orf54*, *PEF* tier 1 rs11205354**

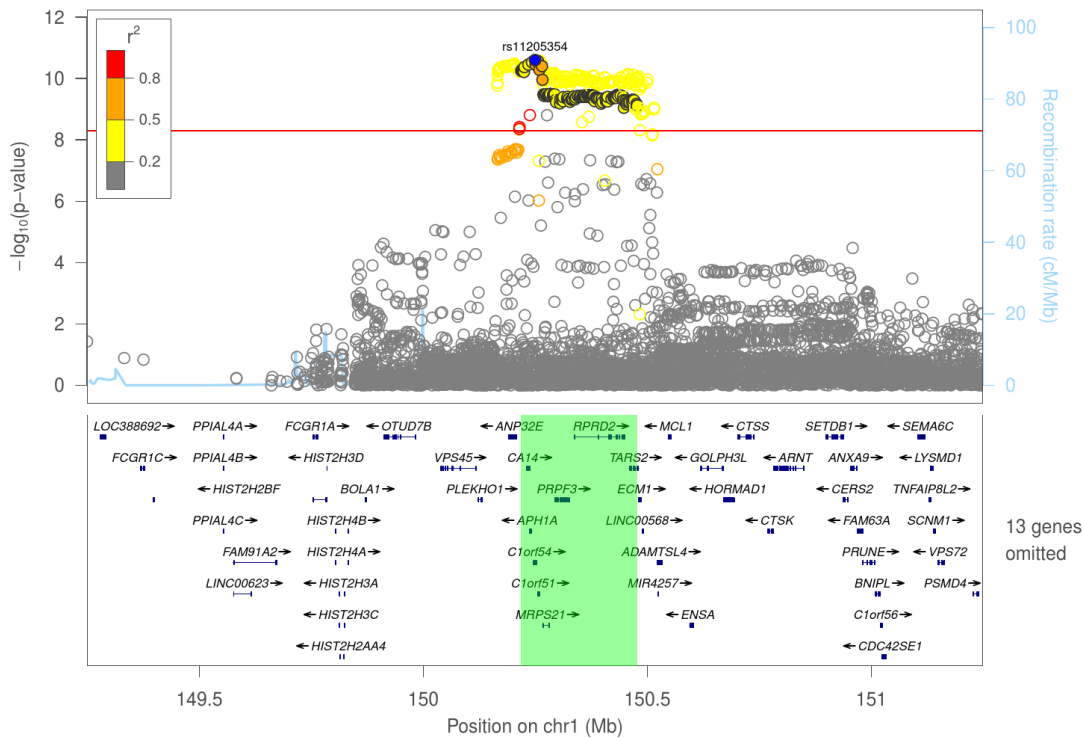

**KRTCAP2, FEV<sub>1</sub>/FVC tier 1 rs141942982**

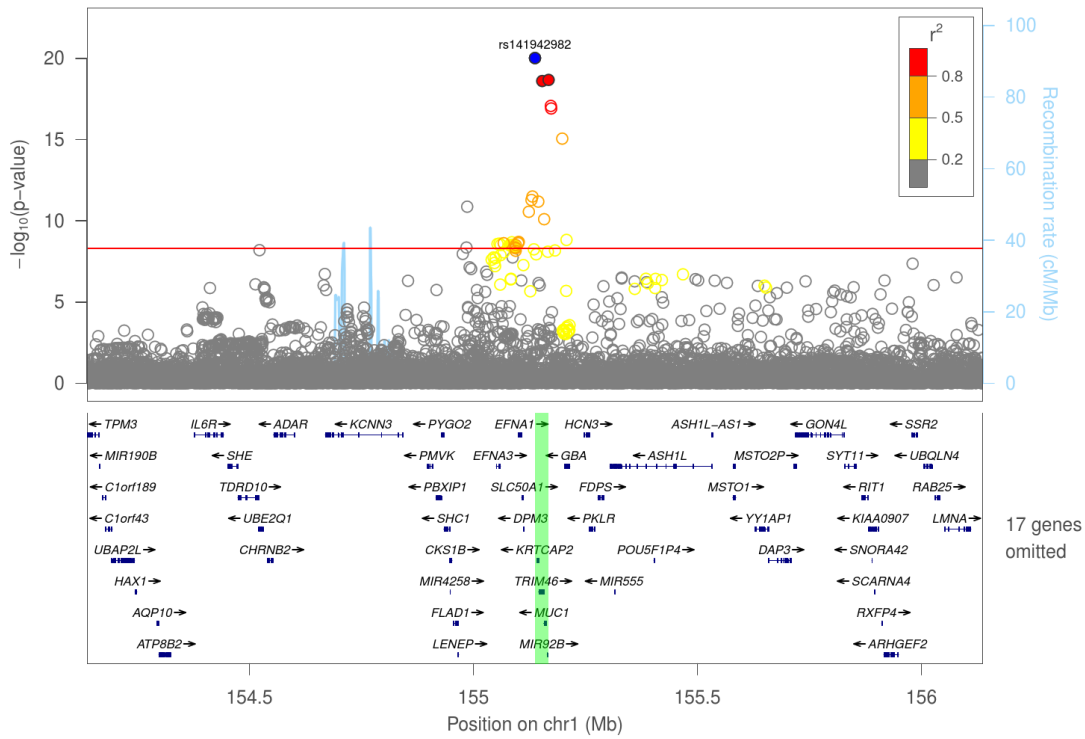

**RALGPS2, FEV<sub>1</sub> tier 1 rs4651005**

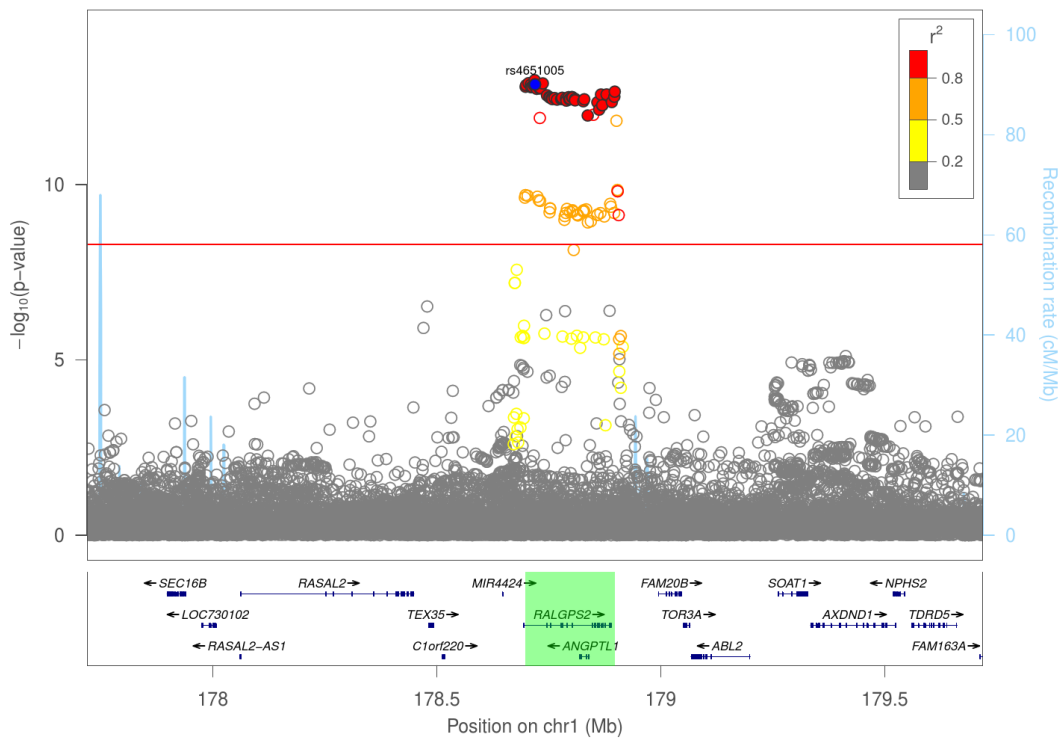

**MIR548F1, FVC tier 1 rs2146098**

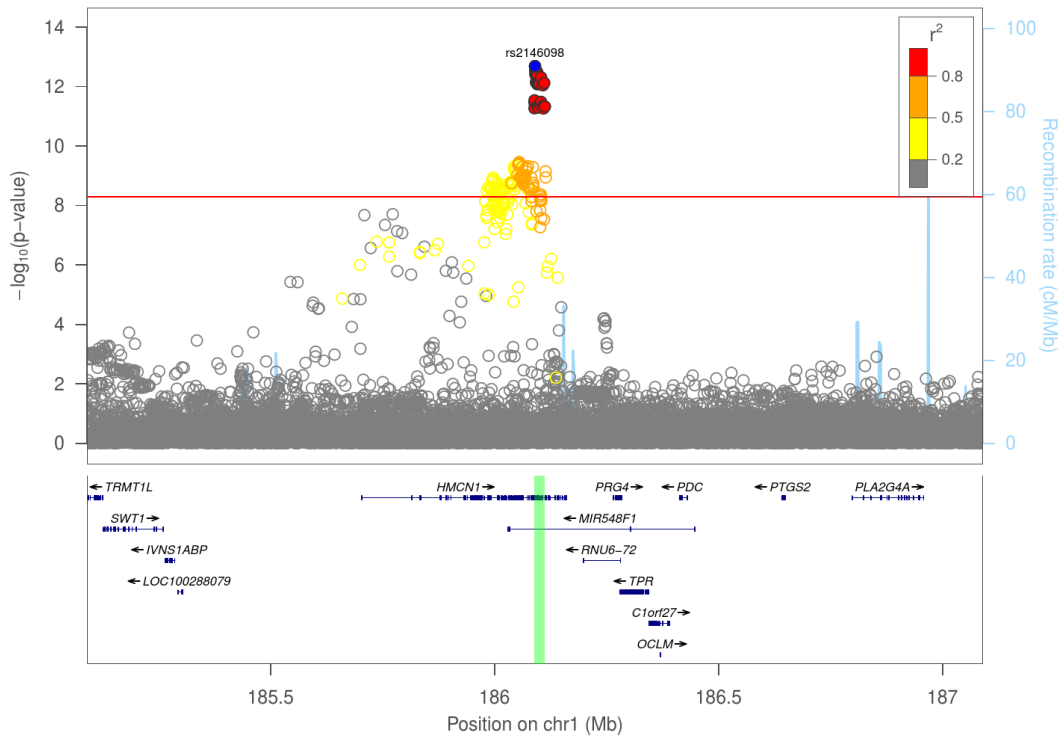

**MIR548F1, FEV<sub>1</sub>/FVC tier 1 rs17531405**

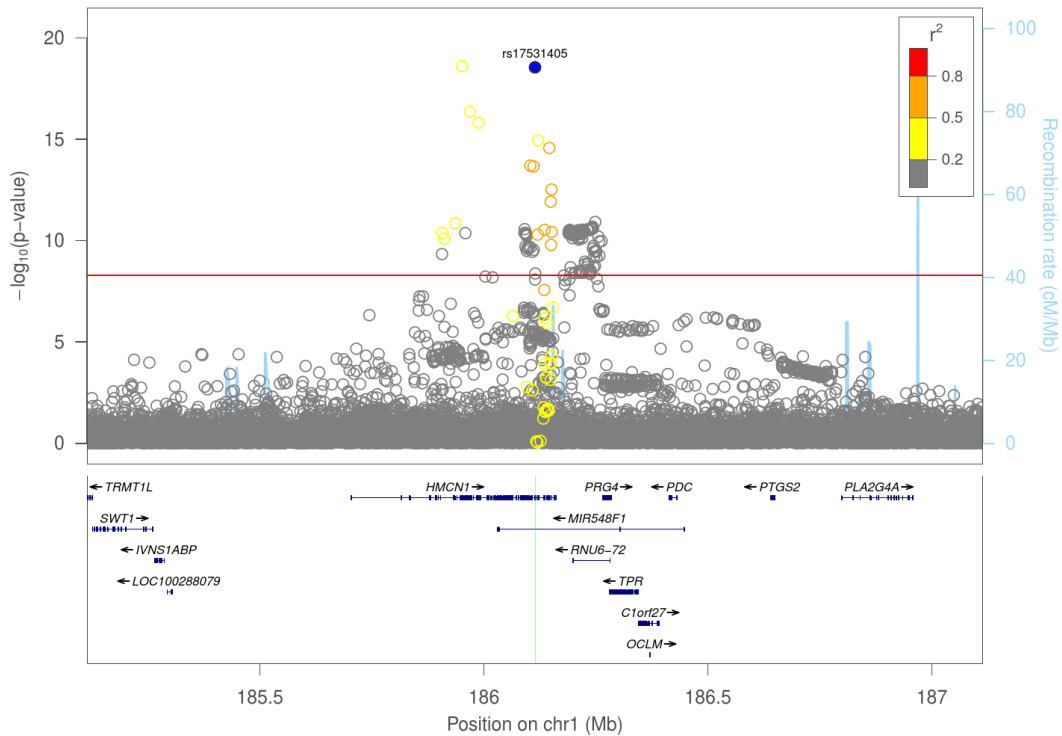

**MIR181A1HG, FEV<sub>1</sub>/FVC tier 1 rs10919604**

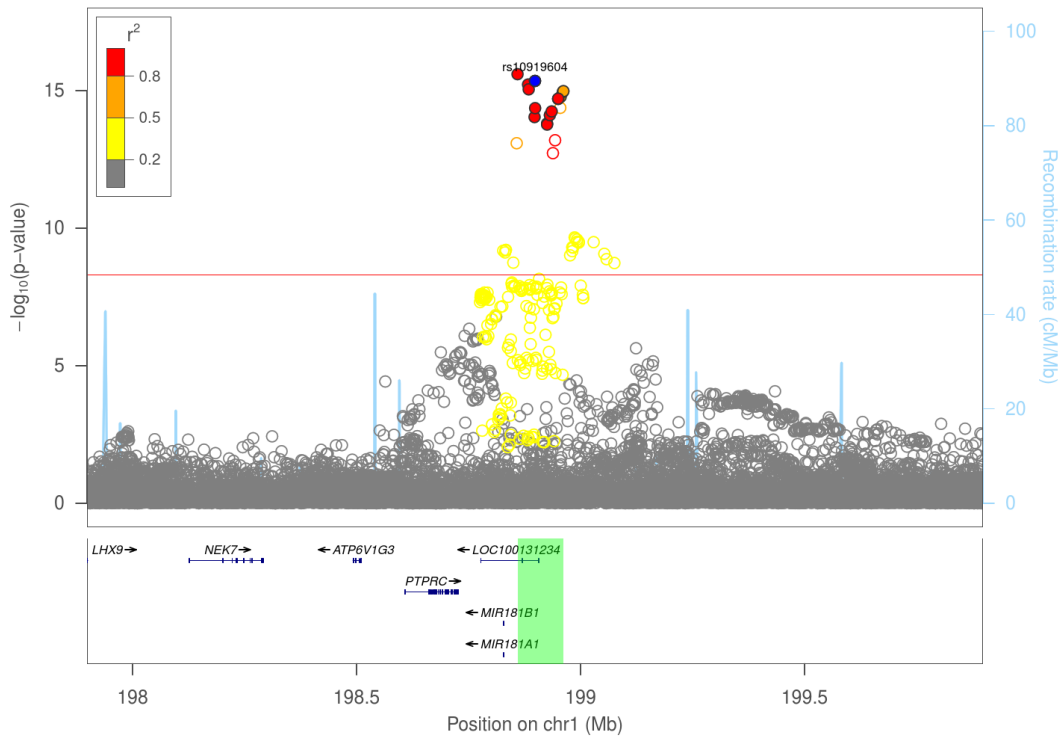

**LMOD1, FEV<sub>1</sub>/FVC tier 2 rs4309038**

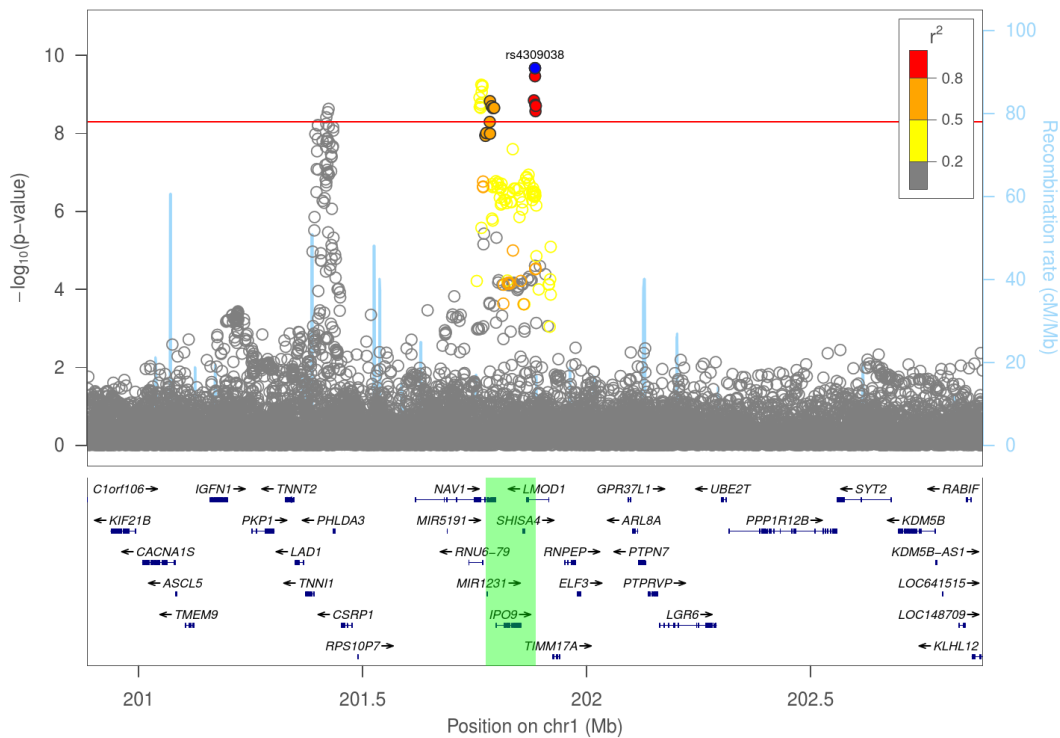

**TGFB2, FEV<sub>1</sub>/FVC tier 1 rs2799098**

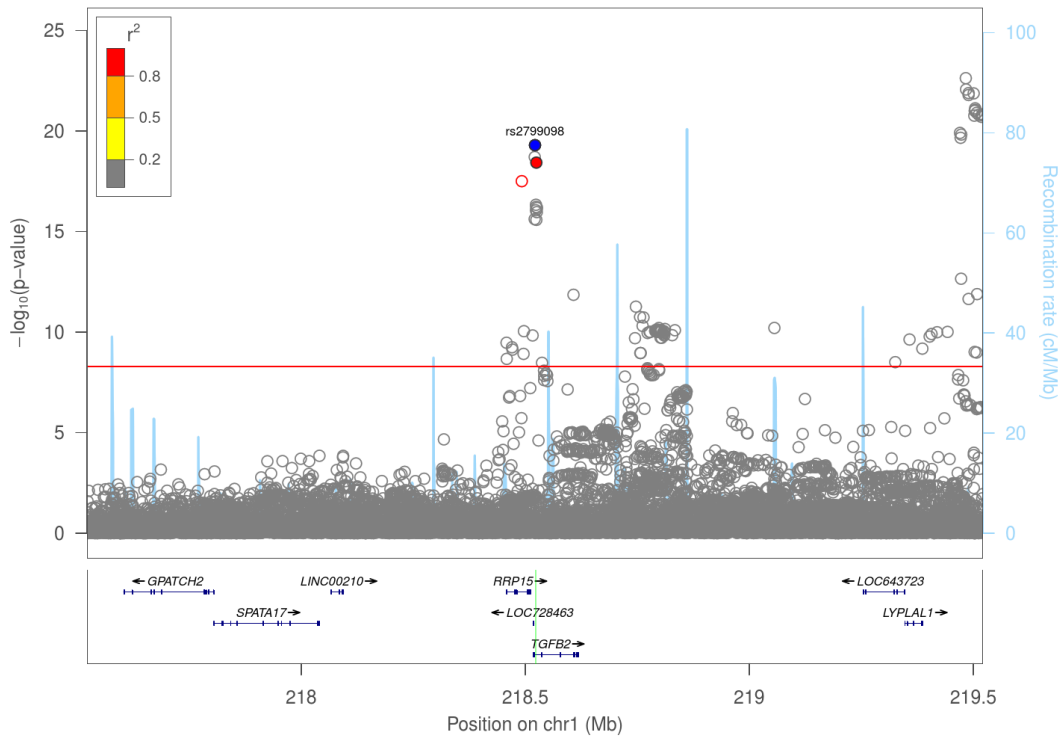

**LYPLAL1, FEV<sub>1</sub>/FVC tier 1 rs75128958**

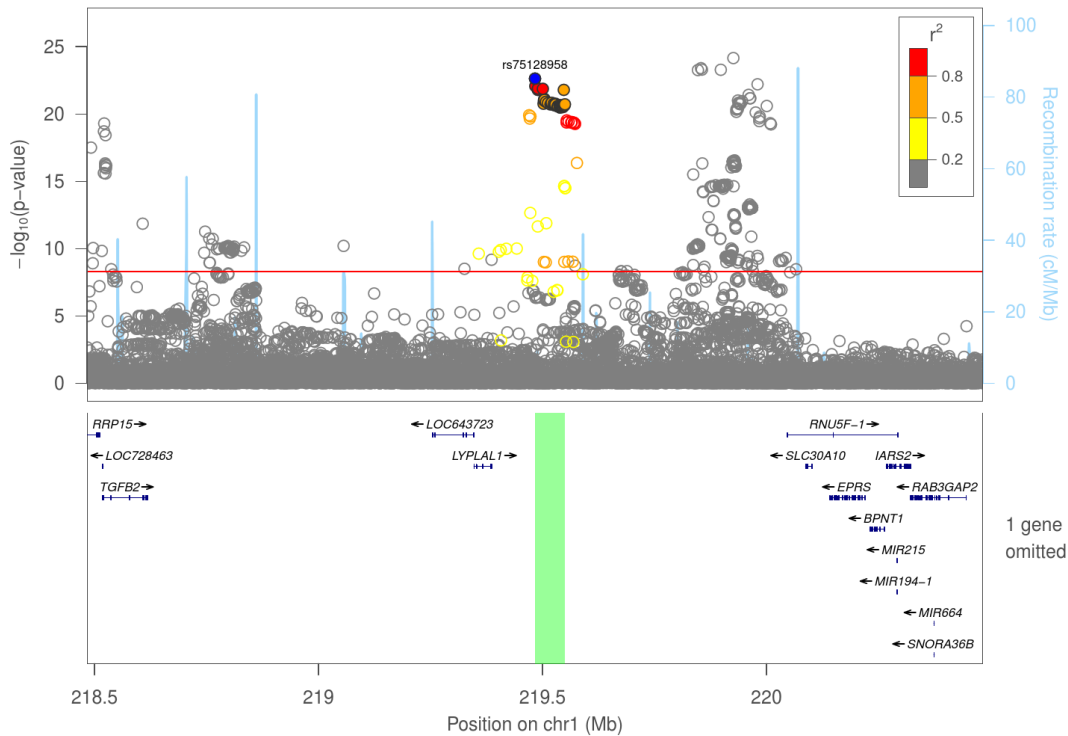

**HLX, FVC tier 1 rs17009288**

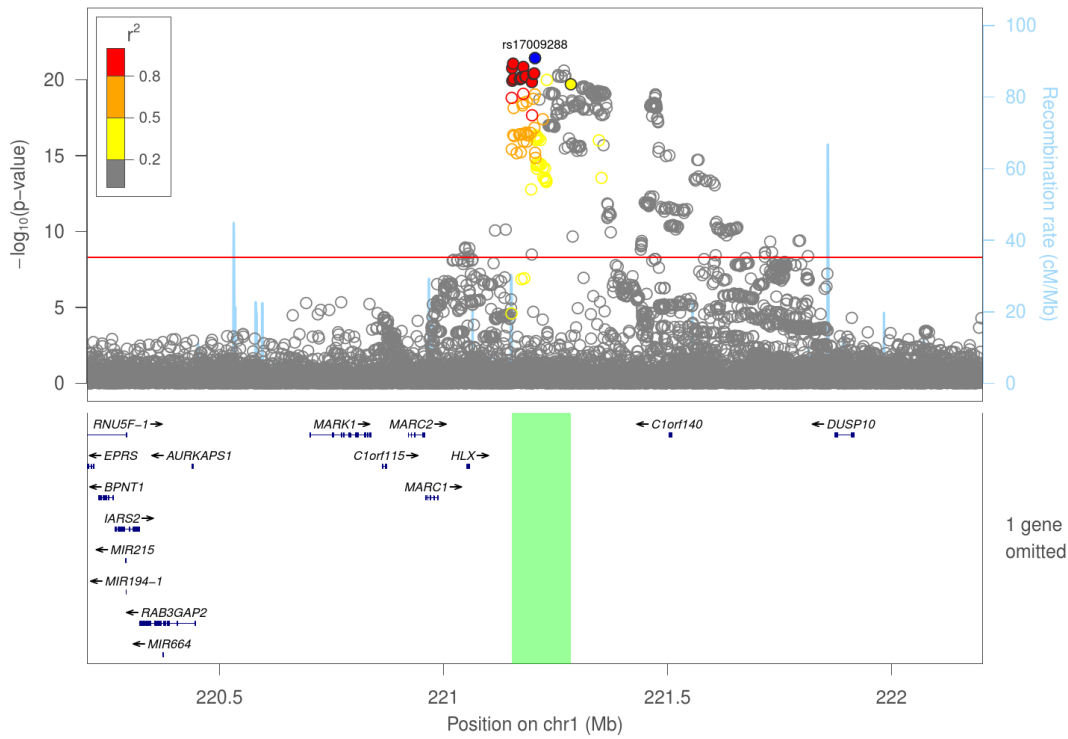

**LOC101926966, FEV<sub>1</sub>/FVC tier 1 rs2544536**

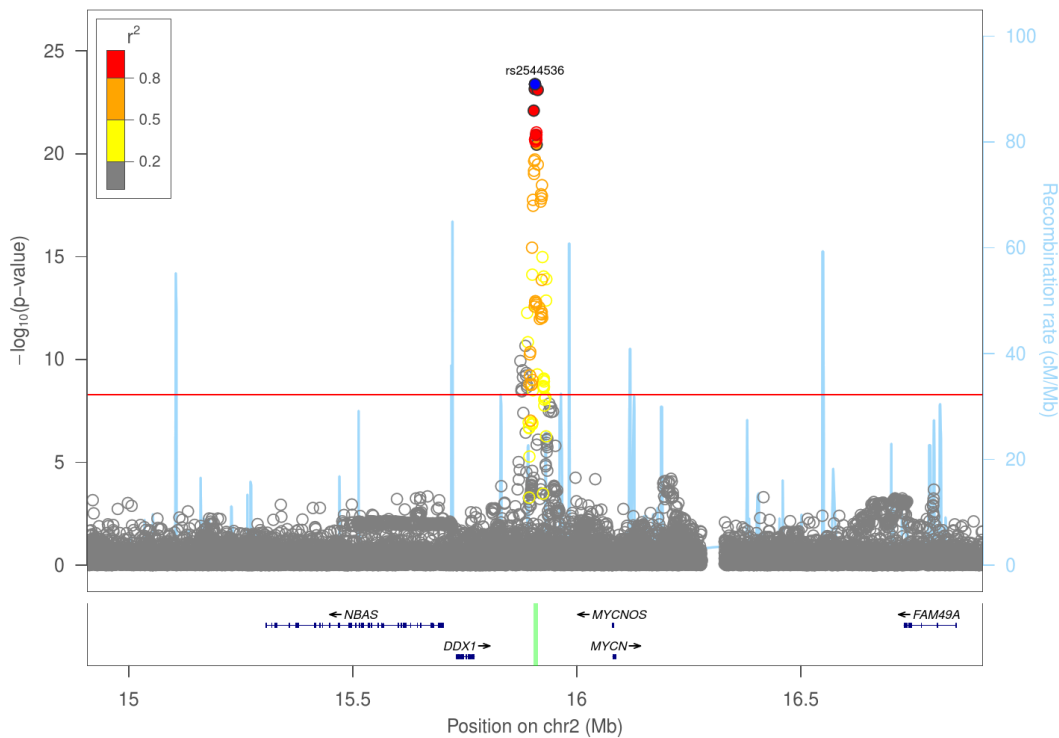

**RDH14, FVC tier 1 rs6751968**

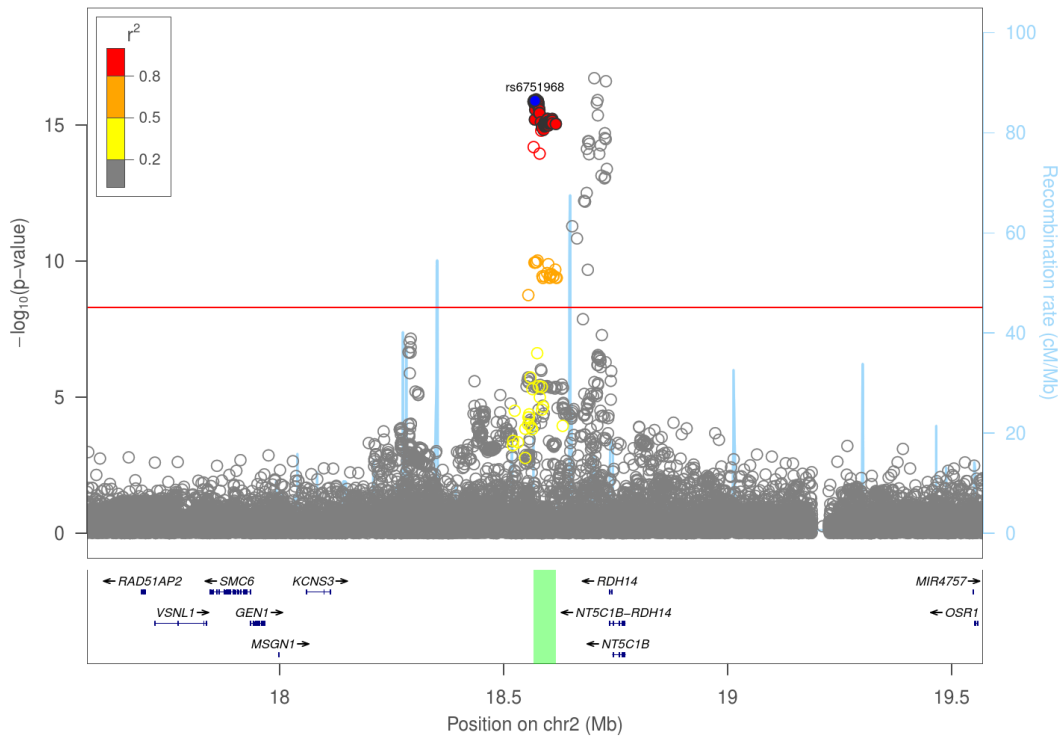

**RDH14, FVC tier 1 rs13430465**

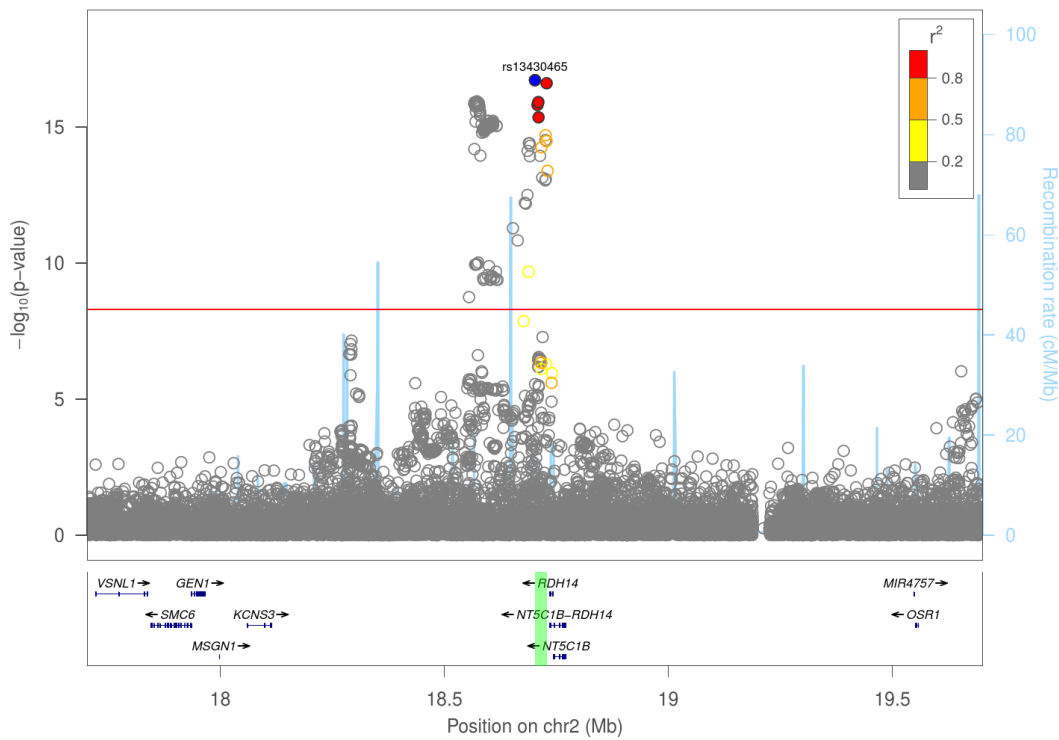

**ATAD2B, FVC tier 2 rs13009582**

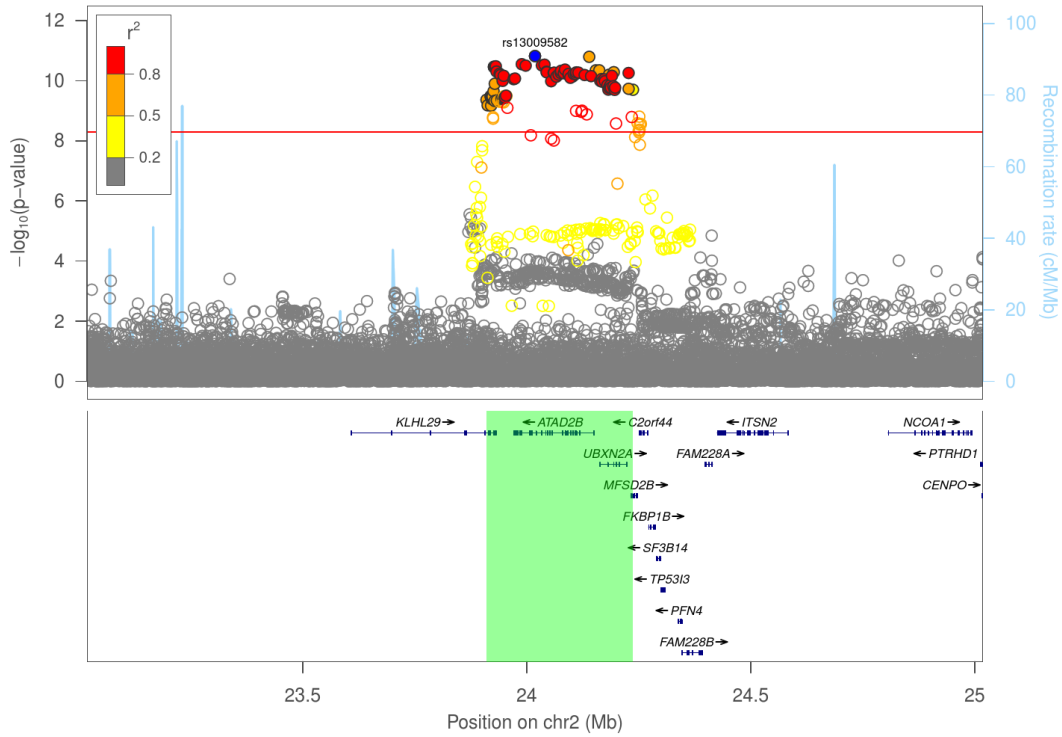

**CIB4, FVC tier 2 rs732990**

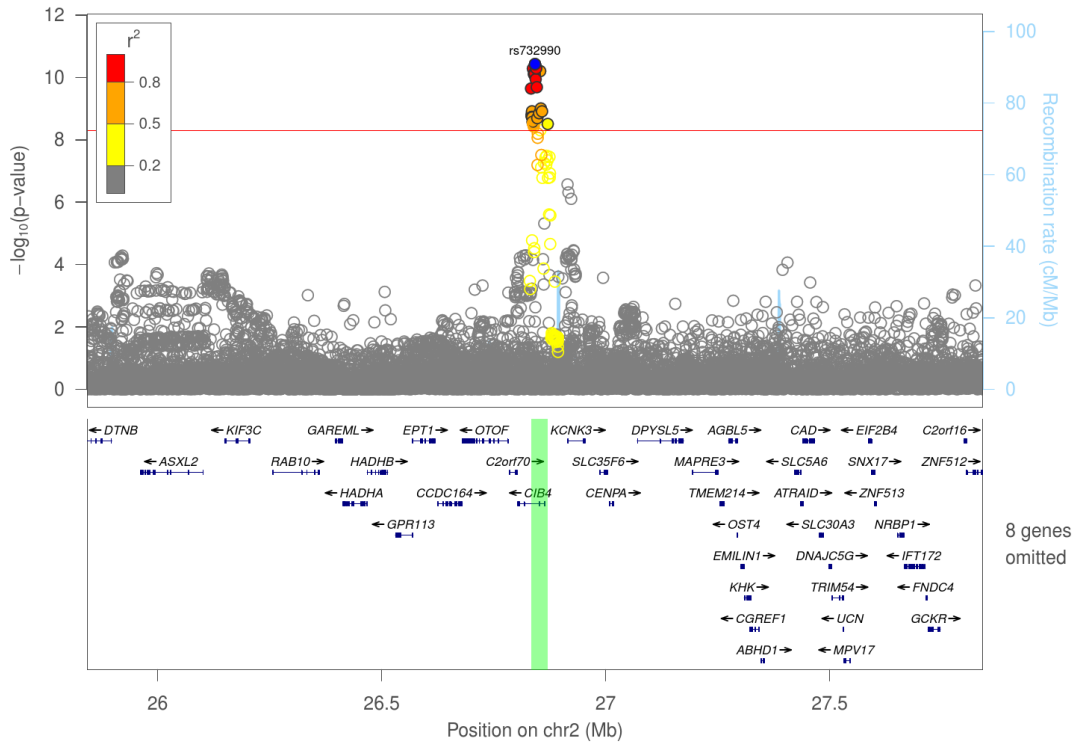



**PKDCC, FVC tier 1 rs4952564**

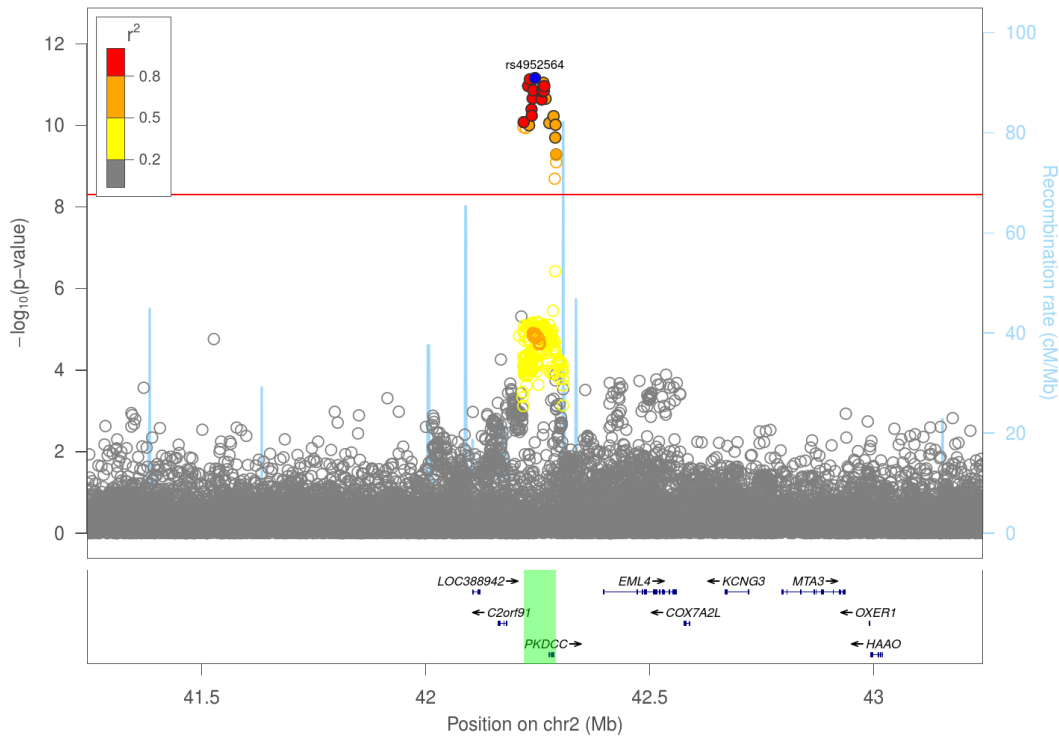

**IL1RL1, FEV<sub>1</sub>/FVC tier 1 rs12470864**

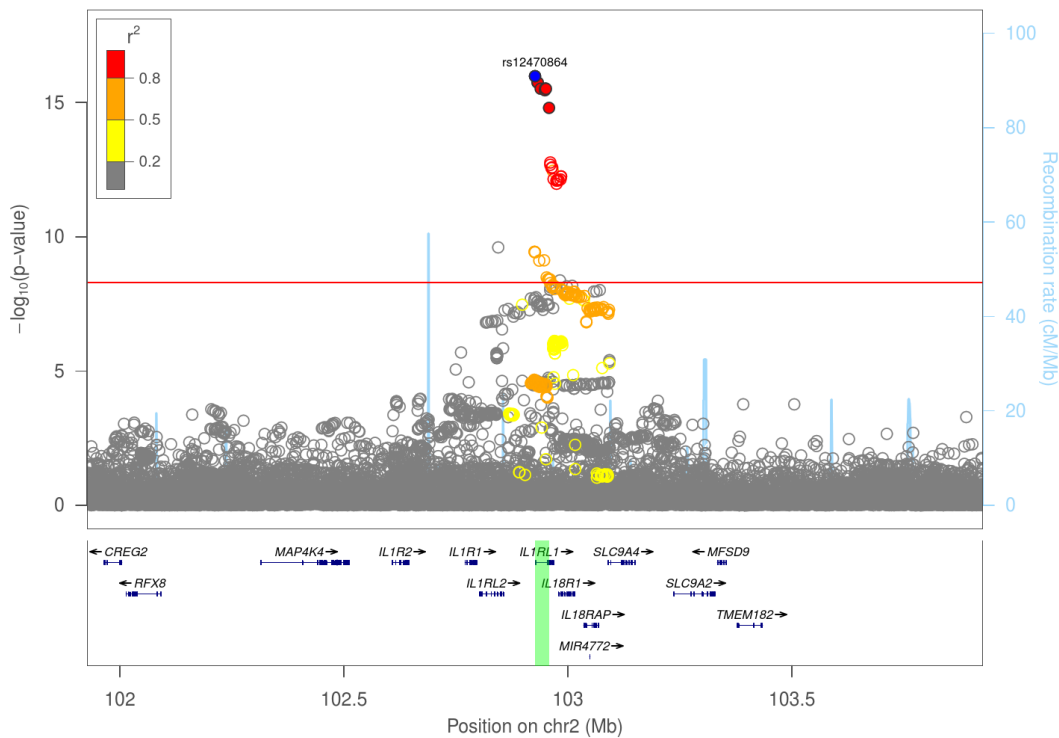

**TEX41, FEV<sub>1</sub>/FVC tier 1 rs1406225**

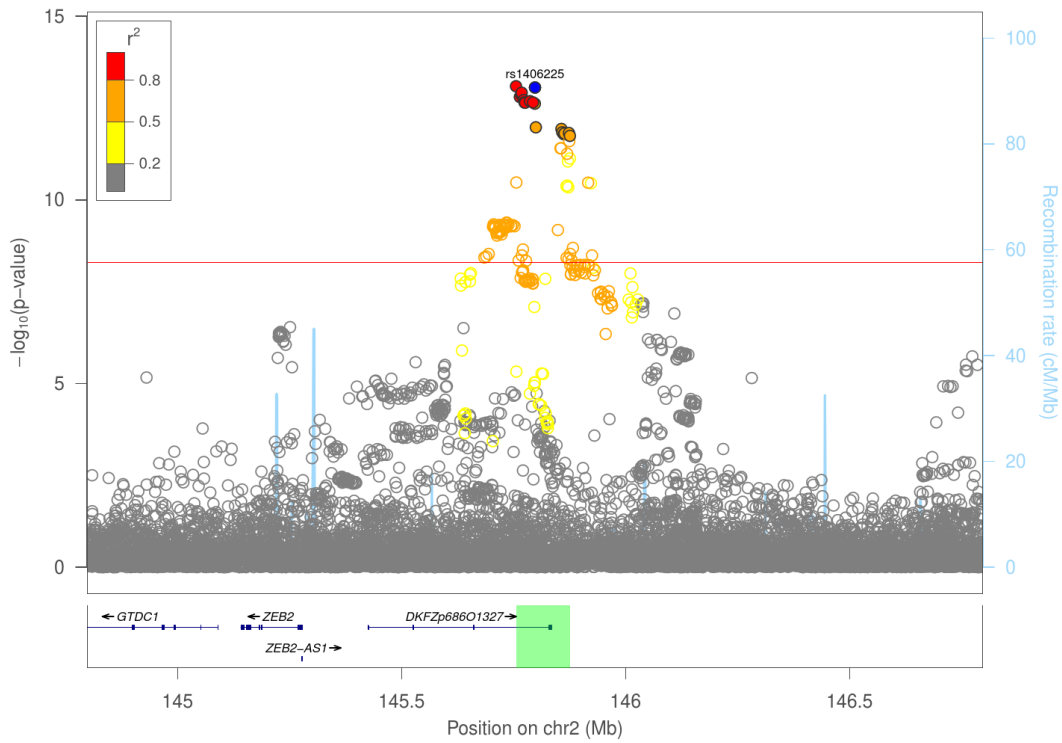

**RBMS1, FEV<sub>1</sub> tier 1 rs7424771**

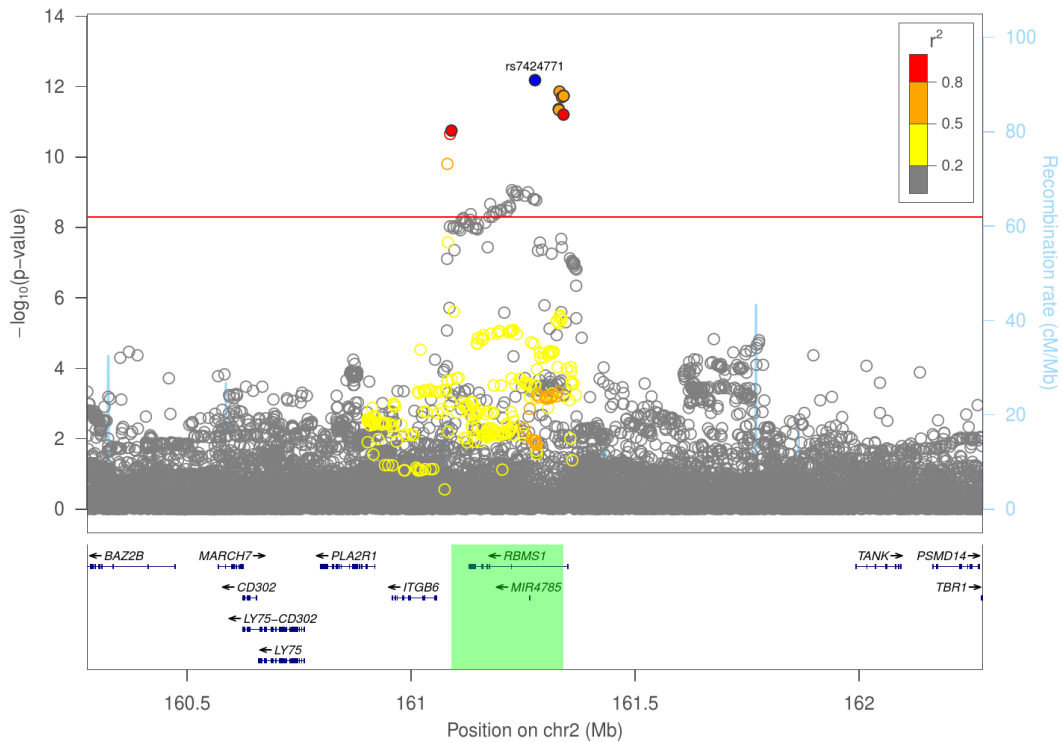

**MIR548N, FEV<sub>1</sub> tier 2 rs2304340**

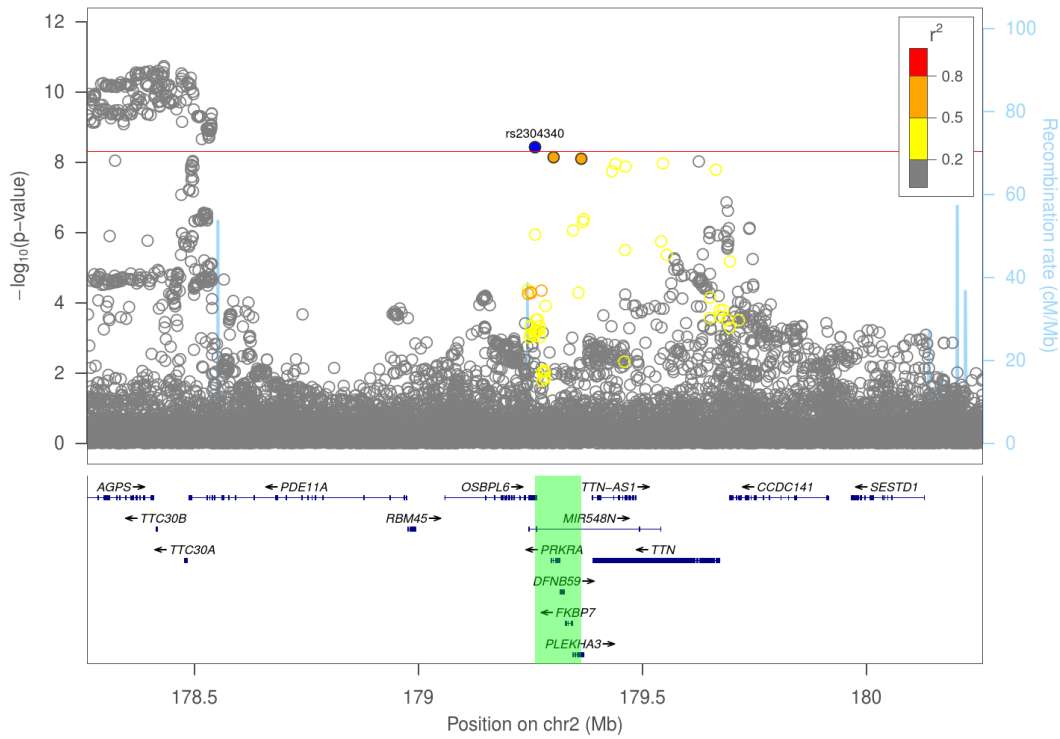

**ITGAV, FEV<sub>1</sub>/FVC tier 1 rs2084448**

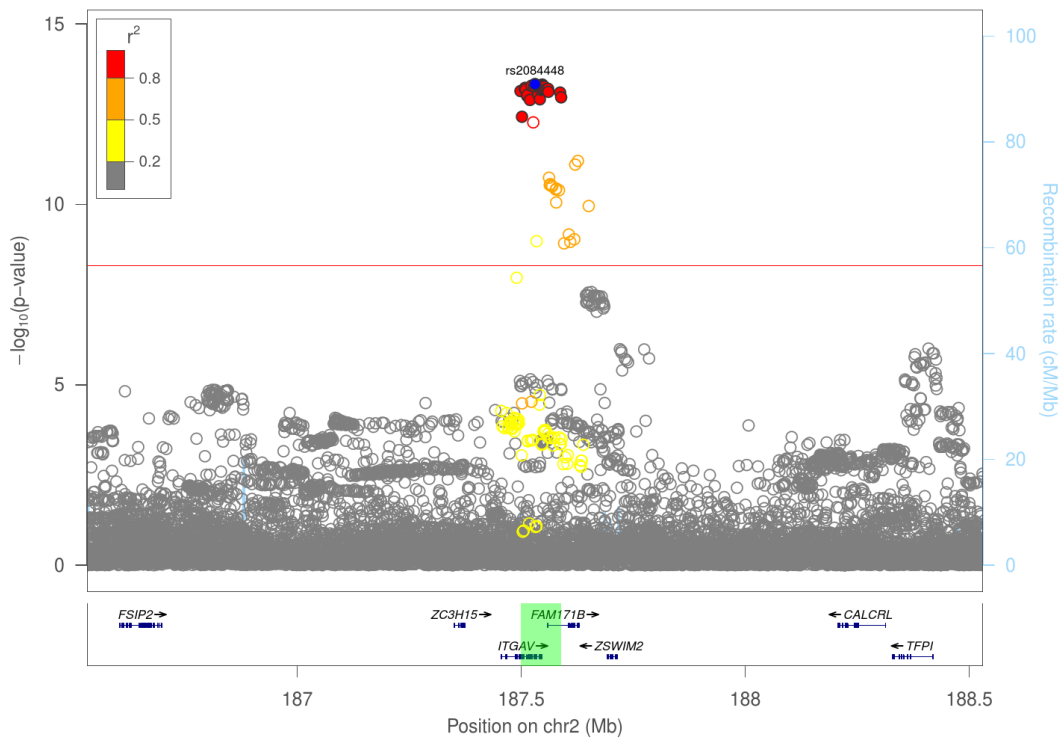

**SATB2, FVC tier 1 rs1249096**

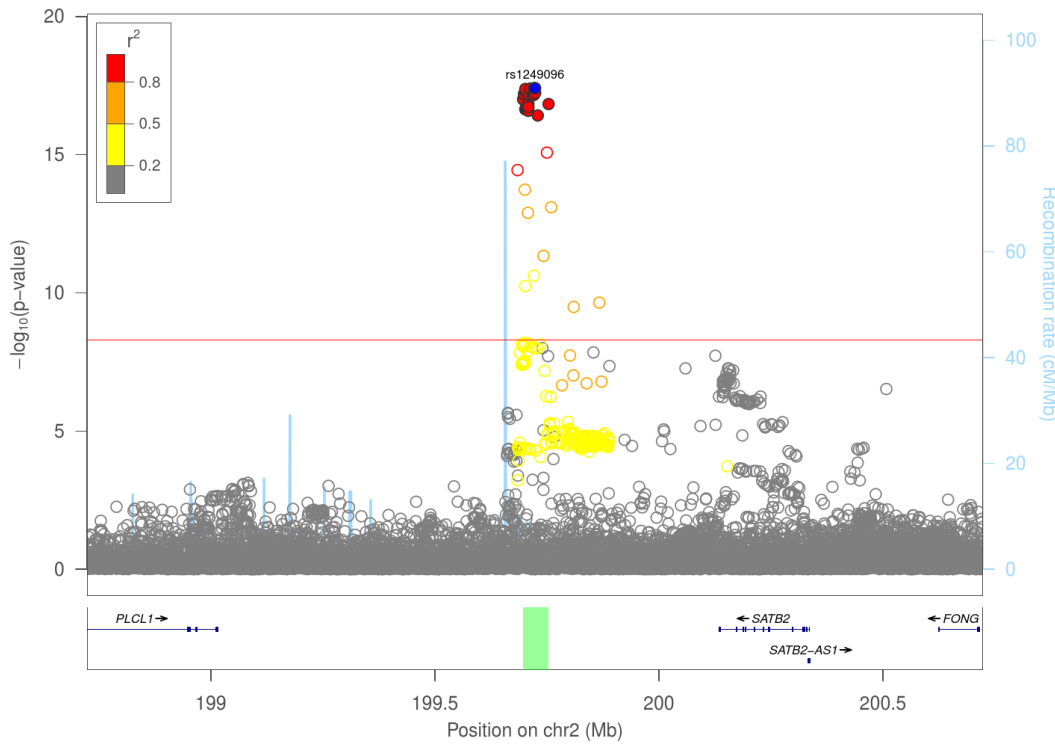

**SPATS2L, FEV<sub>1</sub>/FVC tier 2 rs985256**

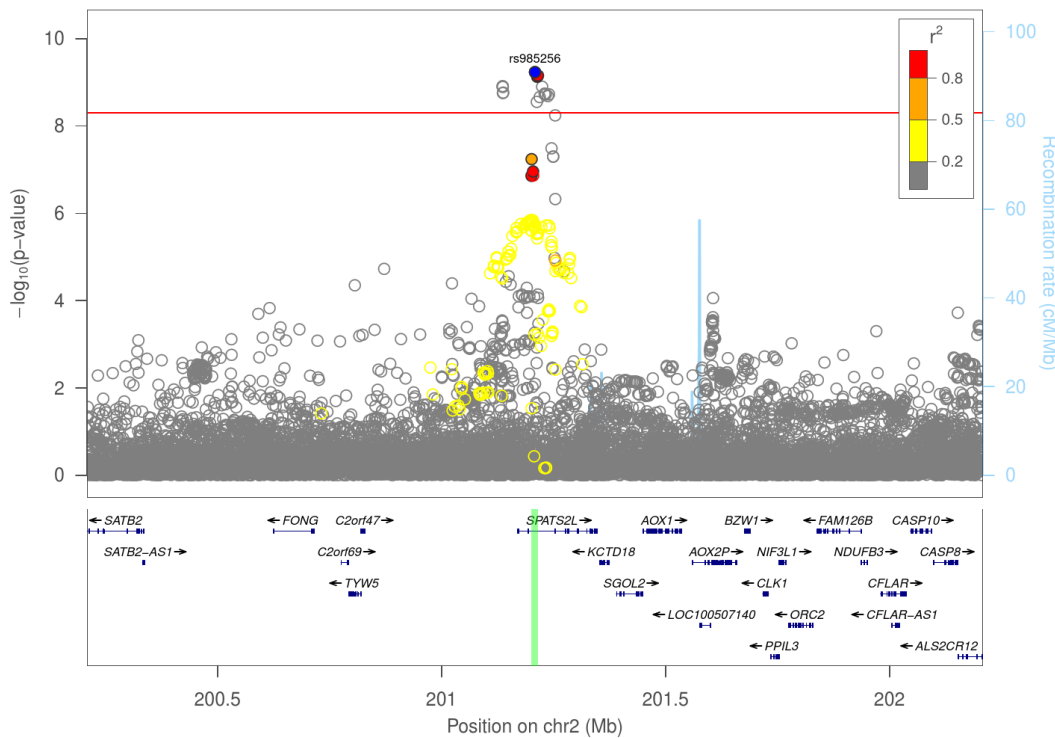

**KIAA2012, FVC tier 2 rs12997625**

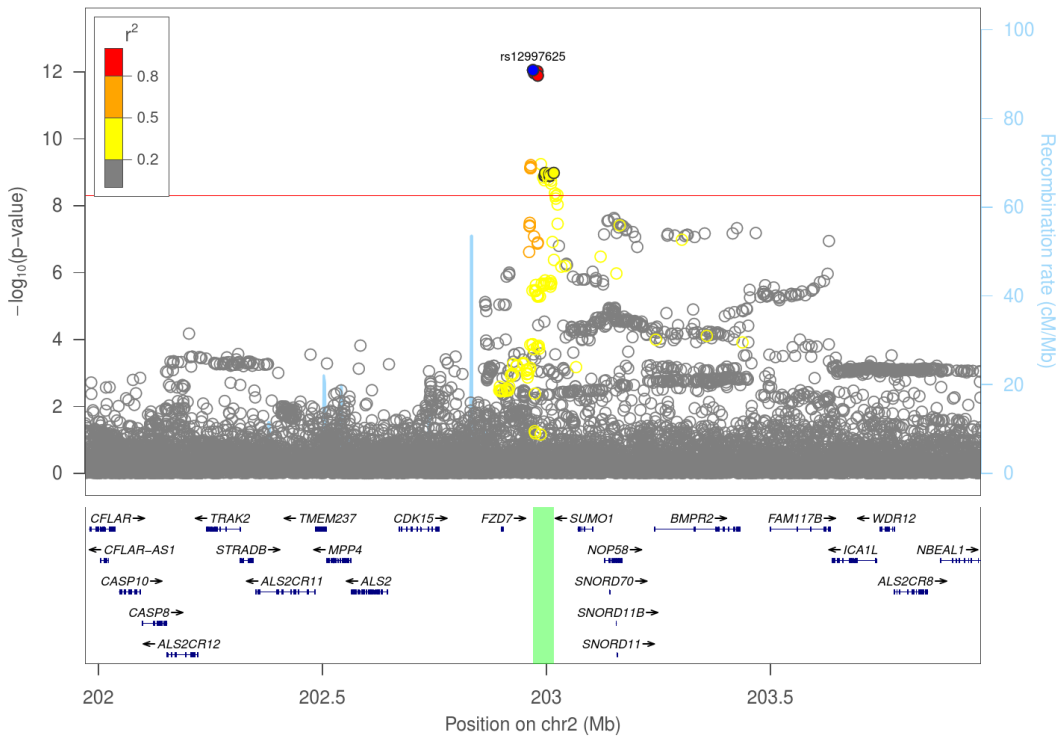

**IGFBP5, FEV<sub>1</sub>/FVC tier 1 rs6435952**

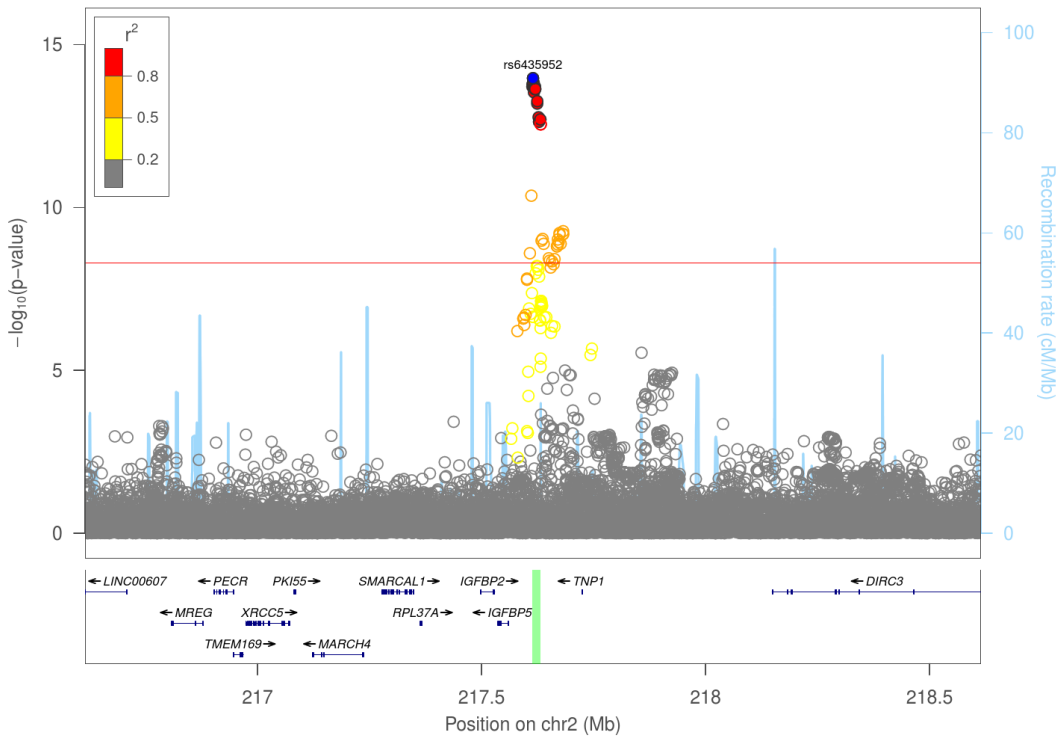

**DIRC3, FEV<sub>1</sub> tier 2 rs4294980**

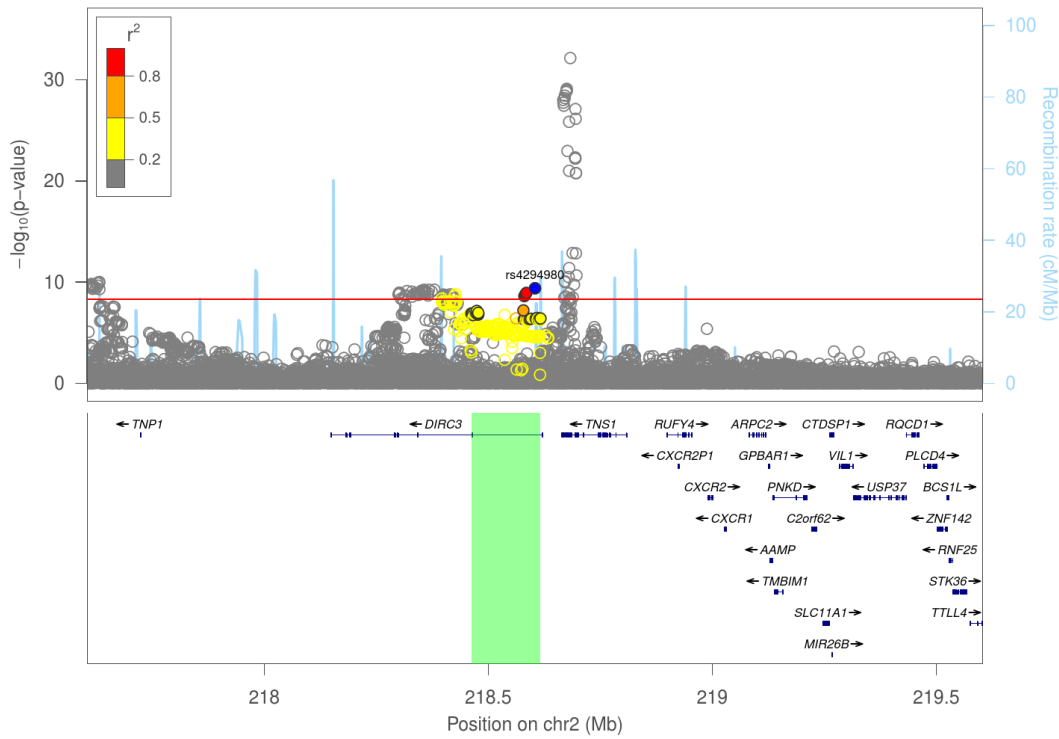

**ASIC4, FVC tier 2 rs4674407**

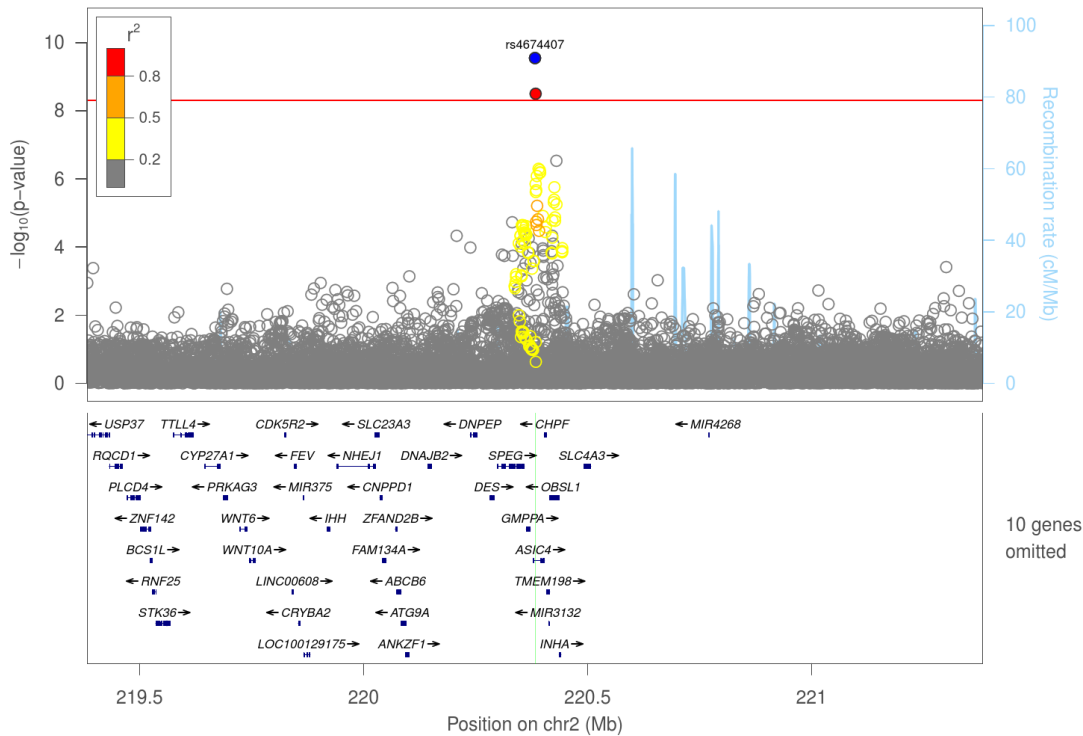

**LINC01107, FVC tier 2 rs6431620**

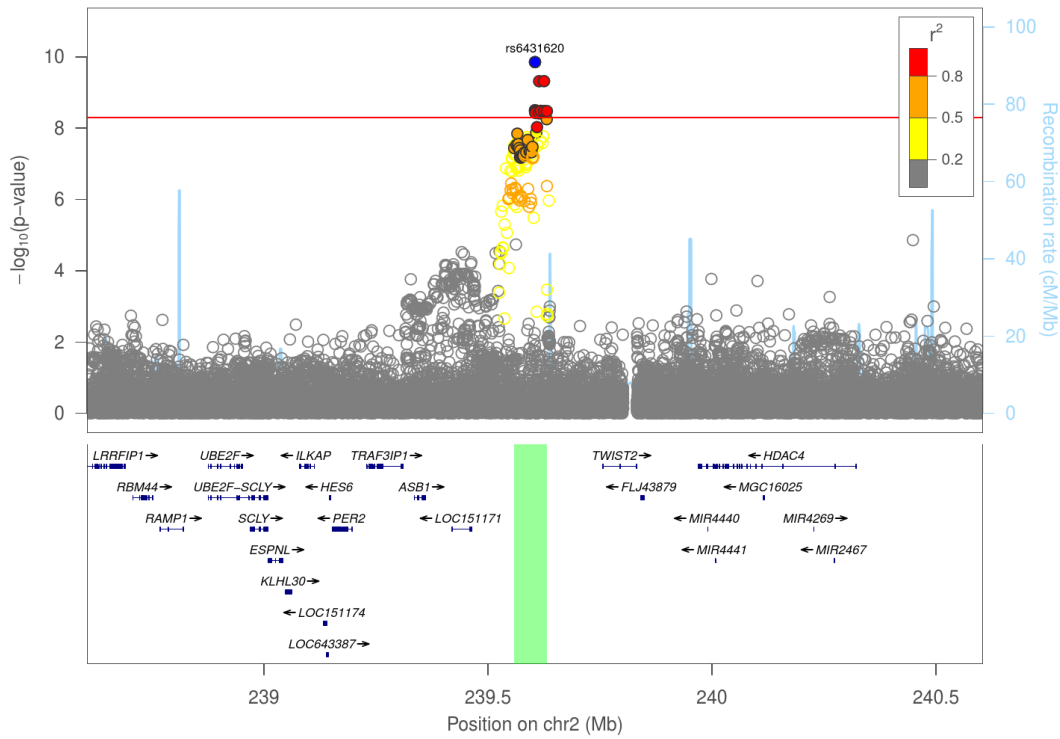

**C2orf54, FVC tier 1 rs6437219**

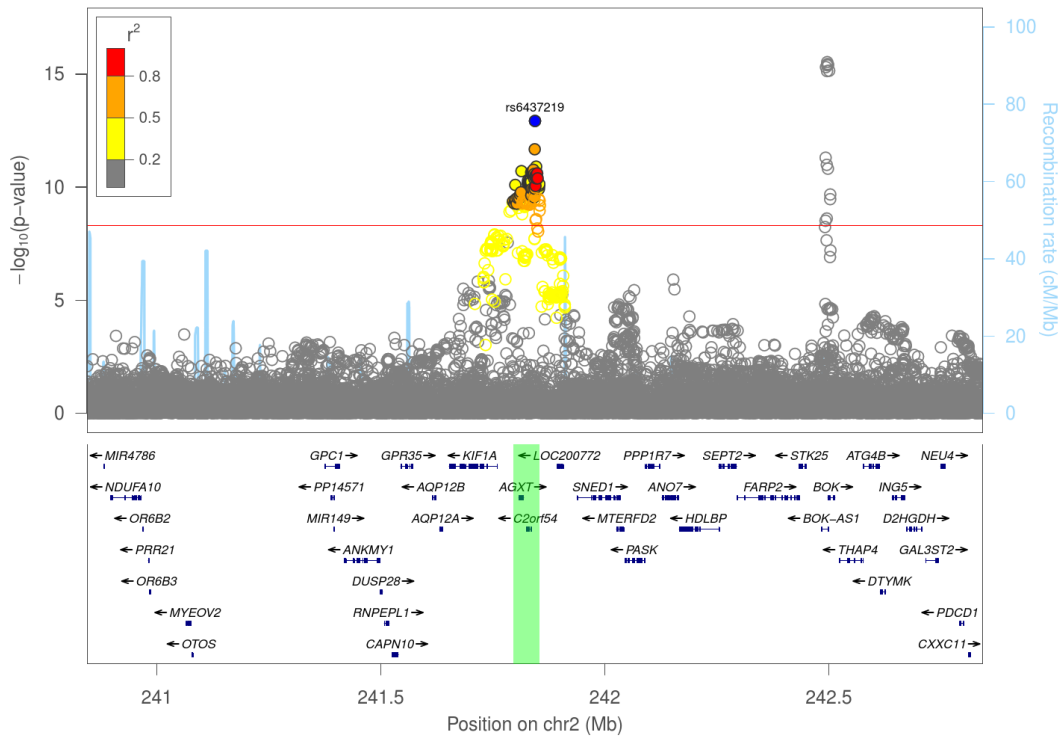

**BOK-AS1, FVC tier 1 rs6723504**

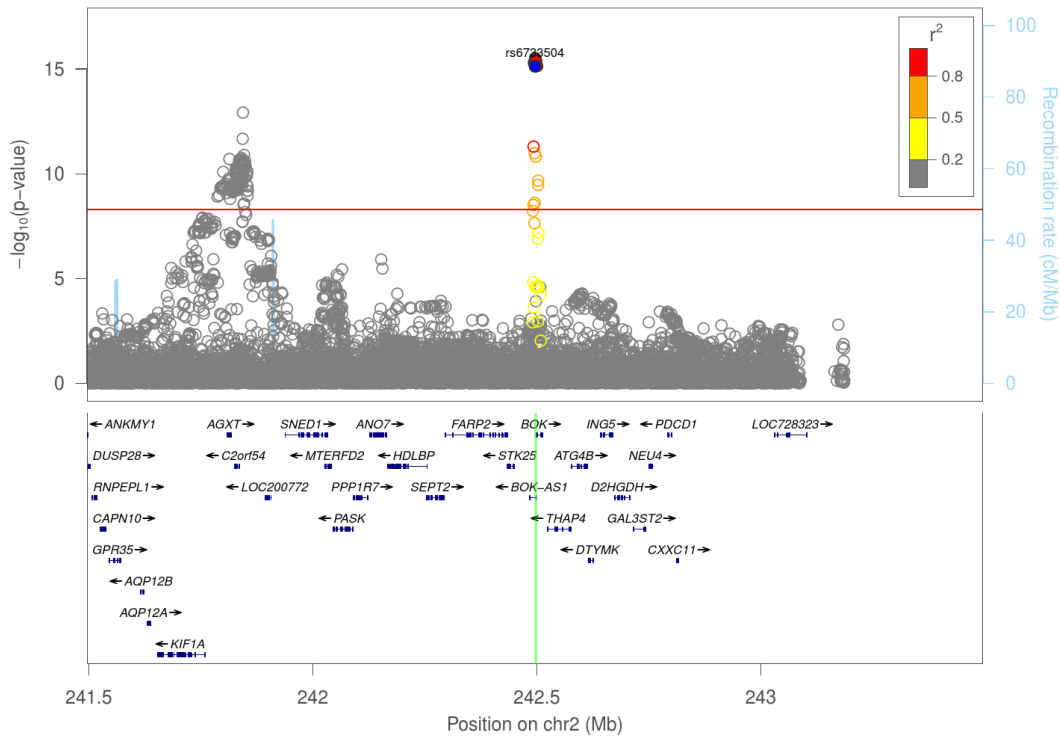

**LINC00620, FEV<sub>1</sub> tier 2 rs2974389**

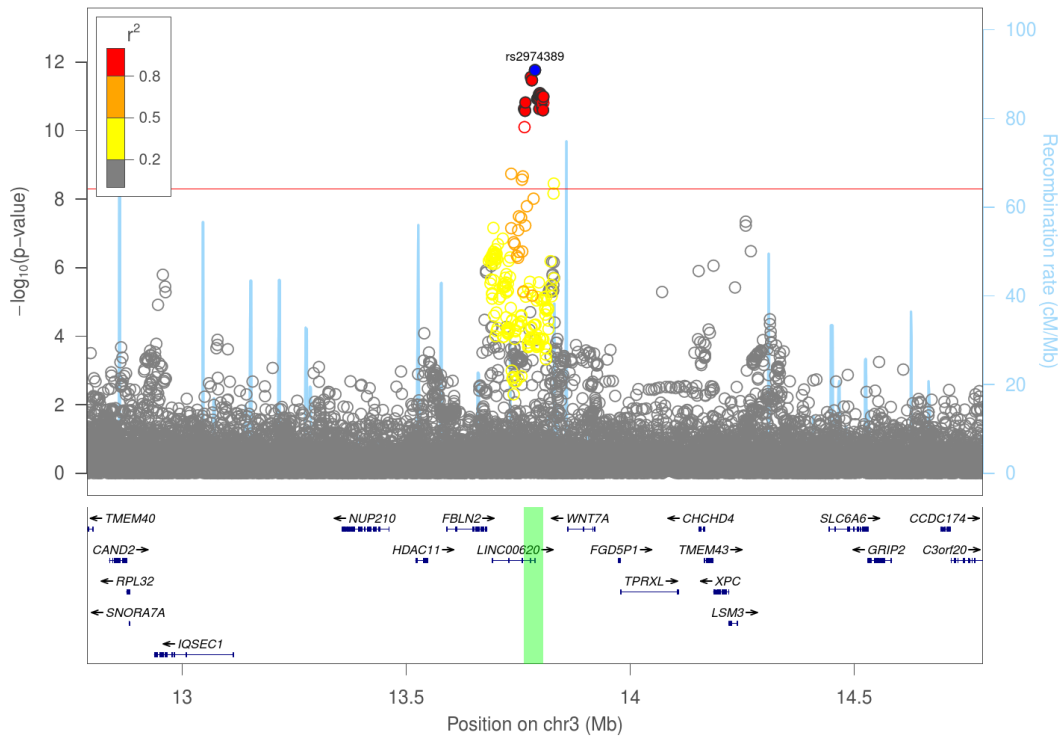



**RARB, FVC tier 2 rs73048404**

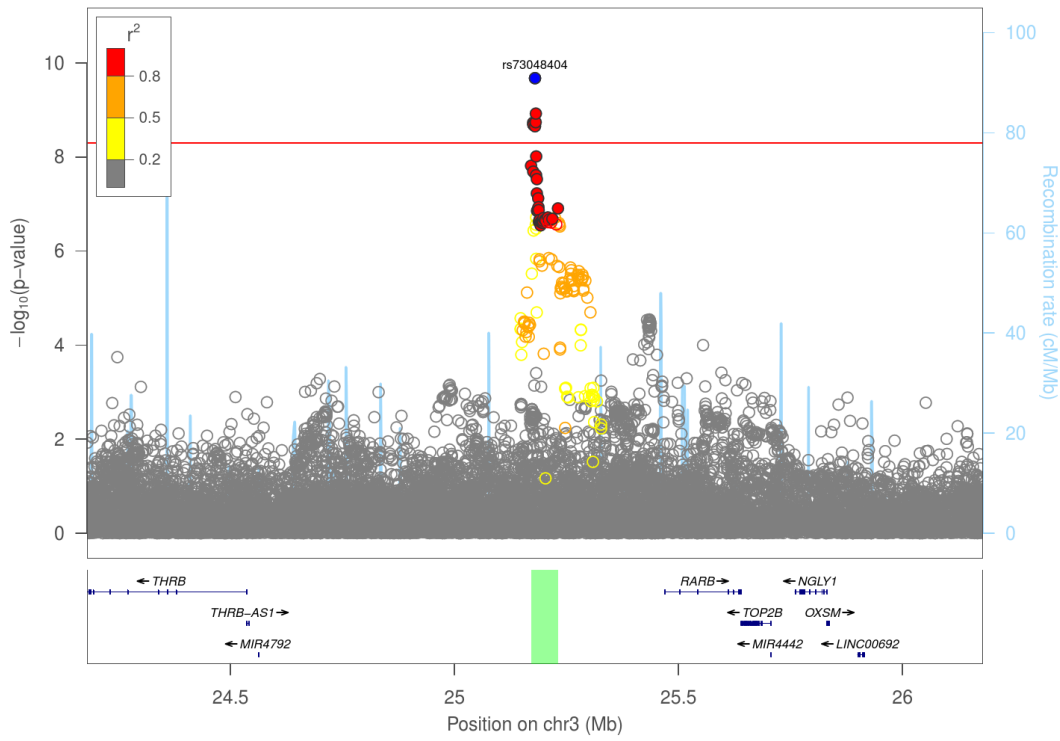

**FOXP1, FVC tier 1 rs35480566**

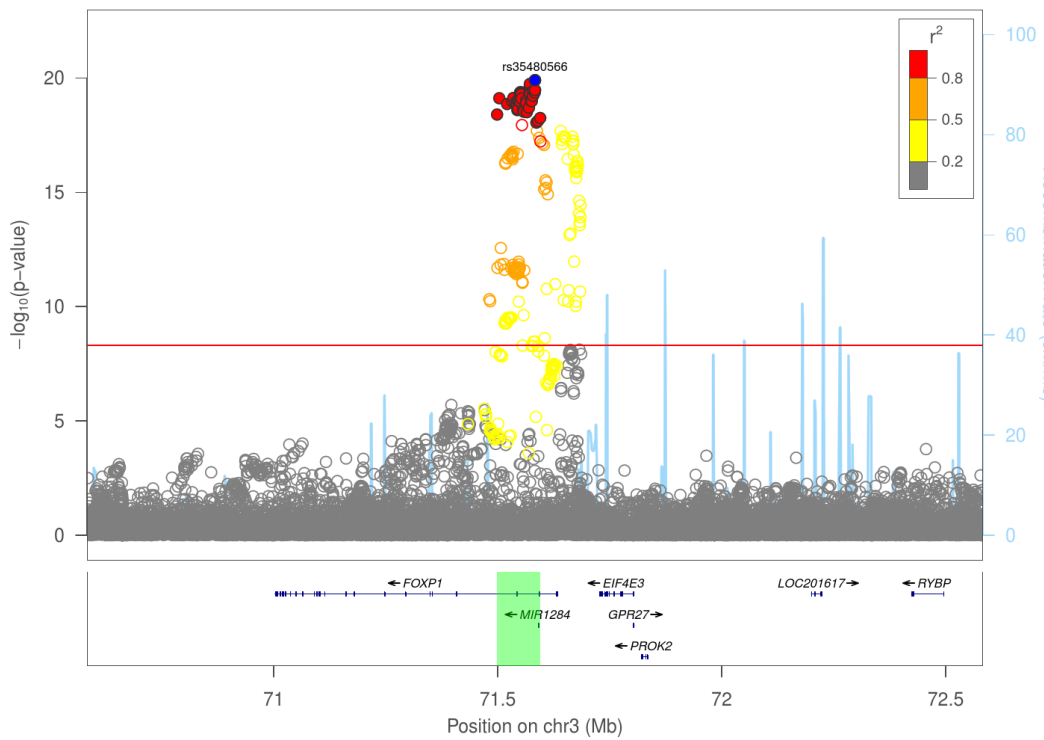

### PDZRN3-AS1, FEV<sub>1</sub>/FVC tier 1 rs586936

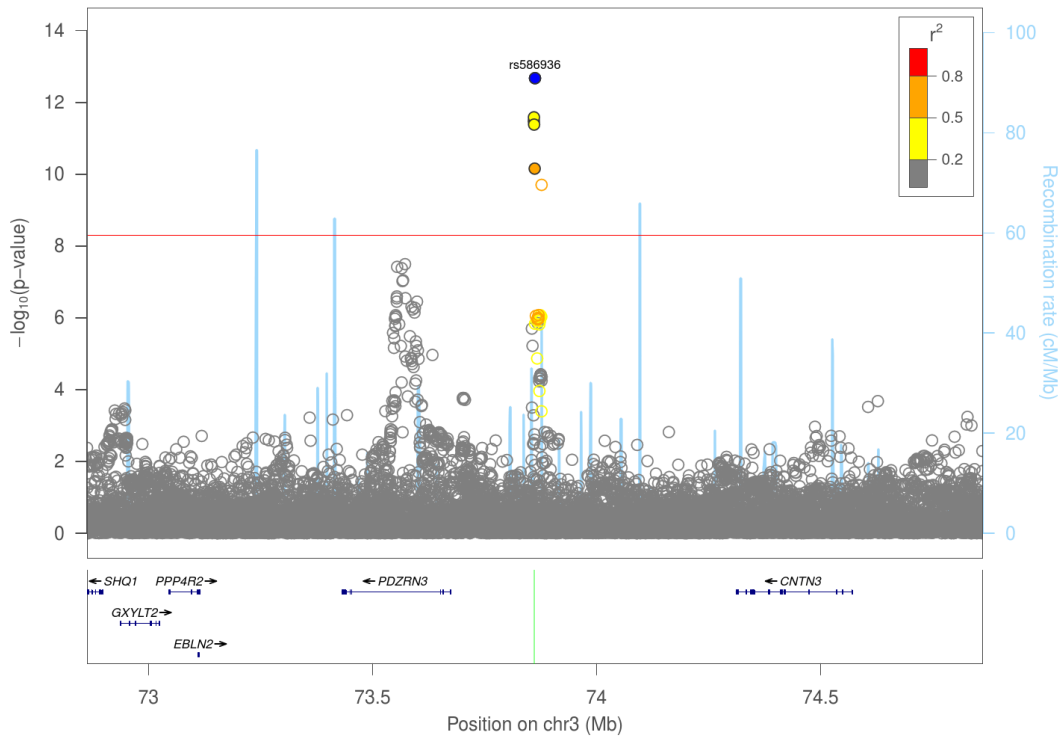

### MIR548G, FVC tier 1 rs1610265

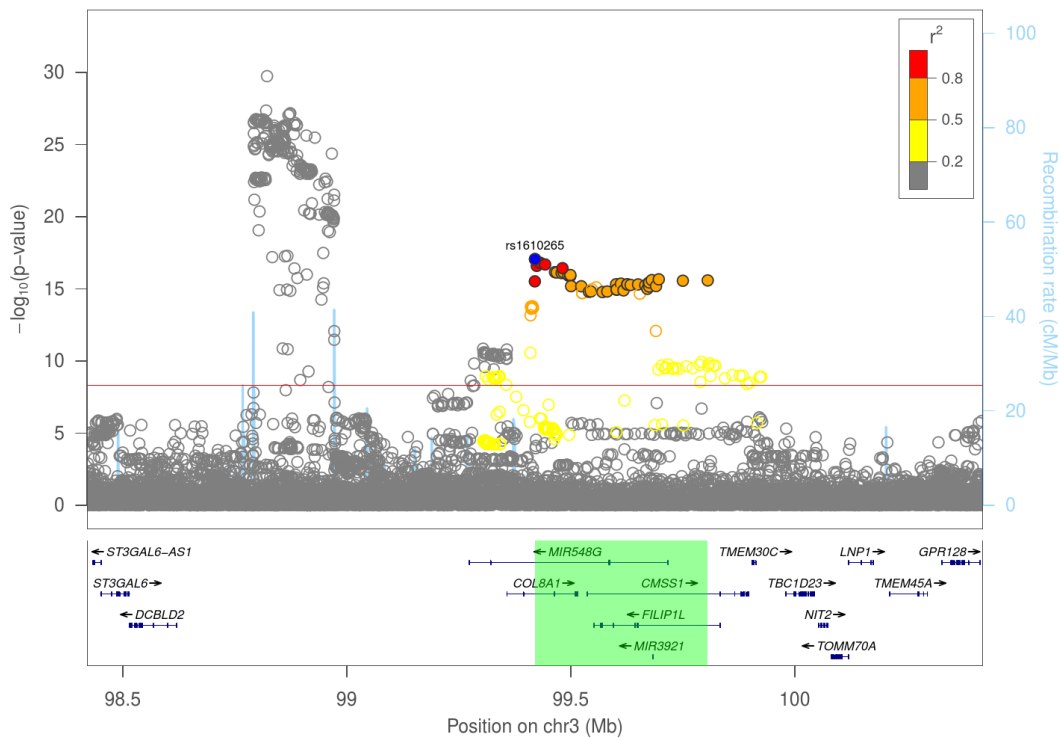

**BCHE, FEV<sub>1</sub>/FVC tier 1 rs1799807**

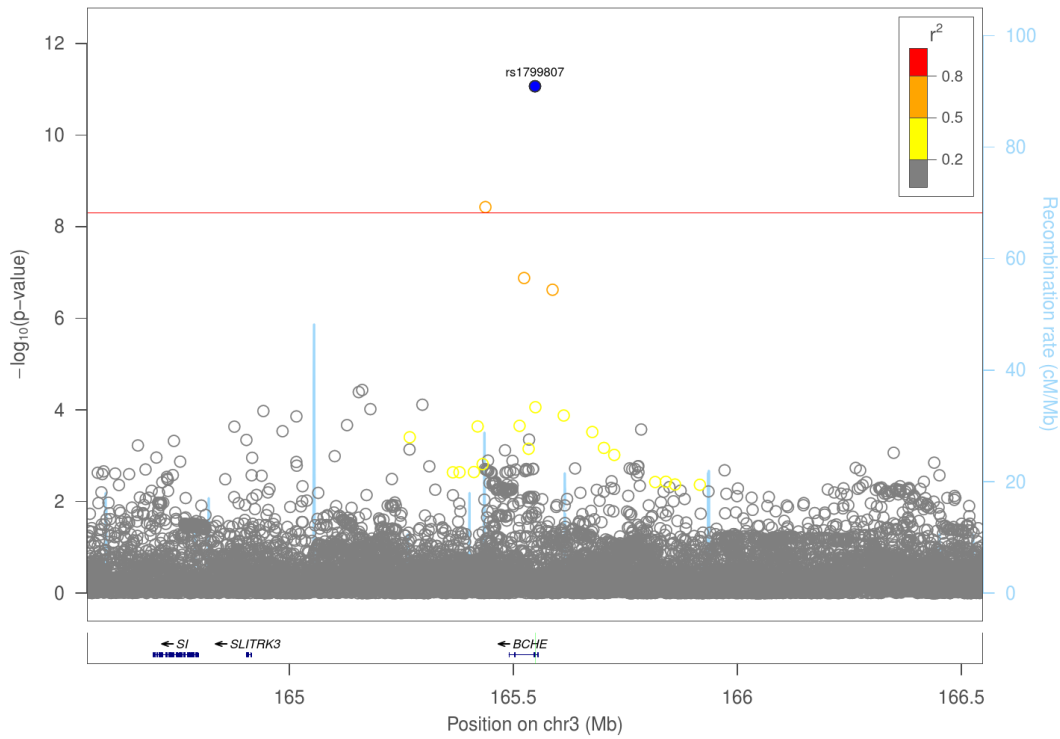

**IGF2BP2, FEV<sub>1</sub> tier 1 rs6780171**

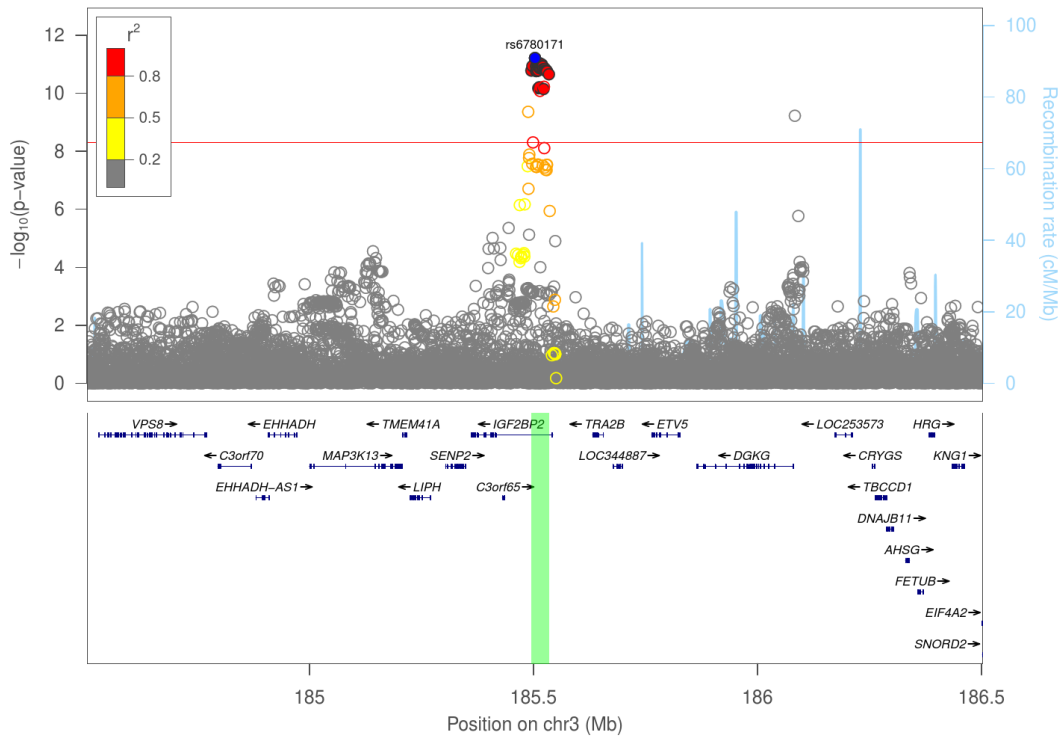

**KDR, FEV<sub>1</sub> tier 2 rs12331869**

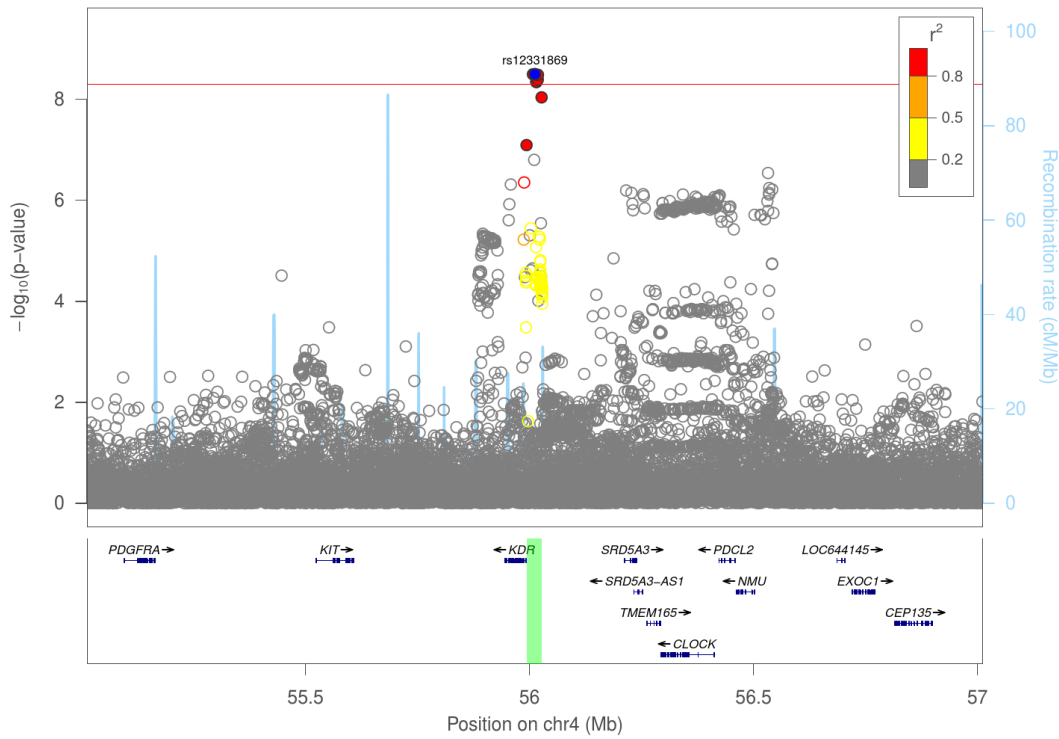

**BTC, FEV<sub>1</sub>/FVC tier 1 rs62316310**

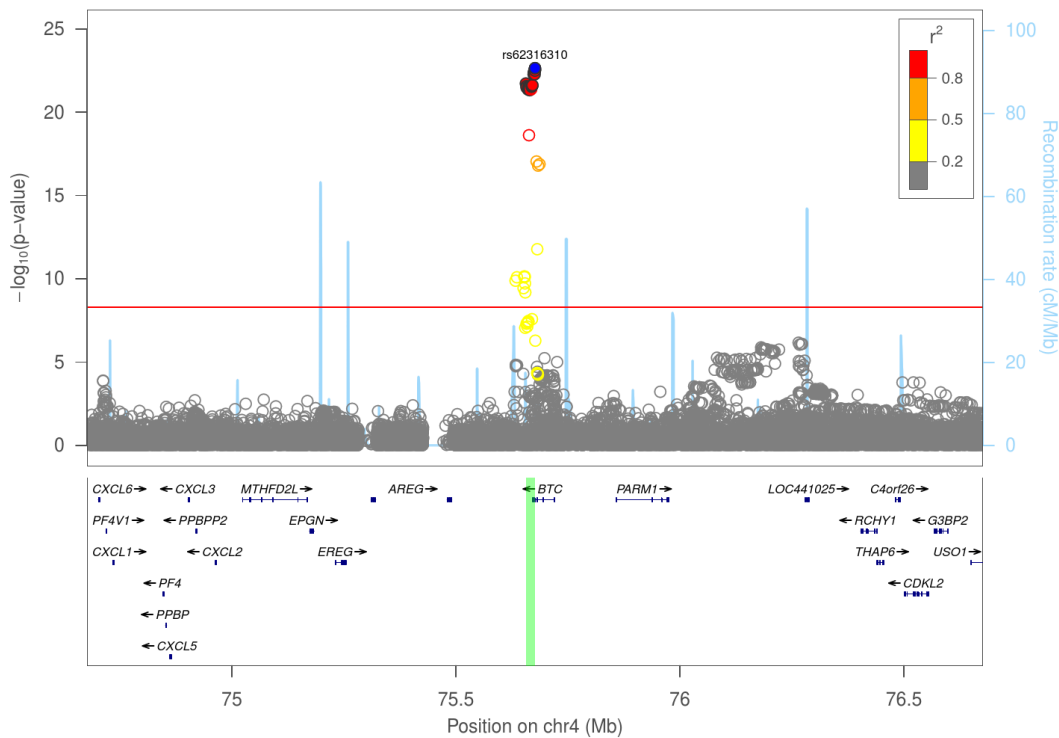

**FRAS1, FEV<sub>1</sub>/FVC tier 1 rs11098196**

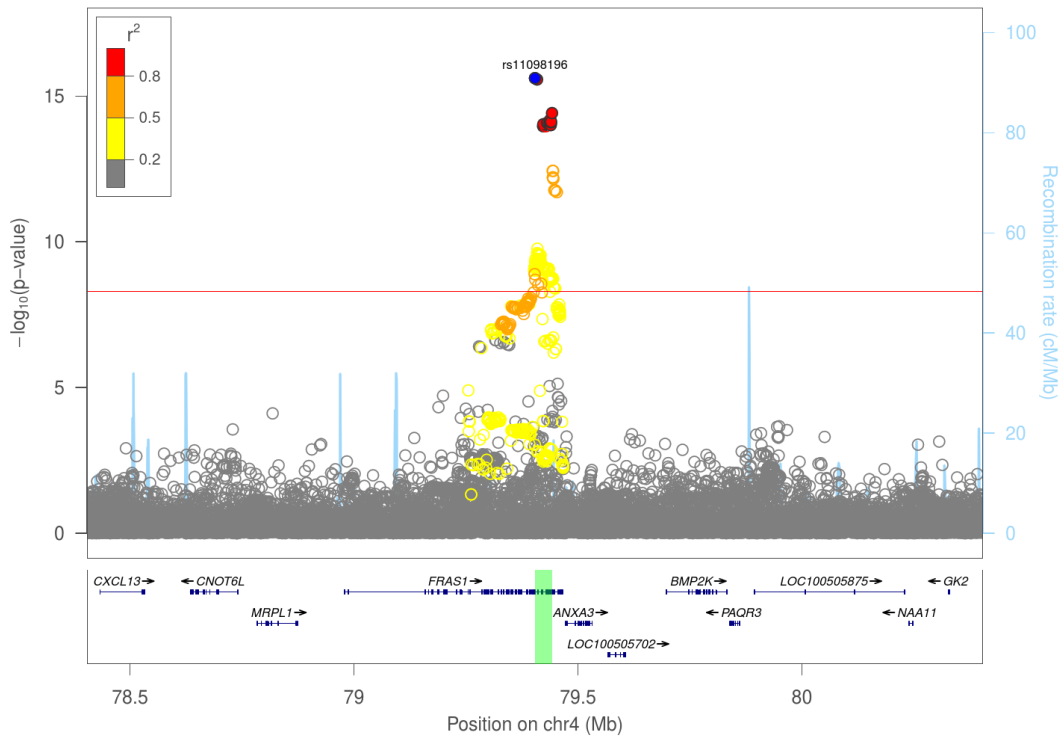

**HHIP-AS1, FVC tier 1 rs13109426**

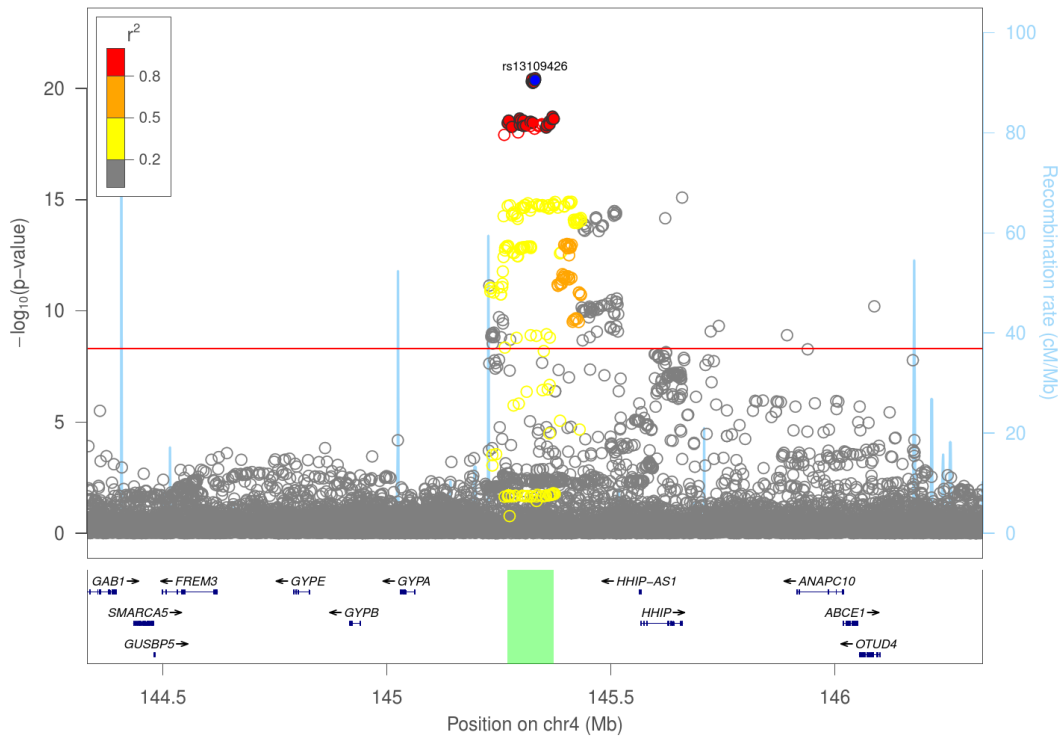

**HHIP-AS1, PEF tier 1 rs13116999**

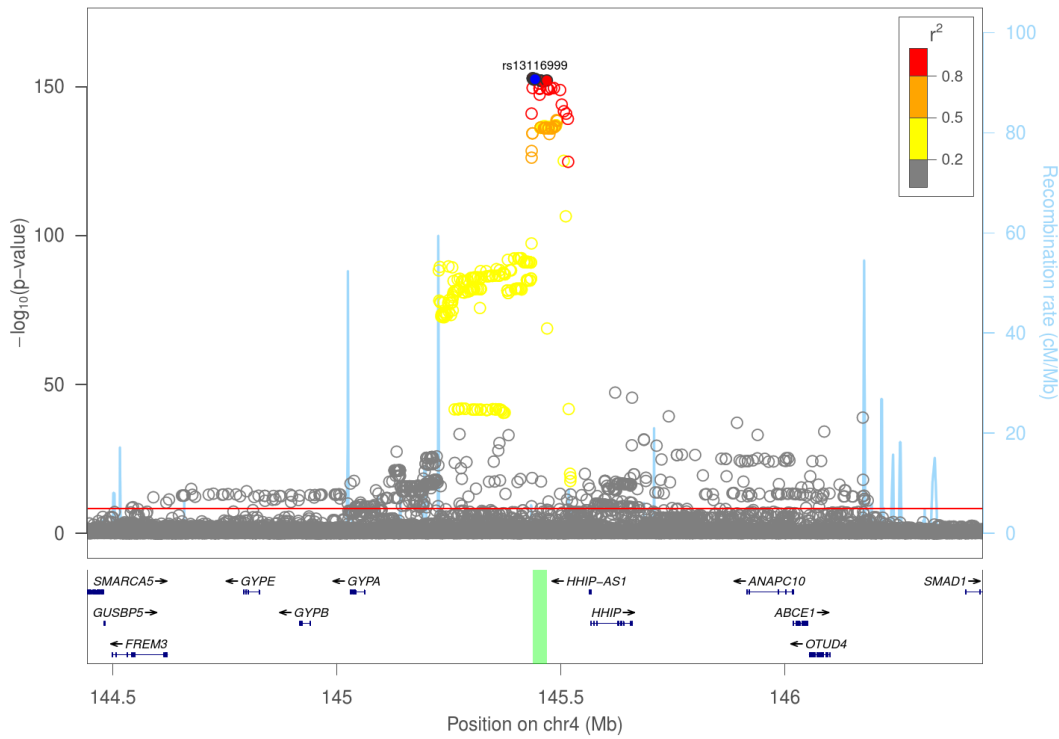

**LOC100996325, FEV<sub>1</sub> tier 1 rs11739847**

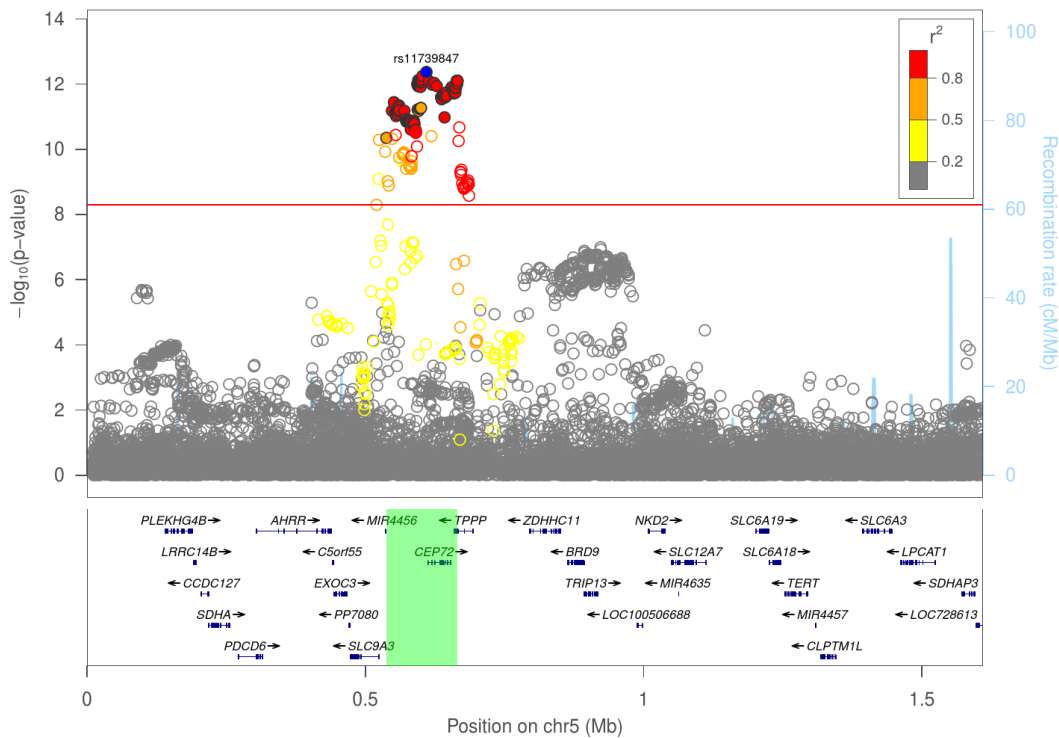

**NNT, FEV<sub>1</sub> tier 1 rs4866846**

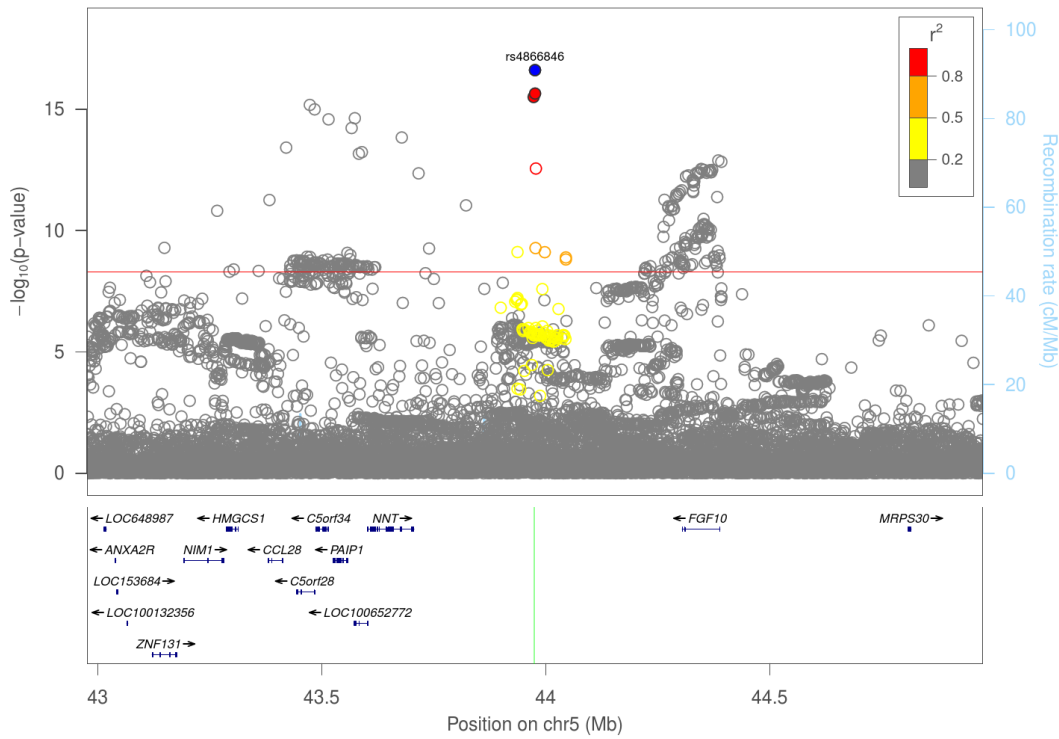

**LOX, FEV<sub>1</sub>/FVC tier 1 rs10059661**

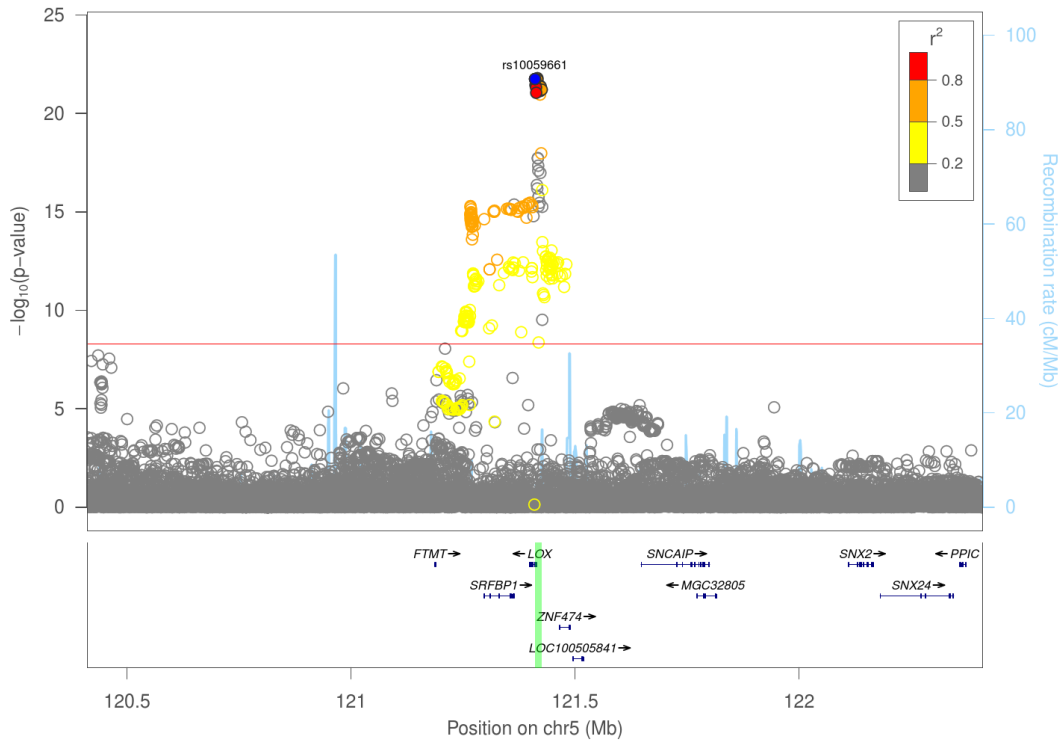

**ADAMTS19-AS1, FEV<sub>1</sub>/FVC tier 1 rs17163397**

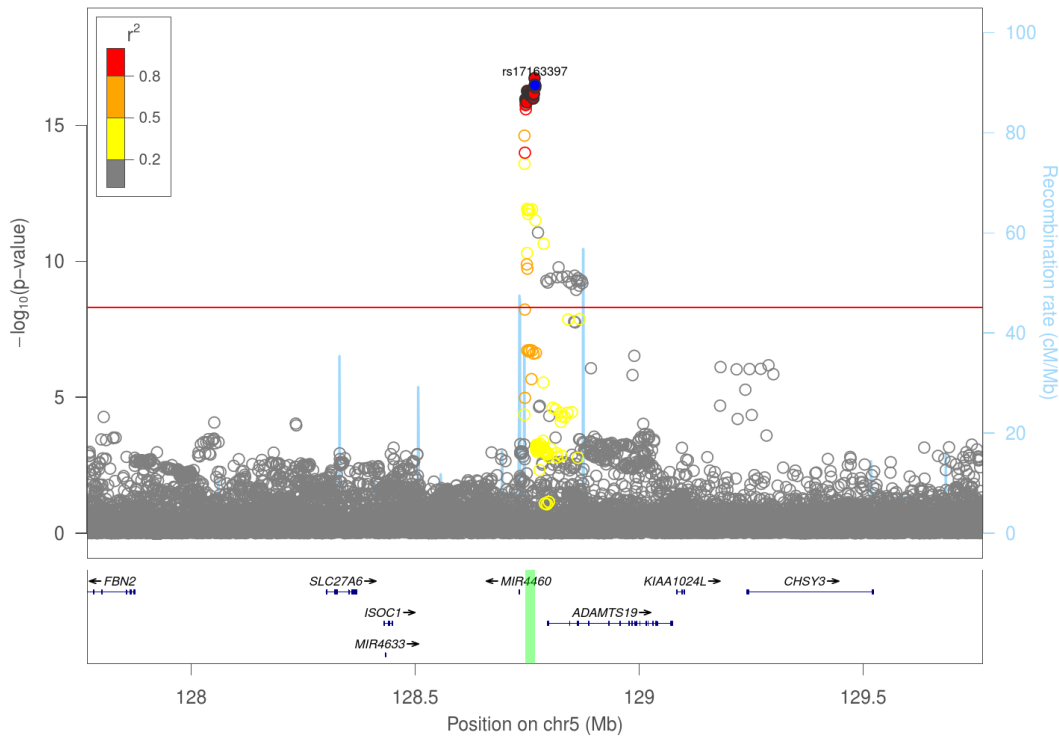

**ADRB2, FEV<sub>1</sub> tier 1 rs1800888**

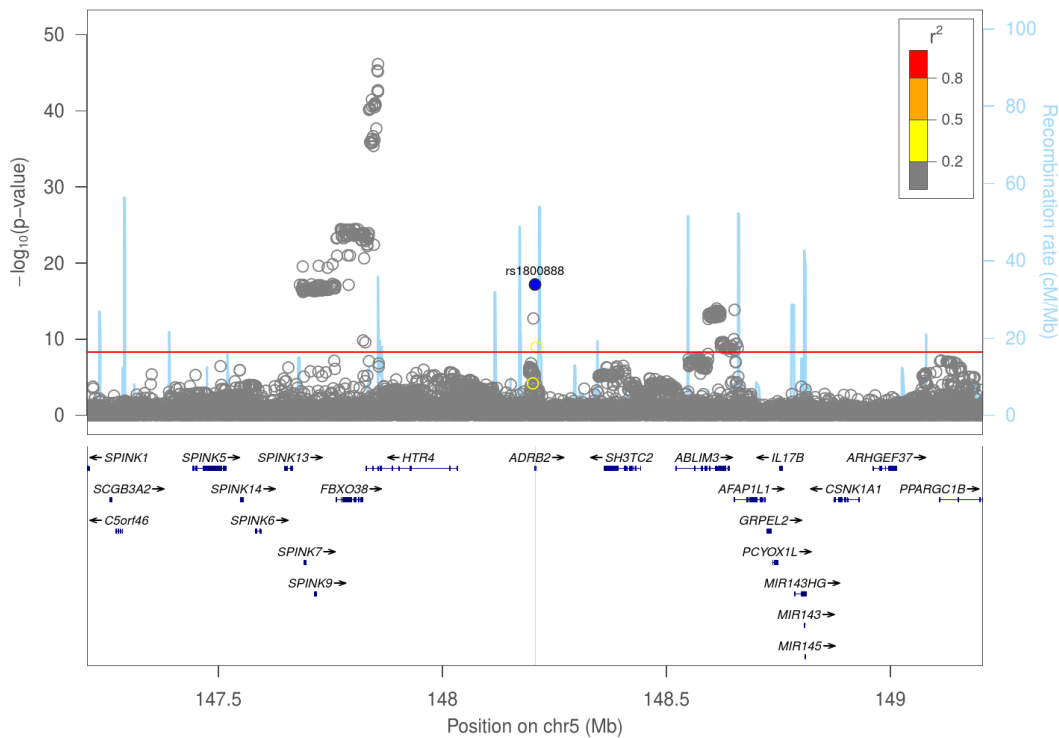



**FGF18, FEV<sub>1</sub>/FVC tier 1 rs10059996**

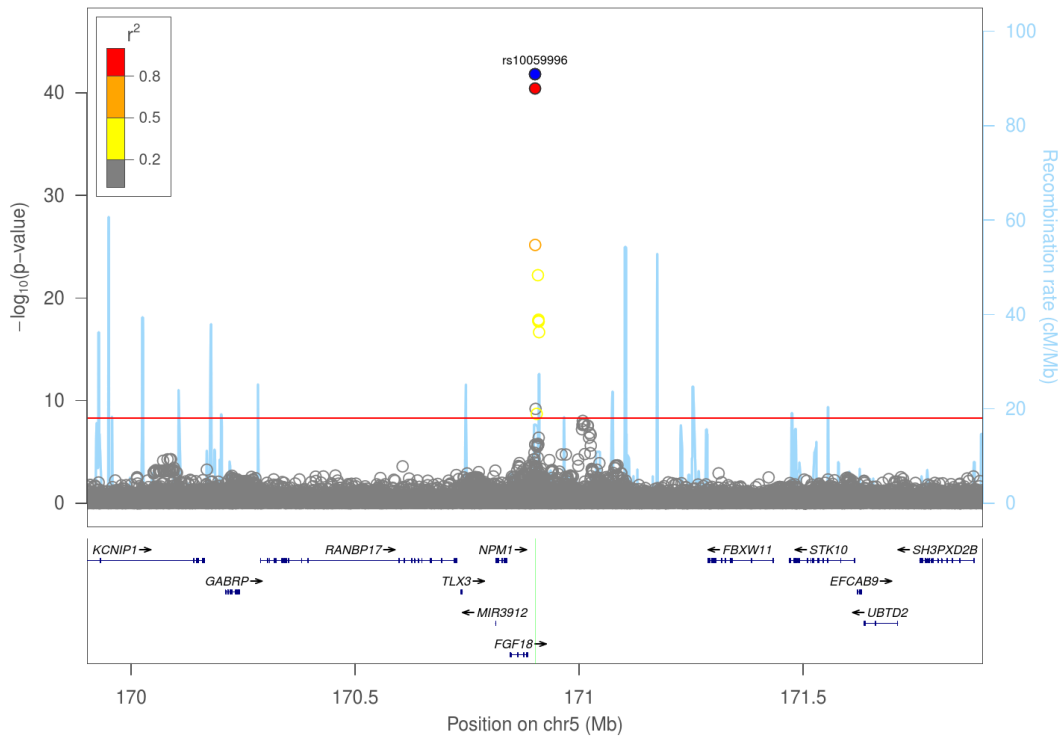

**RASGEF1C, FEV<sub>1</sub>/FVC tier 1 rs79898473**

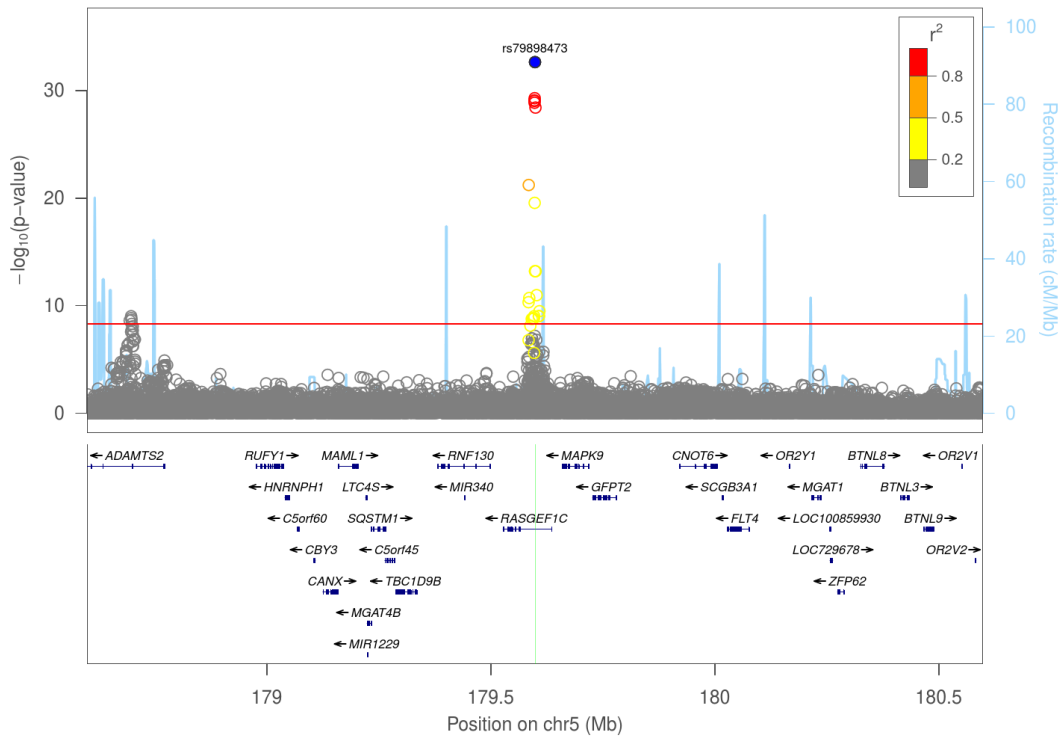

**BMP6, FVC tier 1 rs12198986**

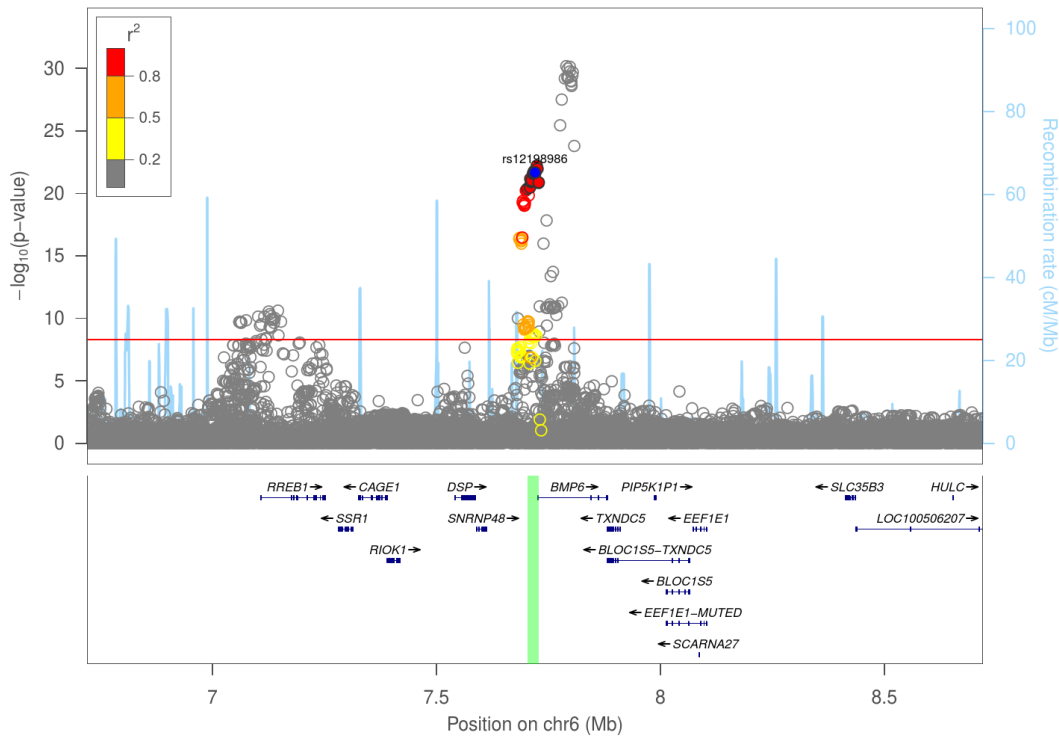

**HMGA1, FVC tier 1 rs9689096**

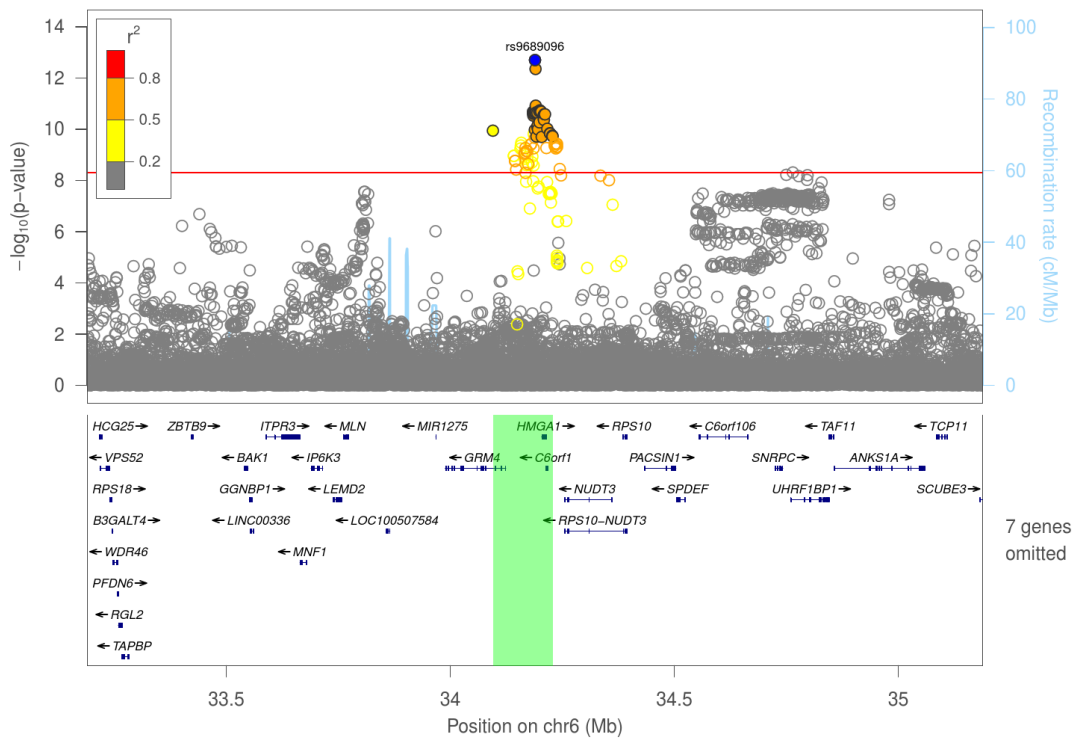

**CDC5L, FVC tier 2 rs9357446**

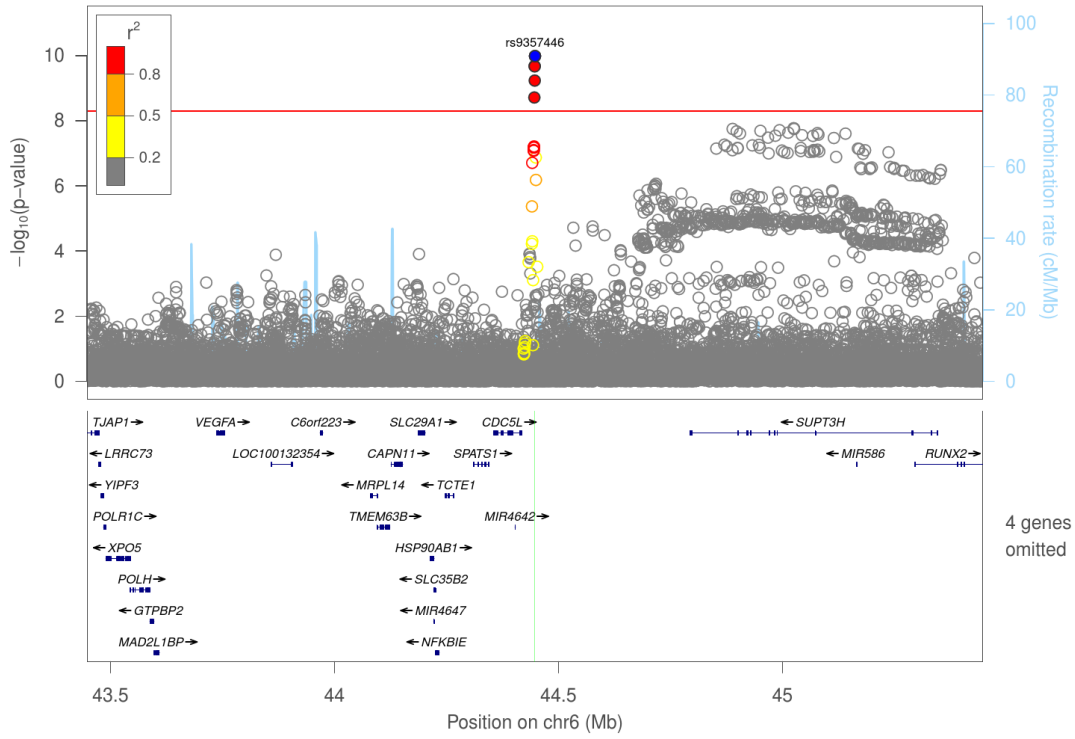

**RUNX2, FEV<sub>1</sub>/FVC tier 1 rs12202314**

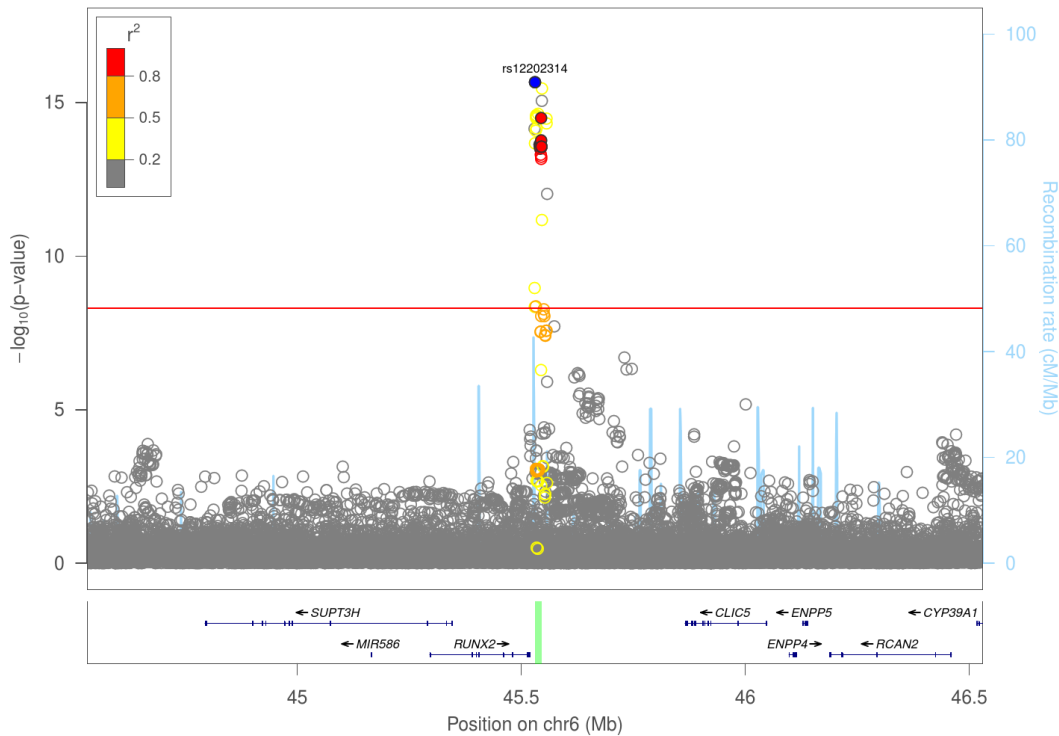

***RUNX2*, *FVC* tier 2 rs9472541**

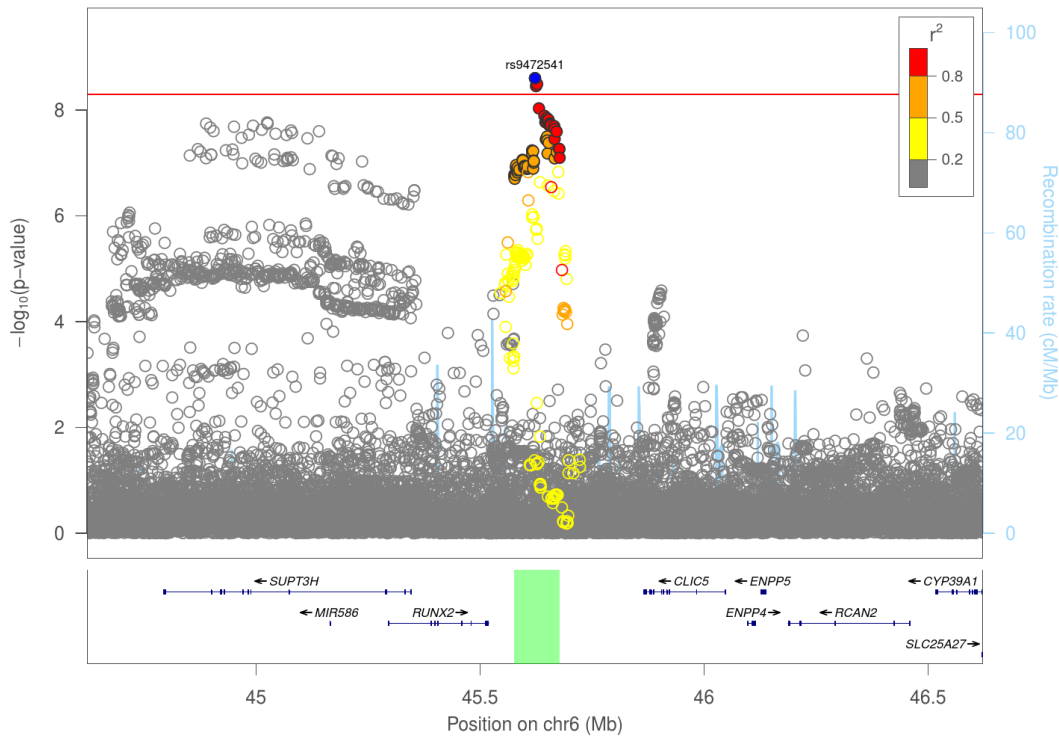

***RNU6-71P*, *FEV*<sub>1</sub> tier 1 rs2894837**

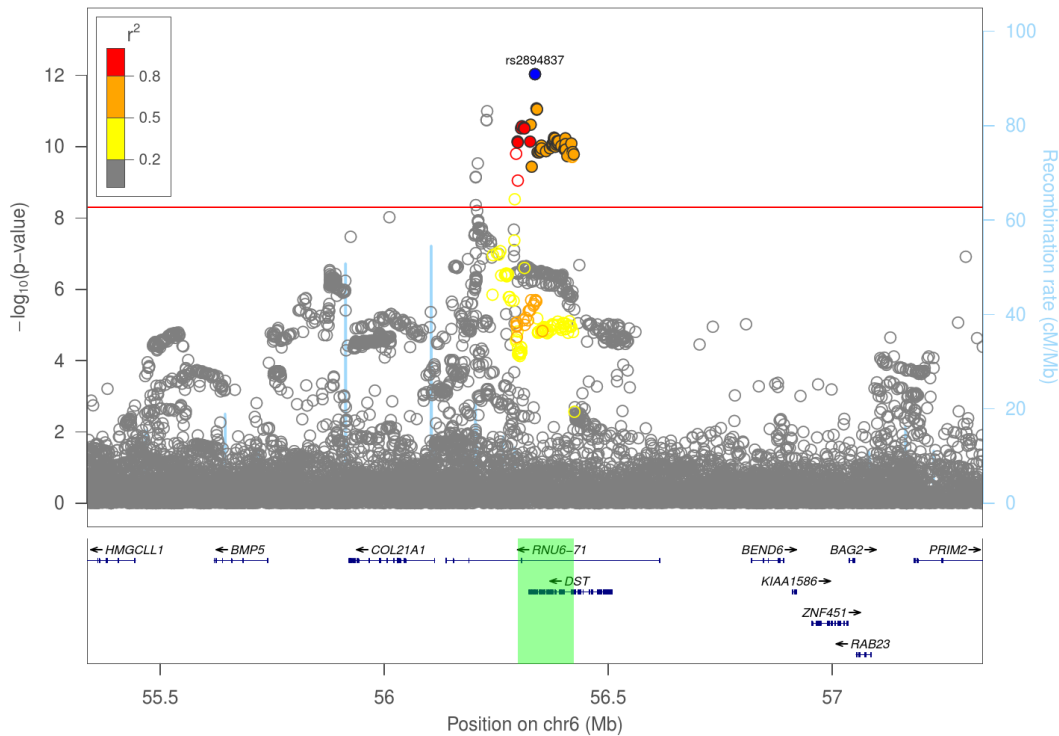

**SLC2A12, FEV<sub>1</sub> tier 2 rs2627237**

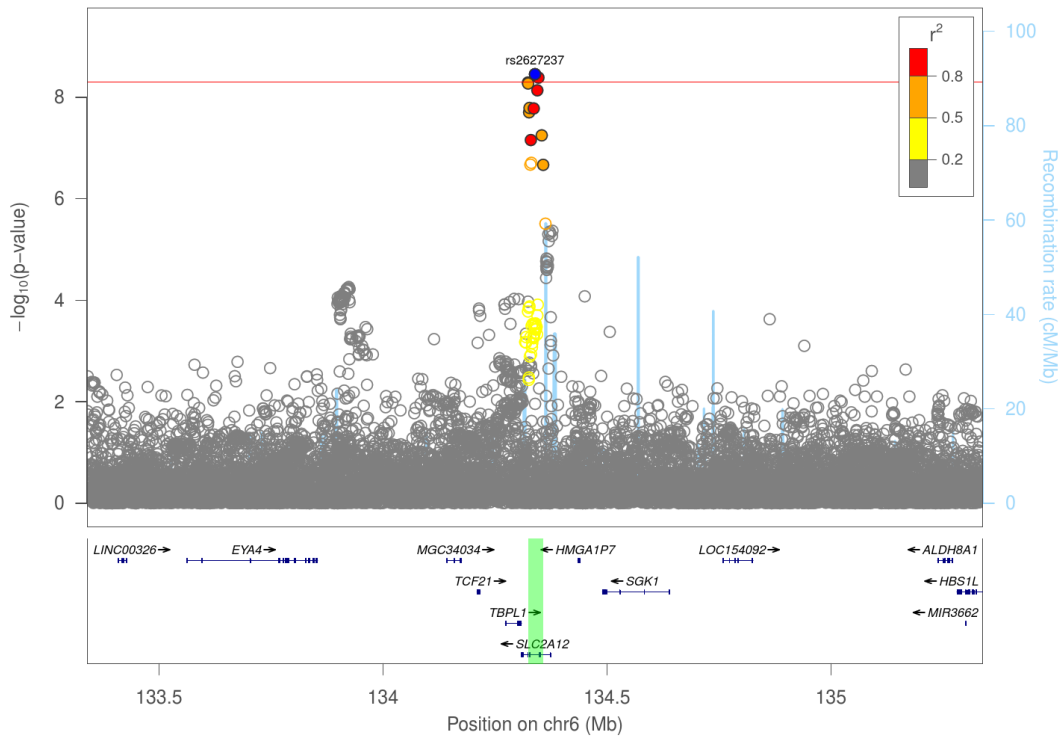

**LOC100507477, FEV<sub>1</sub> tier 1 rs1102077**

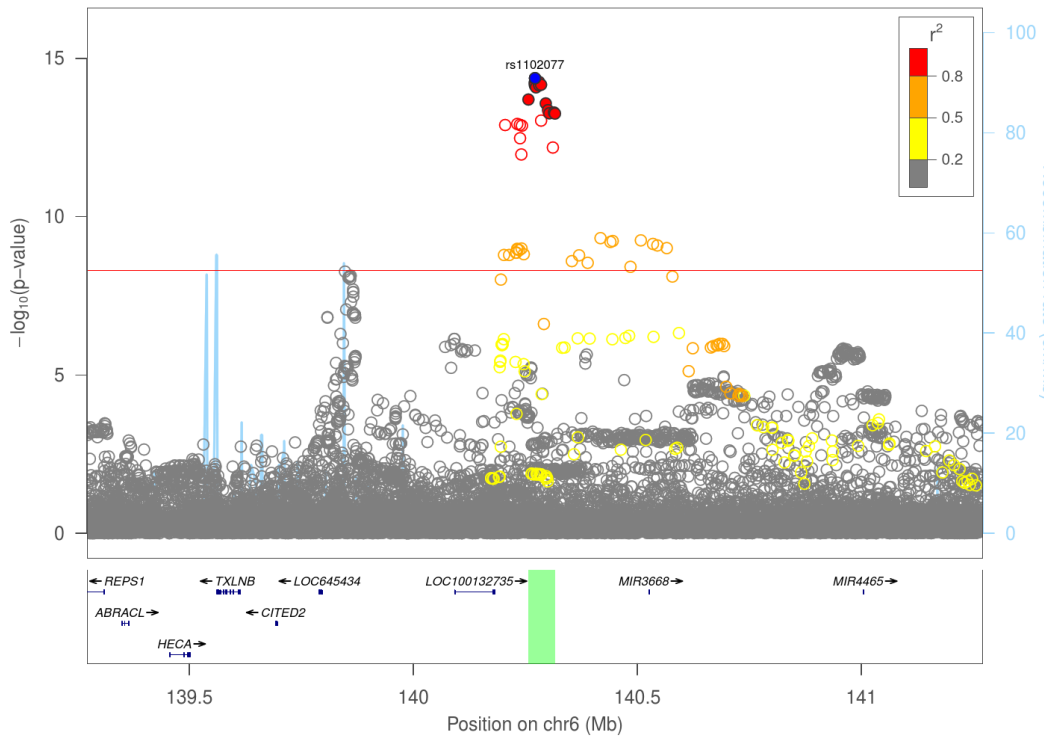

**VTA1, FEV<sub>1</sub> tier 1 rs9385988**

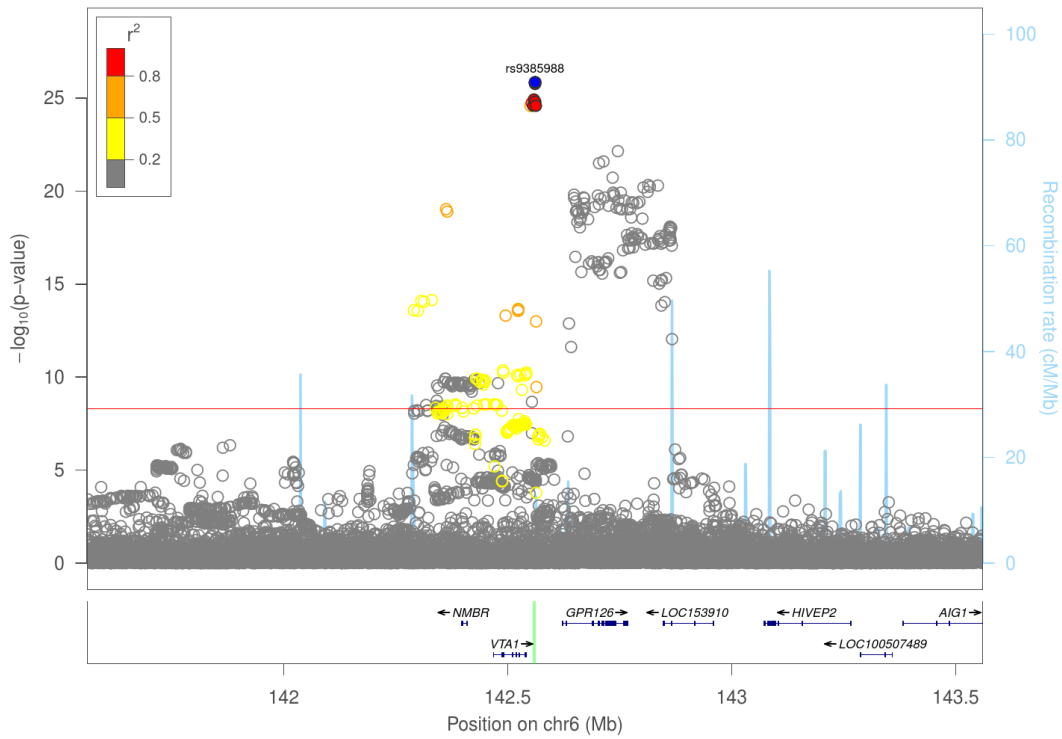

**MEOX2-AS1, FEV<sub>1</sub>/FVC tier 1 rs4721457**

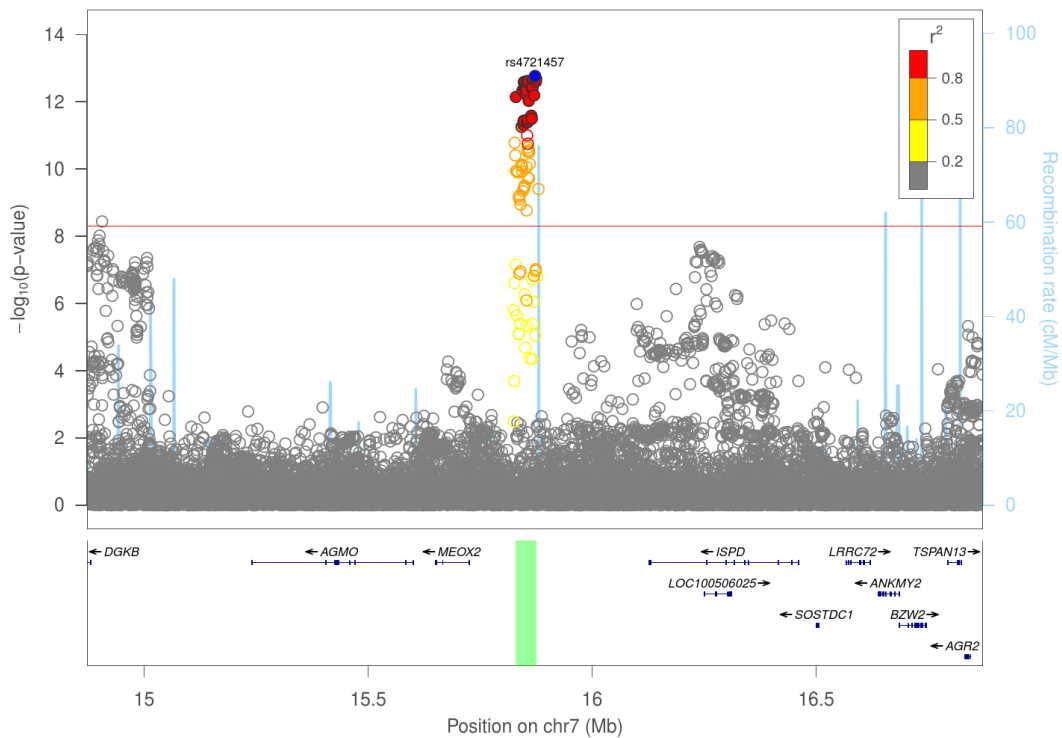

**SKAP2, FEV<sub>1</sub> tier 1 rs559233**

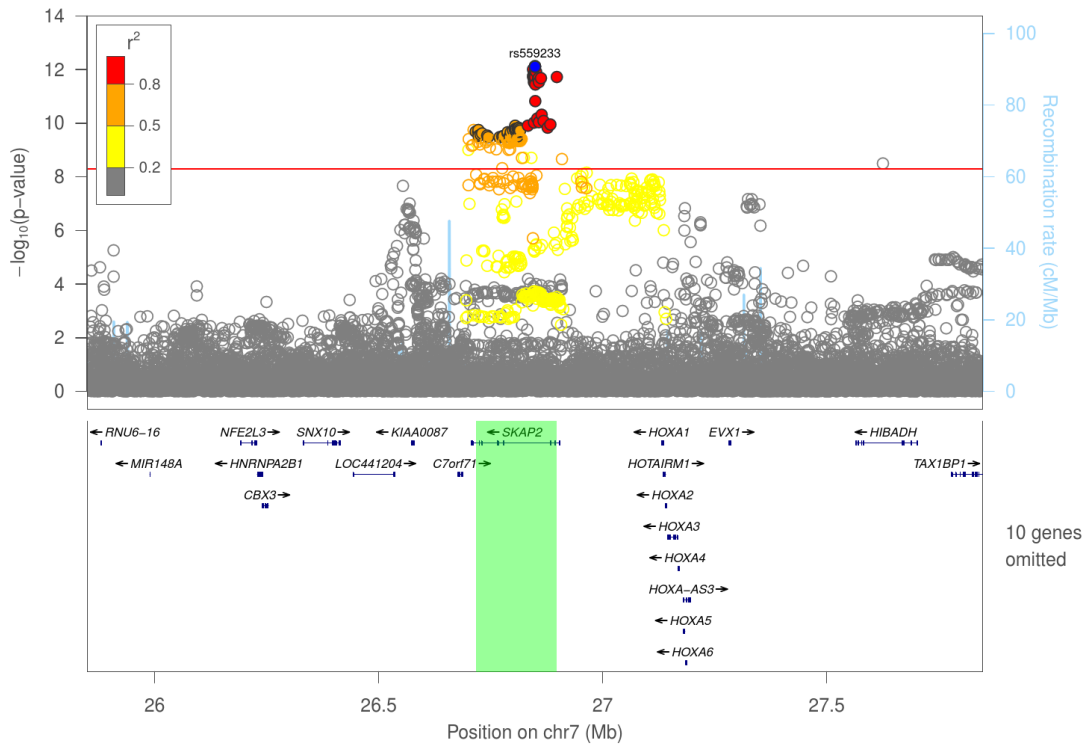

**HOXA-AS3, FVC tier 2 rs62454414**

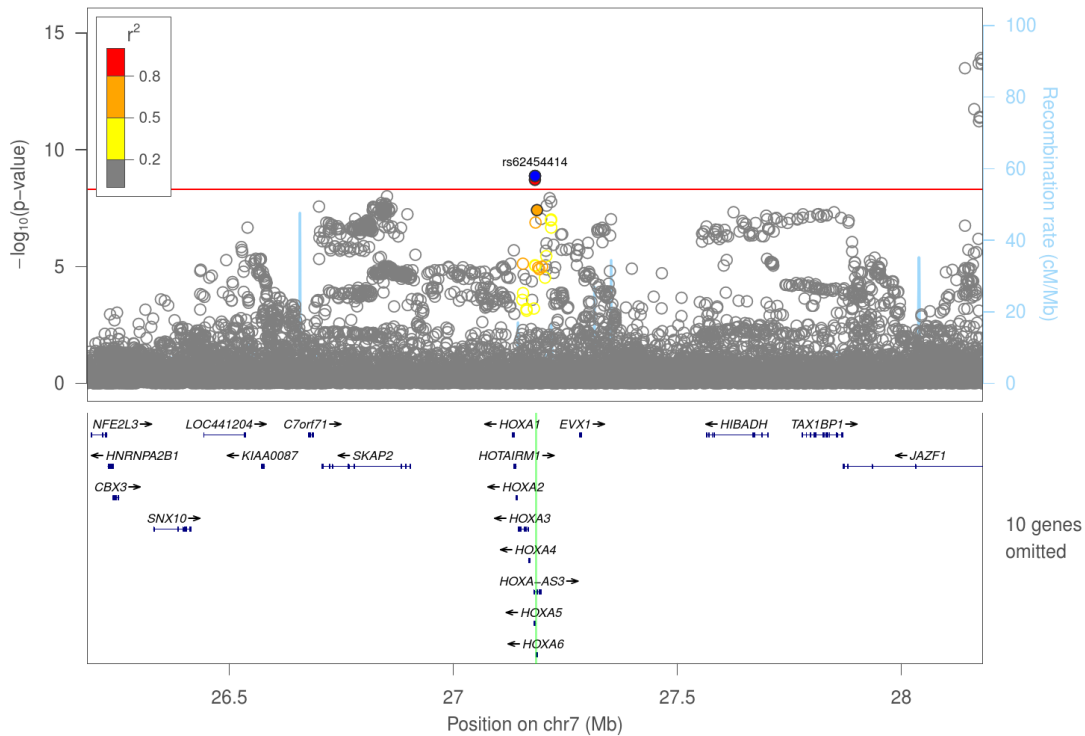

**JAZF1, FEV<sub>1</sub> tier 1 rs1513272**

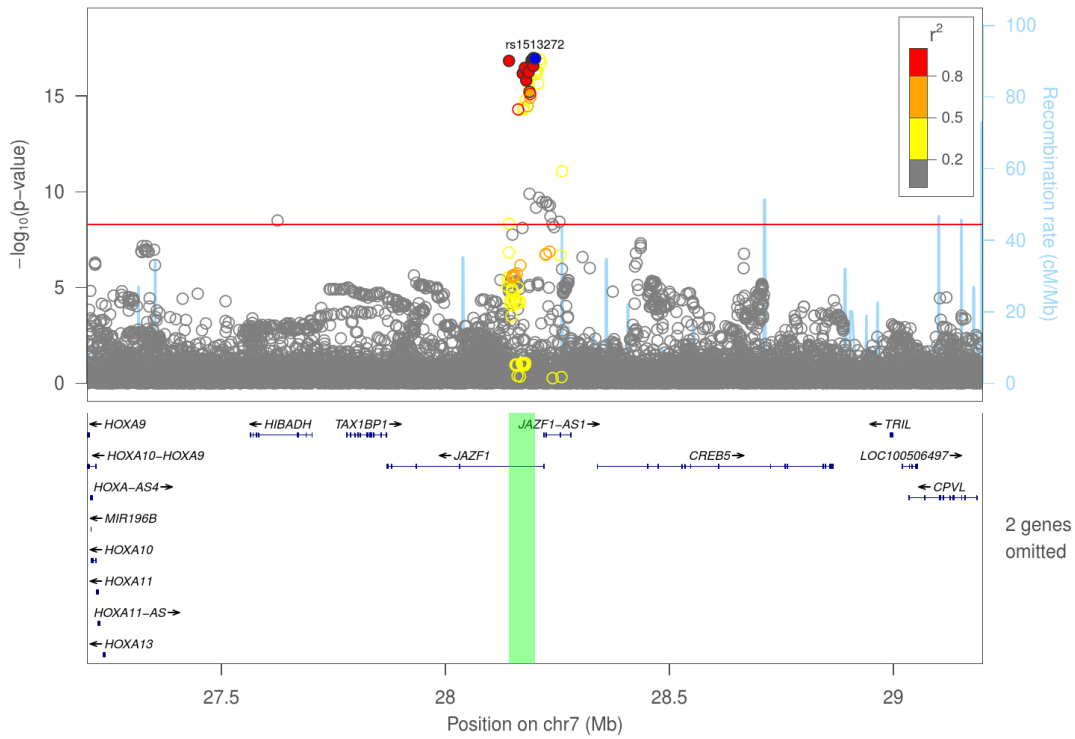

**IGFBP3, FVC tier 1 rs17232687**

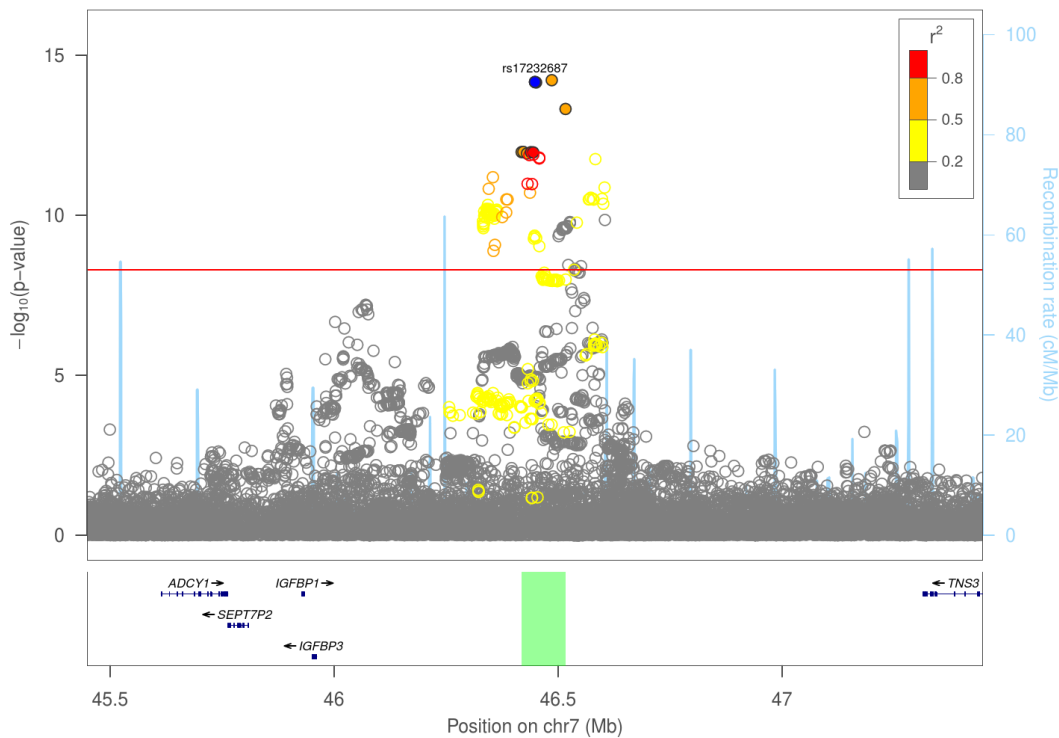



***SEMA3D*, *FEV*<sub>1</sub> tier 1 rs12707691**

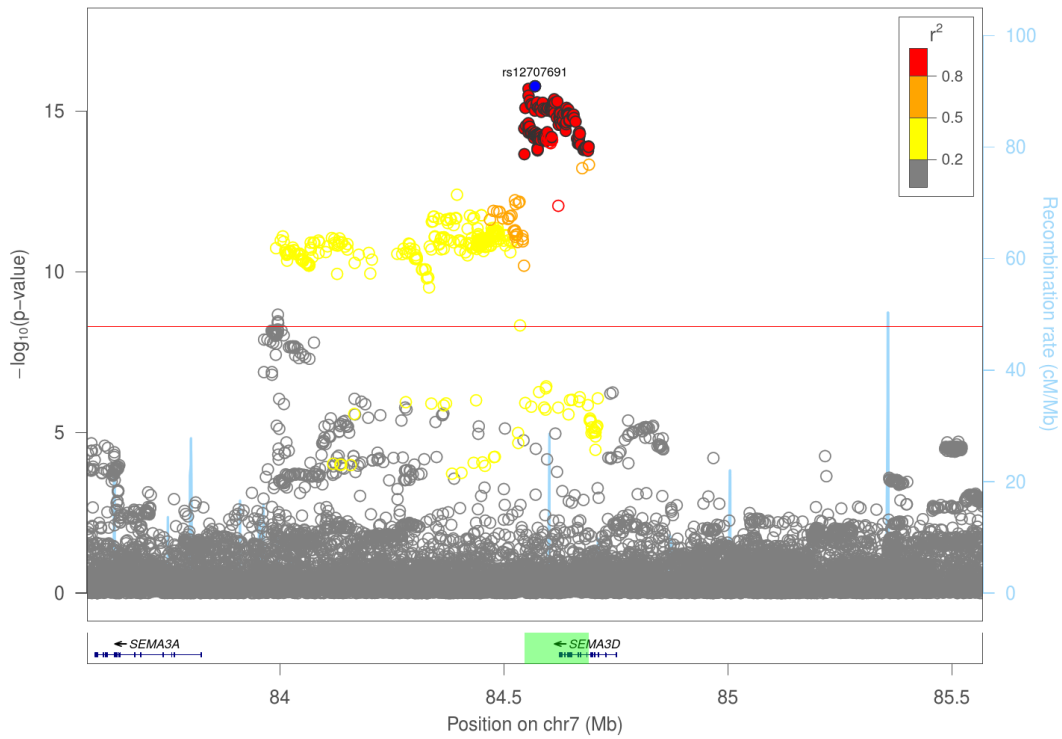

***MET*, *FEV*<sub>1</sub>/*FVC* tier 2 rs193686**

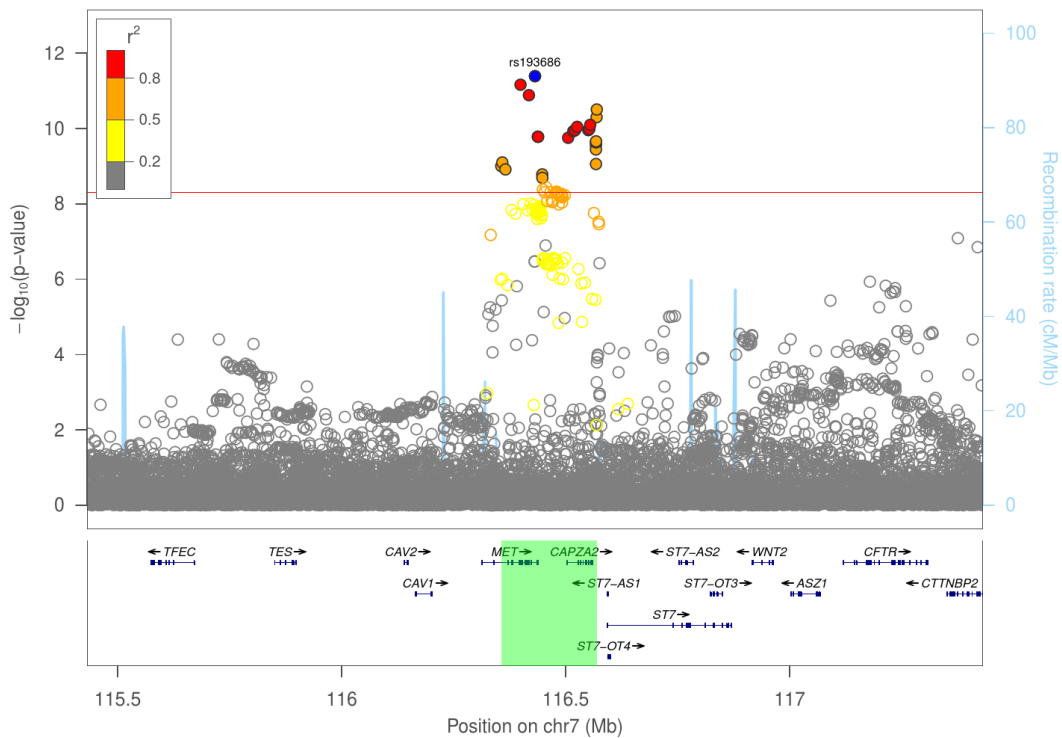

**PPP1R3B, FEV<sub>1</sub>/FVC tier 1 rs330939**

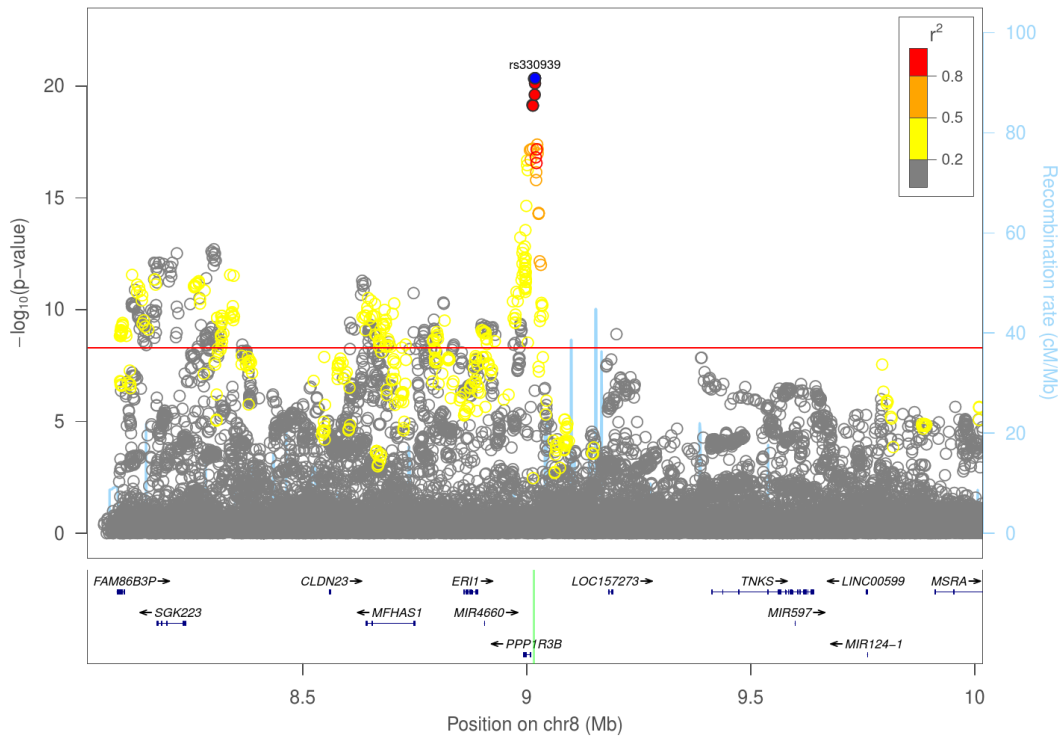

**DEFB136, FEV<sub>1</sub> tier 2 rs4128298**

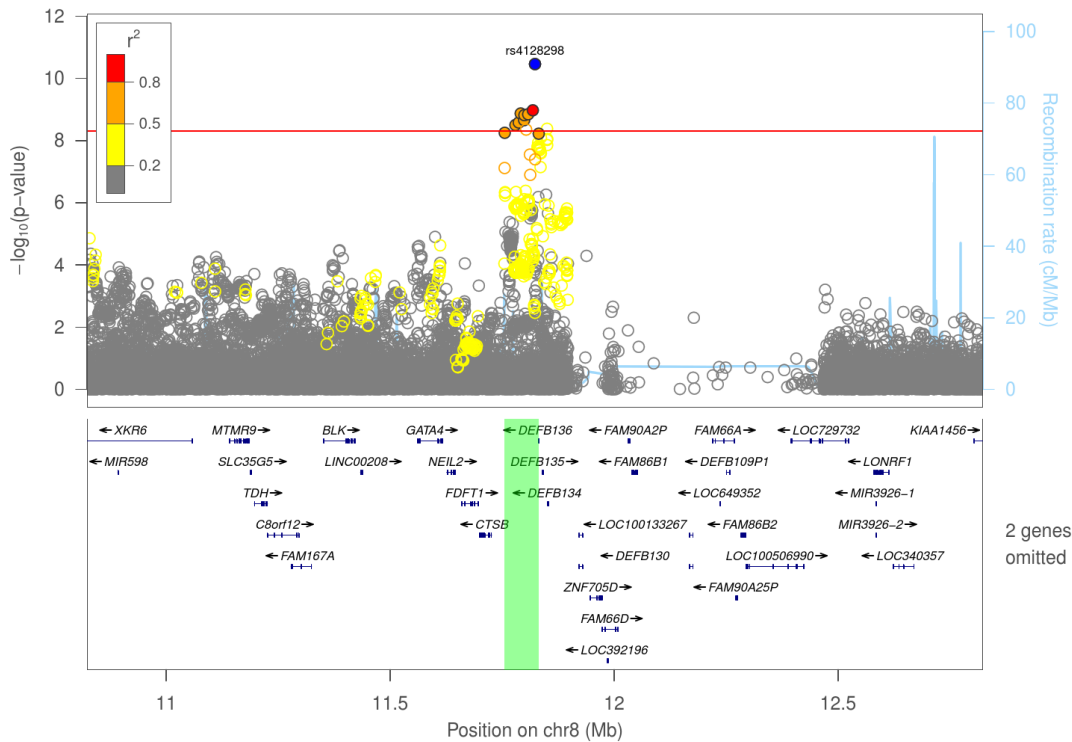

**LOC100505739, FEV<sub>1</sub> tier 1 rs7465401**

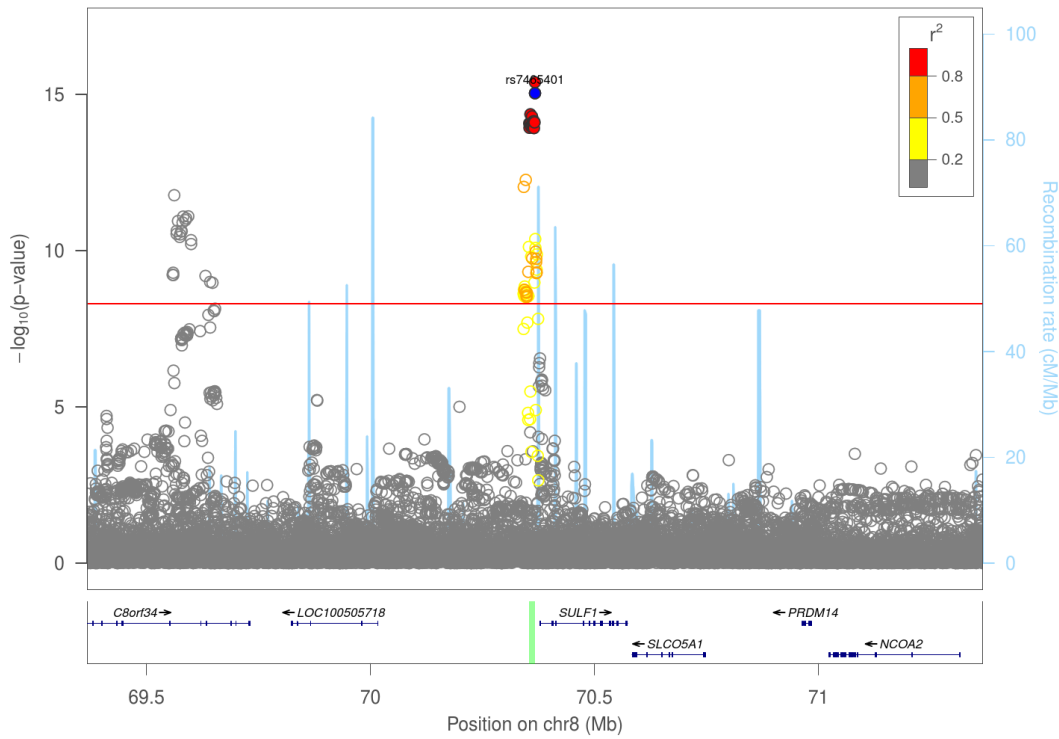

**BOP1, FVC tier 1 rs7838717**

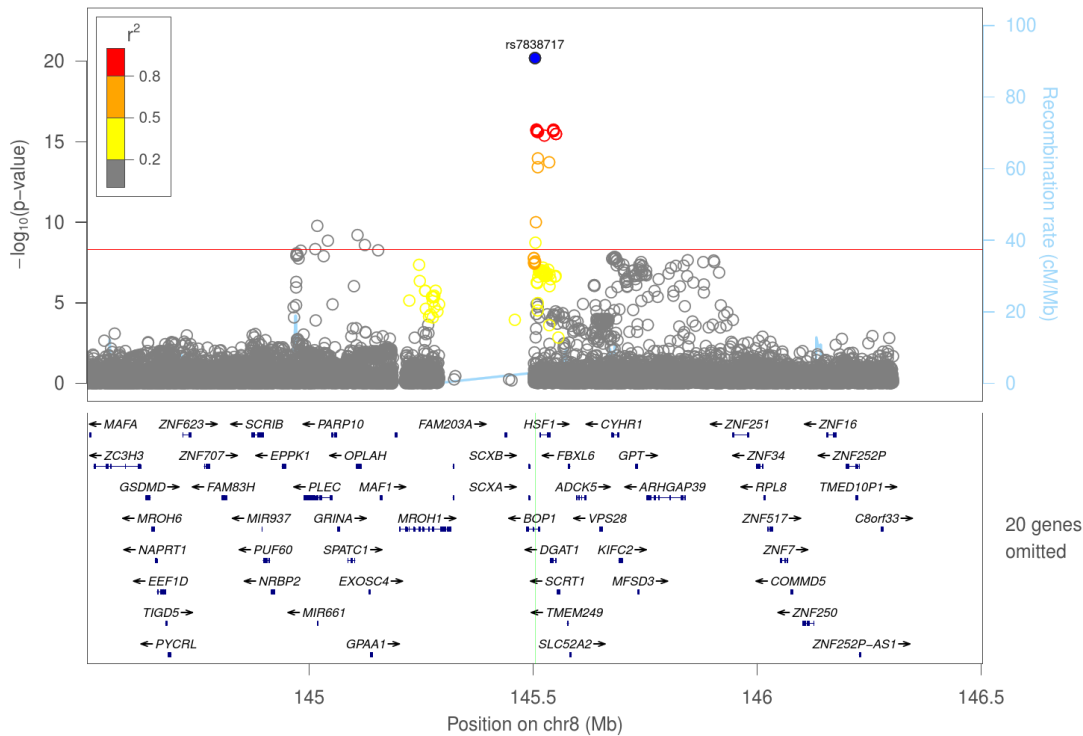

**SH3GL2, FEV<sub>1</sub> tier 1 rs7041139**

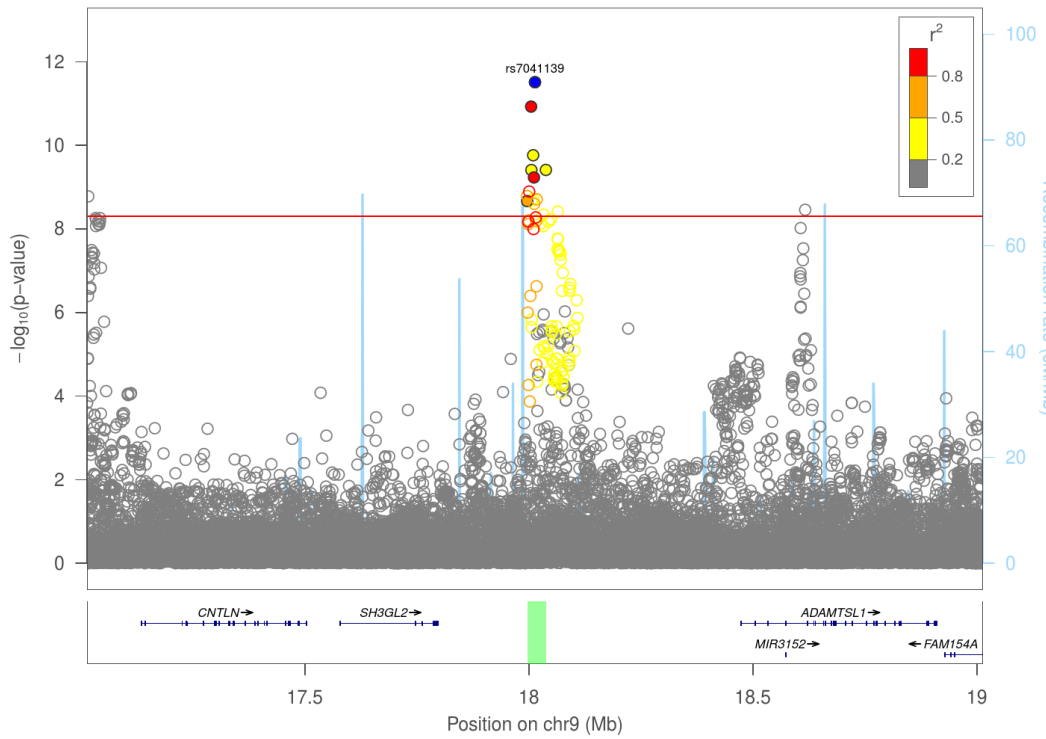

**LOC158434, FEV<sub>1</sub>/FVC tier 1 rs72743974**

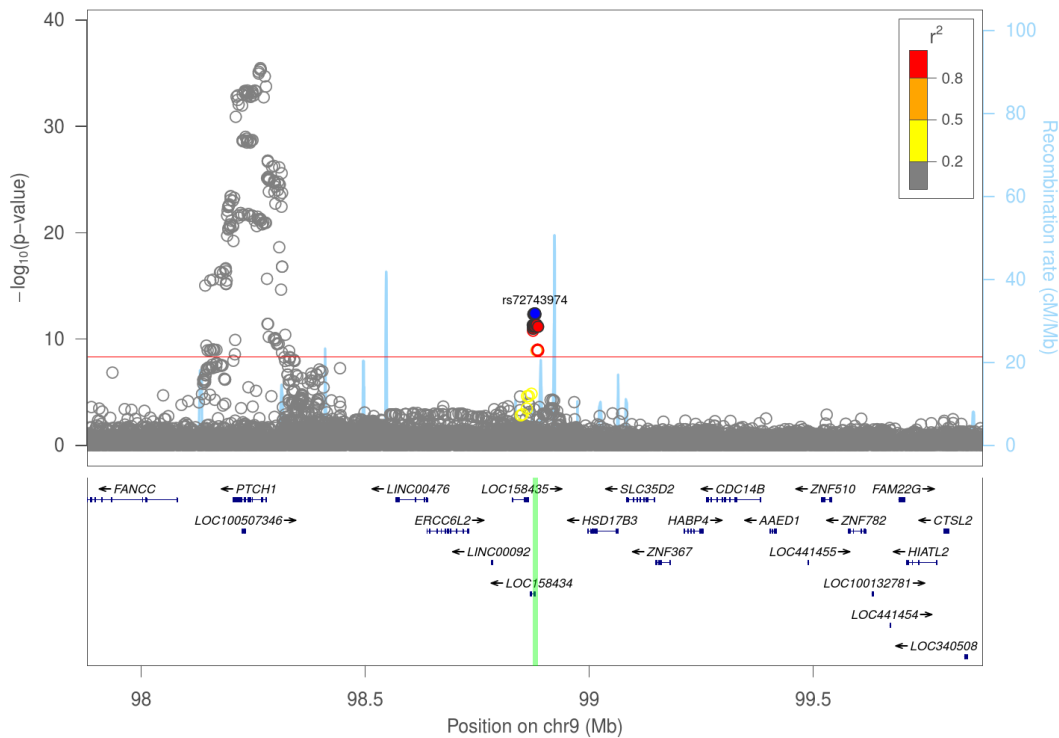

***GALNT12*, *FEV*<sub>1</sub>/FVC tier 1 rs57649467**

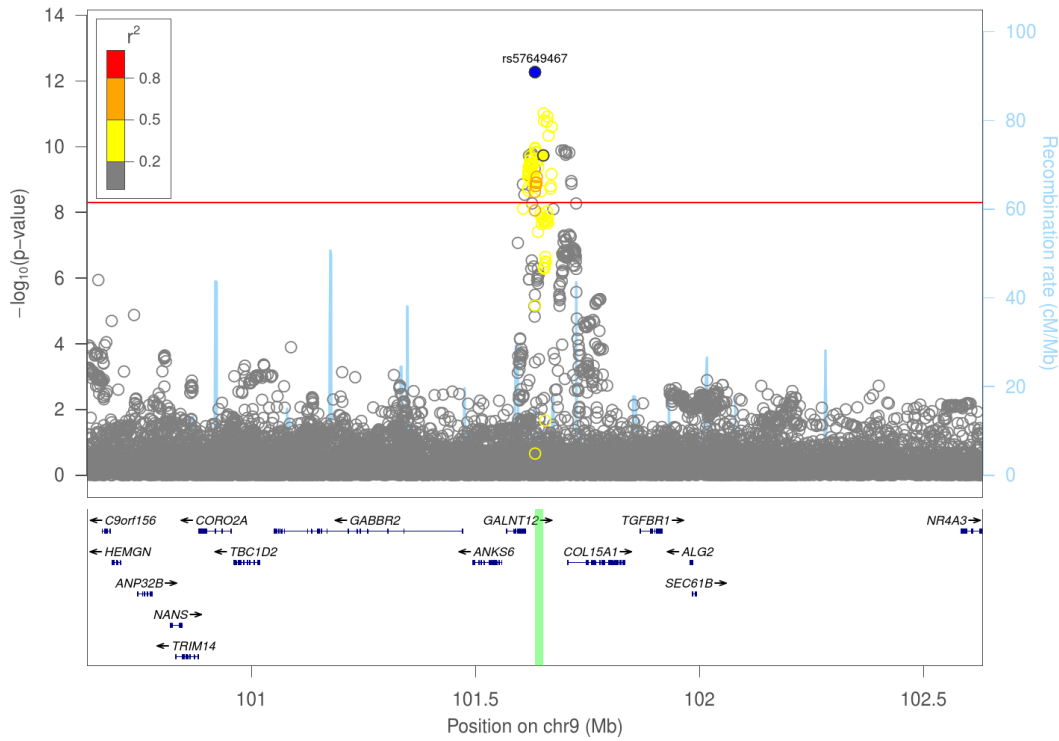

***IER5L*, *FEV*<sub>1</sub> tier 2 rs967497**

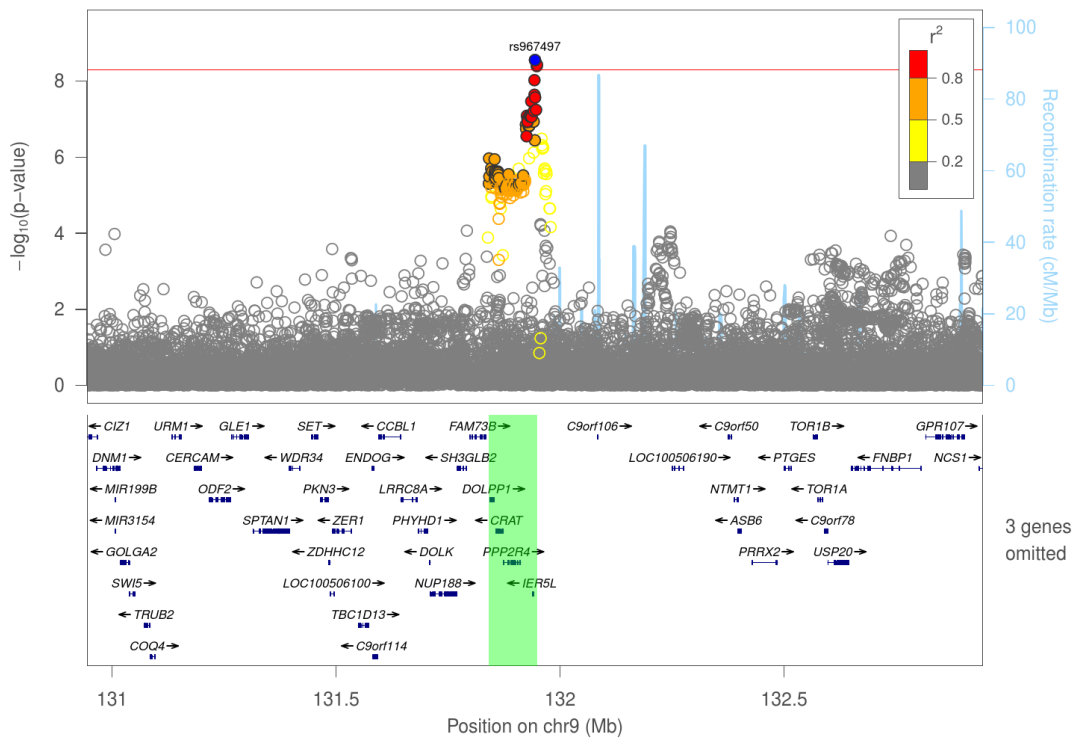

**PARD3, FEV<sub>1</sub>/FVC tier 1 rs1274475**

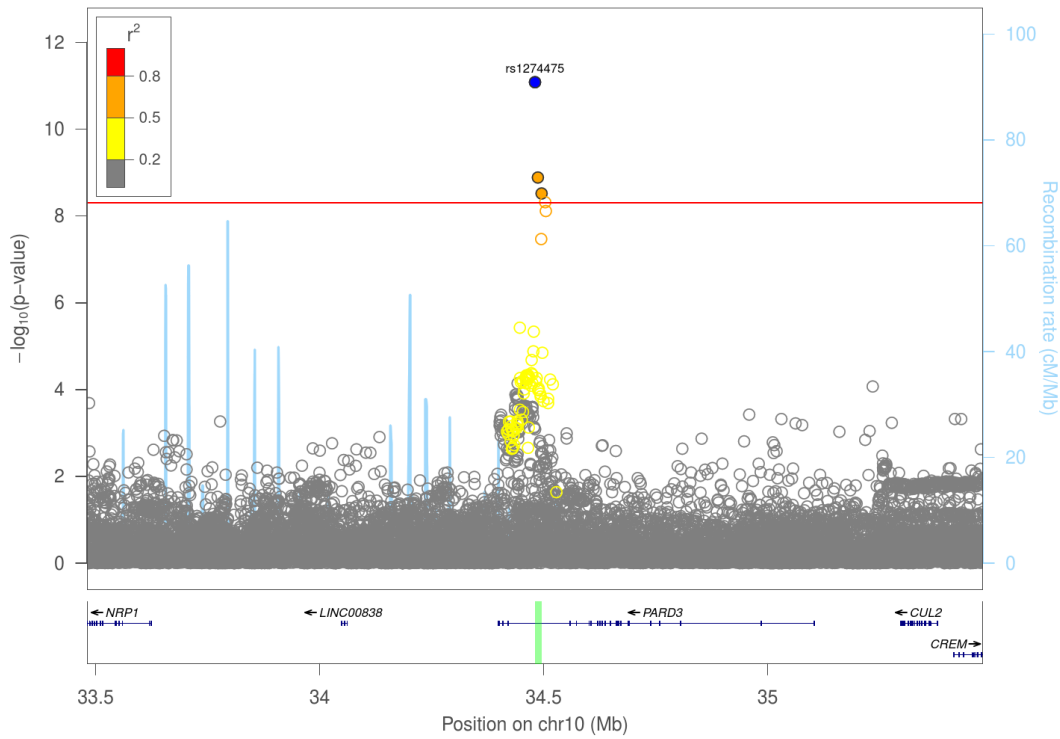

**CAMK2G, PEF tier 2 rs60820984**

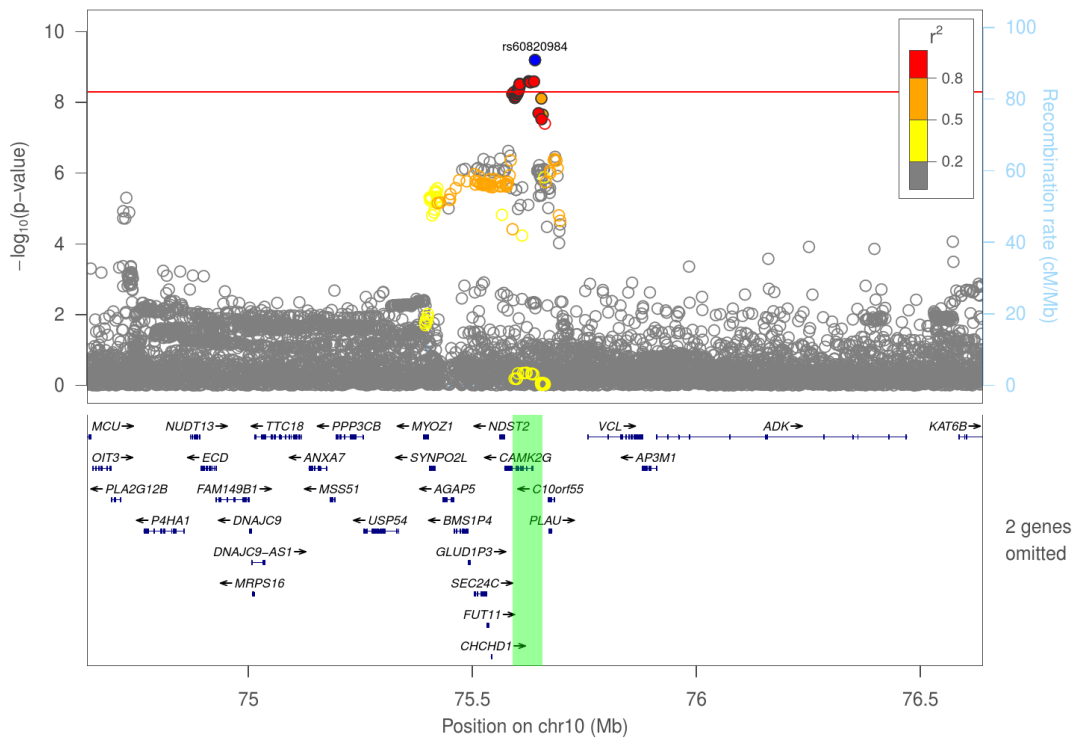

### OBFC1, FEV<sub>1</sub> tier 1 rs11191841

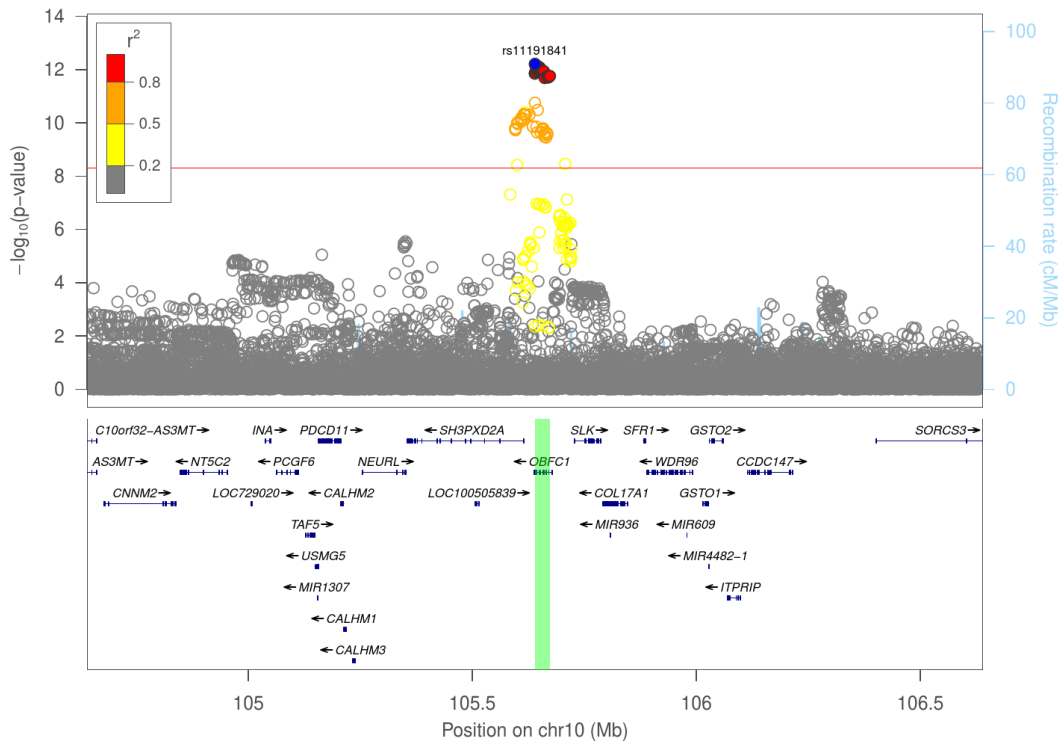

### SLC1A2, FEV<sub>1</sub>/FVC tier 2 rs10836366

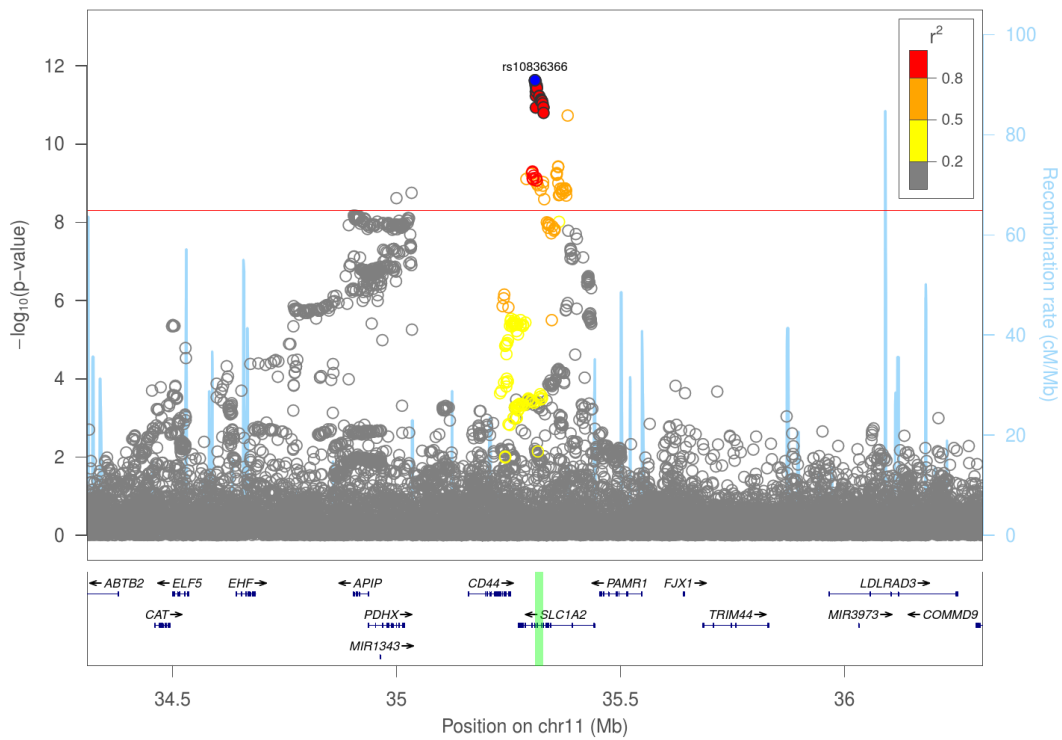

**FKBP4, FVC tier 1 rs56196860**

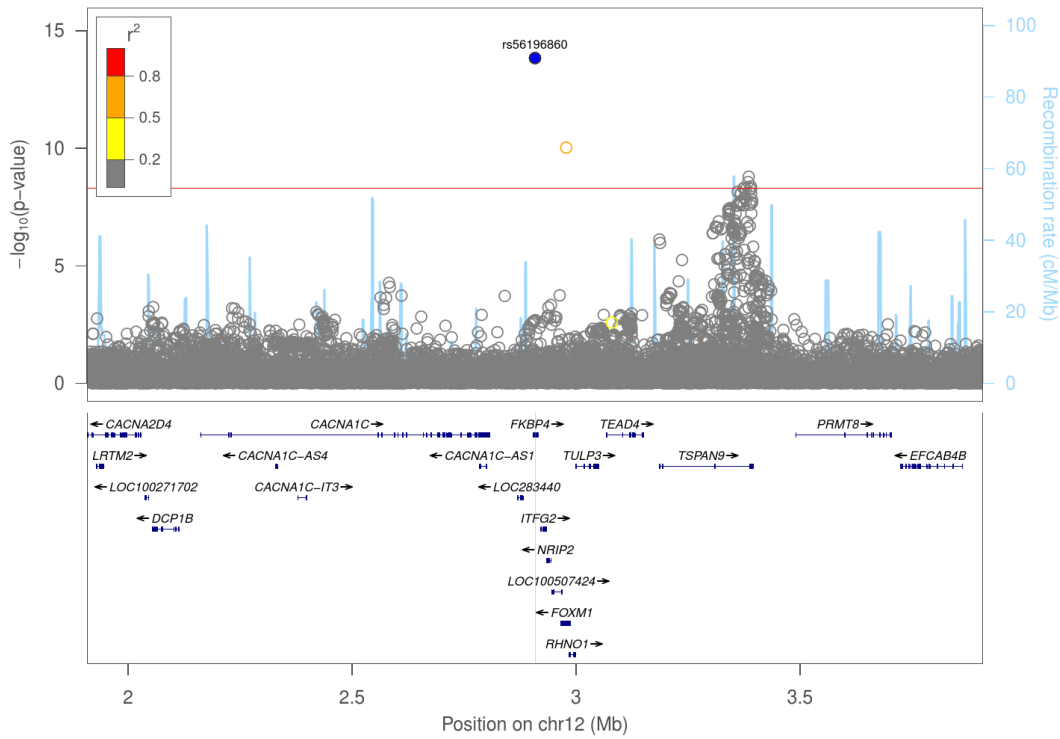

**CCND2-AS1, FEV<sub>1</sub> tier 2 rs12811814**

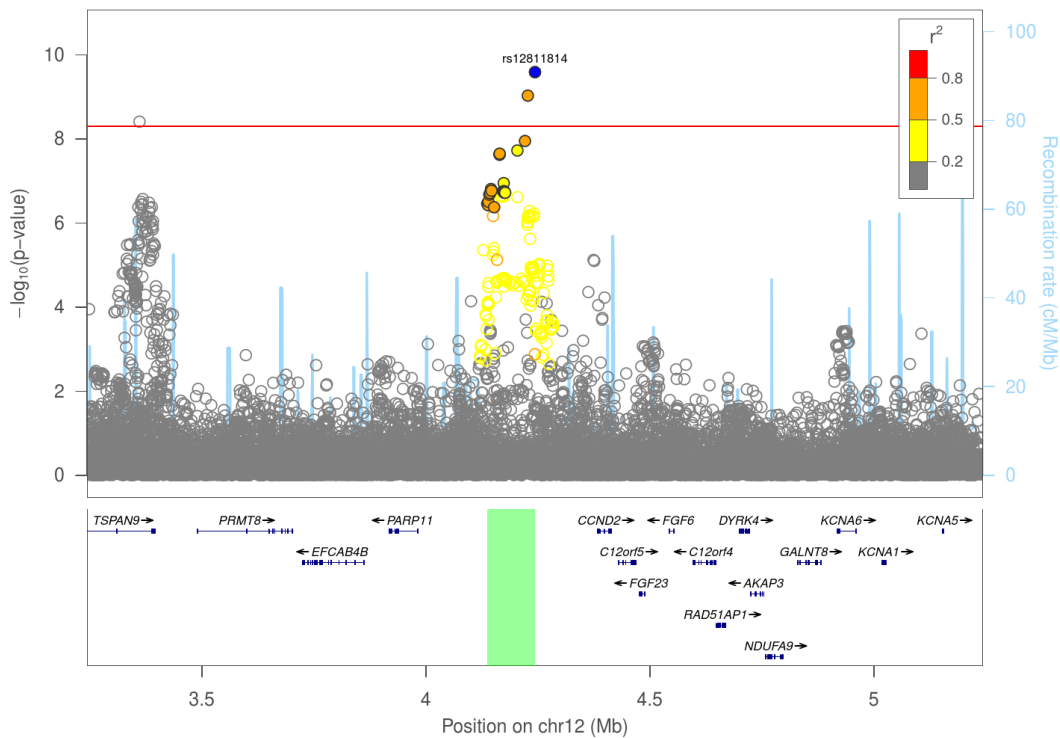



**AEBP2, FEV<sub>1</sub>/FVC tier 1 rs10841302**

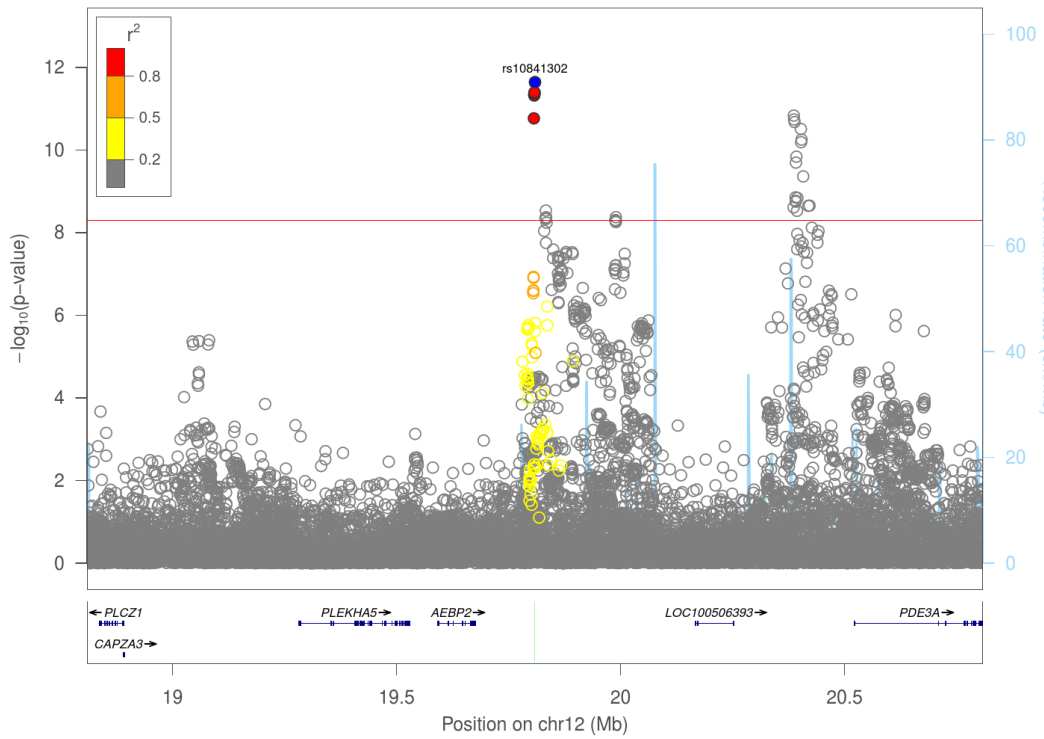

**RASSF3, FEV<sub>1</sub>/FVC tier 2 rs1244869**

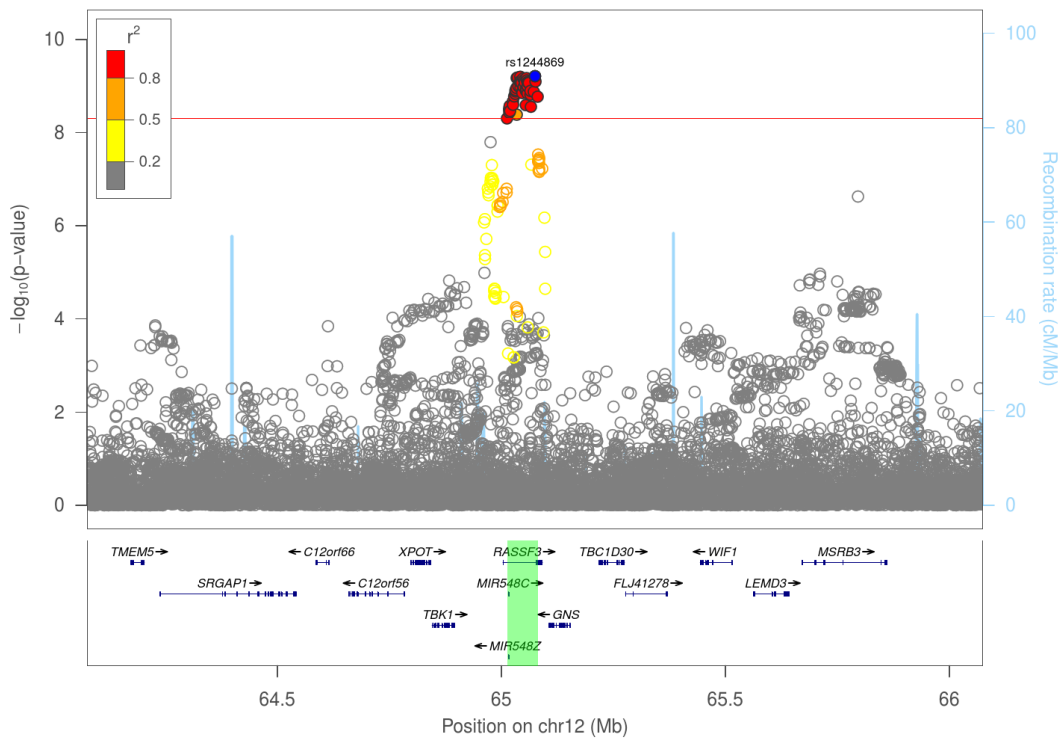

**MIR6074, FEV<sub>1</sub> tier 1 rs11176001**

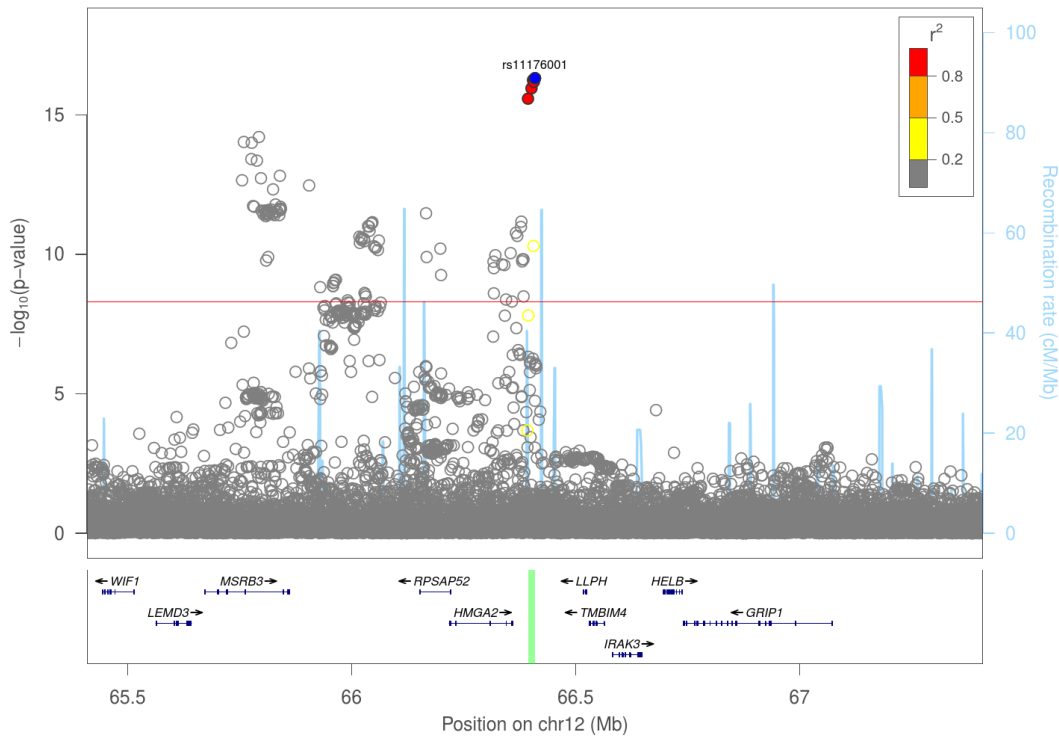

**IGF1, PEF tier 1 rs972936**

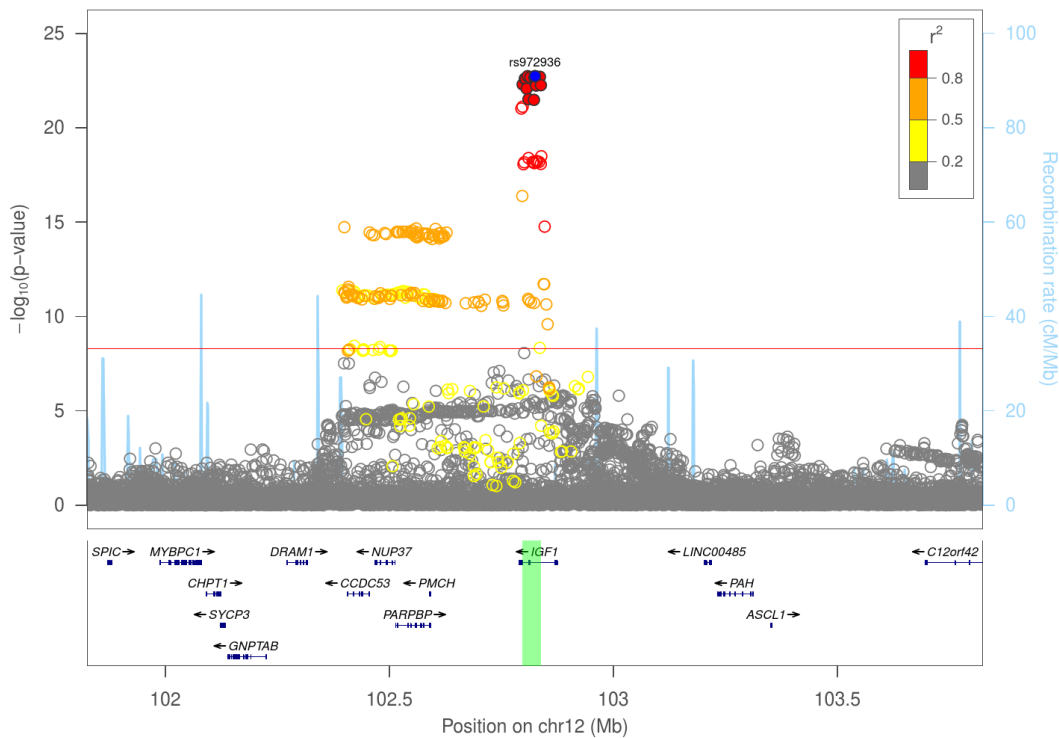

**TBX5, FEV<sub>1</sub> tier 1 rs2704110**

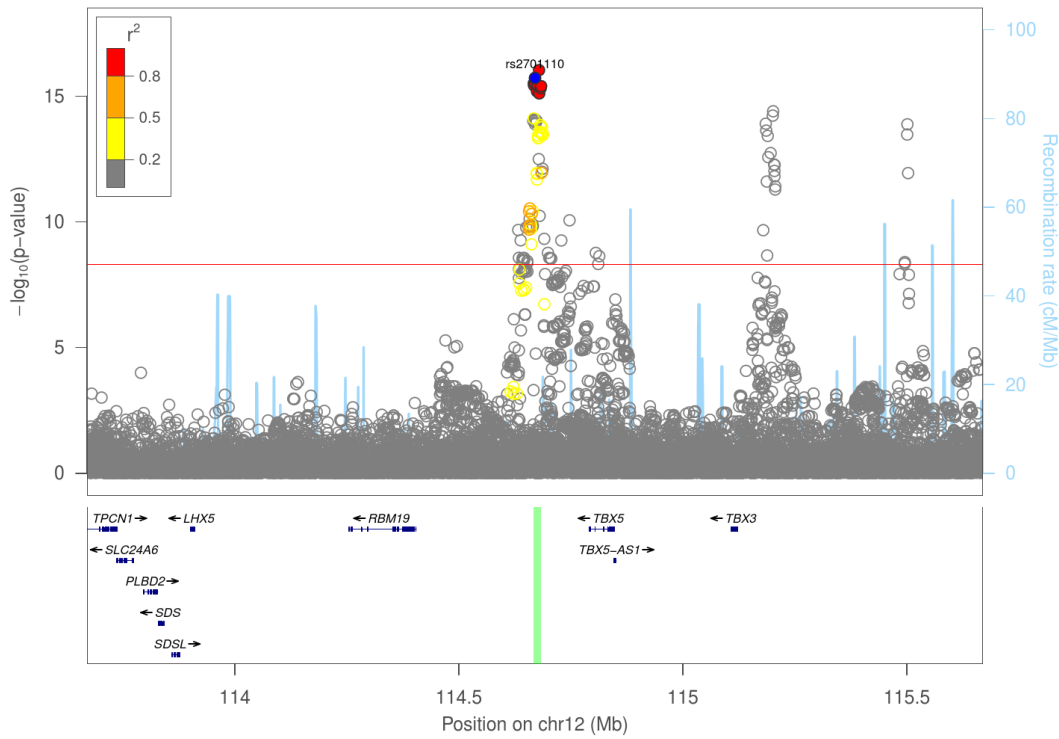

**MIR8079, FEV<sub>1</sub>/FVC tier 1 rs9533803**

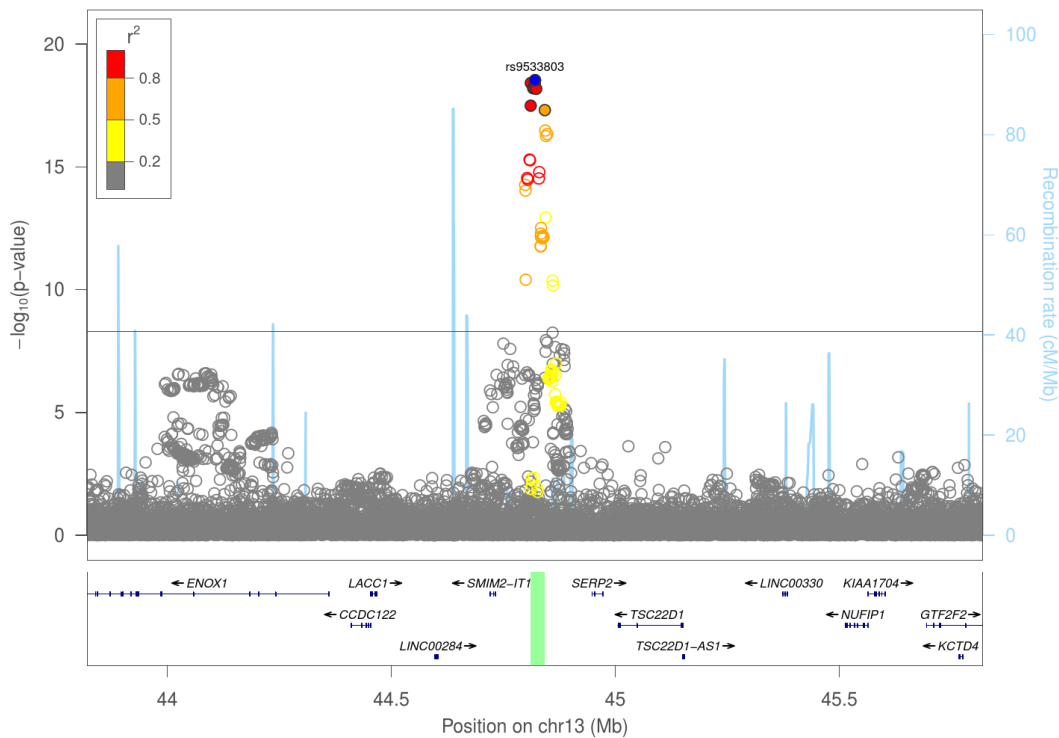

### DLEU1, FEV<sub>1</sub> tier 1 rs2812208

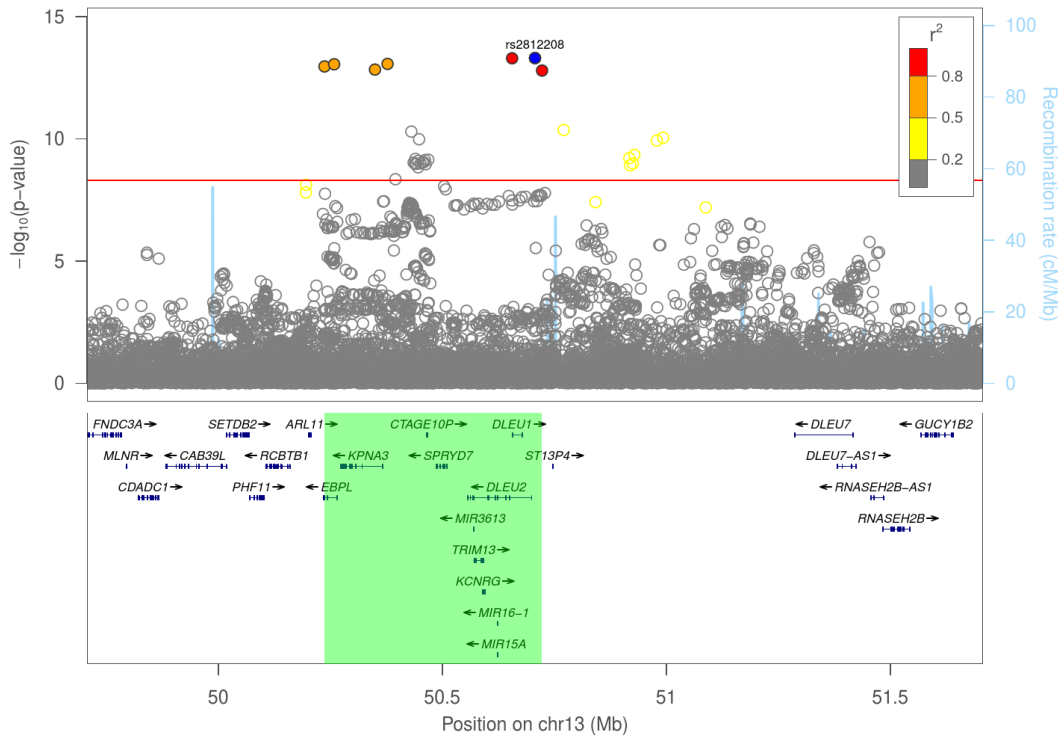

### LINC00348, FVC tier 1 rs803765

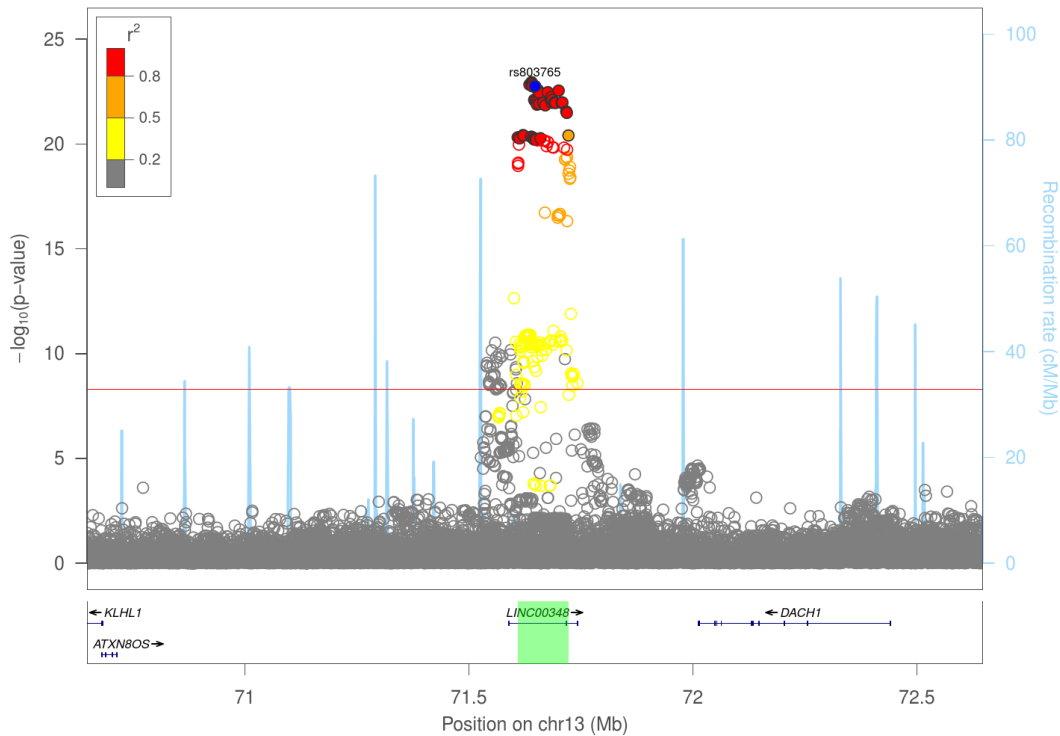

**LINC00382, FEV<sub>1</sub> tier 1 rs4885681**

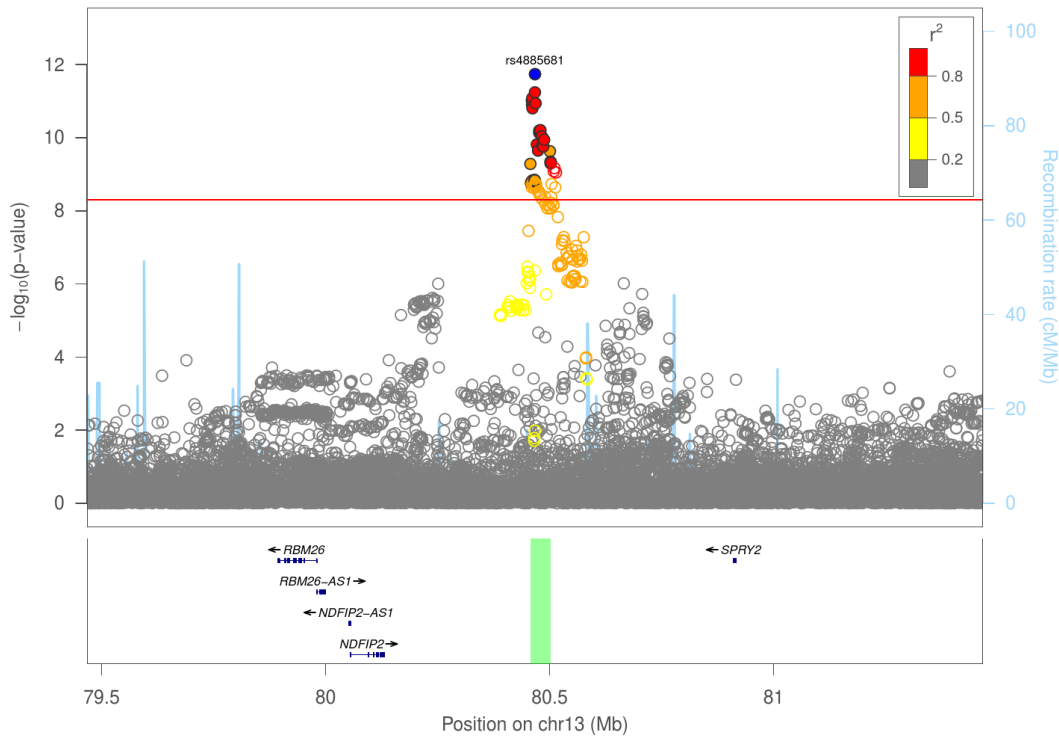

**DOCK9, FEV<sub>1</sub>/FVC tier 1 rs11620380**

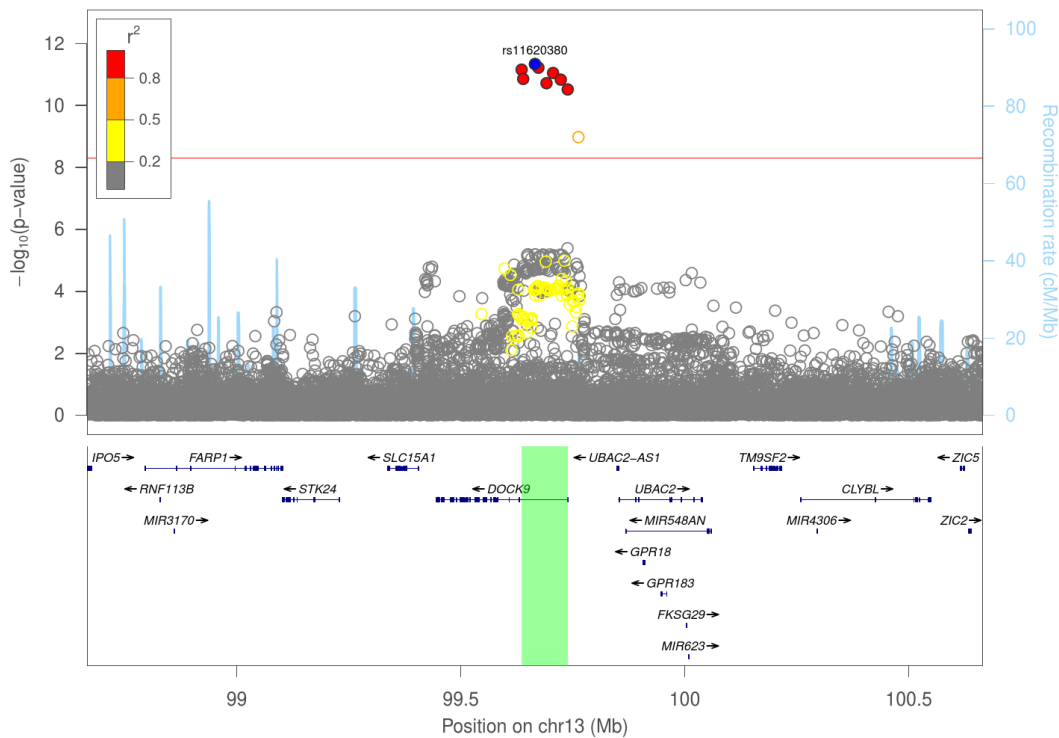

**MYO16, FEV<sub>1</sub>/FVC tier 1 rs9634470**

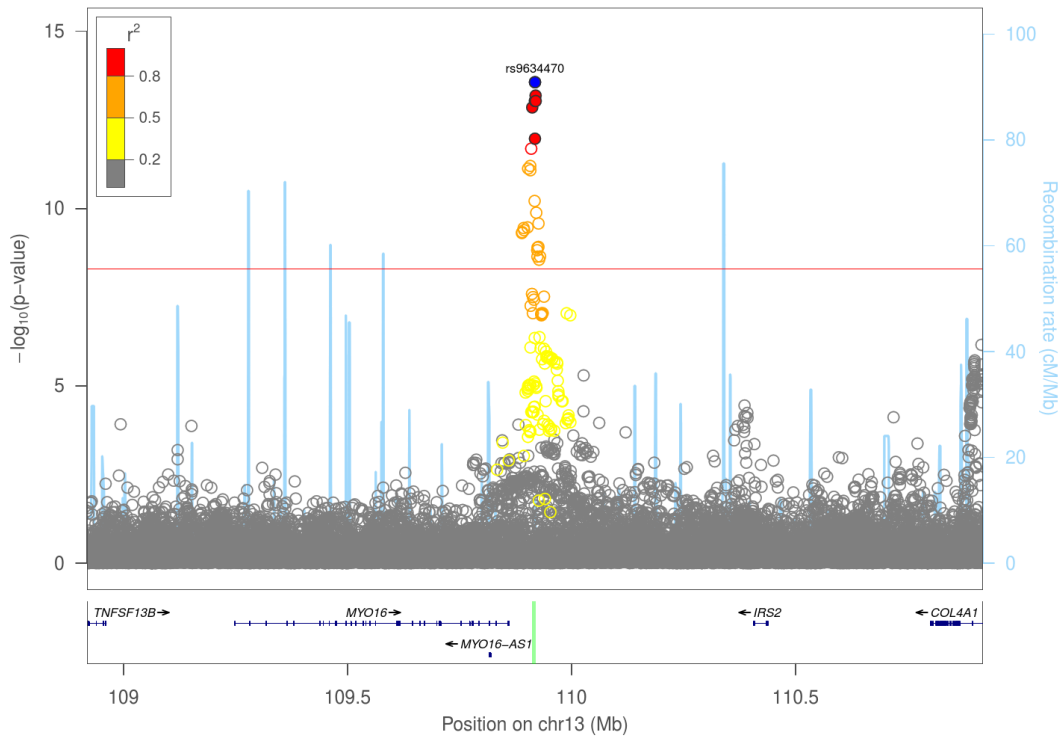

**HAUS4, FEV<sub>1</sub>/FVC tier 1 rs1951121**

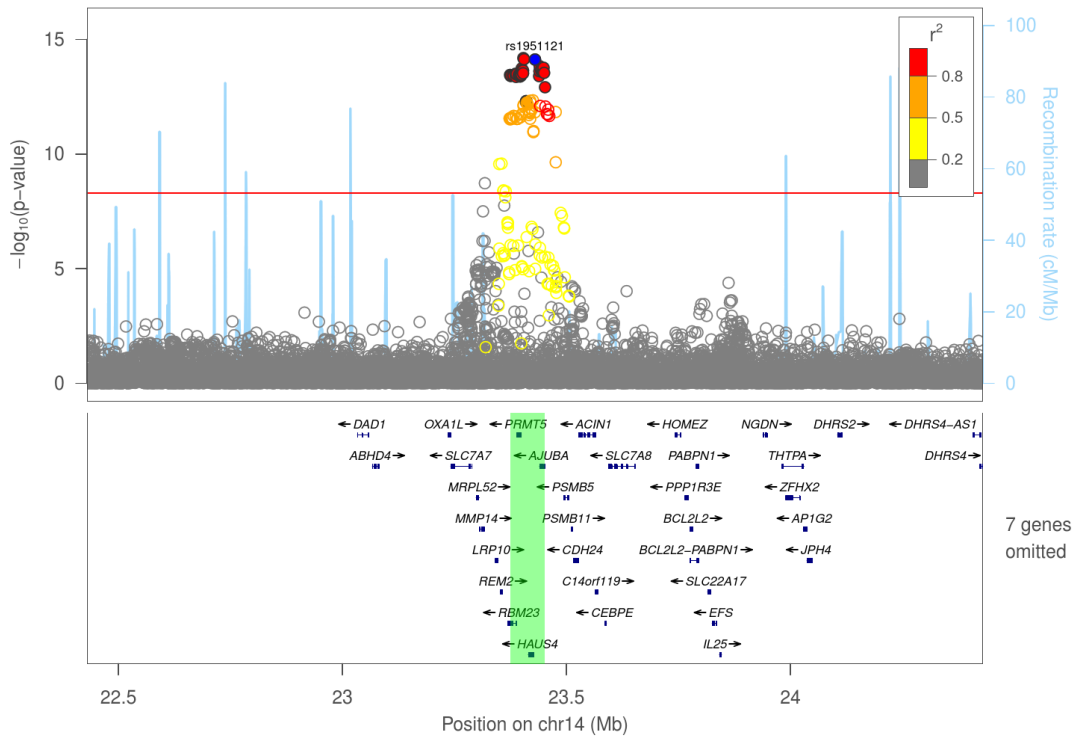

**MIR5580, FEV<sub>1</sub>/FVC tier 1 rs74053129**

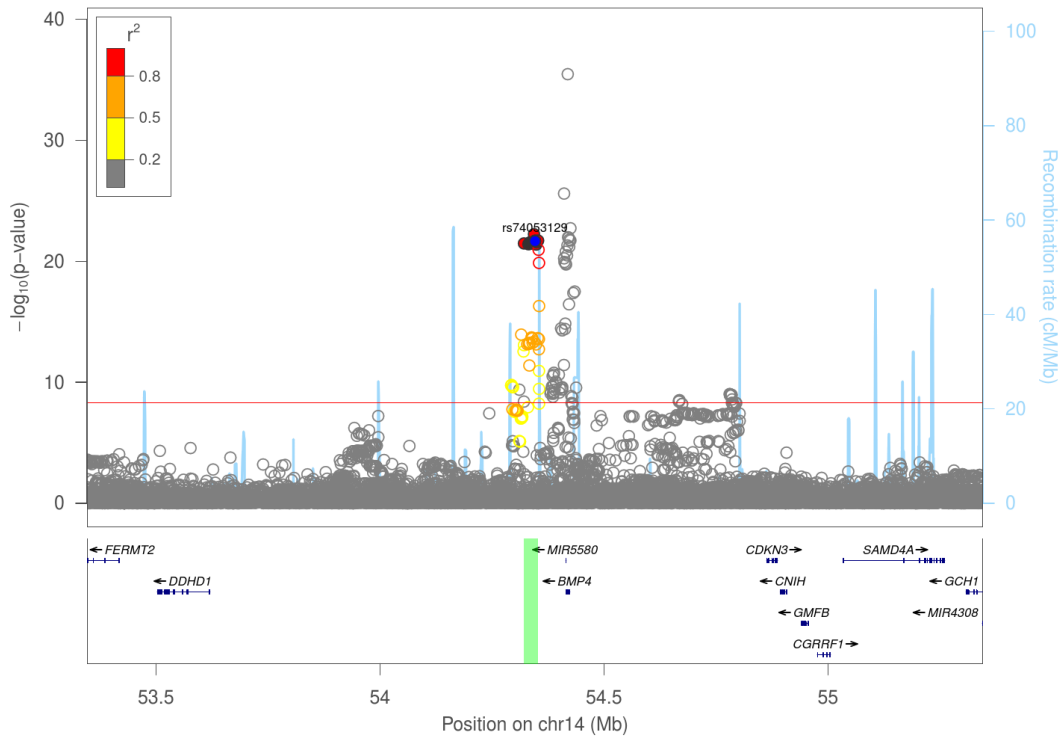

**VRTN, FVC tier 1 rs10141786**

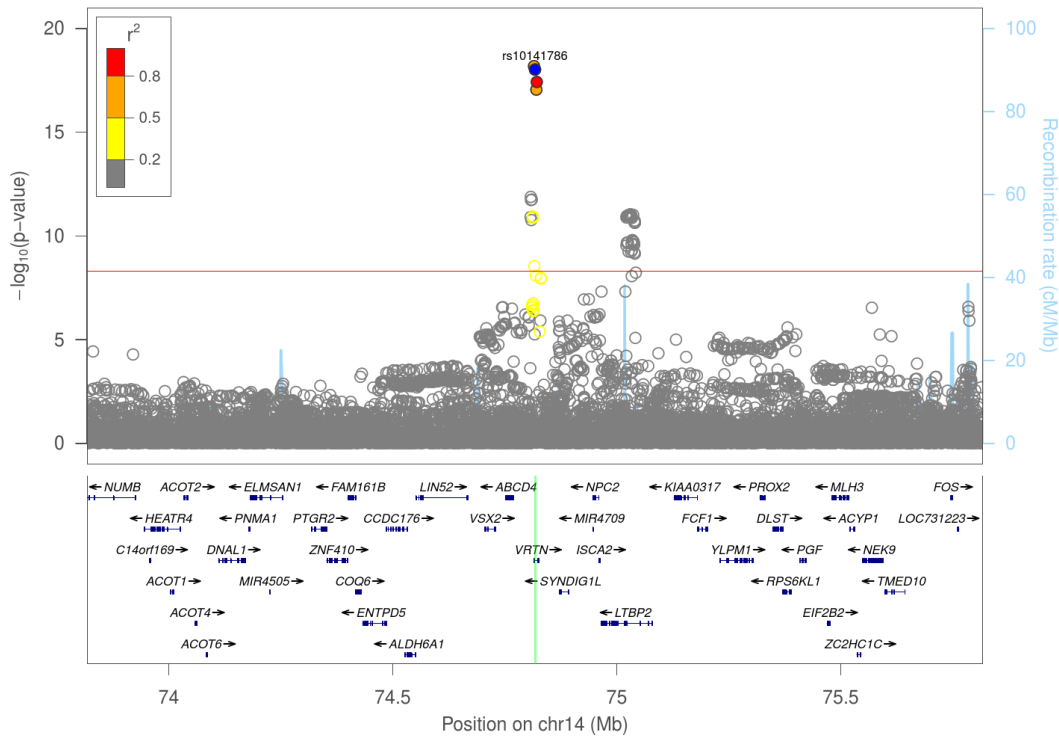

**BMF, FVC tier 1 rs34245505**

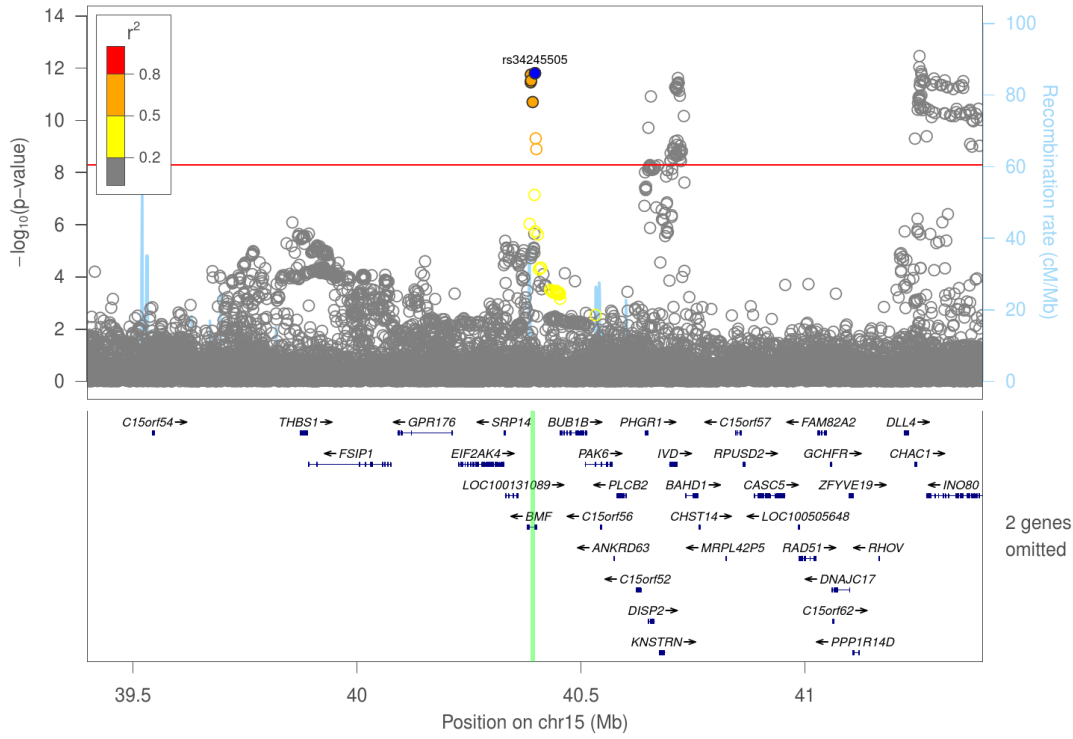

**IVD, FEV<sub>1</sub> tier 2 rs2304645**

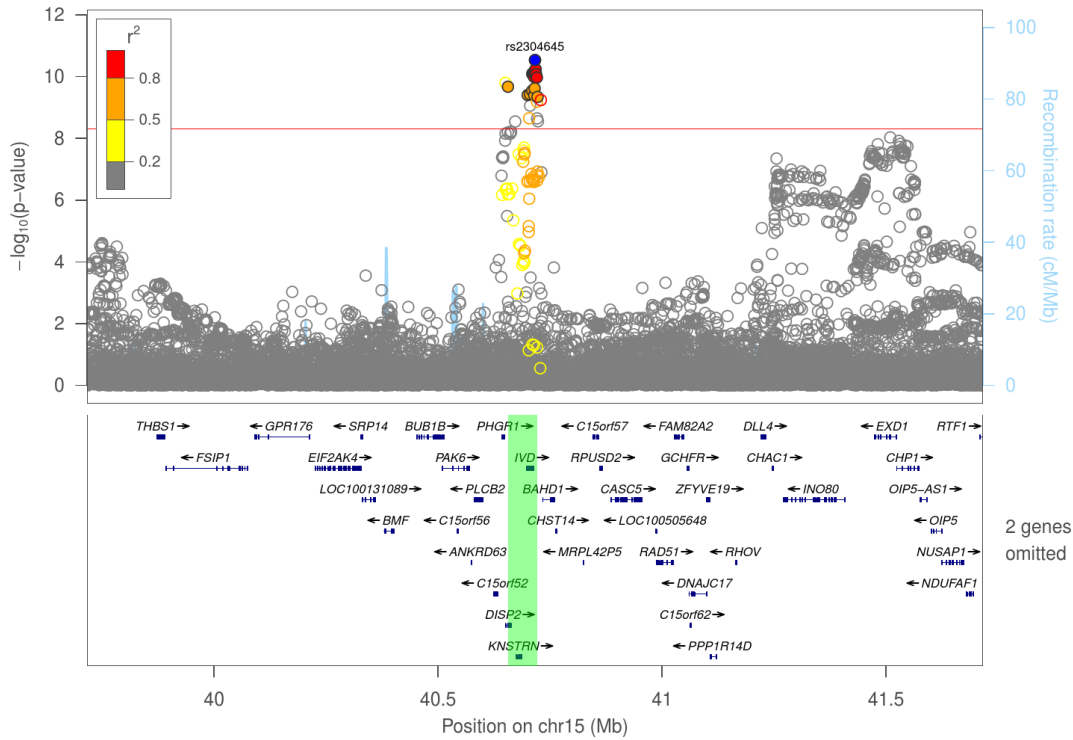



**CHAC1, FVC tier 1 rs4924525**

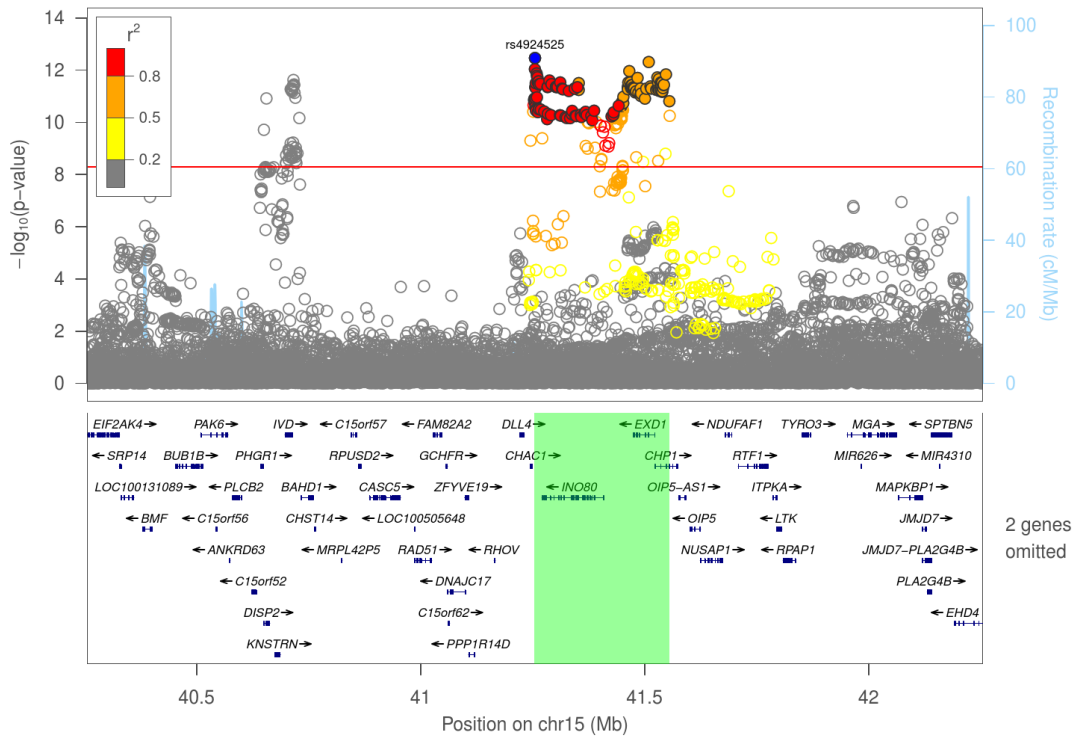

**COPS2, FEV<sub>1</sub>/FVC tier 1 rs79234094**

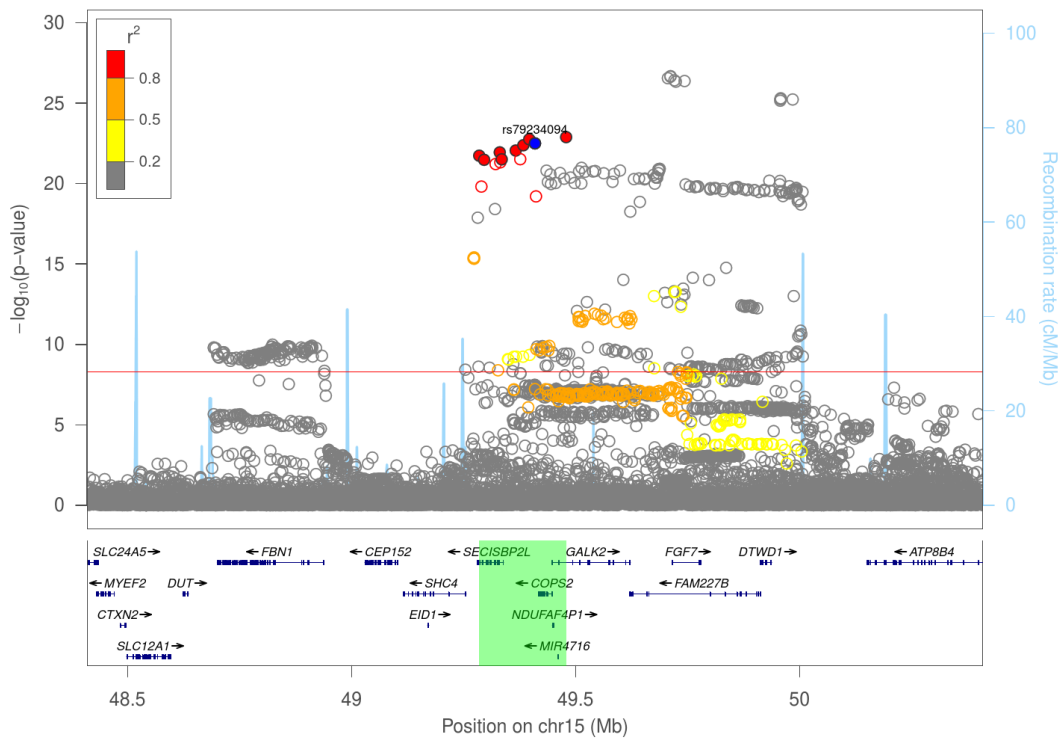

**FAM227B, FEV<sub>1</sub>/FVC tier 1 rs35251997**

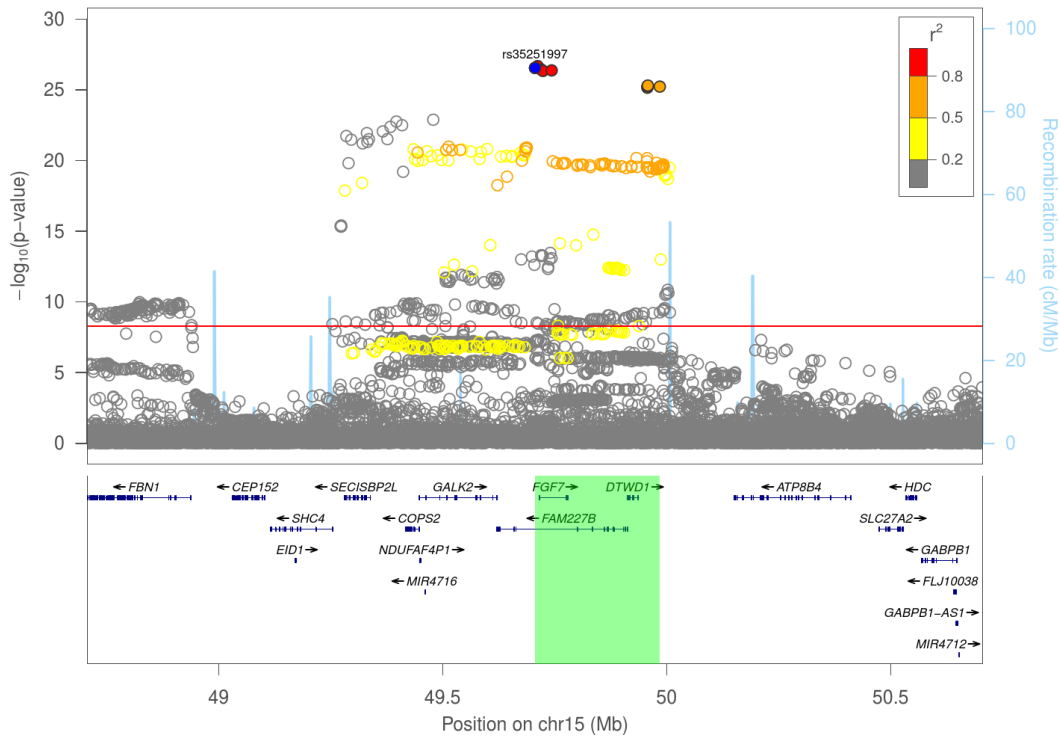

**USP3, FEV<sub>1</sub>/FVC tier 1 rs62012772**

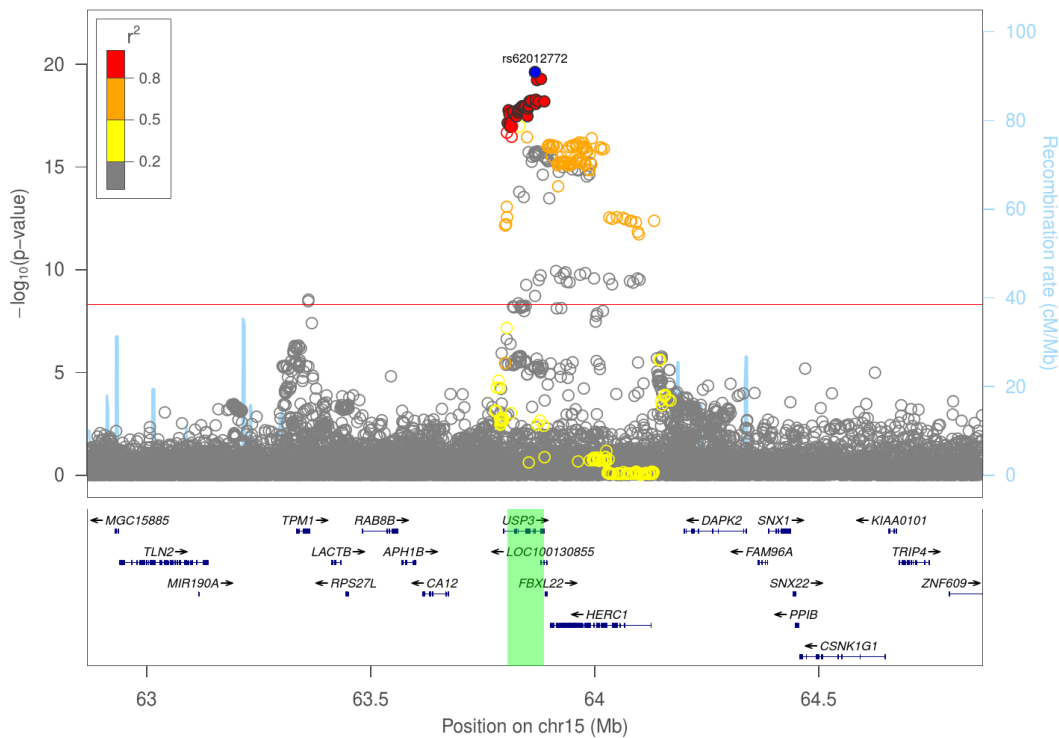

**REC114, FEV<sub>1</sub>/FVC tier 2 rs7176074**

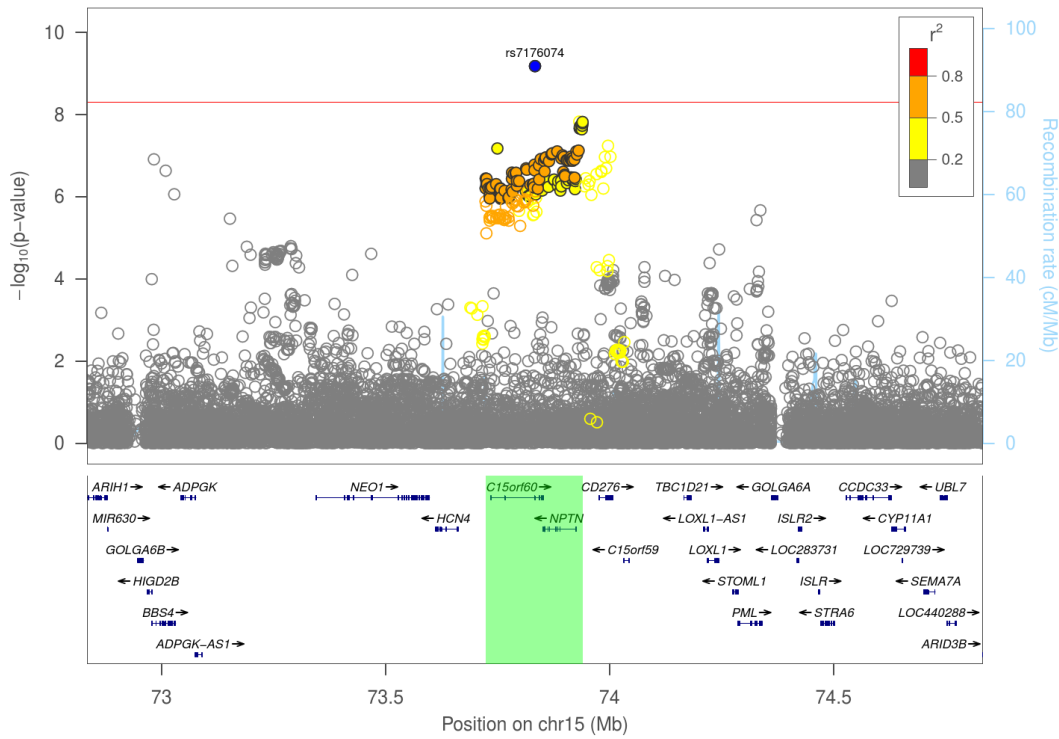

**CLUAP1, FVC tier 1 rs3751837**

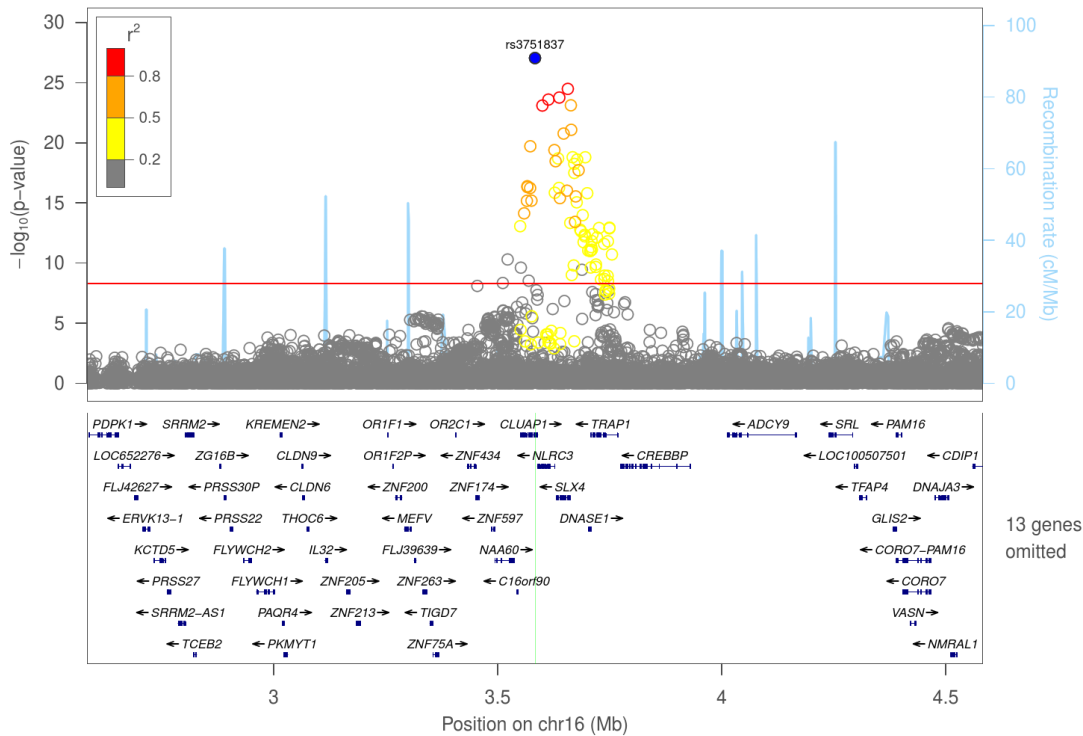

**GLIS2-AS1, FEV<sub>1</sub>/FVC tier 1 rs56104880**

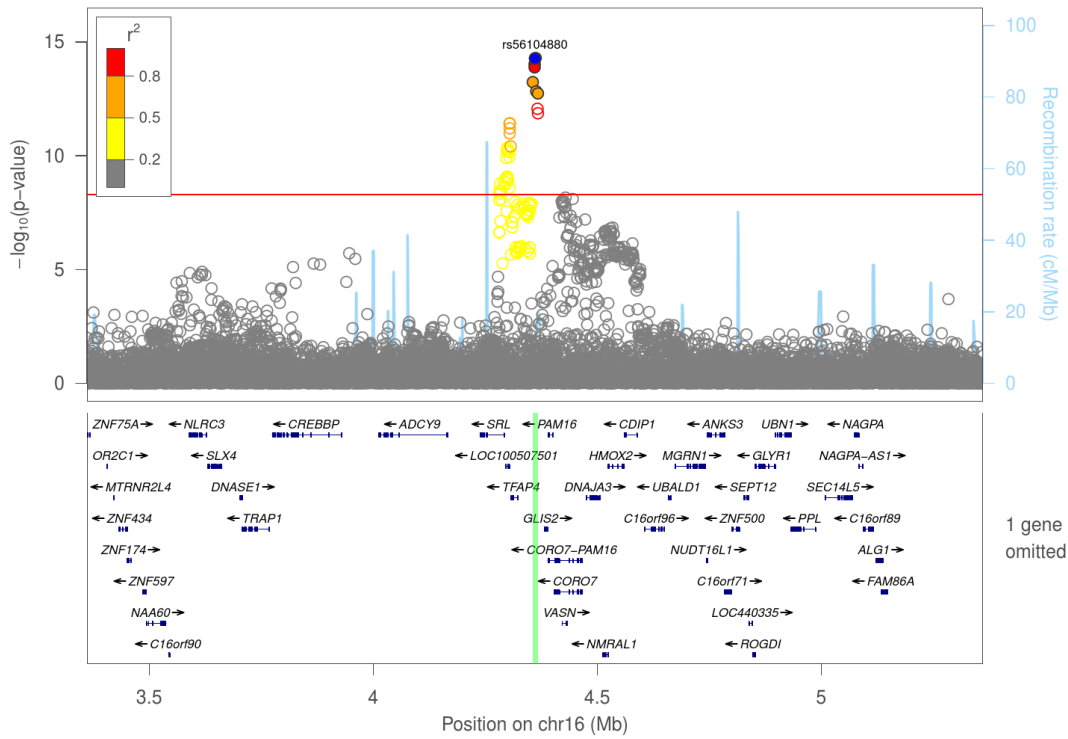

**GRIN2A, FVC tier 2 rs11074547**

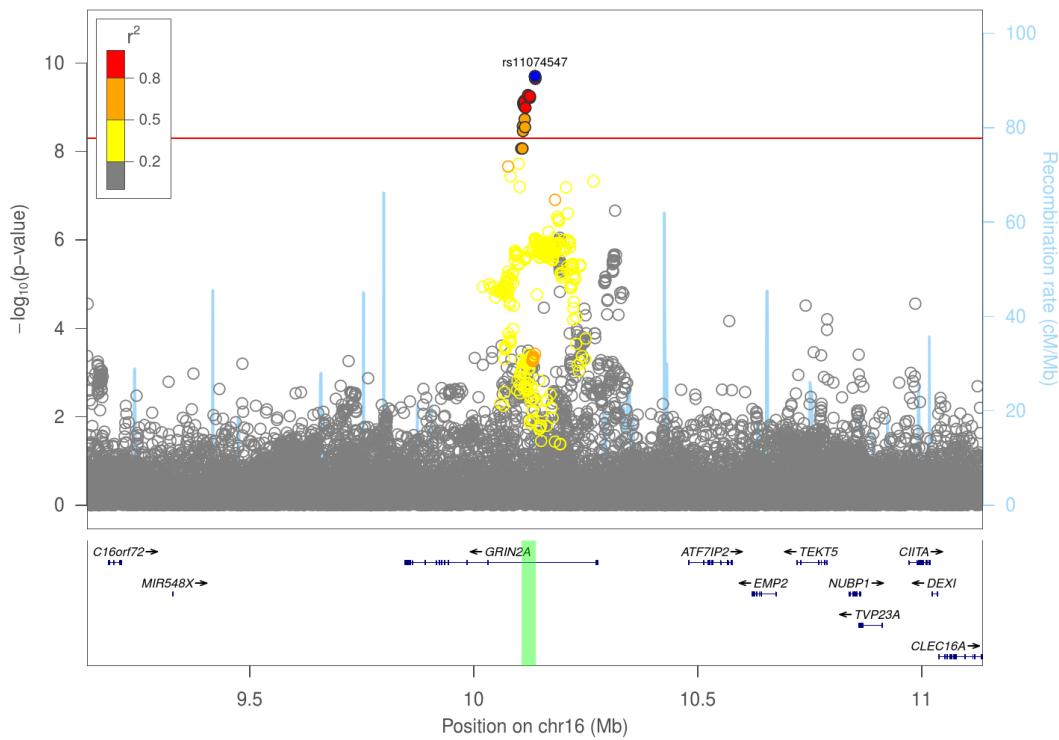

**PAPD5, FVC tier 1 rs76219171**

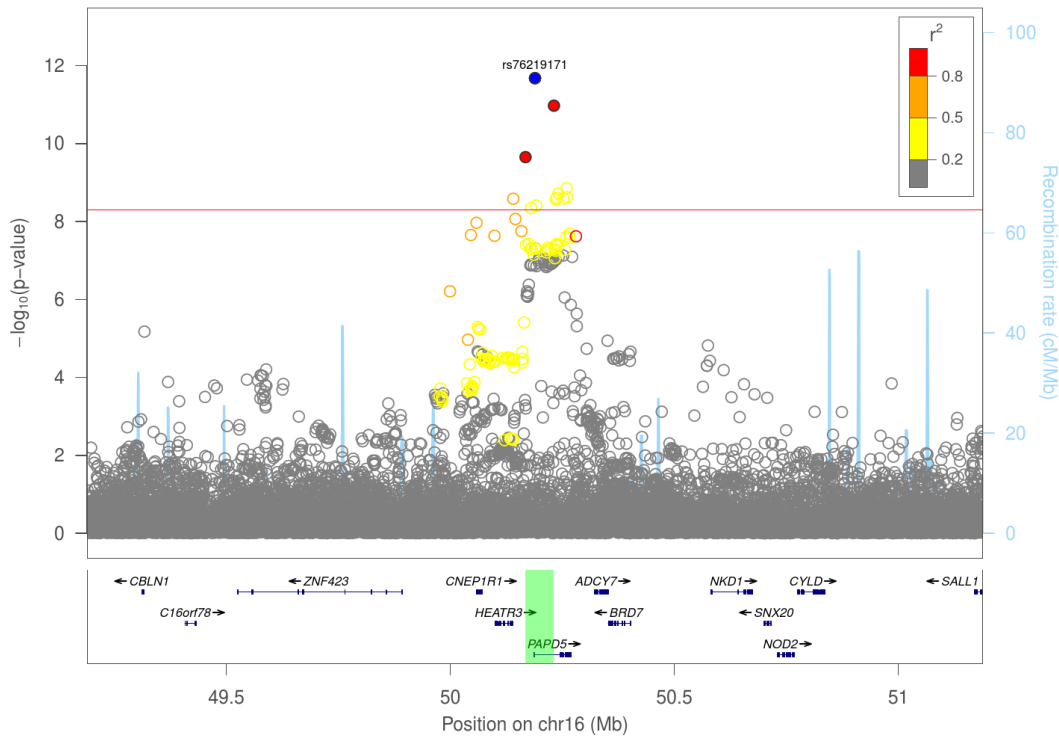

**FTO, FEV<sub>1</sub>/FVC tier 1 rs35420030**

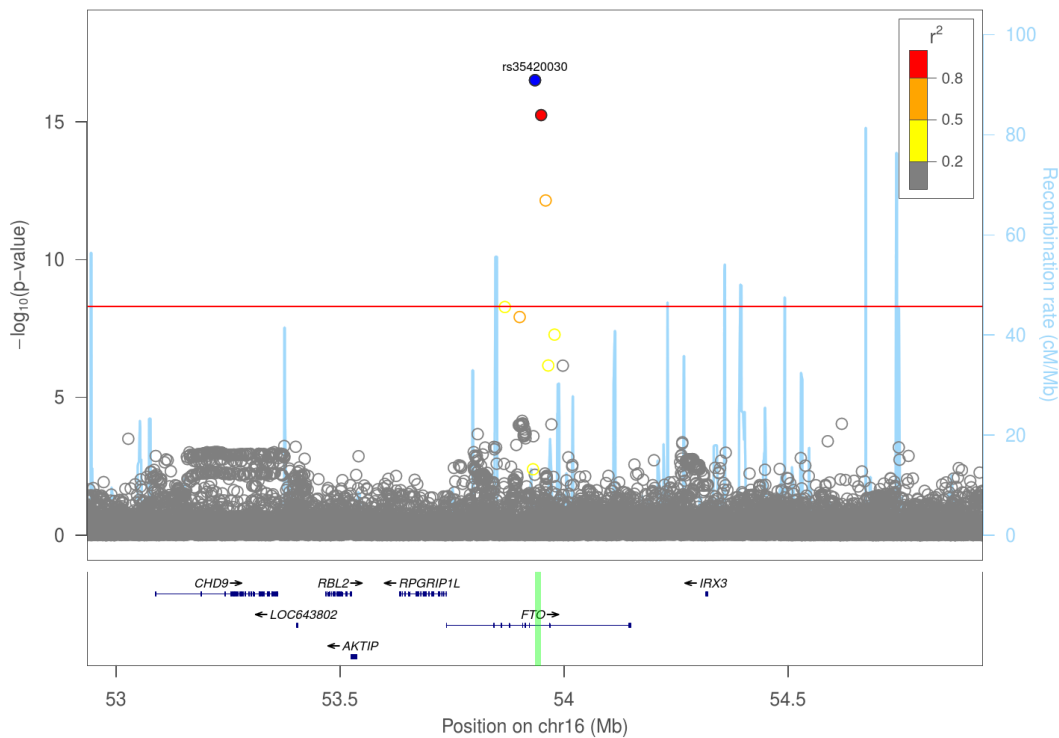

### LINC00917, FEV<sub>1</sub>/FVC tier 1 rs12918140

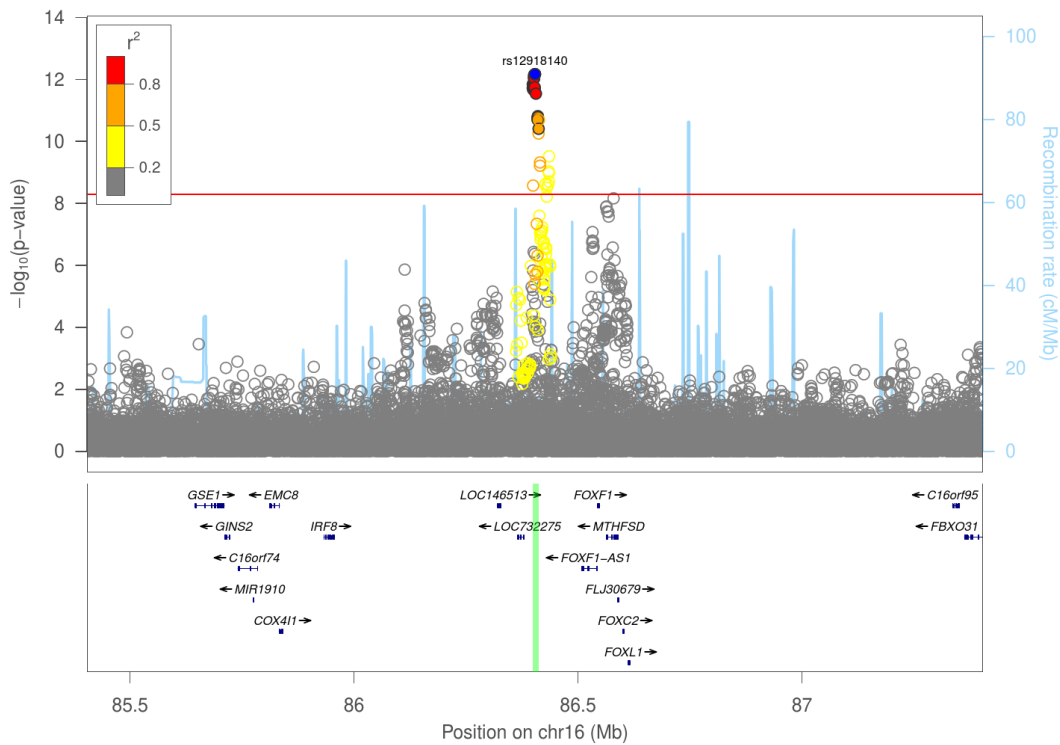

### MTHFSD, FEV<sub>1</sub> tier 2 rs6539952

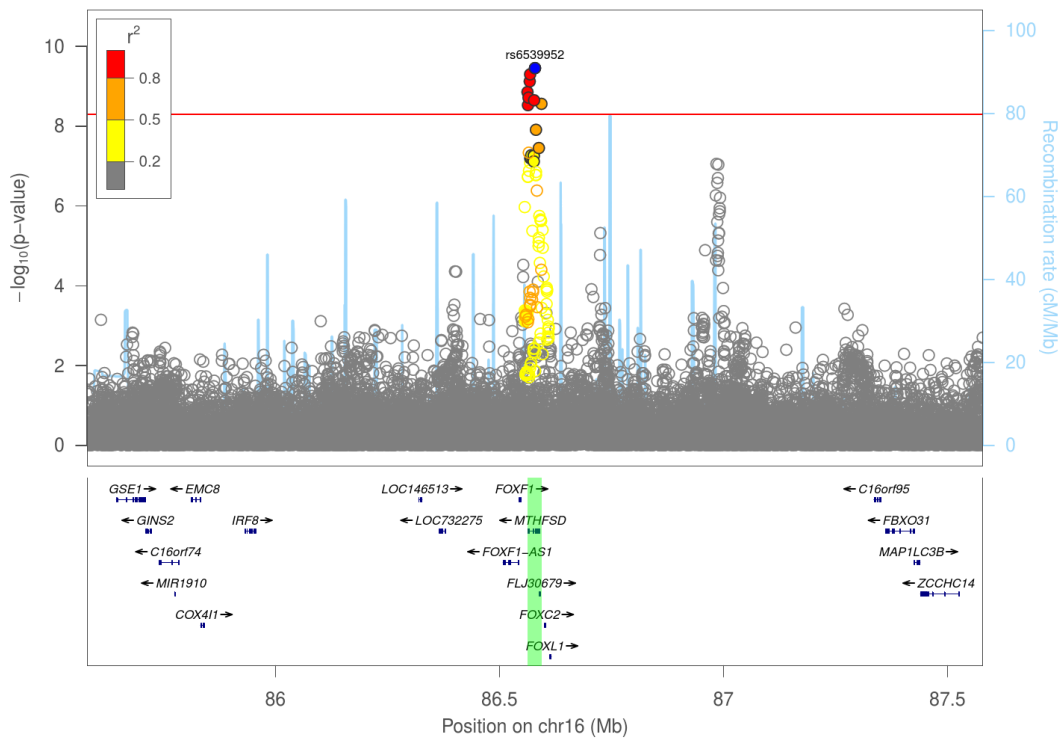

**ATP2A3, FEV<sub>1</sub>/FVC tier 1 rs8082036**

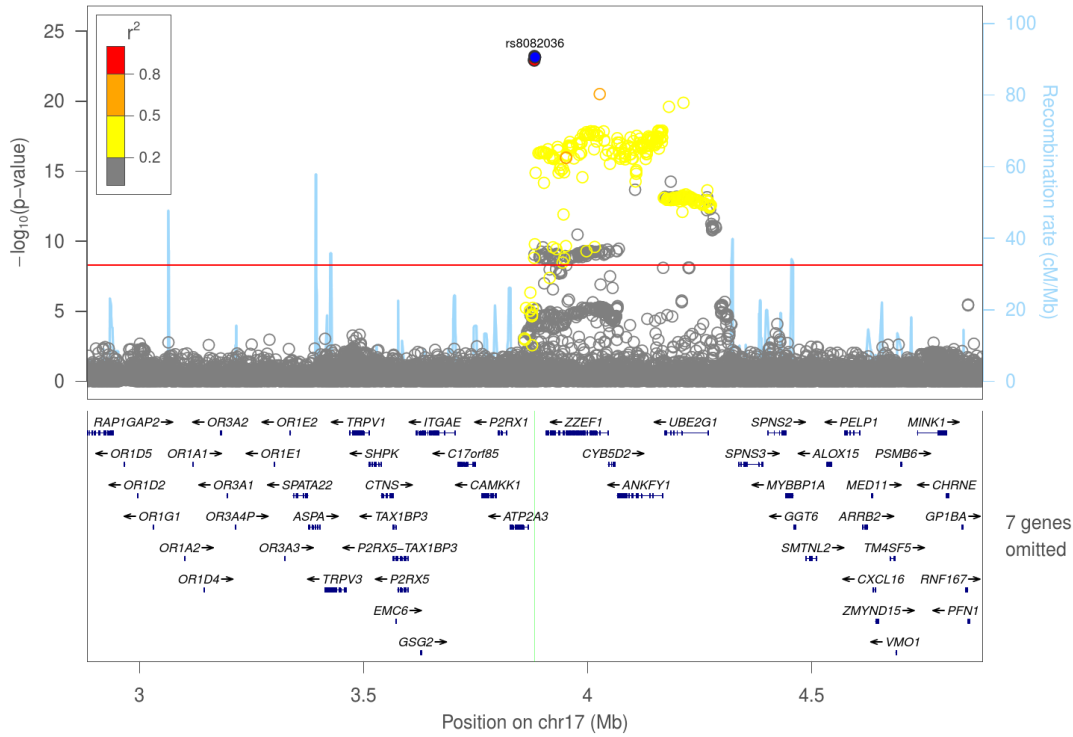

**PITPNM3, FEV<sub>1</sub> tier 2 rs4796334**

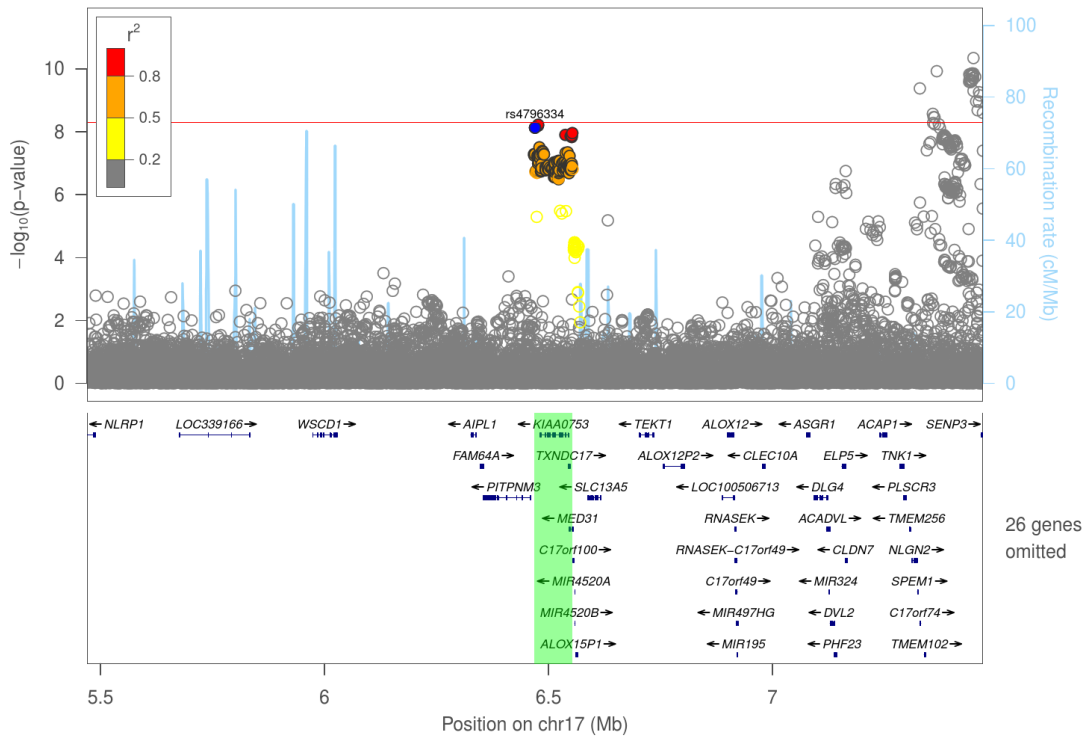

**CLDN7, FVC tier 2 rs1215**

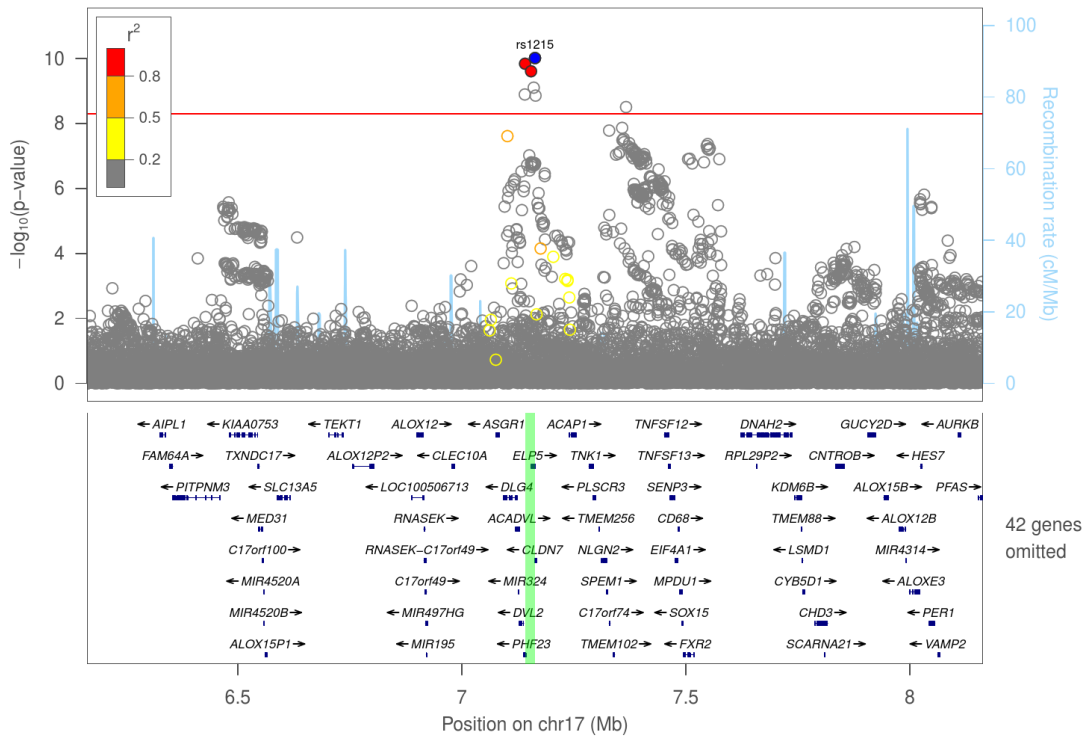

**TNFSF12-TNFSF13, FEV<sub>1</sub> tier 2 rs4968200**

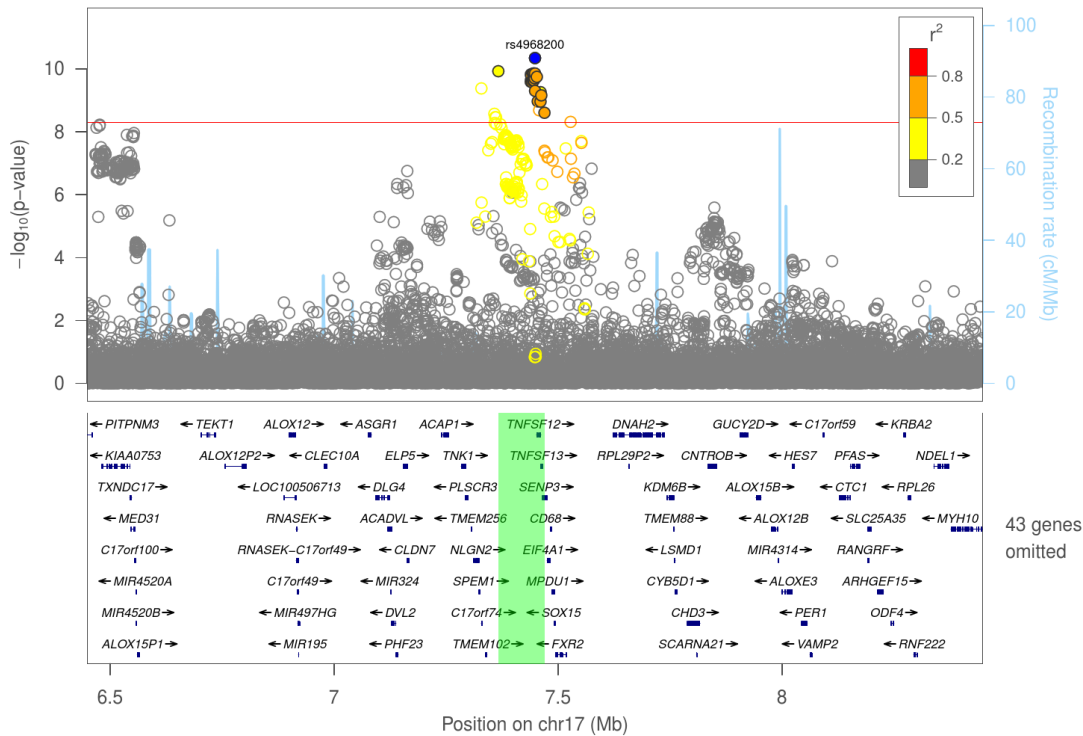



**NCOR1, FVC tier 2 rs34351630**

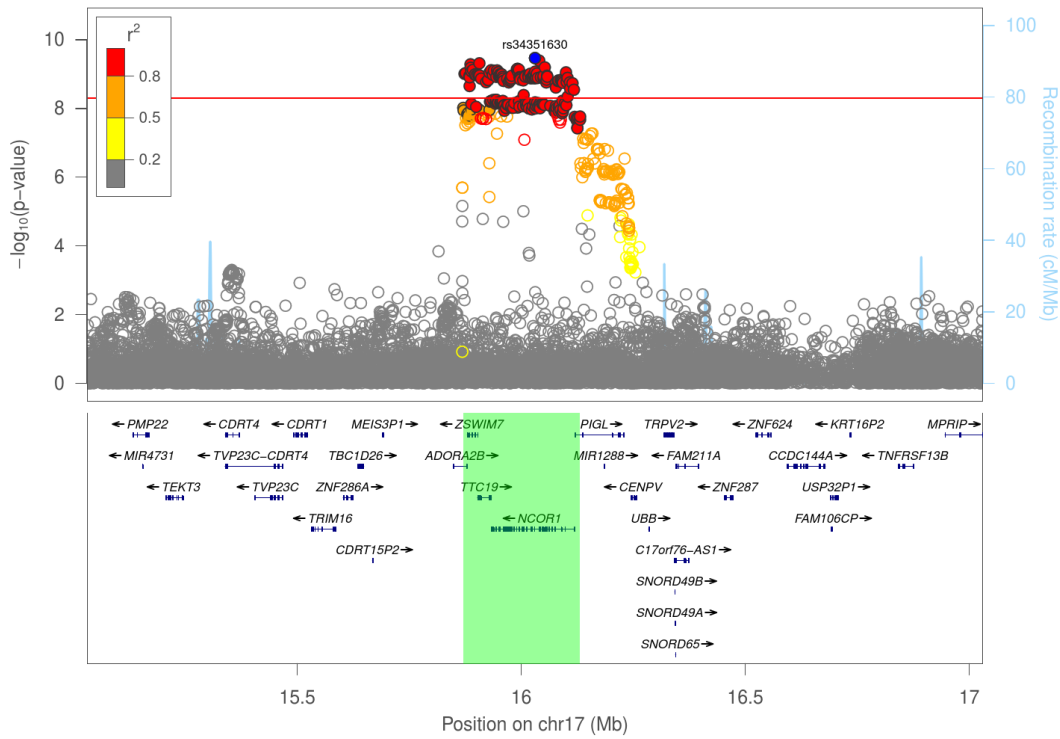

**LOC101927166, FVC tier 2 rs12945803**

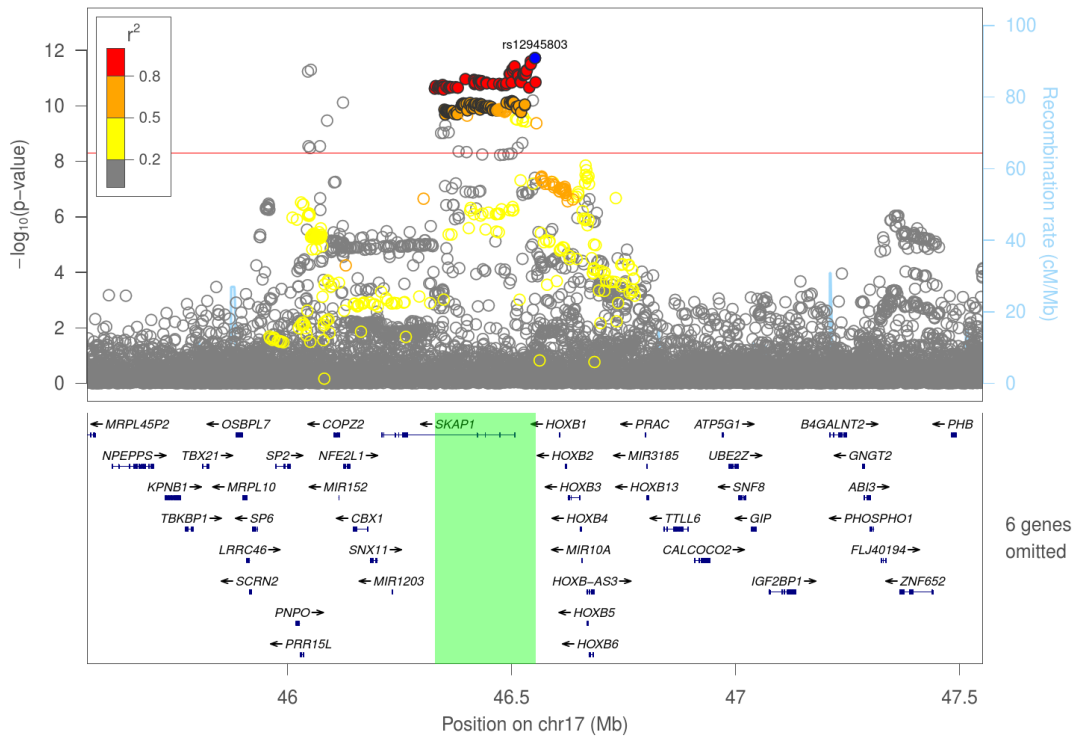

**ANKFN1, FVC tier 1 rs28519449**

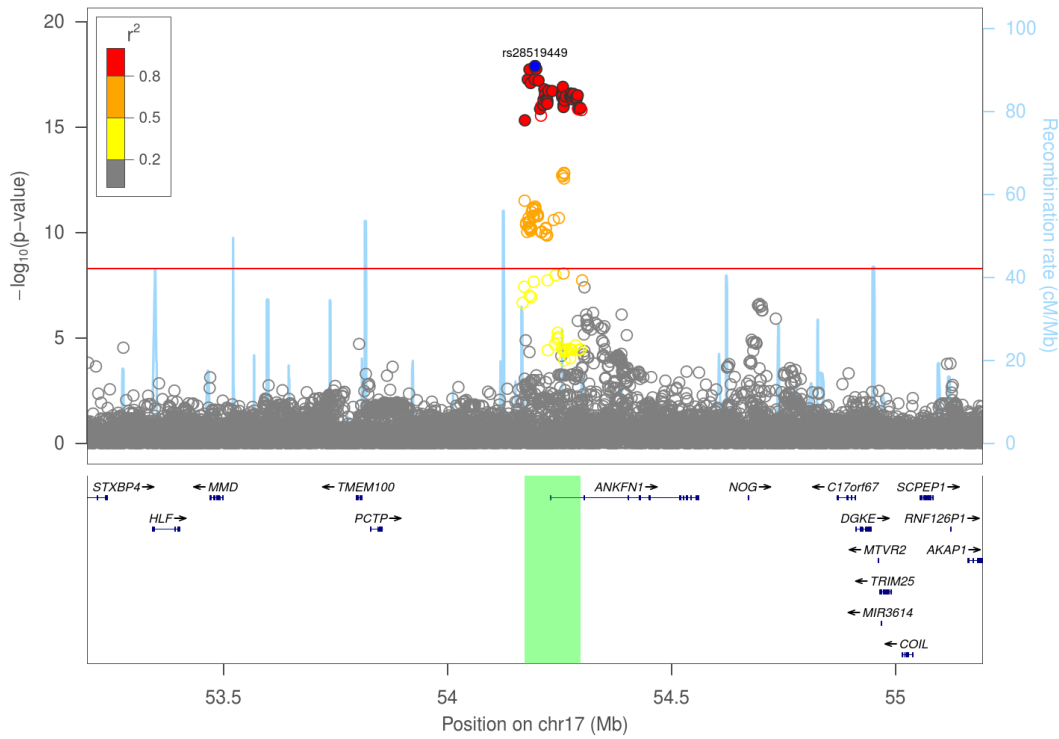

**BCAS3, FEV<sub>1</sub>/FVC tier 1 rs8068952**

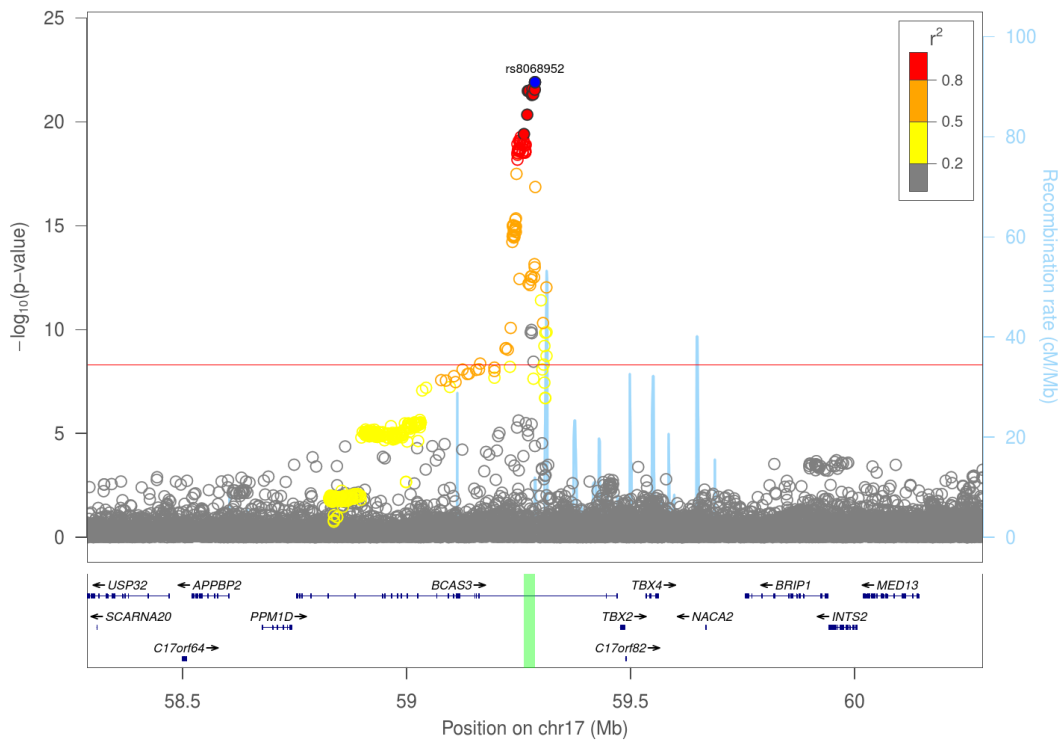

**DDX5, FVC tier 2 rs77672322**

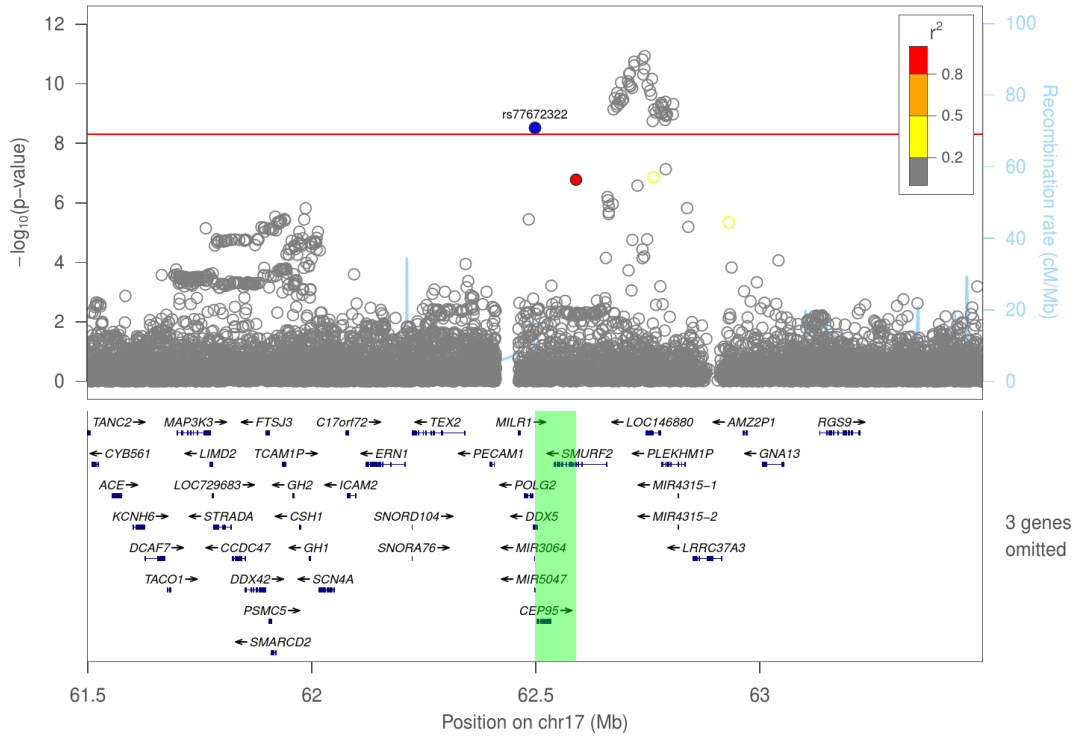

**SMURF2, FEV<sub>1</sub>/FVC tier 1 rs11653958**

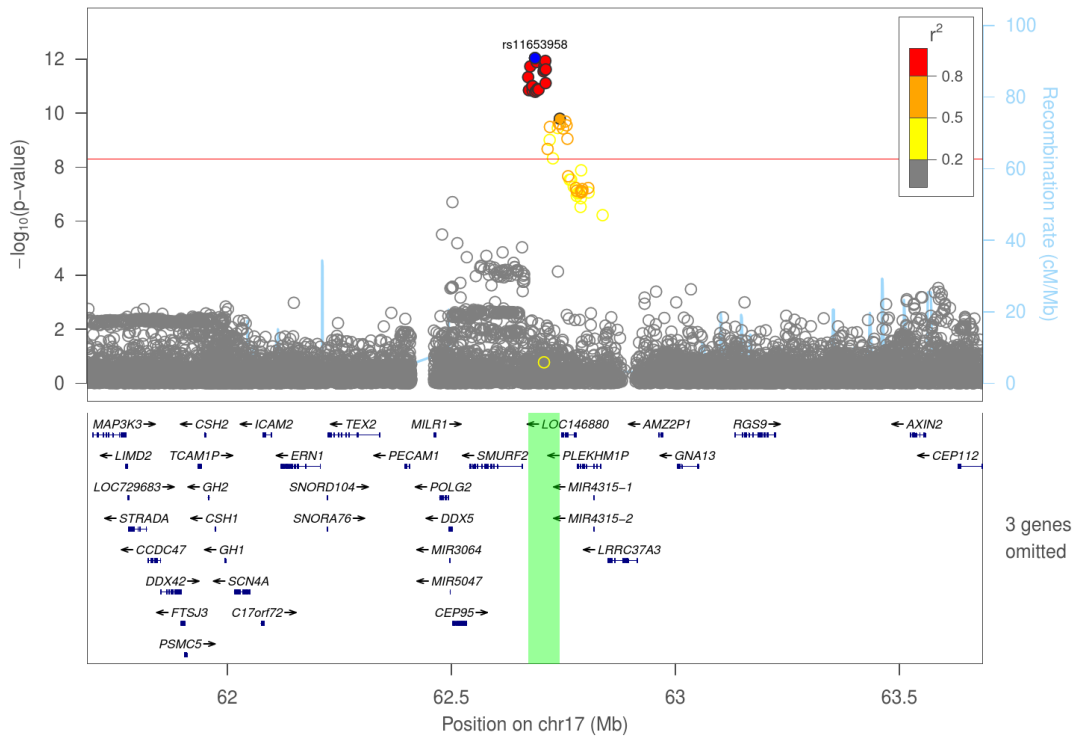

**CASC17, FEV<sub>1</sub>/FVC tier 1 rs996865**

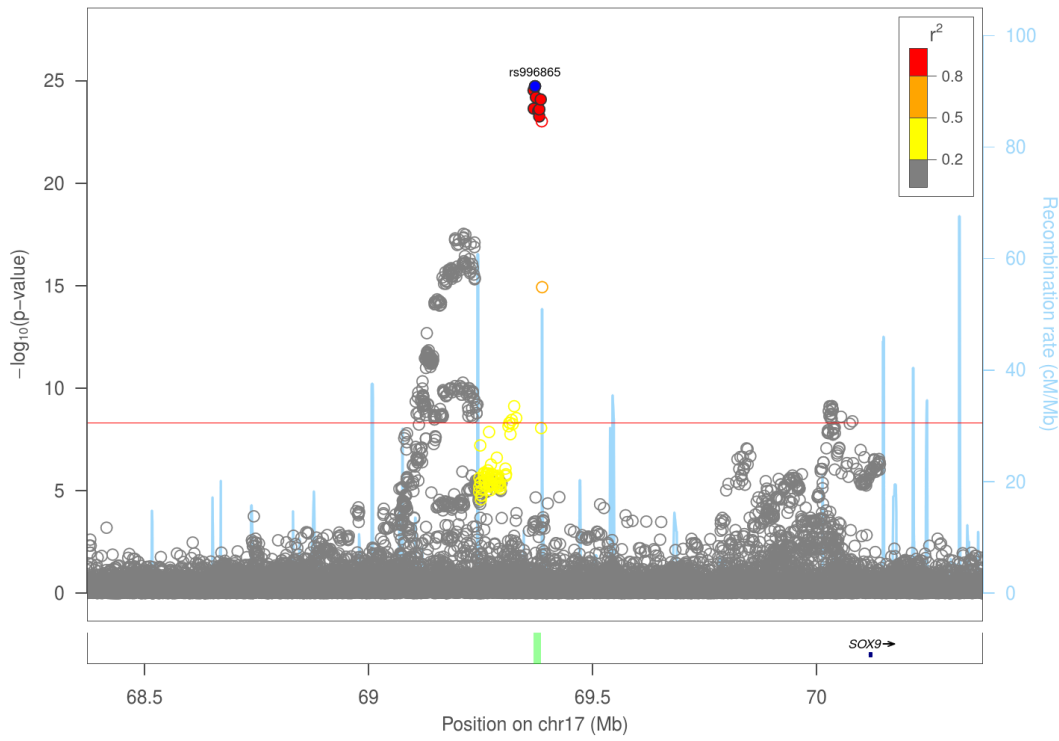

**ASPCR1, FVC tier 1 rs59606152**

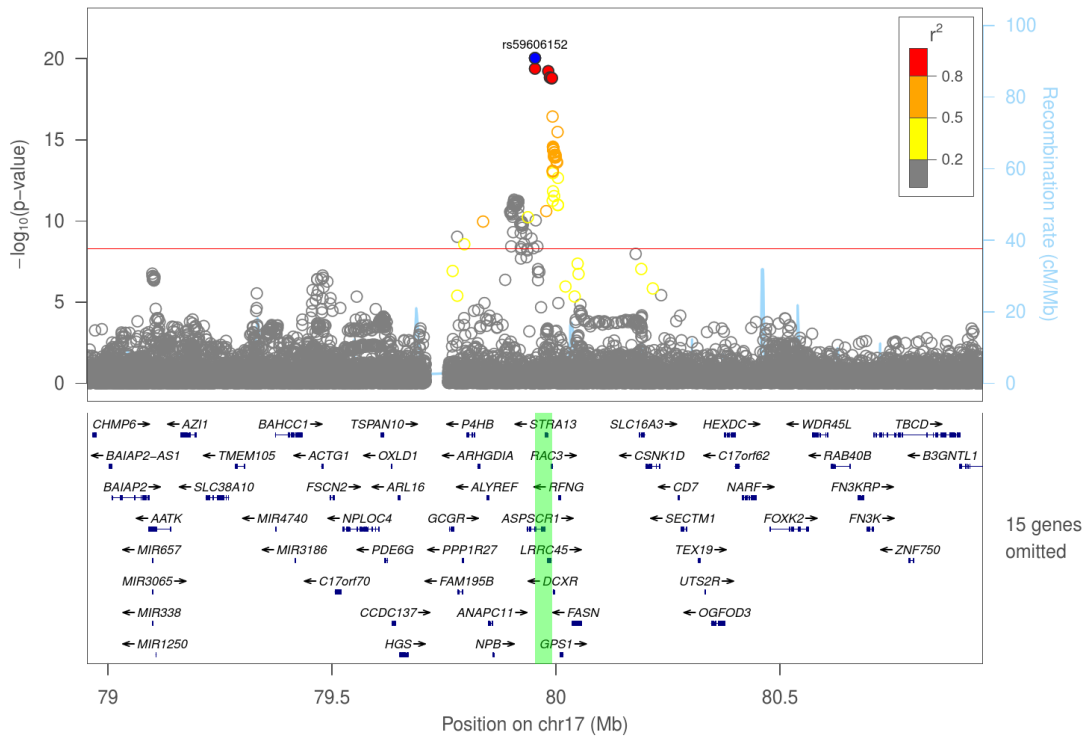

### VAPA, FEV<sub>1</sub>/FVC tier 1 rs8089099

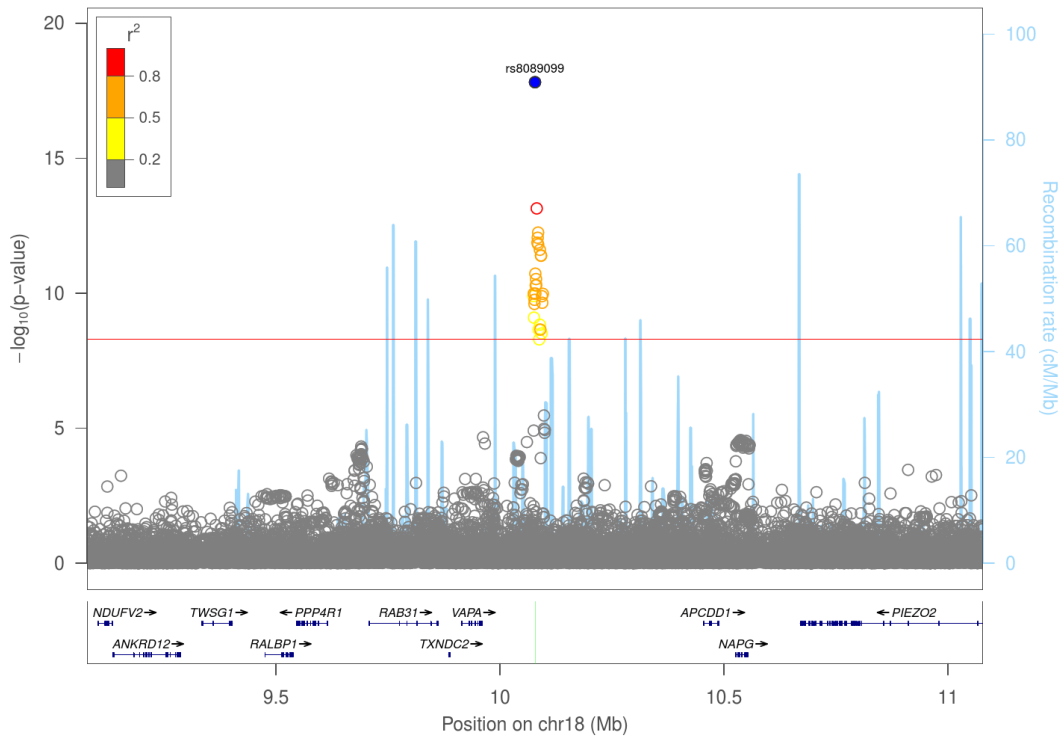

### GATA6, FEV<sub>1</sub>/FVC tier 2 rs1985511

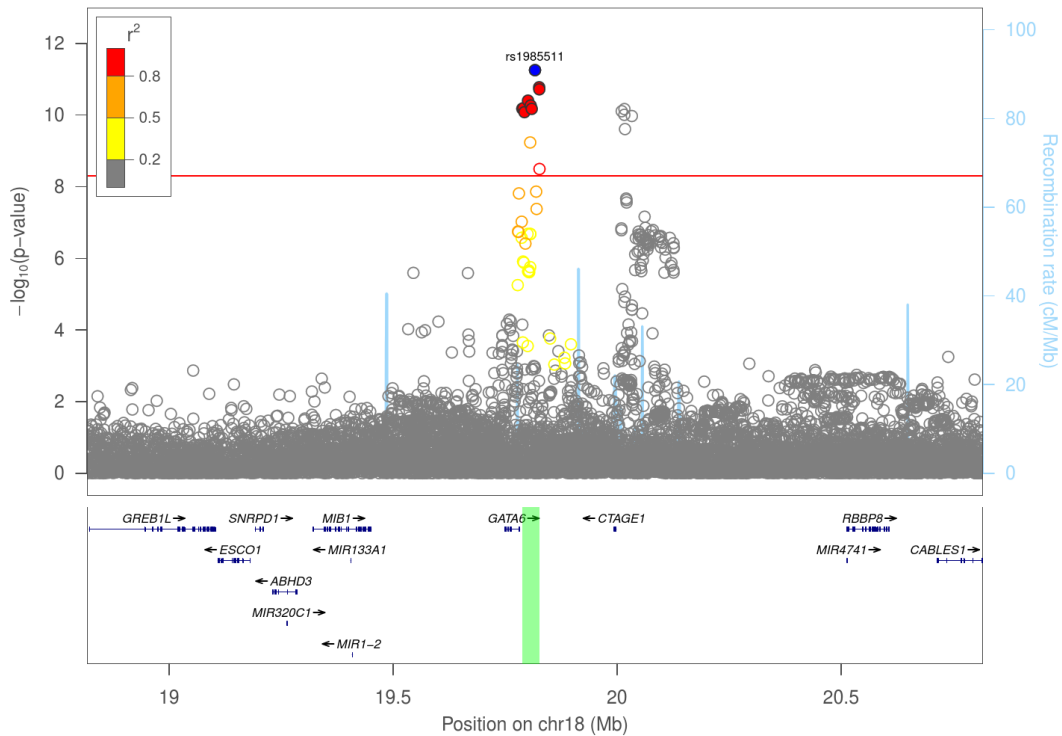

**C18orf8, FVC tier 1 rs303752**

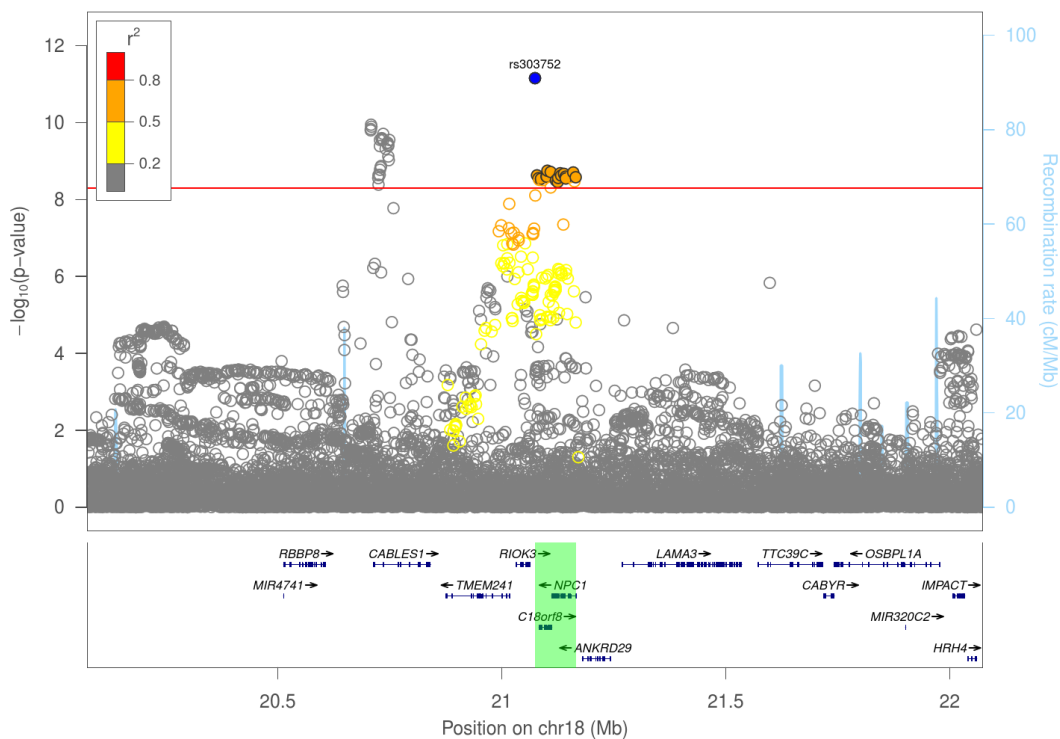

**LOC729950, FVC tier 1 rs1668091**

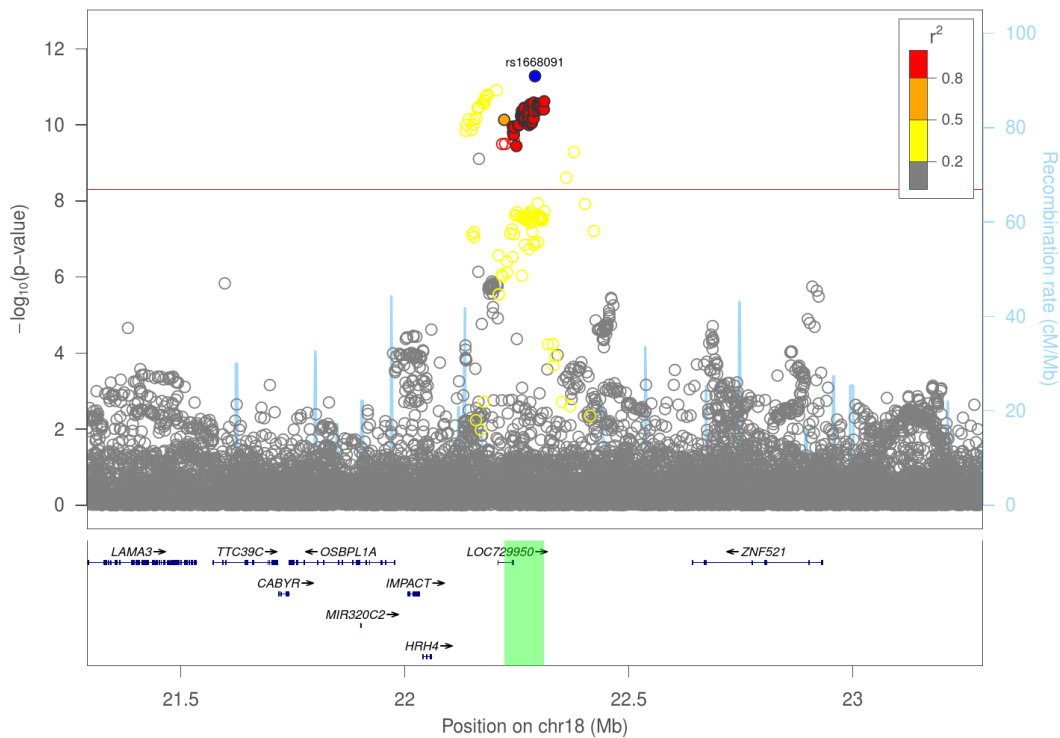

**SLC14A2, FEV<sub>1</sub> tier 1 rs9807668**

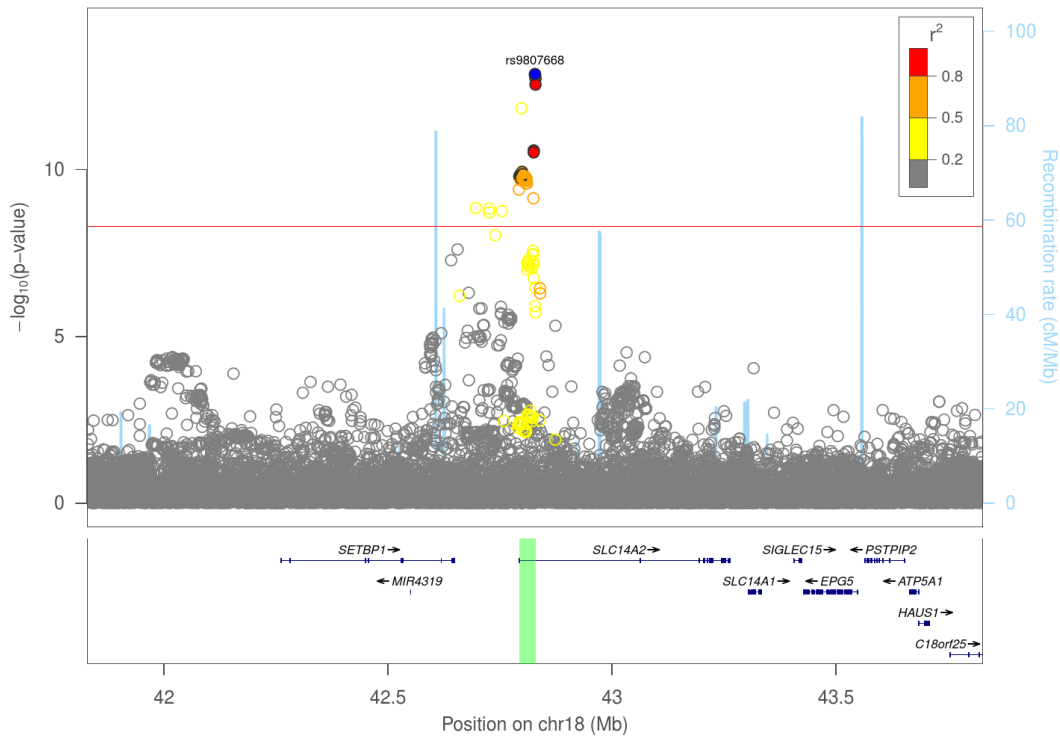

**LOC101927273, FVC tier 2 rs2202572**

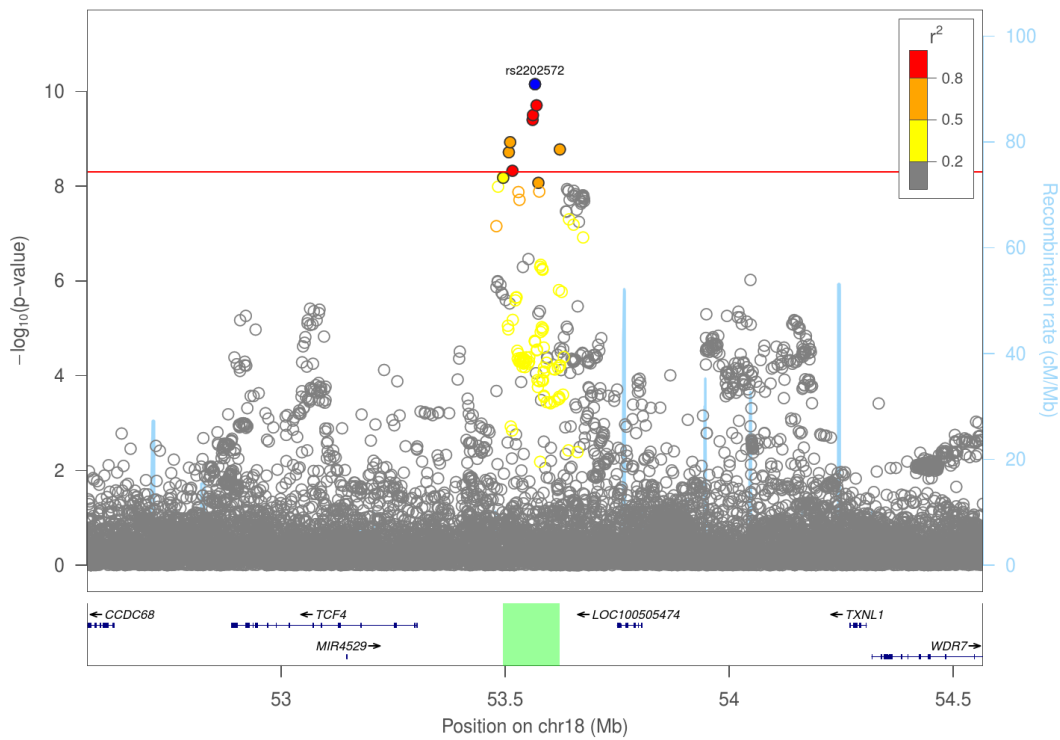

**QTRT1, FEV<sub>1</sub> tier 2 rs11085744**

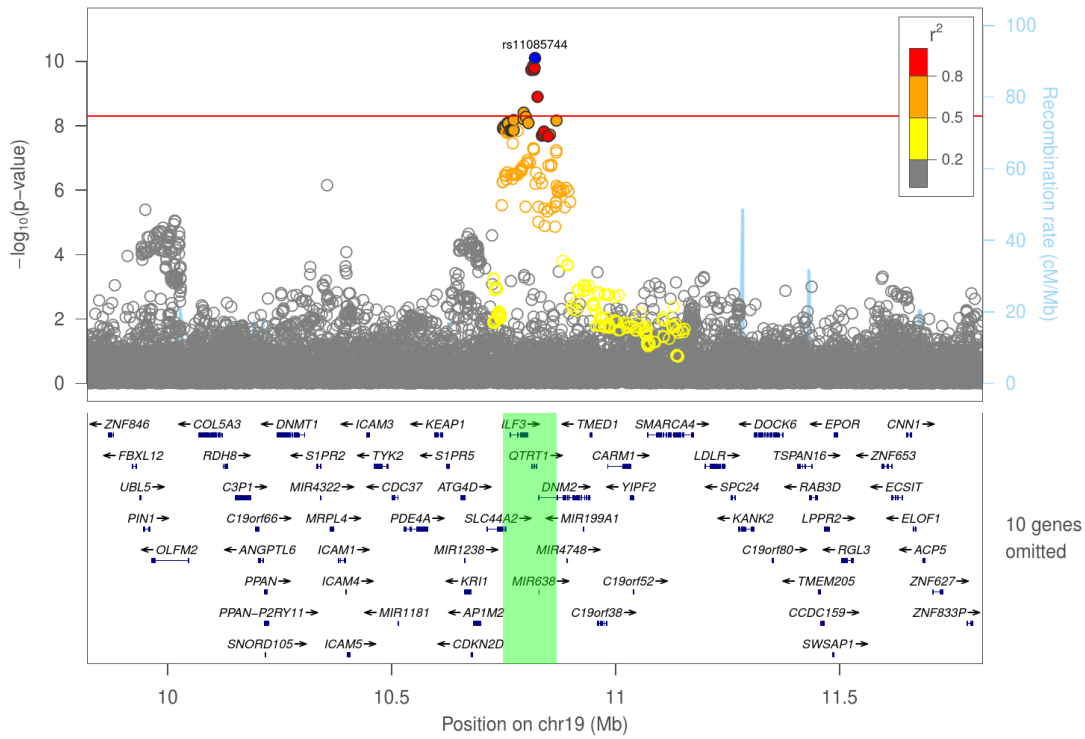

**ZFP82, FVC tier 2 rs2967516**

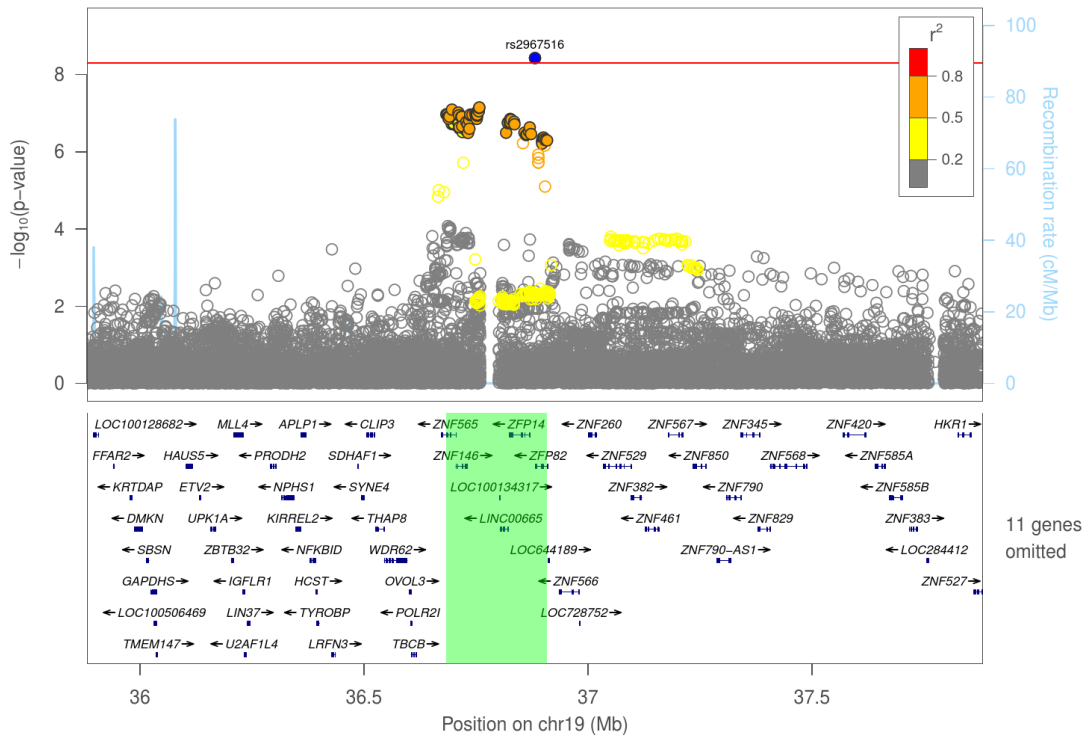



**LOC101929395, FEV<sub>1</sub> tier 2 rs6032942**

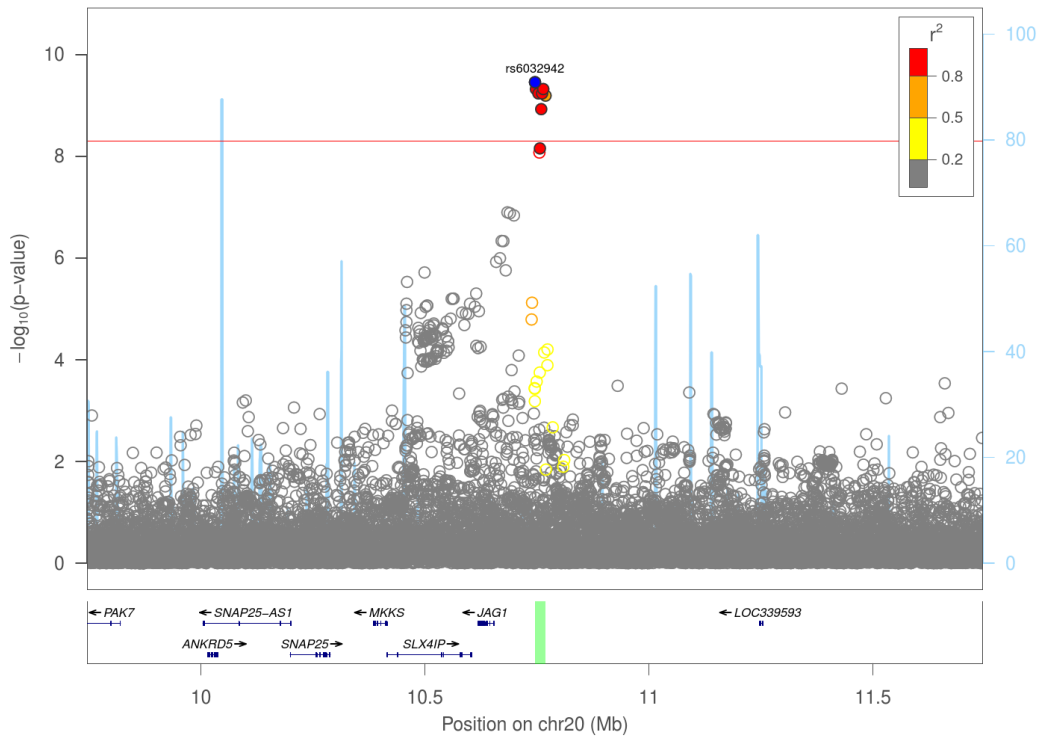

**LINC00649, FEV<sub>1</sub>/FVC tier 1 rs12627254**

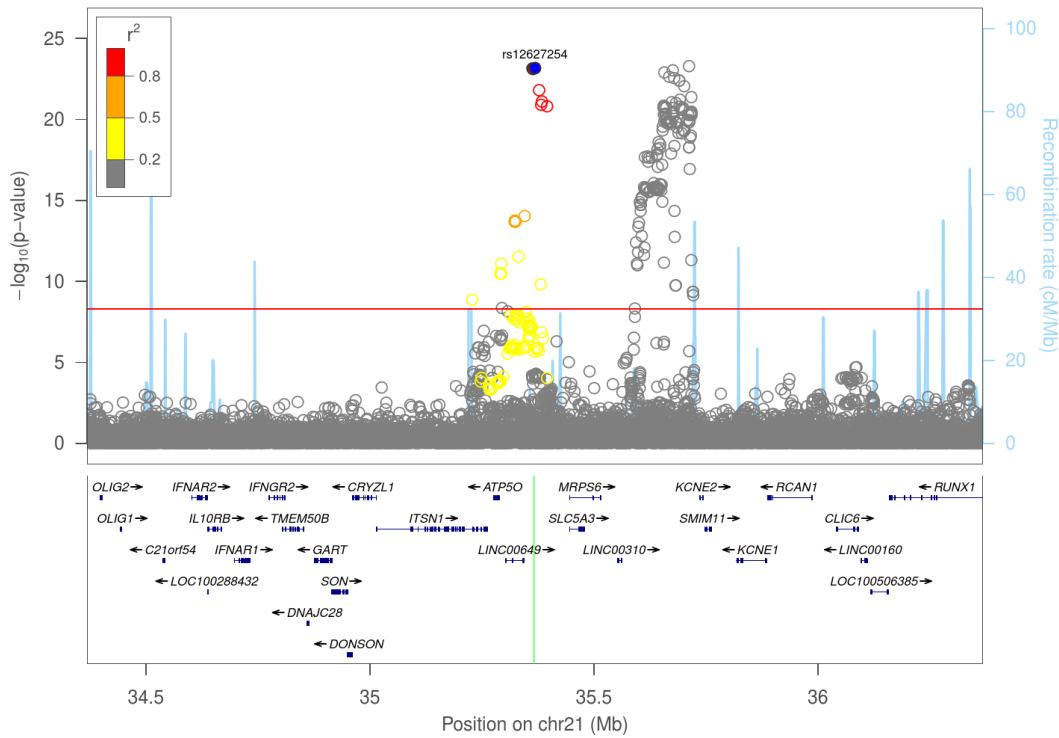

**PPP6R2, FEV<sub>1</sub> tier 2 rs113111175**

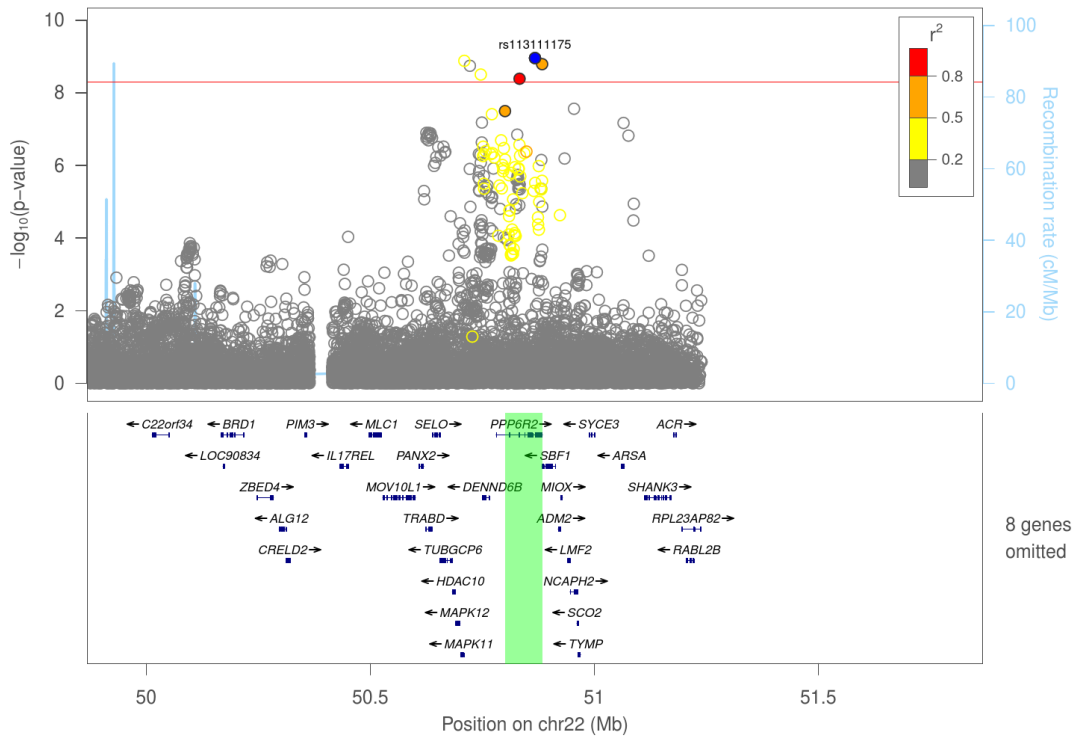

Supplement: NIHMS1514965-supplement-3.pdf [file NIHMS1514965-supplement-3.pdf]
