# Supplementary material
Source: PubMed Central journal article supplement (PMC6397078)

## Region Plots for 140 previous signals of association with lung function

The region plots are from the meta-analysis of UK Biobank and SpiroMeta, from which the effect sizes and standard errors were used to calculate the 99% credible sets. The variants in the 99% credible set are shown as filled circles. The green bar indicates the extent of the credible set. The red line is  $P = 5 \times 10^{-9}$ , used as our discovery threshold in UK Biobank and the meta-analysis.

### Contents

|                                                                                             |    |
|---------------------------------------------------------------------------------------------|----|
| <i>MFAP2</i> , <b>FEV1/FVC</b> previous signal rs2284746, new signal rs9435733 .....        | 5  |
| <i>LOC101929516</i> , <b>FEV1/FVC</b> previous signal rs17513135, new signal rs755249 ..... | 5  |
| <i>TGFBR3</i> , <b>FEV1/FVC</b> previous signal rs1192404, new signal rs1192415 .....       | 6  |
| <i>TGFBR3</i> , <b>FEV1/FVC</b> previous signal rs12140637, new signal rs11165787 .....     | 6  |
| <i>SPAG17</i> , <b>FVC</b> previous signal rs60804050, new signal rs35043843 .....          | 7  |
| <i>MCL1</i> , <b>FVC</b> previous signal rs6681426, new signal rs878471 .....               | 7  |
| <i>NR5A2</i> , <b>FVC</b> previous signal rs2821332, new signal rs2816992 .....             | 8  |
| <i>PIK3C2B</i> , <b>PEF</b> previous signal rs12092943, new signal rs1008833 .....          | 8  |
| <i>CENPF/KCNK2</i> , <b>FVC</b> previous signal rs512597, new signal rs556648 .....         | 9  |
| <i>TGFB2</i> , <b>PEF</b> previous signal rs4846480, new signal rs6604614 .....             | 9  |
| <i>MIR548F3/TGFB2</i> , <b>FEV1</b> previous signal rs993925, new signal rs28613267 .....   | 10 |
| <i>RNU5F-1</i> , <b>FEV1/FVC</b> previous signal rs4328080, new signal rs1338227 .....      | 10 |
| <i>C1orf140/DUSP10</i> , <b>FVC</b> previous signal rs6657854, new signal rs12757436 .....  | 11 |
| <i>CHRM3</i> , <b>PEF</b> previous signal rs6688537, new signal rs2355237 .....             | 11 |
| <i>KCNS3</i> , <b>FEV1/FVC</b> previous signal rs62126408, new signal rs55884799 .....      | 12 |
| <i>EFEMP1</i> , <b>FVC</b> previous signal rs1430193, new signal rs3791679 .....            | 12 |
| <i>CCNT2-AS1</i> , <b>FVC</b> previous signal rs2322659, new signal rs62168891 .....        | 13 |
| <i>LOC101929378</i> , <b>FEV1</b> previous signal rs72904209, new signal rs72902177 .....   | 13 |
| <i>TNS1</i> , <b>FEV1</b> previous signal rs2571445, new signal rs2571445 .....             | 14 |
| <i>PID1</i> , <b>FEV1/FVC</b> previous signal rs10498230, new signal rs62201738 .....       | 14 |
| <i>TRAF3IP1</i> , <b>FEV1</b> previous signal rs61332075, new signal rs6710301 .....        | 15 |
| <i>FLJ43879</i> , <b>FEV1/FVC</b> previous signal rs12477314, new signal rs4308141 .....    | 15 |
| <i>RARB</i> , <b>FEV1/FVC</b> previous signal rs1286664, new signal rs1529672 .....         | 16 |
| <i>RBMS3</i> , <b>FEV1/FVC</b> previous signal rs17666332, new signal rs17666332 .....      | 16 |
| <i>CACNA2D3</i> , <b>FEV1/FVC</b> previous signal rs1458979, new signal rs12715478 .....    | 17 |
| <i>SLMAP</i> , <b>FEV1</b> previous signal rs79294353, new signal rs6445932 .....           | 17 |
| <i>SUCLG2</i> , <b>FEV1</b> previous signal rs1490265, new signal rs4132748 .....           | 18 |
| <i>DCBLD2</i> , <b>FVC</b> previous signal rs6778584, new signal rs12497779 .....           | 18 |
| <i>EEFSEC</i> , <b>FEV1/FVC</b> previous signal rs2811415, new signal rs2999090 .....       | 19 |
| <i>RSRC1</i> , <b>FVC</b> previous signal rs1595029, new signal rs12634907 .....            | 19 |

|                                                                                  |    |
|----------------------------------------------------------------------------------|----|
| <i>LOC100507661, FEV1</i> previous signal rs56341938, new signal rs879394 .....  | 20 |
| <i>MECOM, FEV1</i> previous signal rs1344555, new signal rs78101726.....         | 20 |
| <i>AFAP1, FEV1/FVC</i> previous signal rs28520091, new signal rs62289340 .....   | 21 |
| <i>FAM13A, FEV1/FVC</i> previous signal rs13110699, new signal rs2609279 .....   | 21 |
| <i>FAM13A, FEV1/FVC</i> previous signal rs2045517, new signal rs2869966.....     | 22 |
| <i>TET2, FEV1/FVC</i> previous signal rs2007403, new signal rs6533183.....       | 22 |
| <i>GSTCD, FEV1</i> previous signal rs10516526, new signal rs11722225 .....       | 23 |
| <i>NPNT, FEV1/FVC</i> previous signal rs34712979, new signal rs34712979.....     | 23 |
| <i>HHIP-AS1, FEV1/FVC</i> previous signal rs12504628, new signal rs13141641..... | 24 |
| <i>OTUD4/SMAD1, PEF</i> previous signal rs111898810, new signal rs2353940.....   | 24 |
| <i>TARS, FVC</i> previous signal rs91731, new signal rs268717 .....              | 25 |
| <i>FGF10, FVC</i> previous signal rs1448044, new signal rs6859730 .....          | 25 |
| <i>ITGA1, FEV1/FVC</i> previous signal rs1551943, new signal rs12522114.....     | 26 |
| <i>ARL15, FVC</i> previous signal rs2441026, new signal rs2441026.....           | 26 |
| <i>AP3B1, FVC</i> previous signal rs72776440, new signal rs425102.....           | 27 |
| <i>SPATA9, FEV1/FVC</i> previous signal rs153916, new signal rs987068.....       | 27 |
| <i>P4HA2-AS1, FVC</i> previous signal rs7713065, new signal rs3843503 .....      | 28 |
| <i>HTR4, FEV1/FVC</i> previous signal rs7715901, new signal rs7733410 .....      | 28 |
| <i>ABLIM3, FEV1</i> previous signal rs2014787, new signal rs11952673.....        | 29 |
| <i>CYFIP2, FEV1/FVC</i> previous signal rs10515750, new signal rs11134766.....   | 29 |
| <i>ADAM19, FEV1/FVC</i> previous signal rs1990950, new signal rs11134789 .....   | 30 |
| <i>LY86, FEV1/FVC</i> previous signal rs1294421, new signal rs1294417 .....      | 30 |
| <i>DSP, FEV1/FVC</i> previous signal rs55938083, new signal rs2076295.....       | 31 |
| <i>BMP6, FVC</i> previous signal rs6924424, new signal rs10498672.....           | 31 |
| <i>CASC15, FEV1/FVC</i> previous signal rs1928168, new signal rs13198081.....    | 32 |
| <i>ZNF184, PEF</i> previous signal rs34864796, new signal rs7752448 .....        | 32 |
| <i>AGER, FEV1/FVC</i> previous signal rs2070600, new signal rs2070600 .....      | 33 |
| <i>HLA-DQB1, FEV1/FVC</i> previous signal rs3844313, new signal rs9274247 .....  | 33 |
| <i>KCNQ5, FEV1/FVC</i> previous signal rs16883089, new signal rs13206405 .....   | 34 |
| <i>ARMC2, FEV1/FVC</i> previous signal rs2768551, new signal rs2798641 .....     | 34 |
| <i>MIR588, FVC</i> previous signal rs11759026, new signal rs6918725.....         | 35 |
| <i>GPR126, FEV1/FVC</i> previous signal rs148274477, new signal rs17280293.....  | 35 |
| <i>GPR126, FEV1/FVC</i> previous signal rs7753012, new signal rs7753012.....     | 36 |
| <i>C1GALT1, FEV1/FVC</i> previous signal rs10246303, new signal rs4318980.....   | 36 |
| <i>AGMO, FVC</i> previous signal rs55905169, new signal rs4721442 .....          | 37 |
| <i>ZKSCAN1, FEV1/FVC</i> previous signal rs72615157, new signal rs2261360 .....  | 37 |
| <i>LOC285889, FEV1</i> previous signal rs12698403, new signal rs12698403.....    | 38 |
| <i>DMRT2/SMARCA2, FVC</i> previous signal rs771924, new signal rs771662.....     | 38 |

|                                                                                         |    |
|-----------------------------------------------------------------------------------------|----|
| <i>GLIS3, FEV1/FVC</i> previous signal rs7872188, new signal rs1570203 .....            | 39 |
| <i>FLJ35282/ELAVL2, FEV1/FVC</i> previous signal rs10965947, new signal rs1107677 ..... | 39 |
| <i>PTCH1, FEV1/FVC</i> previous signal rs16909859, new signal rs28446321 .....          | 40 |
| <i>TMEM38B/ZNF462, FEV1/FVC</i> previous signal rs2451951, new signal rs1491106 .....   | 40 |
| <i>ASTN2, FEV1/FVC</i> previous signal rs803923, new signal rs10983184 .....            | 41 |
| <i>QSOX2, FVC</i> previous signal rs10858246, new signal rs7024579 .....                | 41 |
| <i>DNLZ, FVC</i> previous signal rs10870202, new signal rs4073153 .....                 | 42 |
| <i>CDC123, FEV1/FVC</i> previous signal rs7090277, new signal rs7090277 .....           | 42 |
| <i>KIAA1462, PEF</i> previous signal rs3847402, new signal rs7914842 .....              | 43 |
| <i>JMJD1C, FEV1</i> previous signal rs7899503, new signal rs7082066 .....               | 43 |
| <i>MYPN, FVC</i> previous signal rs7095607, new signal rs10998018 .....                 | 44 |
| <i>CAMK2G, FEV1</i> previous signal rs3849969, new signal rs7098573 .....               | 44 |
| <i>COMTD1/ZNF503-AS1, FVC</i> previous signal rs1259524, new signal rs1259605 .....     | 45 |
| <i>C10orf11, FEV1</i> previous signal rs2637254, new signal rs2637254 .....             | 45 |
| <i>SFTPD, FEV1/FVC</i> previous signal rs2256462, new signal rs721917 .....             | 46 |
| <i>HTRA1, FEV1/FVC</i> previous signal rs2293871, new signal rs4279944 .....            | 46 |
| <i>HSD17B12, FVC</i> previous signal rs4237643, new signal rs17596617 .....             | 47 |
| <i>PRDM11, FEV1</i> previous signal rs2863171, new signal rs10838435 .....              | 47 |
| <i>EML3, FEV1</i> previous signal rs2509961, new signal rs71490394 .....                | 48 |
| <i>ARHGEF17, FEV1/FVC</i> previous signal rs11235809, new signal rs2027761 .....        | 48 |
| <i>PRSS23, FEV1/FVC</i> previous signal rs7108254, new signal rs11234768 .....          | 49 |
| <i>RPUSD4, FEV1/FVC</i> previous signal rs567508, new signal rs541601 .....             | 49 |
| <i>CCDC91, FVC</i> previous signal rs2348418, new signal rs7977418 .....                | 50 |
| <i>RAB5B, FEV1</i> previous signal rs772920, new signal rs1689510 .....                 | 50 |
| <i>LRP1, FEV1/FVC</i> previous signal rs11172113, new signal rs11172113 .....           | 51 |
| <i>MSTRB3, FEV1</i> previous signal rs1494502, new signal rs12825748 .....              | 51 |
| <i>ALX1/RASSF9, PEF</i> previous signal rs7971039, new signal rs56390486 .....          | 52 |
| <i>CRADD, FVC</i> previous signal rs11107184, new signal rs9788269 .....                | 52 |
| <i>FGD6, FEV1/FVC</i> previous signal rs113745635, new signal rs113745635 .....         | 53 |
| <i>SNRPF, FEV1/FVC</i> previous signal rs12820313, new signal rs7970544 .....           | 53 |
| <i>TBX3, FEV1</i> previous signal rs10850377, new signal rs10850377 .....               | 54 |
| <i>TBX3, FVC</i> previous signal rs35506, new signal rs35505 .....                      | 54 |
| <i>BMP4, FEV1/FVC</i> previous signal rs4444235, new signal rs35107139 .....            | 55 |
| <i>LINC00911, FEV1/FVC</i> previous signal rs1698268, new signal rs1756281 .....        | 55 |
| <i>TRIP11, FEV1</i> previous signal rs7155279, new signal rs11160037 .....              | 56 |
| <i>RIN3, FVC</i> previous signal rs72699866, new signal rs11621587 .....                | 56 |
| <i>RPAP1, FEV1/FVC</i> previous signal rs1200345, new signal rs2012453 .....            | 57 |
| <i>MGA, FEV1/FVC</i> previous signal rs72724130, new signal rs56383987 .....            | 57 |

|                                                                                          |    |
|------------------------------------------------------------------------------------------|----|
| <i>AAGAB</i> , <b>FVC</b> previous signal rs8025774, new signal rs12917612 .....         | 58 |
| <i>THSD4</i> , <b>FEV1/FVC</b> previous signal rs10851839, new signal rs1441358 .....    | 58 |
| <i>THSD4</i> , <b>FEV1</b> previous signal rs12591467, new signal rs62015883 .....       | 59 |
| <i>SH3GL3</i> , <b>FEV1/FVC</b> previous signal rs12438269, new signal rs1896797 .....   | 59 |
| <i>TEKT5</i> , <b>FEV1/FVC</b> previous signal rs12149593, new signal rs78442819 .....   | 60 |
| <i>IL27</i> , <b>FEV1</b> previous signal rs181206, new signal rs12446589 .....          | 60 |
| <i>MMP15</i> , <b>FEV1/FVC</b> previous signal rs12447804, new signal rs11648508 .....   | 61 |
| <i>WWP2</i> , <b>FEV1</b> previous signal rs3973397, new signal rs8047194 .....          | 61 |
| <i>CFDP1</i> , <b>FEV1/FVC</b> previous signal rs3743609, new signal rs11858992 .....    | 62 |
| <i>WVOX</i> , <b>FEV1</b> previous signal rs1079572, new signal rs2345443 .....          | 62 |
| <i>SSH2</i> , <b>FEV1/FVC</b> previous signal rs62070270, new signal rs2244592 .....     | 63 |
| <i>SUZ12P1</i> , <b>FVC</b> previous signal rs62070631, new signal rs62070648 .....      | 63 |
| <i>PSMB3</i> , <b>FEV1/FVC</b> previous signal rs11658500, new signal rs35246838 .....   | 64 |
| <i>FBXL20</i> , <b>FVC</b> previous signal rs8067511, new signal rs8069451 .....         | 64 |
| <i>MAPT-AS1</i> , <b>FEV1</b> previous signal rs17577877, new signal rs79412431 .....    | 65 |
| <i>CASC17</i> , <b>FVC</b> previous signal rs6501431, new signal rs6501431 .....         | 65 |
| <i>CASC17</i> , <b>FEV1</b> previous signal rs1859962, new signal rs6501455 .....        | 66 |
| <i>TSEN54</i> , <b>FEV1</b> previous signal rs7218675, new signal rs9892893 .....        | 66 |
| <i>MTCL1</i> , <b>FEV1</b> previous signal rs633286, new signal rs513953 .....           | 67 |
| <i>CTAGE1/RBBP8</i> , <b>FEV1</b> previous signal rs7243351, new signal rs11082051 ..... | 67 |
| <i>CABLES1</i> , <b>FEV1</b> previous signal rs7238093, new signal rs9947743 .....       | 68 |
| <i>DCC</i> , <b>FVC</b> previous signal rs8089865, new signal rs12607758 .....           | 68 |
| <i>TSHZ3</i> , <b>FEV1/FVC</b> previous signal rs9636166, new signal rs9636166 .....     | 69 |
| <i>LTBP4</i> , <b>FEV1/FVC</b> previous signal rs113473882, new signal rs34093919 .....  | 69 |
| <i>BMP2</i> , <b>FVC</b> previous signal rs6140050, new signal rs2145272 .....           | 70 |
| <i>ABHD12</i> , <b>FEV1</b> previous signal rs6138639, new signal rs2236180 .....        | 70 |
| <i>C20orf112</i> , <b>FEV1/FVC</b> previous signal rs1737889, new signal rs4413223 ..... | 71 |
| <i>UQCC1</i> , <b>FVC</b> previous signal rs6088813, new signal rs143384 .....           | 71 |
| <i>EYA2</i> , <b>FVC</b> previous signal rs2236519, new signal rs12481092 .....          | 72 |
| <i>SLC2A4RG</i> , <b>FVC</b> previous signal rs6062304, new signal rs4809221 .....       | 72 |
| <i>KCNE2</i> , <b>FEV1/FVC</b> previous signal rs2834440, new signal rs62213732 .....    | 73 |
| <i>MICAL3</i> , <b>FEV1</b> previous signal rs11704827, new signal rs1978968 .....       | 73 |
| <i>SCARF2</i> , <b>FEV1</b> previous signal rs4820216, new signal rs9610955 .....        | 74 |
| <i>MN1</i> , <b>FEV1/FVC</b> previous signal rs2283847, new signal rs2283847 .....       | 74 |



**MFAP2, FEV<sub>1</sub>/FVC previous signal rs2284746, new signal rs9435733**

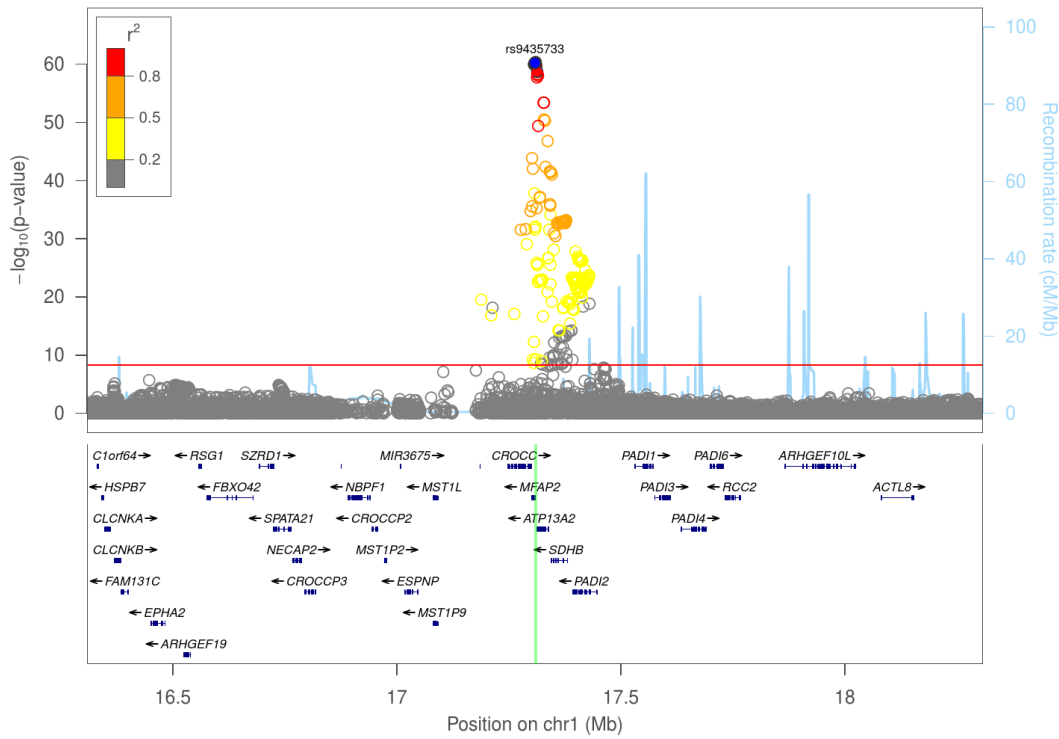

**LOC101929516, FEV<sub>1</sub>/FVC previous signal rs17513135, new signal rs755249**

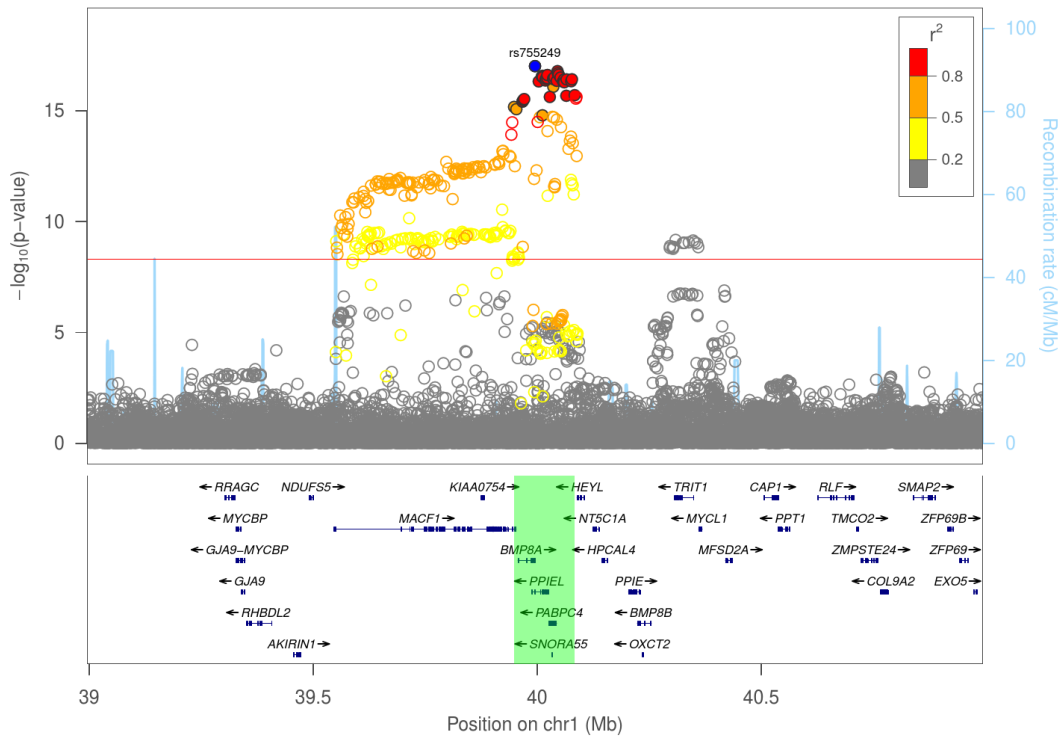

**TGFBR3, FEV<sub>1</sub>/FVC previous signal rs1192404, new signal rs1192415**

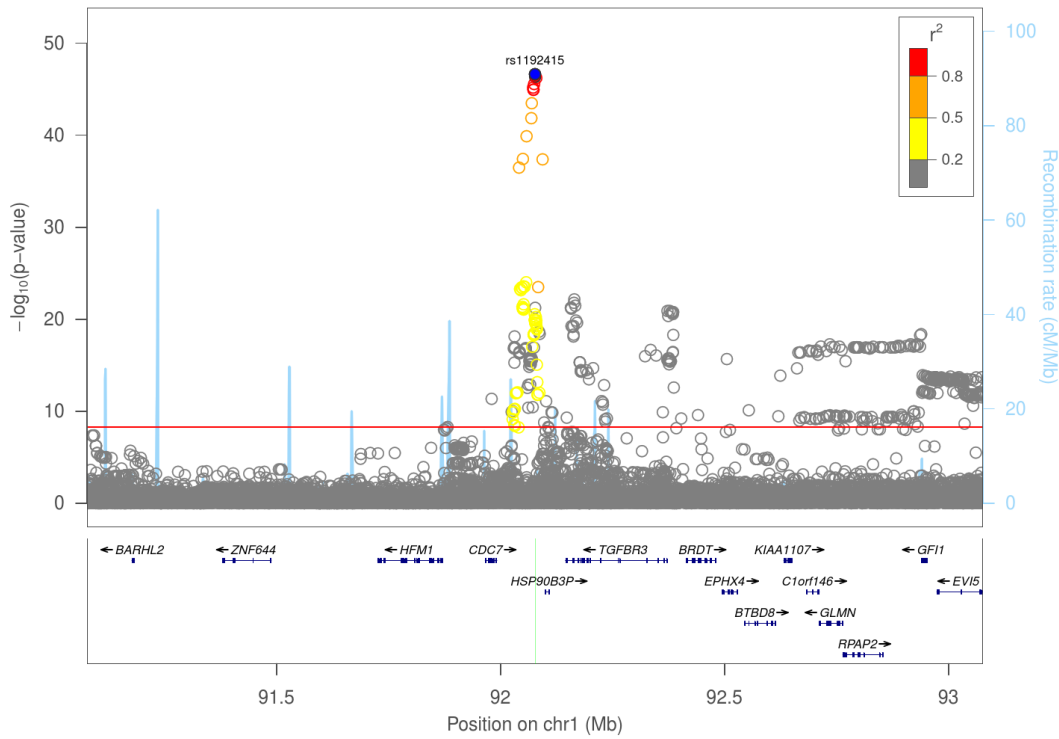

**TGFBR3, FEV<sub>1</sub>/FVC previous signal rs12140637, new signal rs11165787**

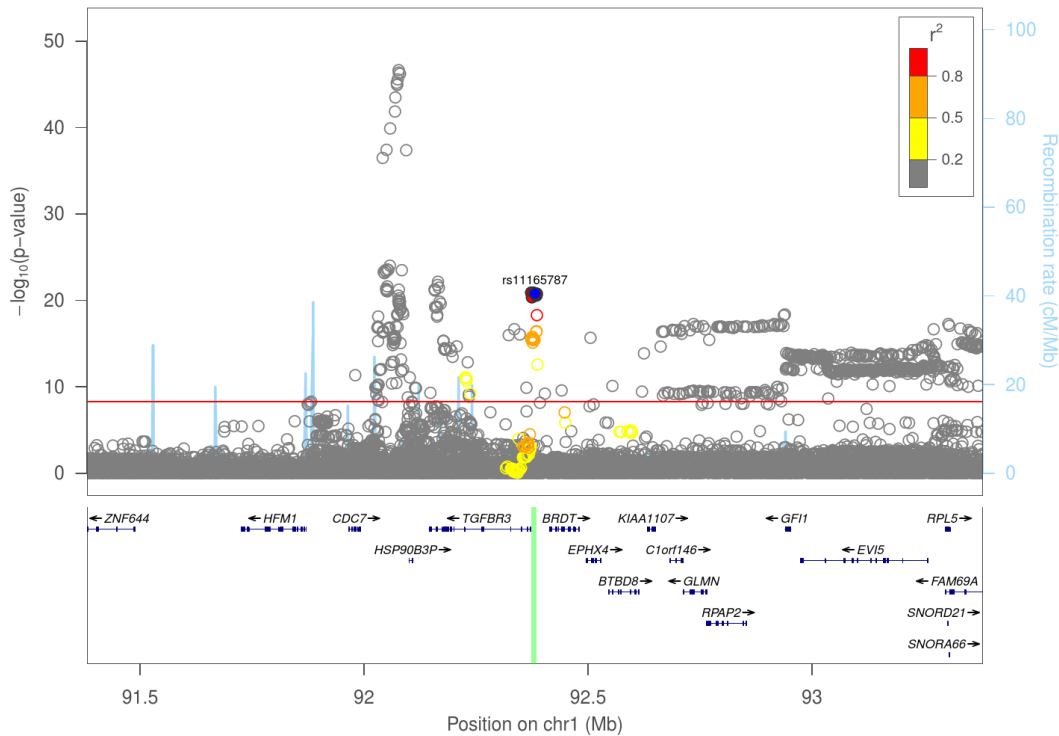

**SPAG17, FVC previous signal rs60804050, new signal rs35043843**

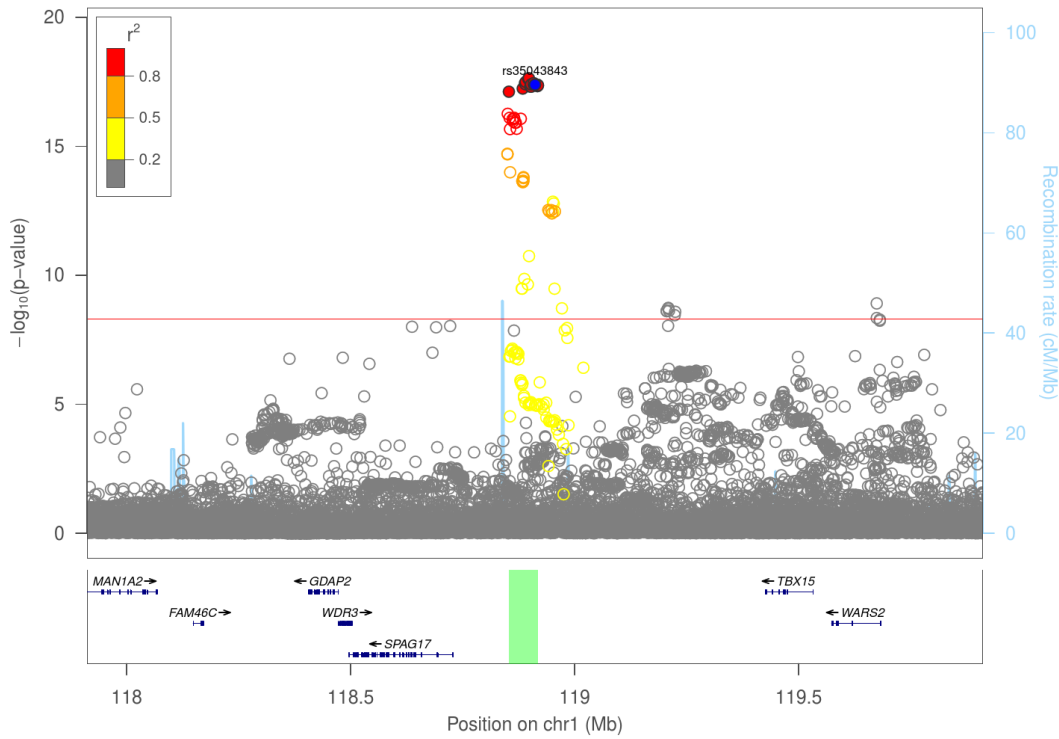

**MCL1, FVC previous signal rs6681426, new signal rs878471**

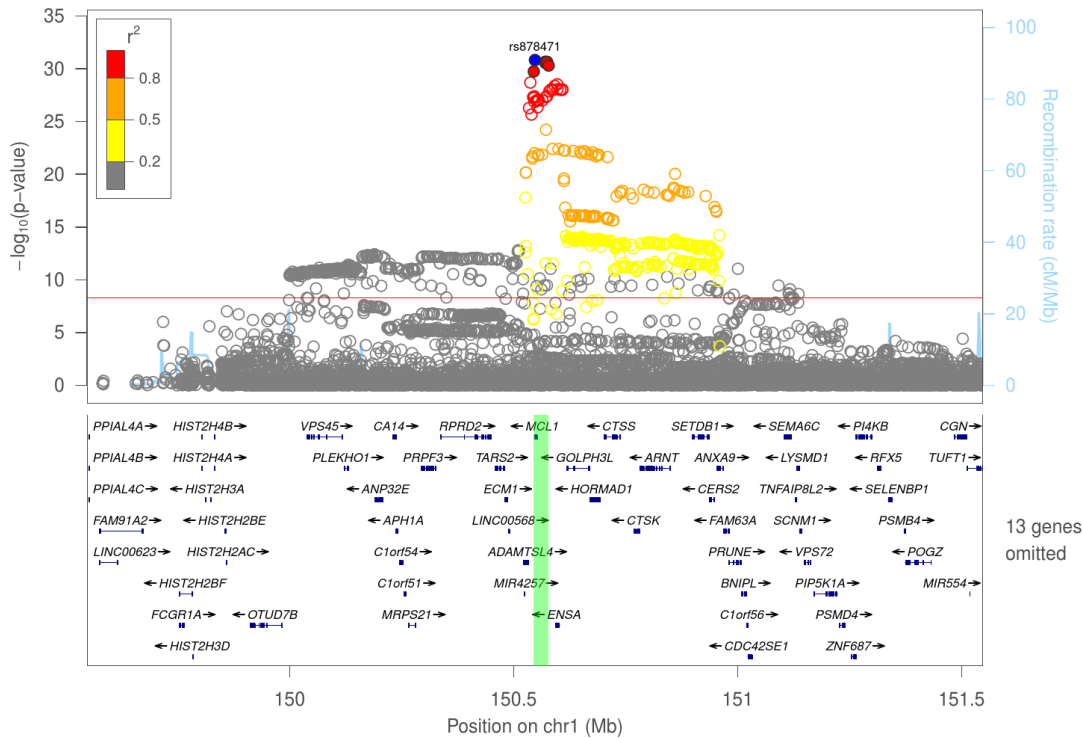

**NR5A2, FVC** previous signal rs2821332, new signal rs2816992

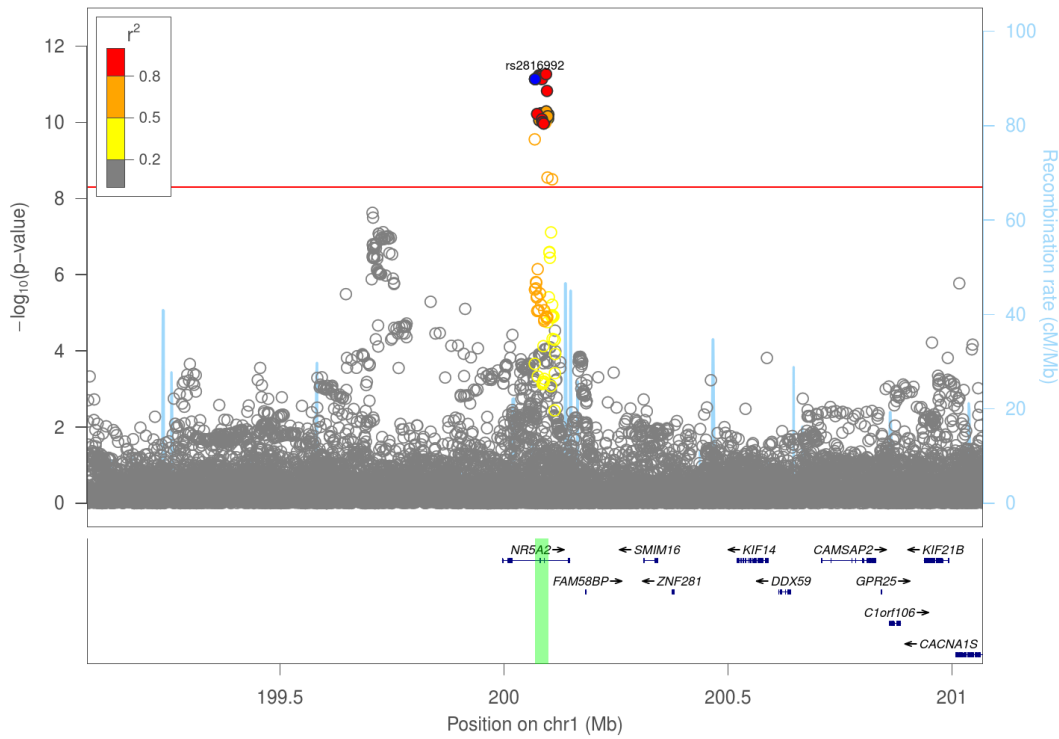

**PIK3C2B, PEF** previous signal rs12092943, new signal rs1008833

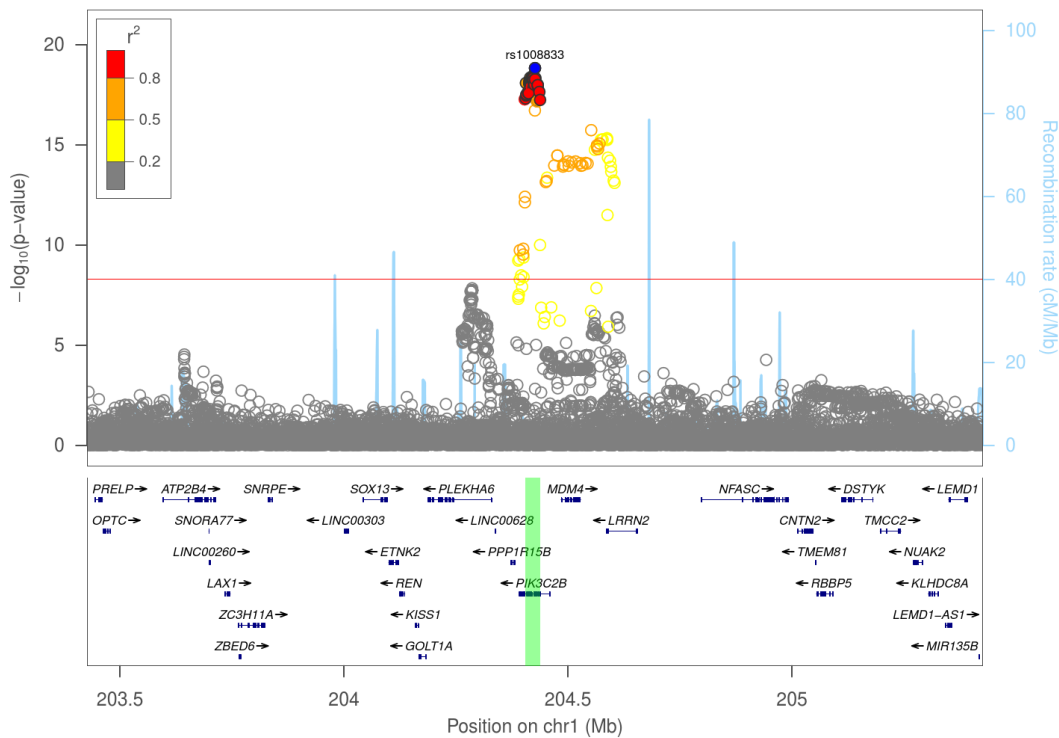

**CENPF/KCNK2, FVC** previous signal rs512597, new signal rs556648

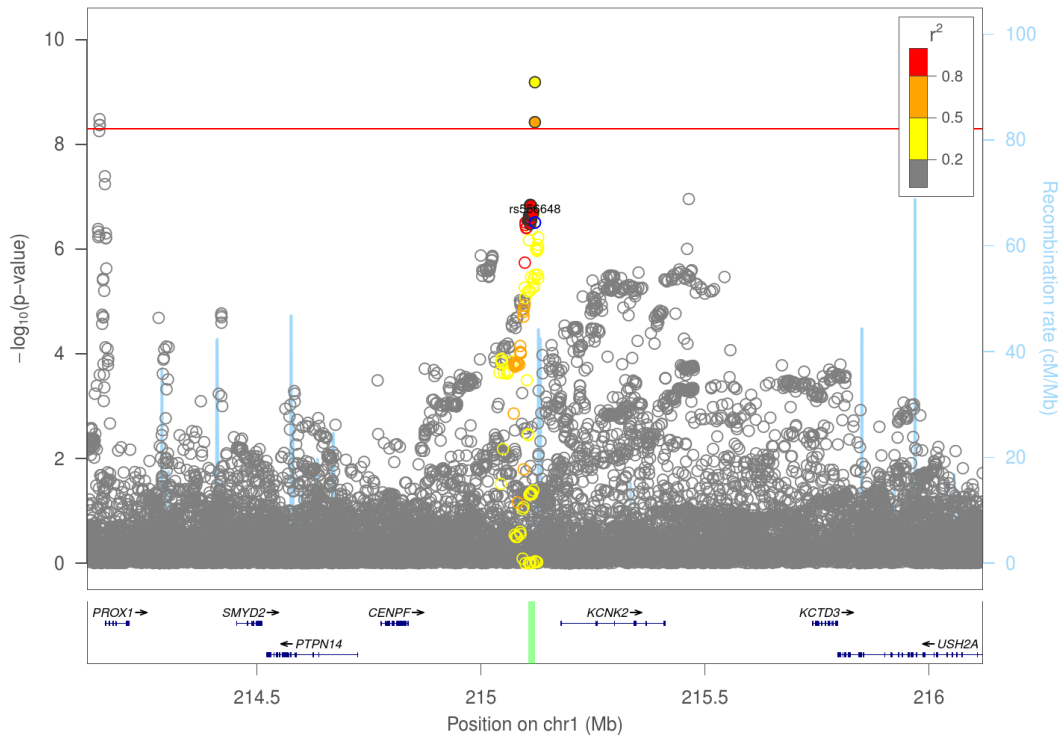

**TGFB2, PEF** previous signal rs4846480, new signal rs6604614

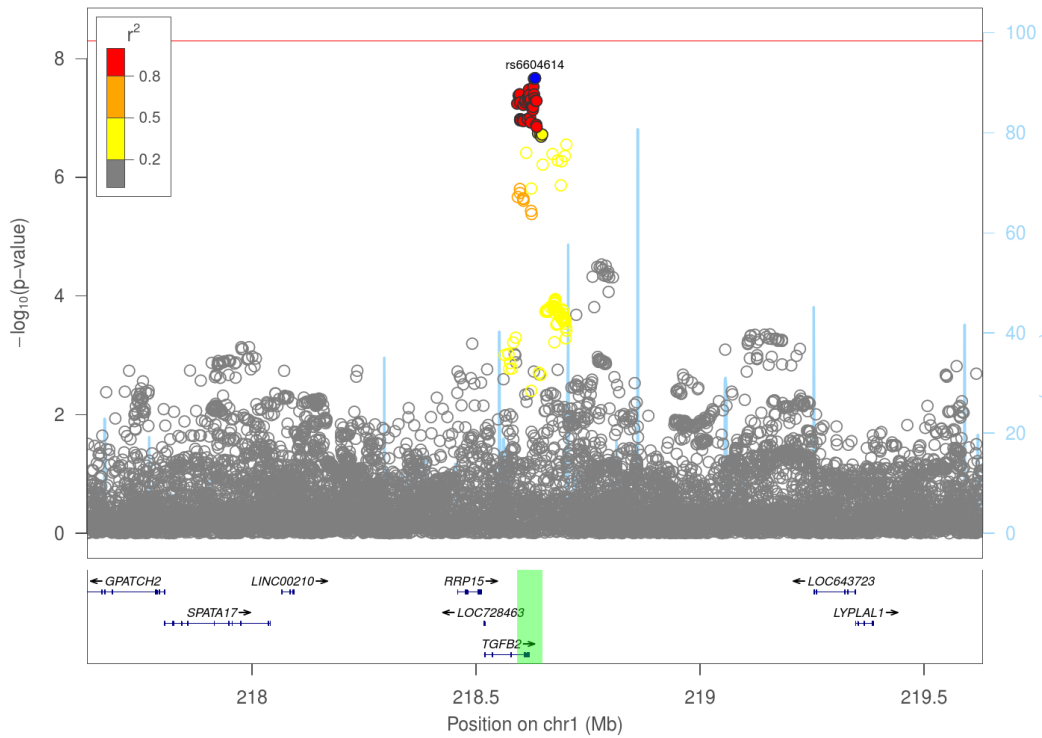

**MIR548F3/TGFB2, FEV<sub>1</sub> previous signal rs993925, new signal rs28613267**

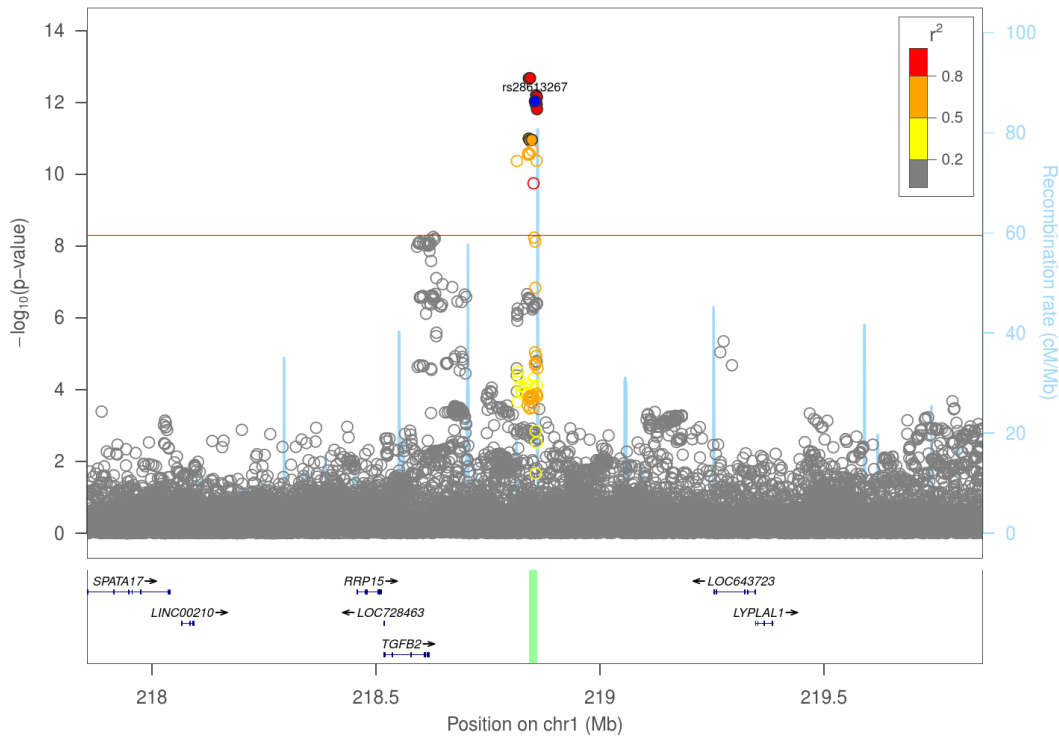

**RNU5F-1, FEV<sub>1</sub>/FVC previous signal rs4328080, new signal rs1338227**

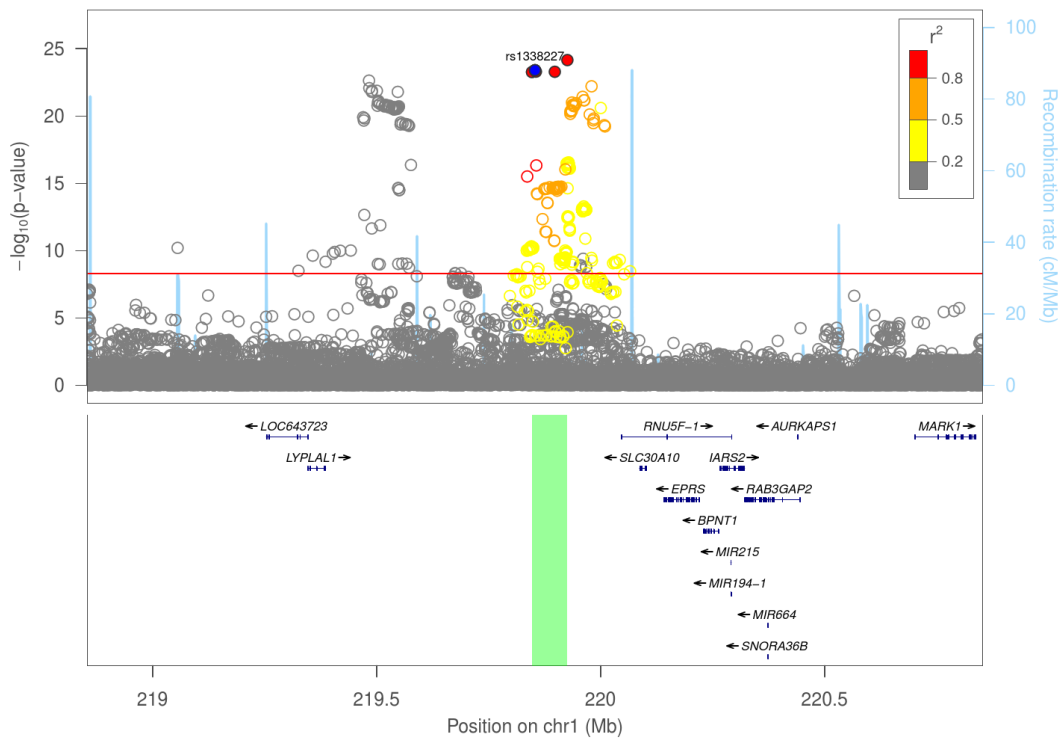

***C1orf140/DUSP10, FVC* previous signal rs6657854, new signal rs12757436**

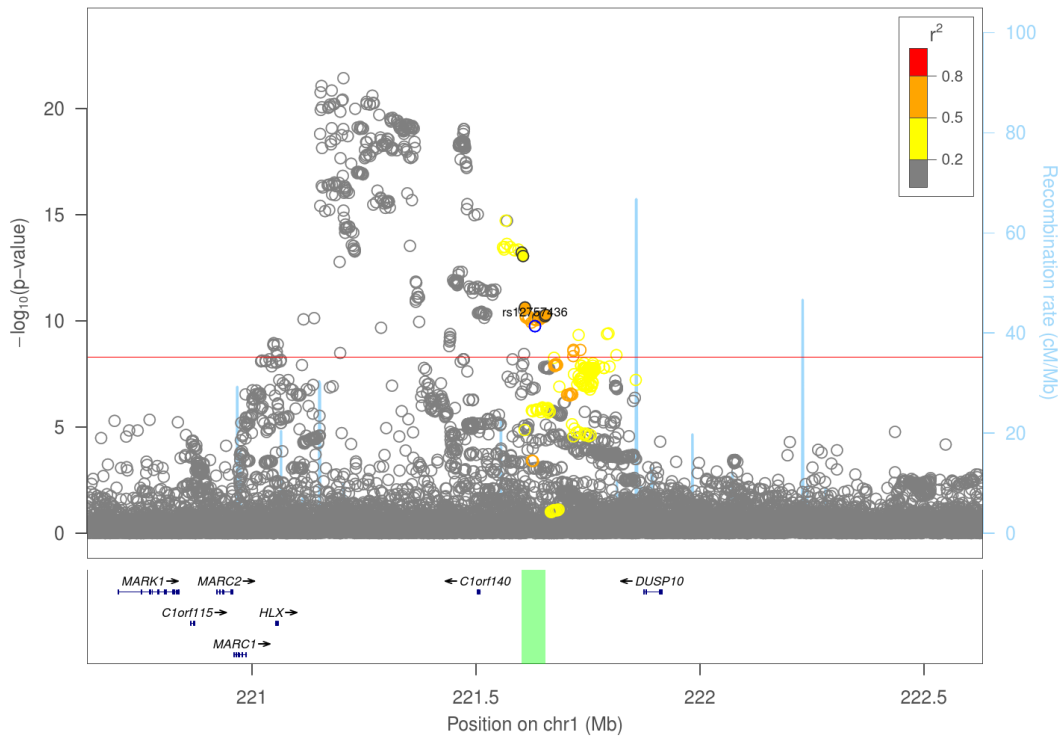

***CHRM3, PEF* previous signal rs6688537, new signal rs2355237**

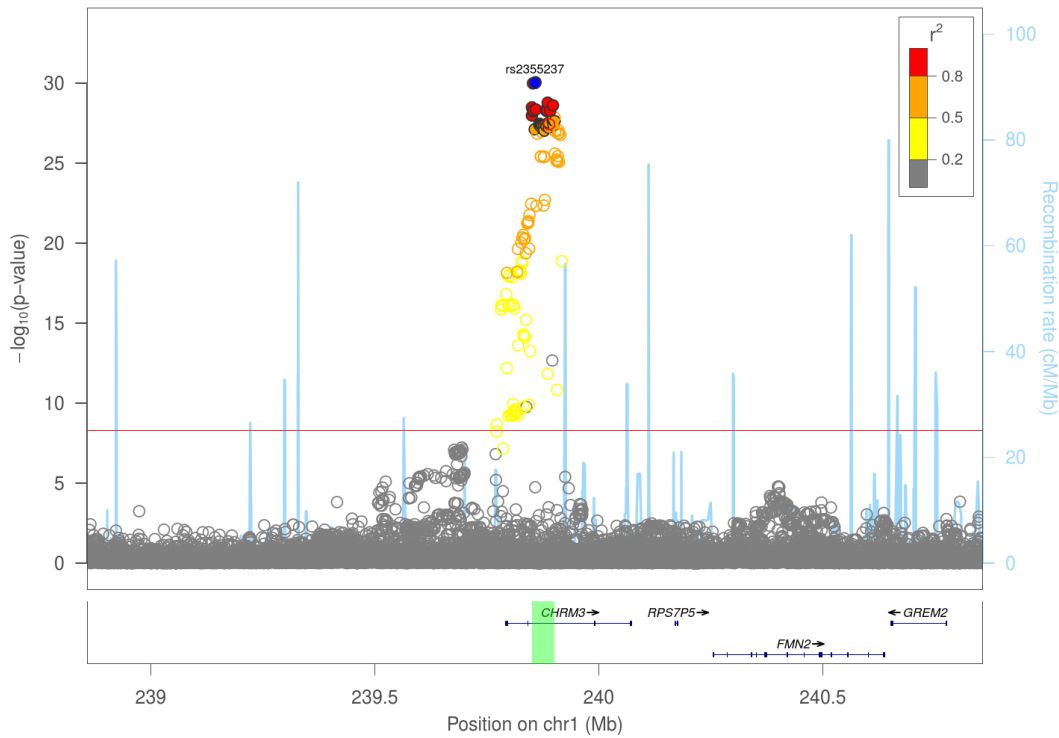

**KCNS3, FEV<sub>1</sub>/FVC previous signal rs62126408, new signal rs55884799**

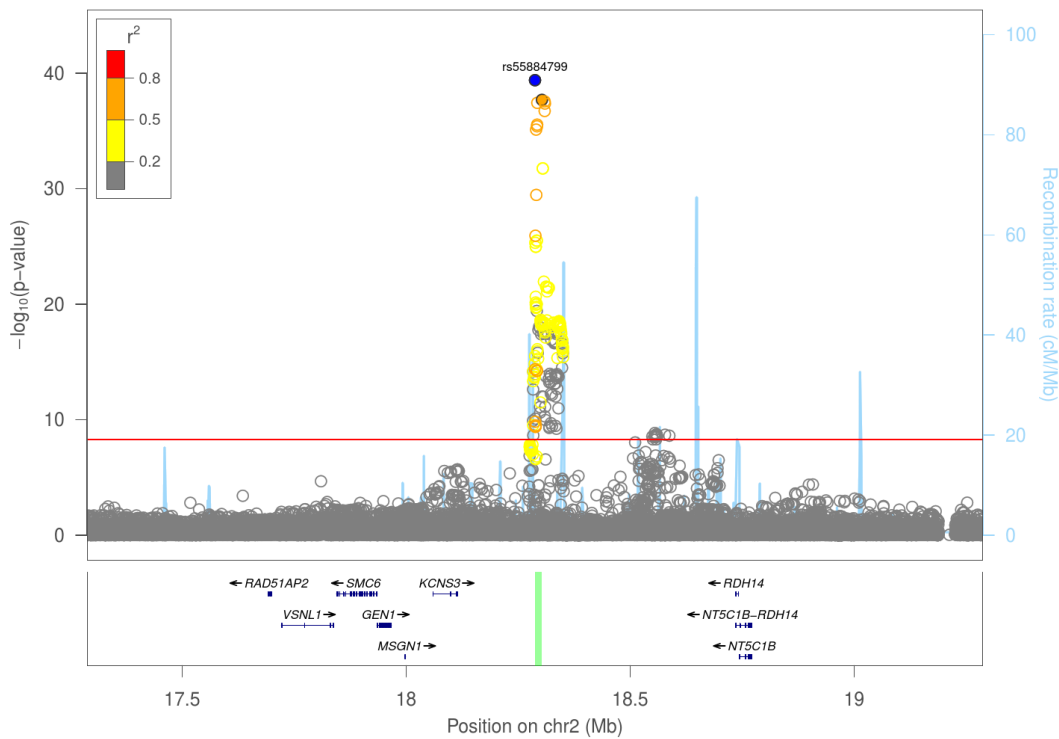

**EFEMP1, FVC previous signal rs1430193, new signal rs3791679**

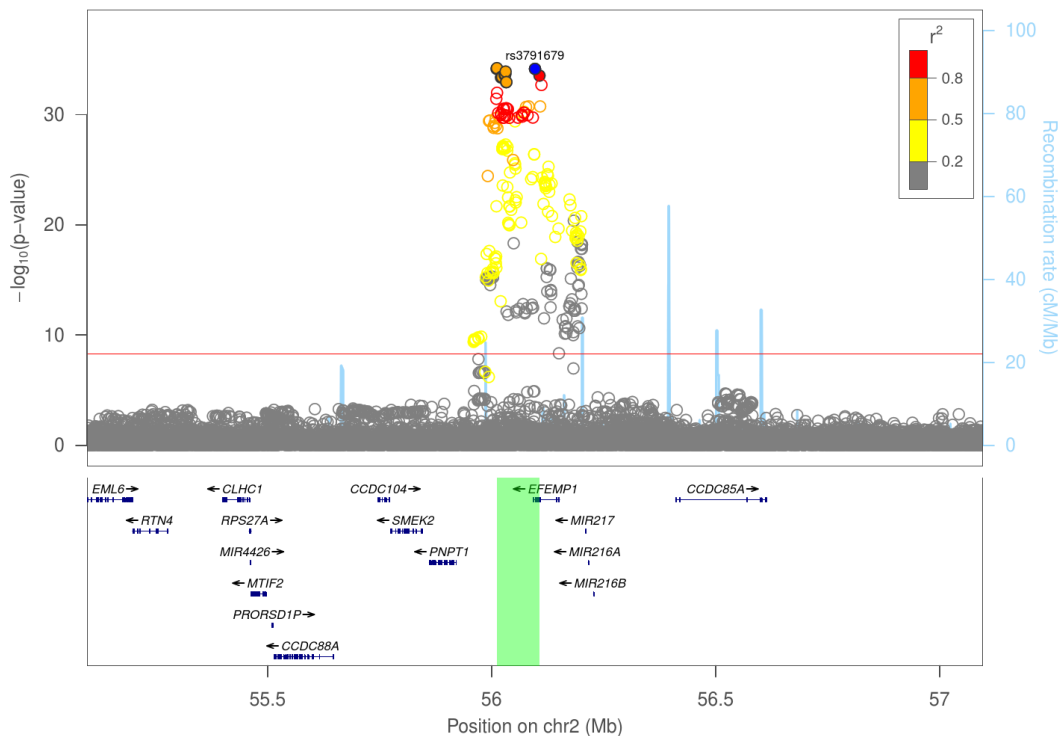



**CCNT2-AS1, FVC** previous signal rs2322659, new signal rs62168891

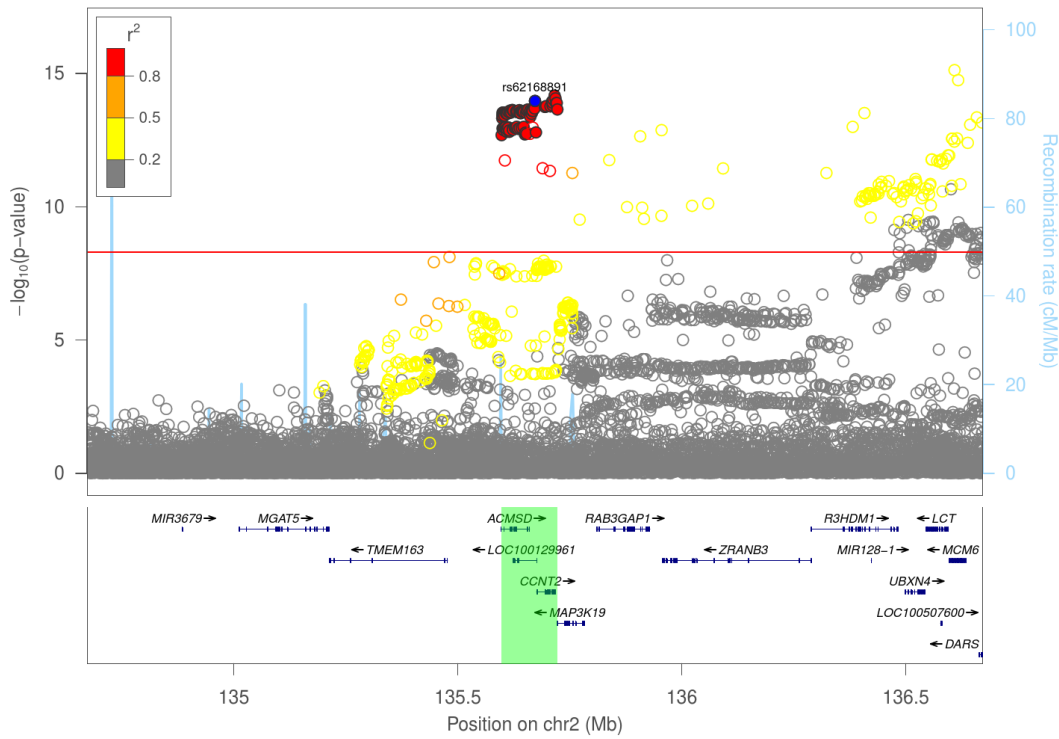

**LOC101929378, FEV<sub>1</sub>** previous signal rs72904209, new signal rs72902177

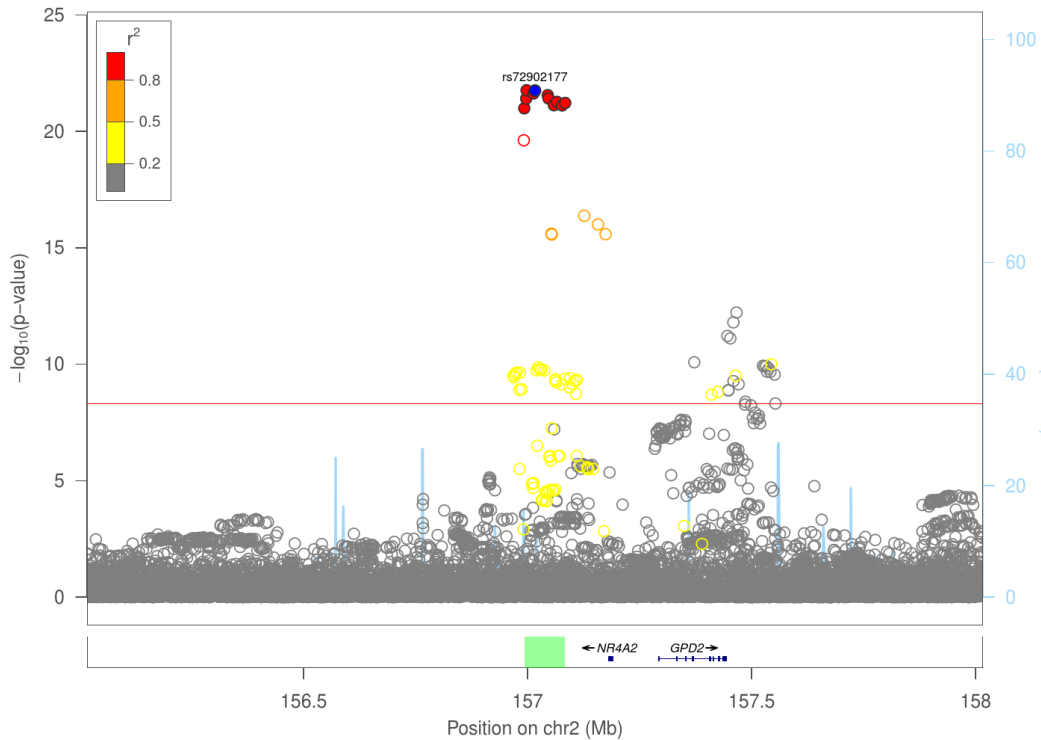

**TNS1, FEV<sub>1</sub> previous signal rs2571445, new signal rs2571445**

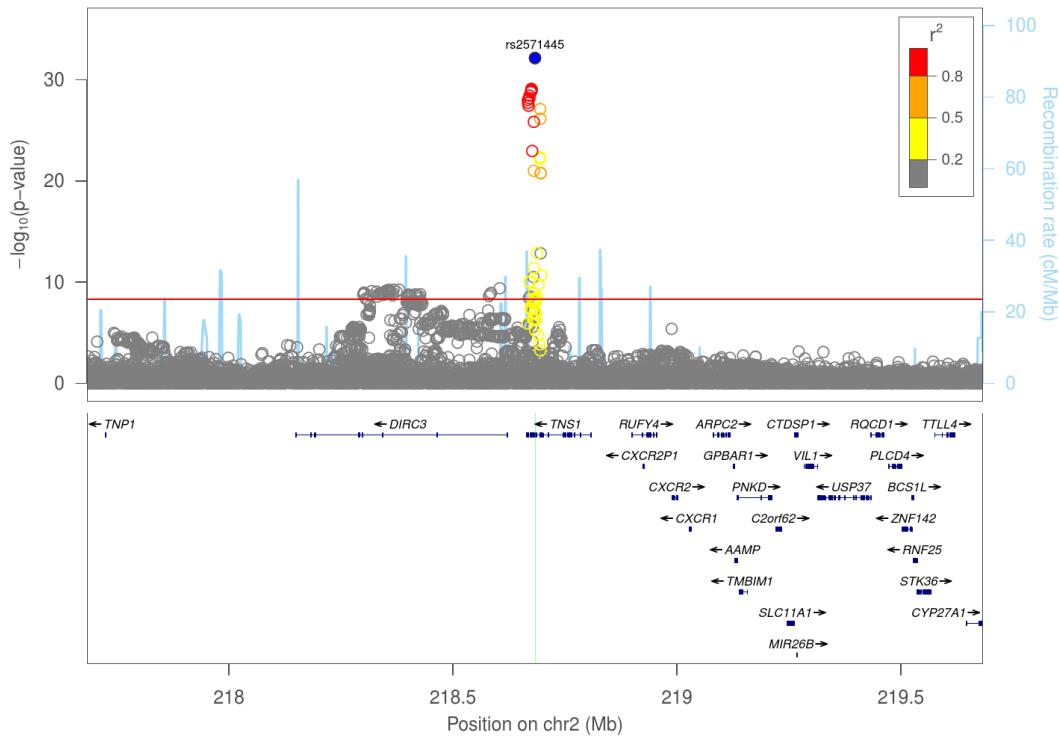

**PID1, FEV<sub>1</sub>/FVC previous signal rs10498230, new signal rs62201738**

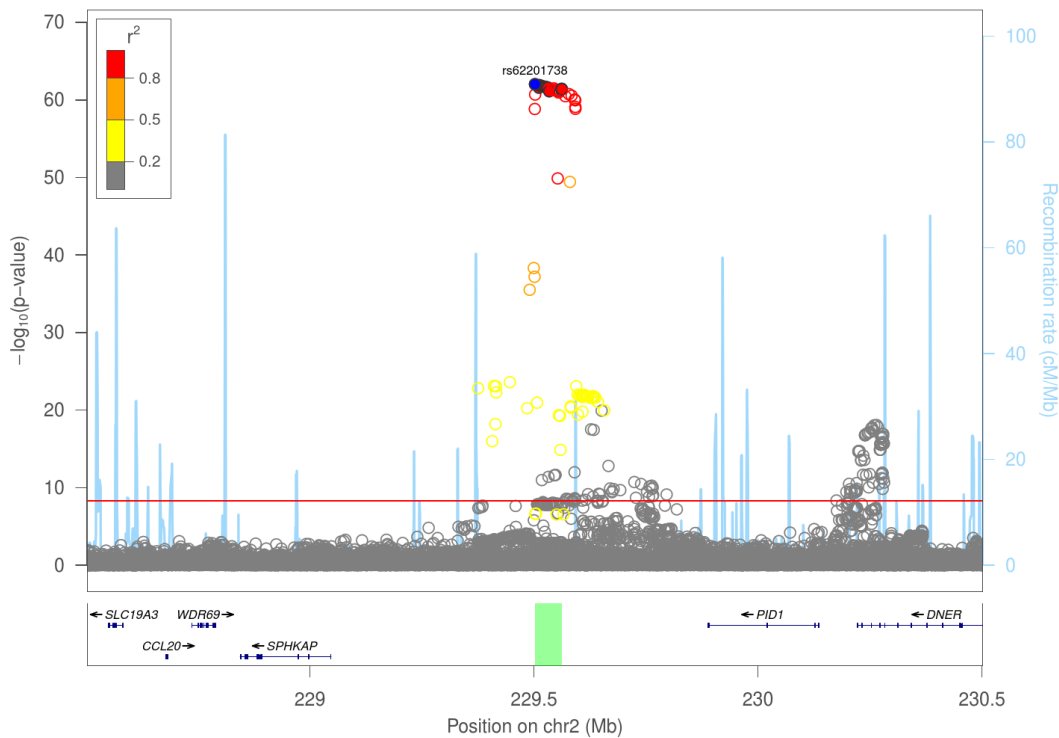

**TRAF3IP1, FEV<sub>1</sub> previous signal rs61332075, new signal rs6710301**

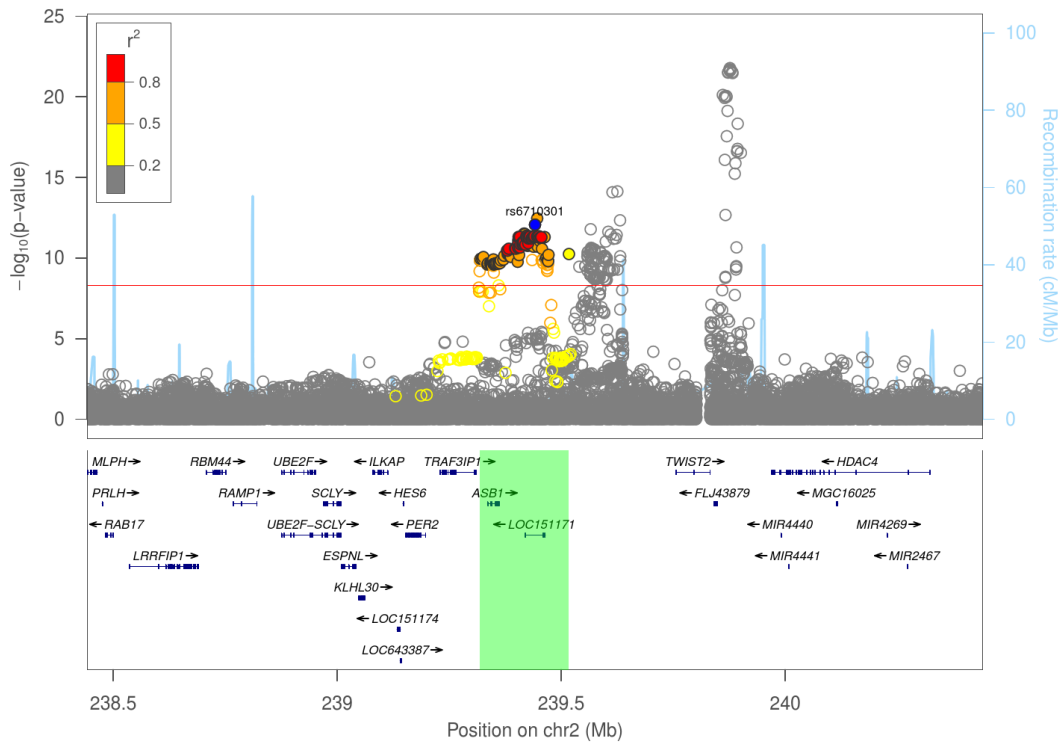

**FLJ43879, FEV<sub>1</sub>/FVC previous signal rs12477314, new signal rs4308141**

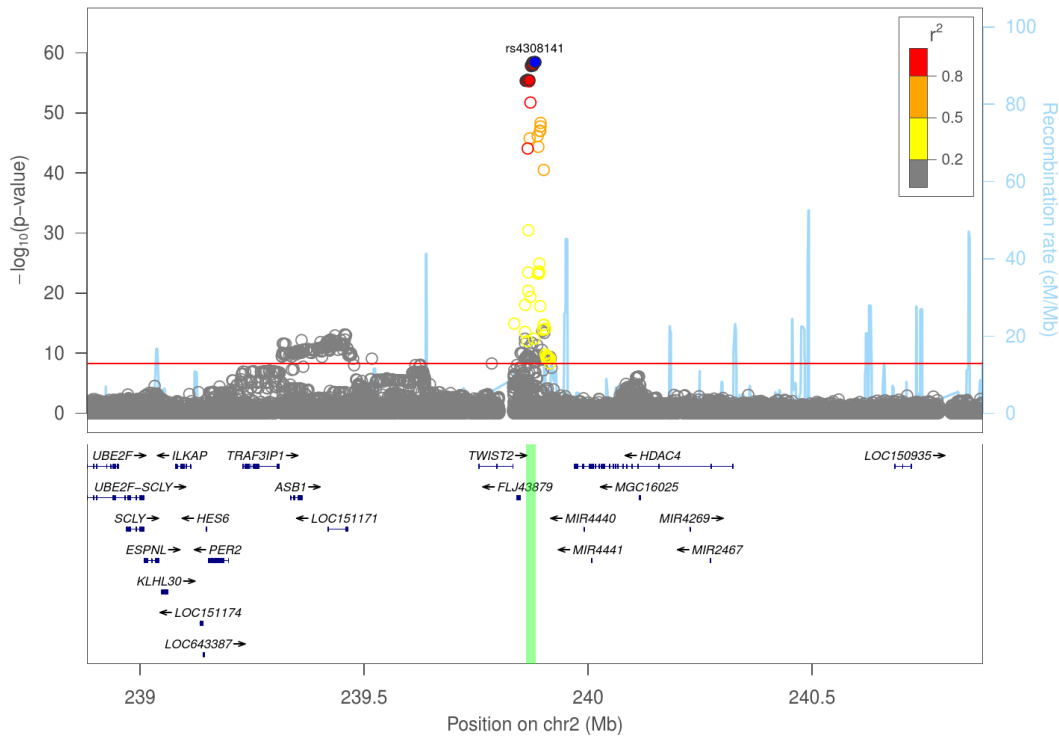

**RARB, FEV<sub>1</sub>/FVC previous signal rs1286664, new signal rs1529672**

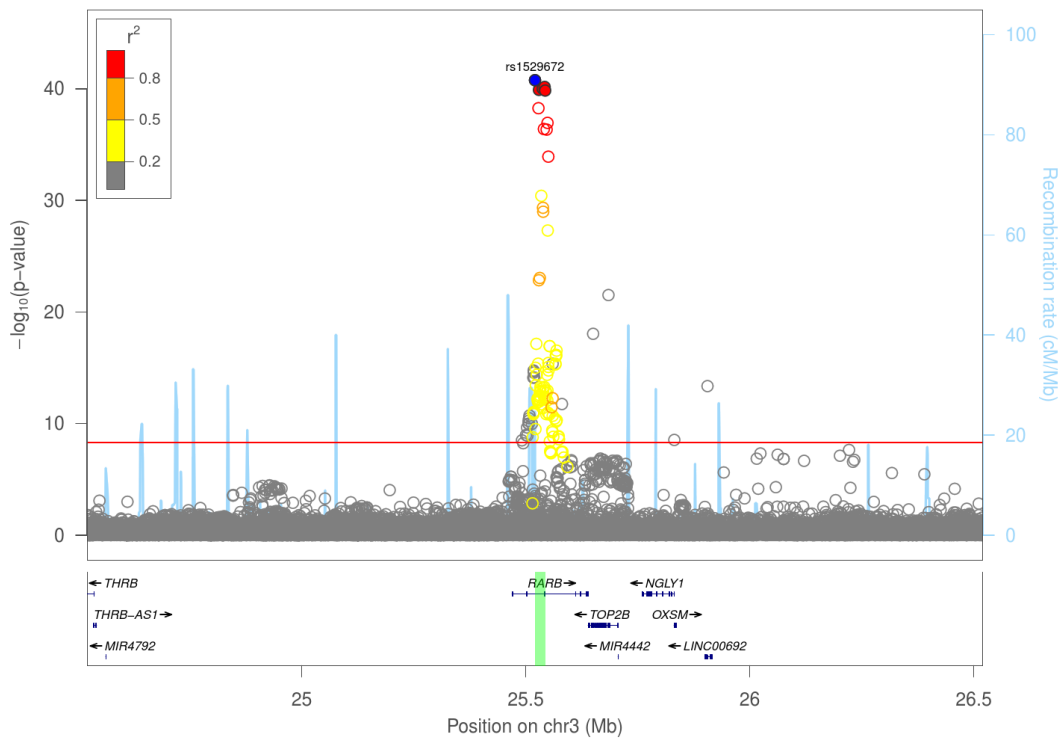

**RBMS3, FEV<sub>1</sub>/FVC previous signal rs17666332, new signal rs17666332**

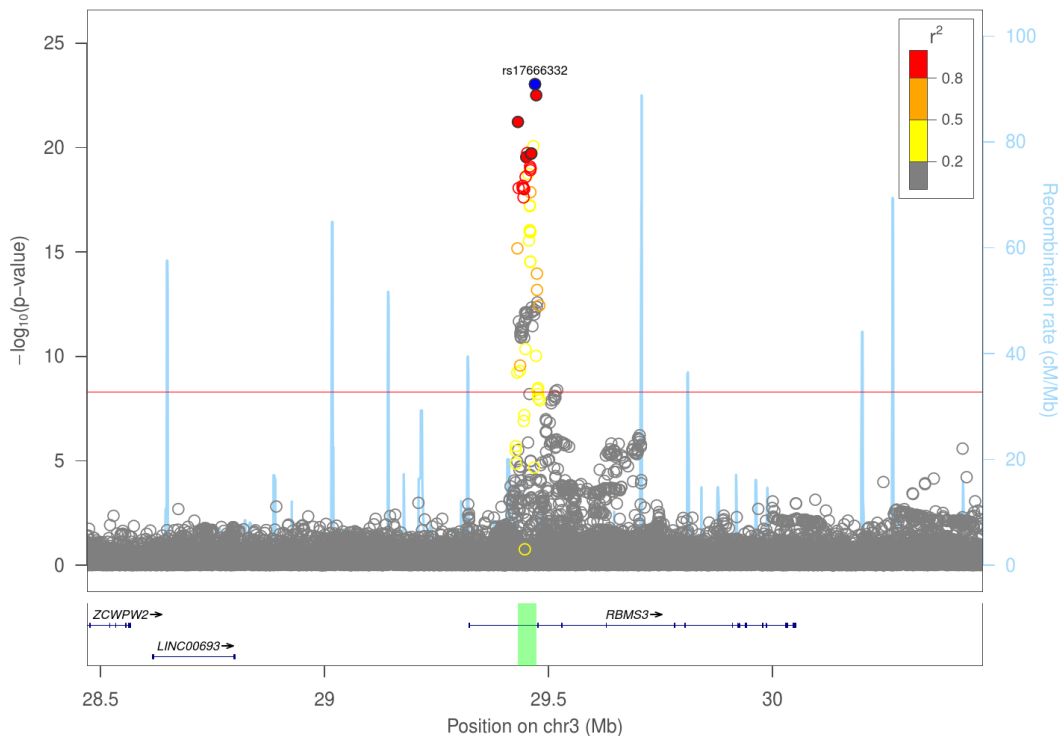

**CACNA2D3, FEV<sub>1</sub>/FVC previous signal rs1458979, new signal rs12715478**

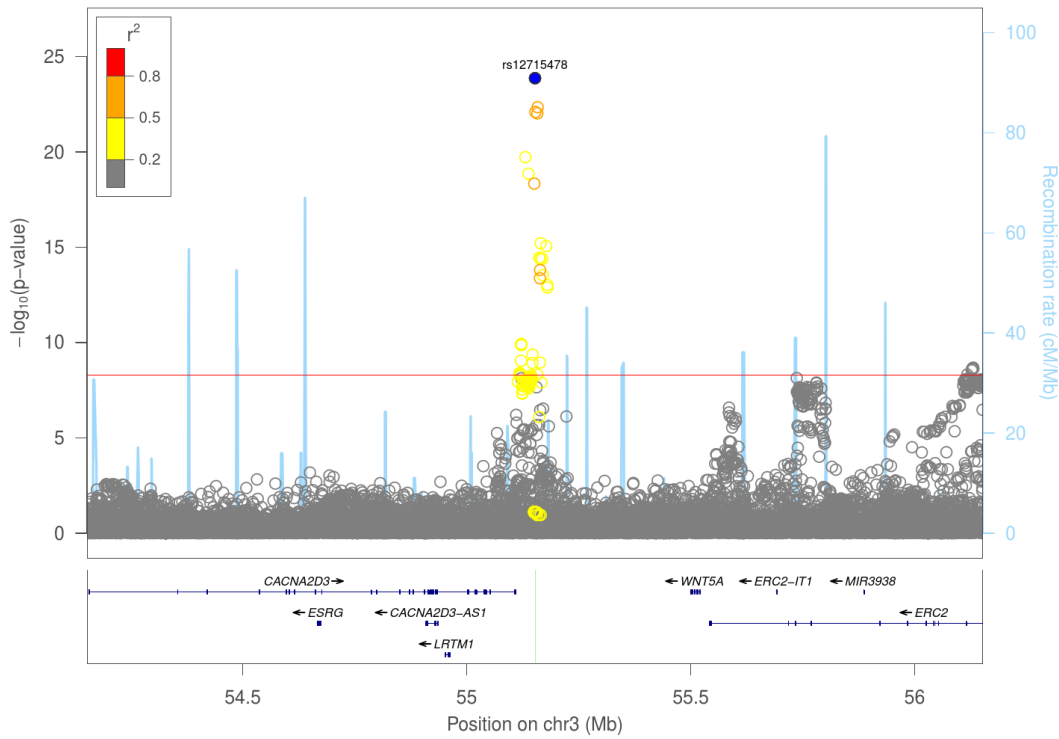

**SLMAP, FEV<sub>1</sub> previous signal rs79294353, new signal rs6445932**

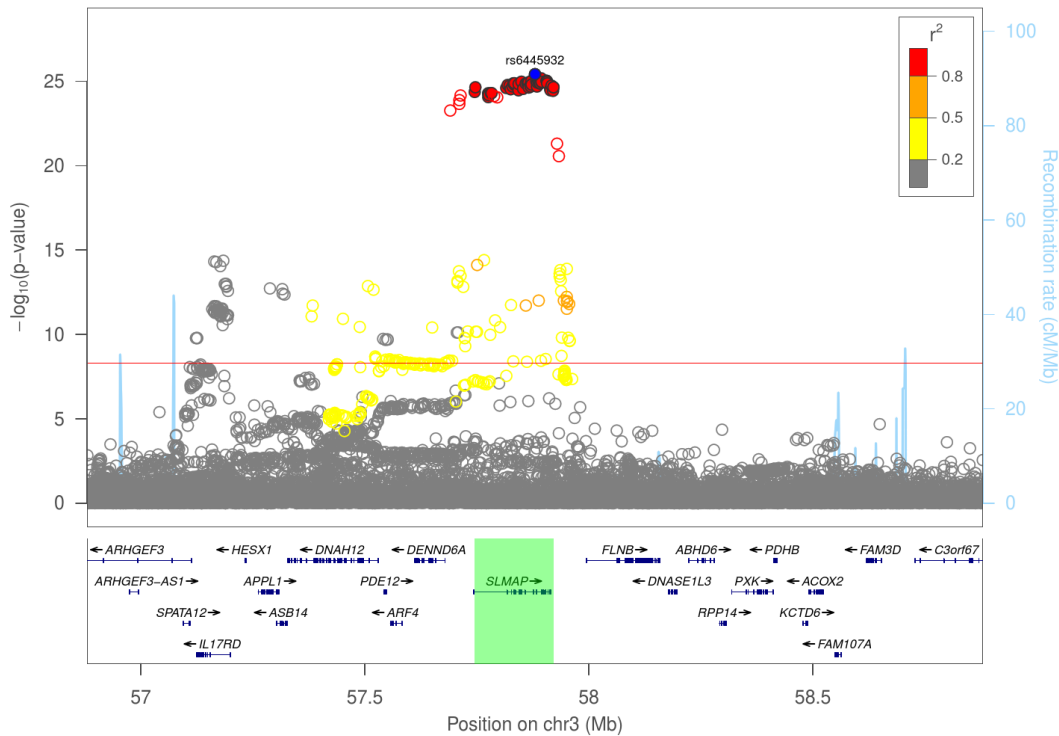

**SUCLG2, FEV<sub>1</sub> previous signal rs1490265, new signal rs4132748**

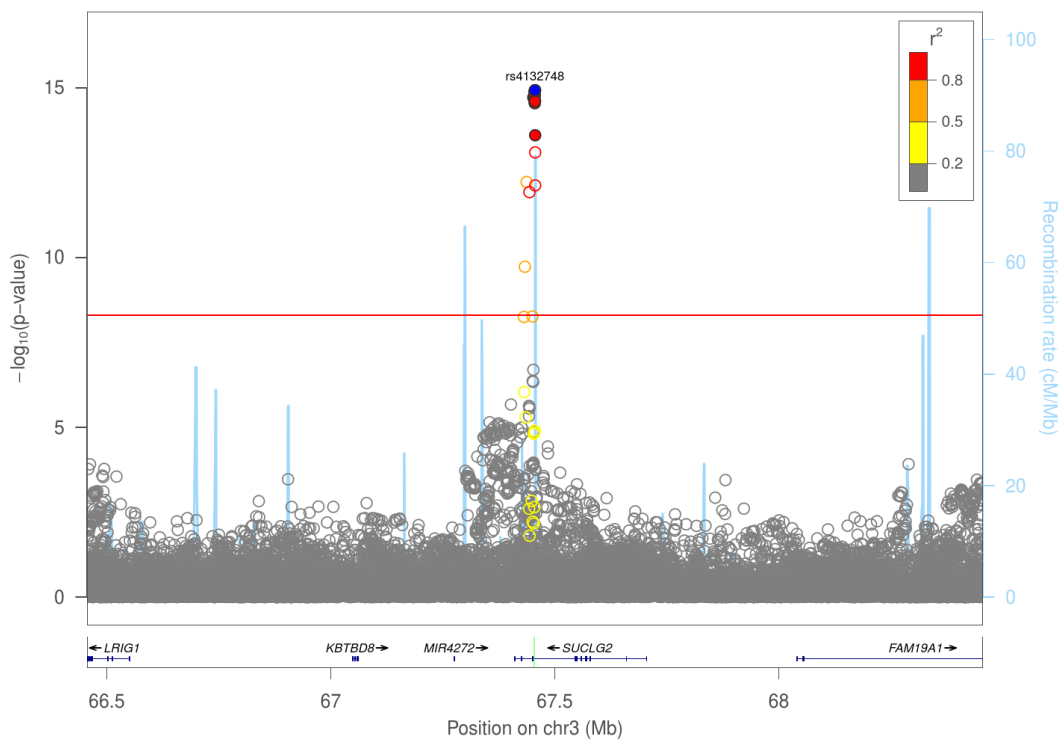

**DCBLD2, FVC previous signal rs6778584, new signal rs12497779**

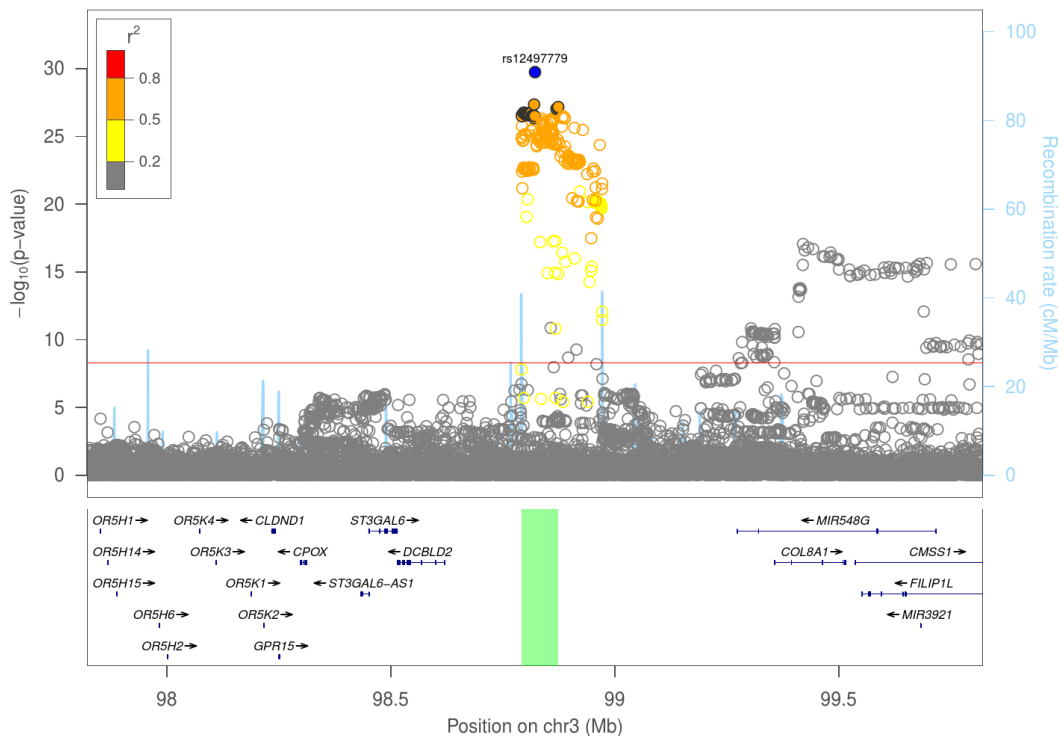

**EEFSEC, FEV<sub>1</sub>/FVC previous signal rs2811415, new signal rs2999090**

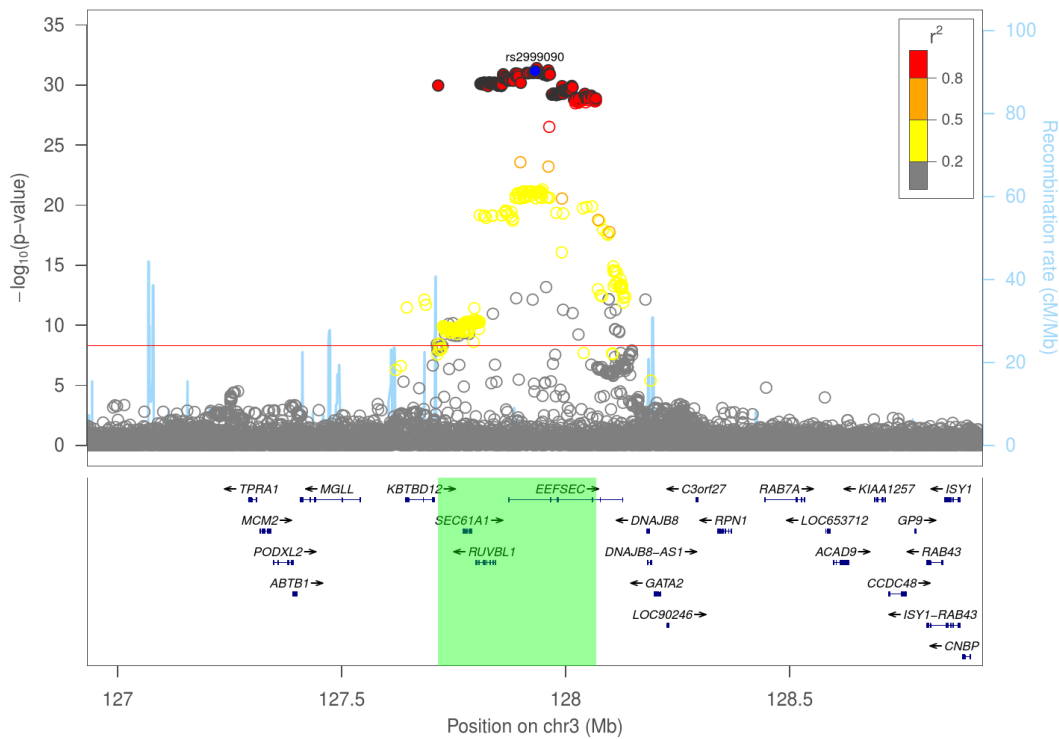

**RSRC1, FVC previous signal rs1595029, new signal rs12634907**

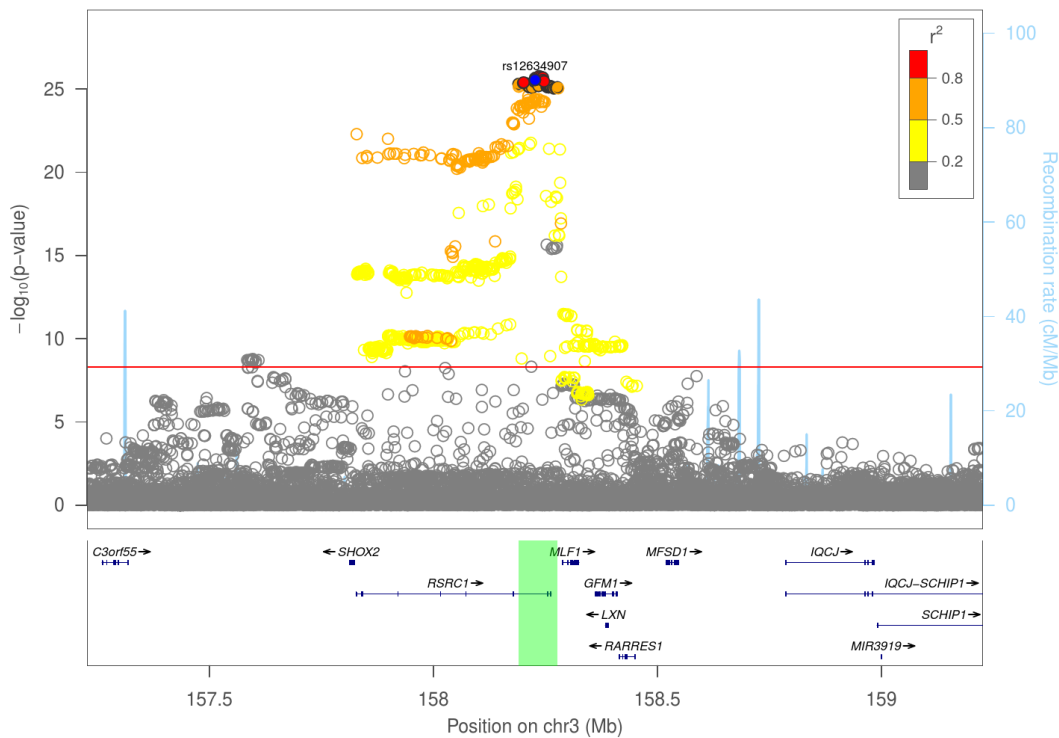

**LOC100507661, FEV<sub>1</sub> previous signal rs56341938, new signal rs879394**

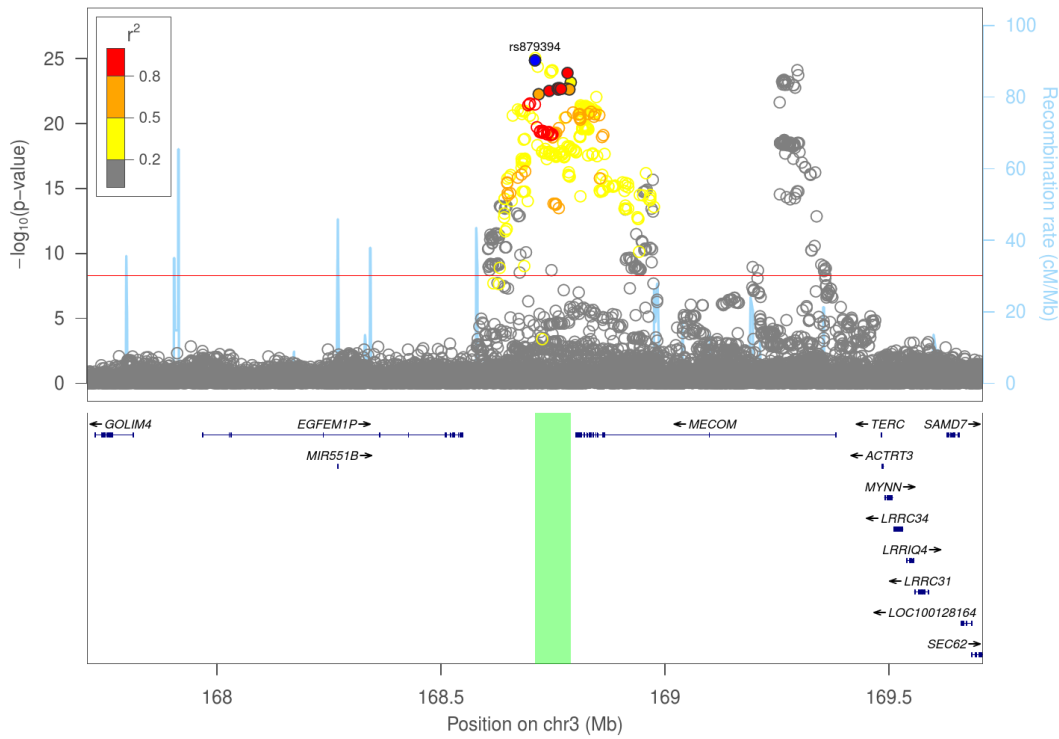

**MECOM, FEV<sub>1</sub> previous signal rs1344555, new signal rs78101726**

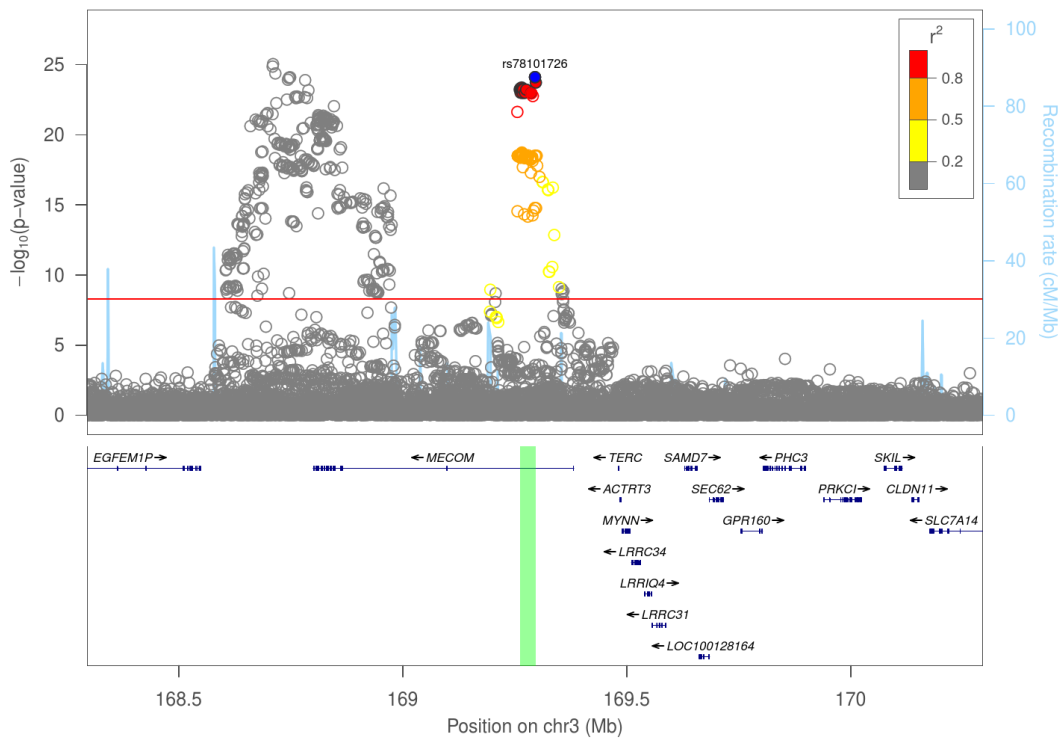



**AFAP1, FEV<sub>1</sub>/FVC previous signal rs28520091, new signal rs62289340**

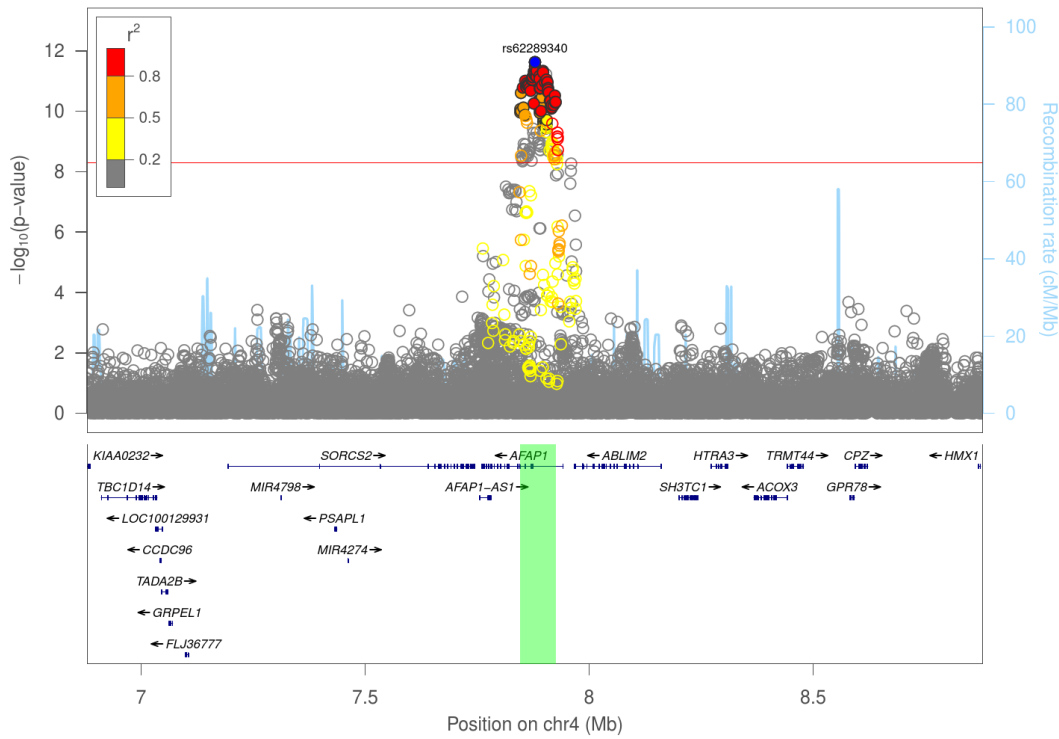

**FAM13A, FEV<sub>1</sub>/FVC previous signal rs13110699, new signal rs2609279**

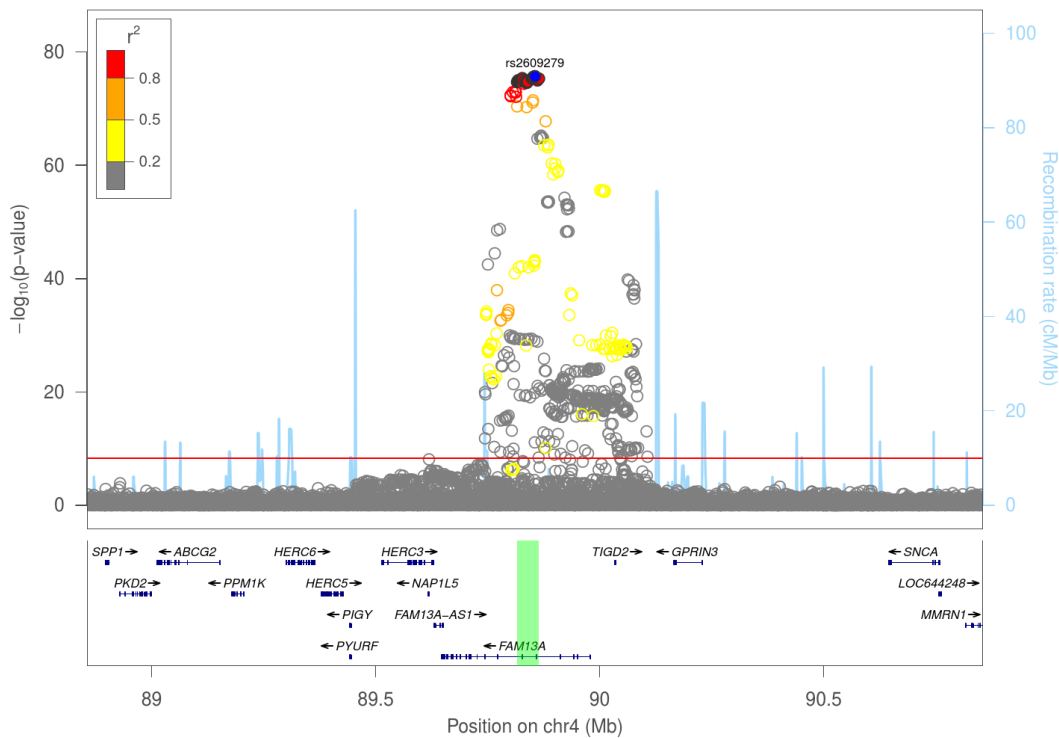

**FAM13A, FEV<sub>1</sub>/FVC previous signal rs2045517, new signal rs2869966**

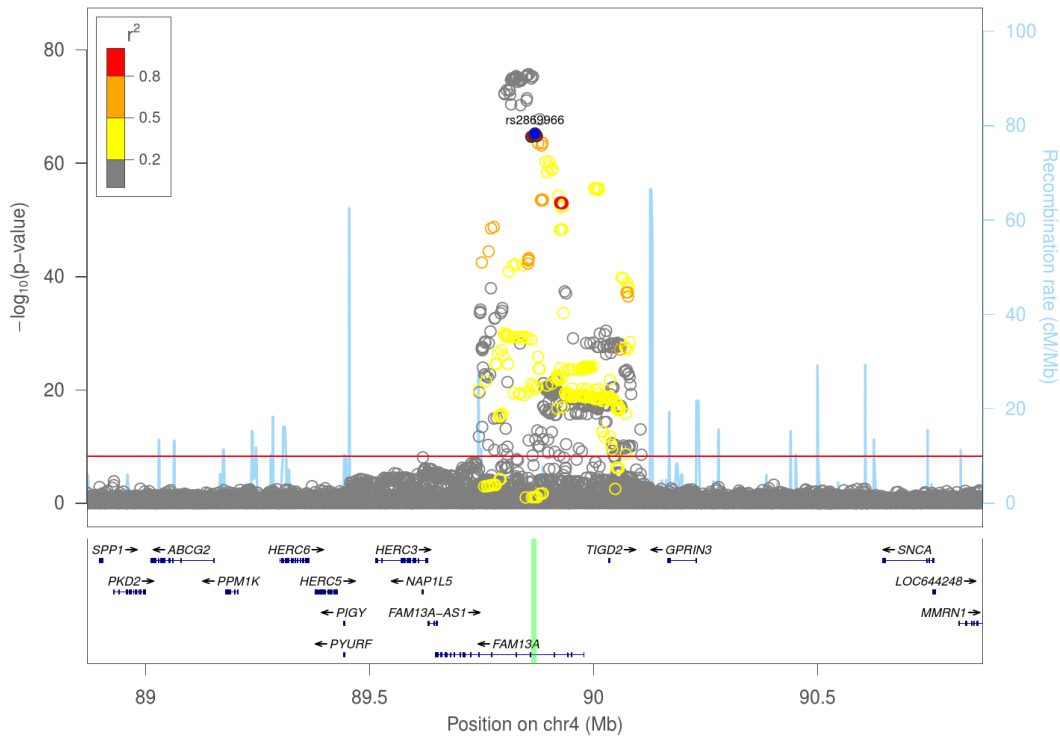

**TET2, FEV<sub>1</sub>/FVC previous signal rs2007403, new signal rs6533183**

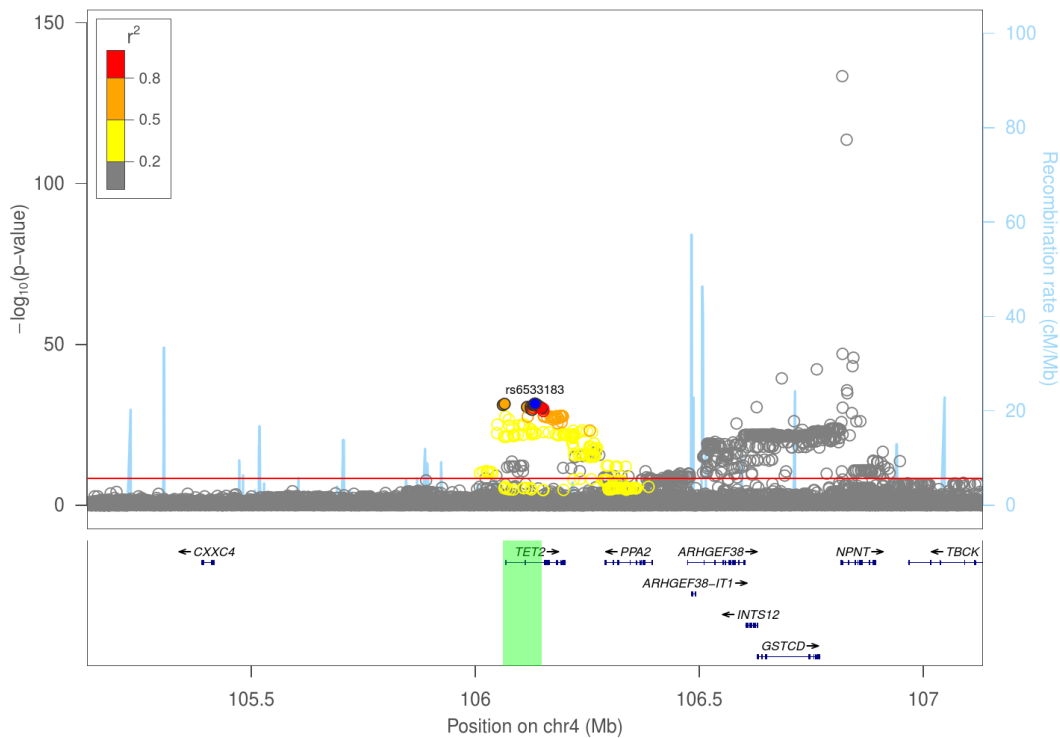

***GSTCD*, *FEV*<sub>1</sub> previous signal rs10516526, new signal rs11722225**

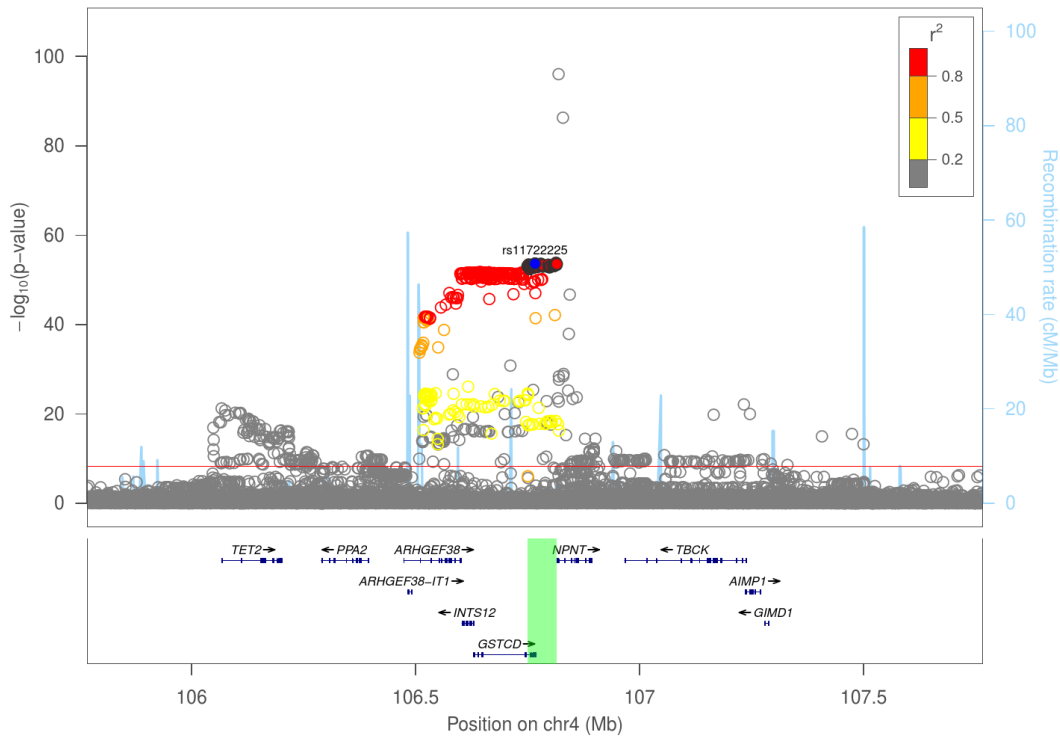

***NPNT*, *FEV*<sub>1</sub>/*FVC* previous signal rs34712979, new signal rs34712979**

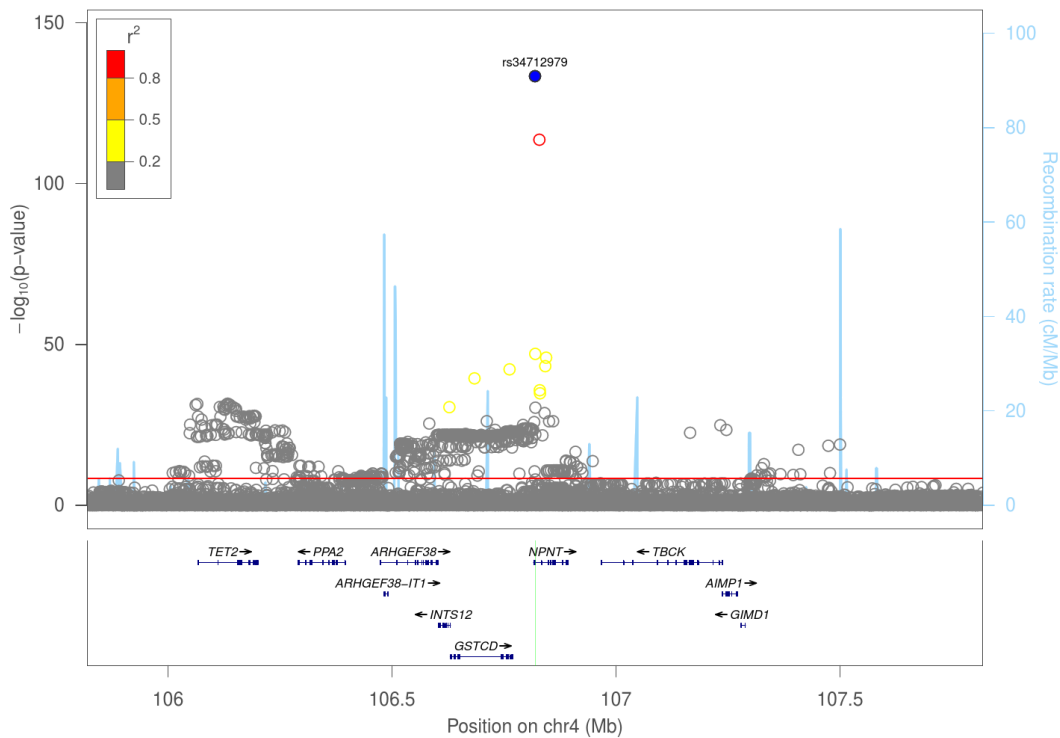

**HHIP-AS1, FEV<sub>1</sub>/FVC previous signal rs12504628, new signal rs13141641**

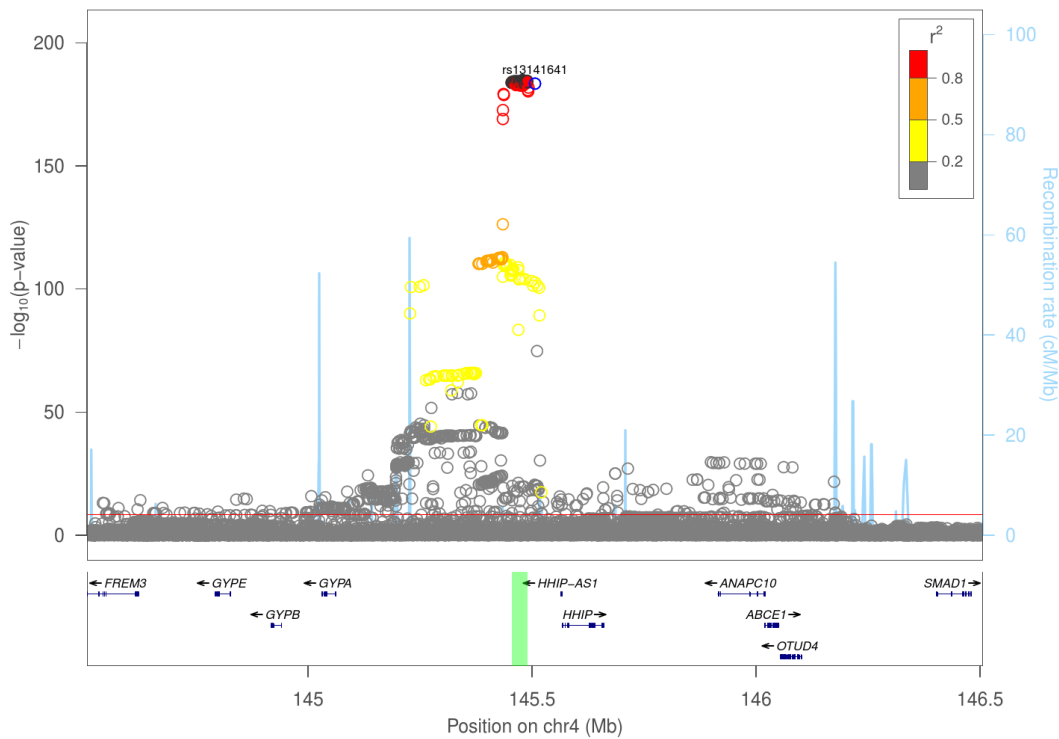

**OTUD4/SMAD1, PEF previous signal rs111898810, new signal rs2353940**

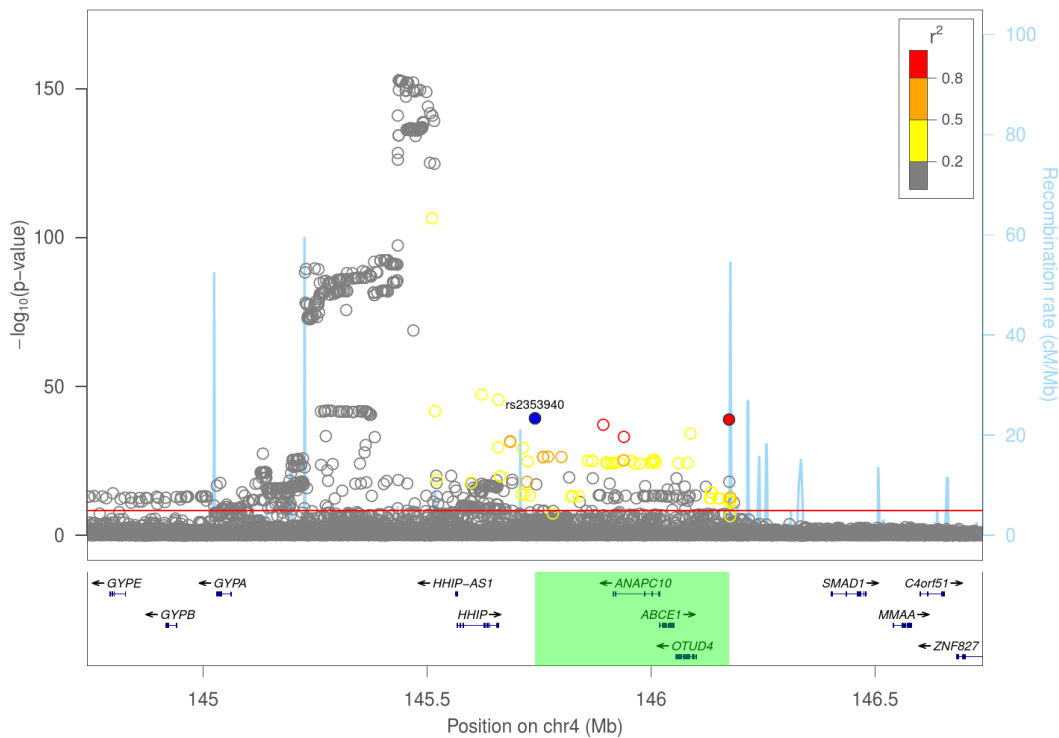

**TARS, FVC previous signal rs91731, new signal rs268717**

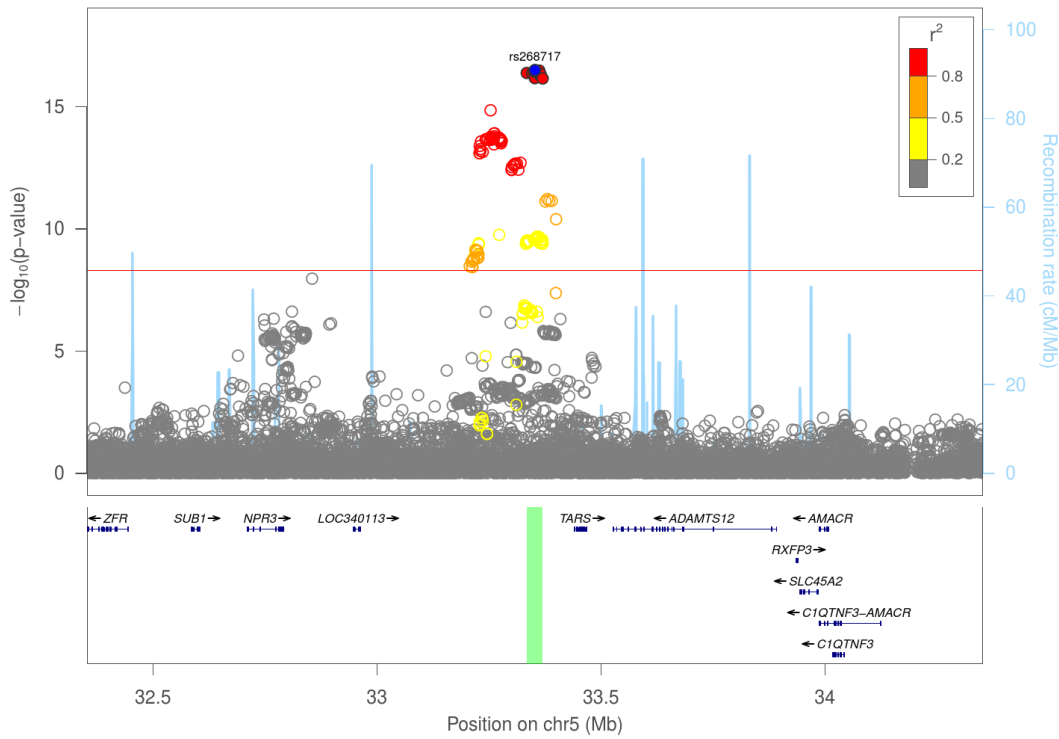

**FGF10, FVC previous signal rs1448044, new signal rs6859730**

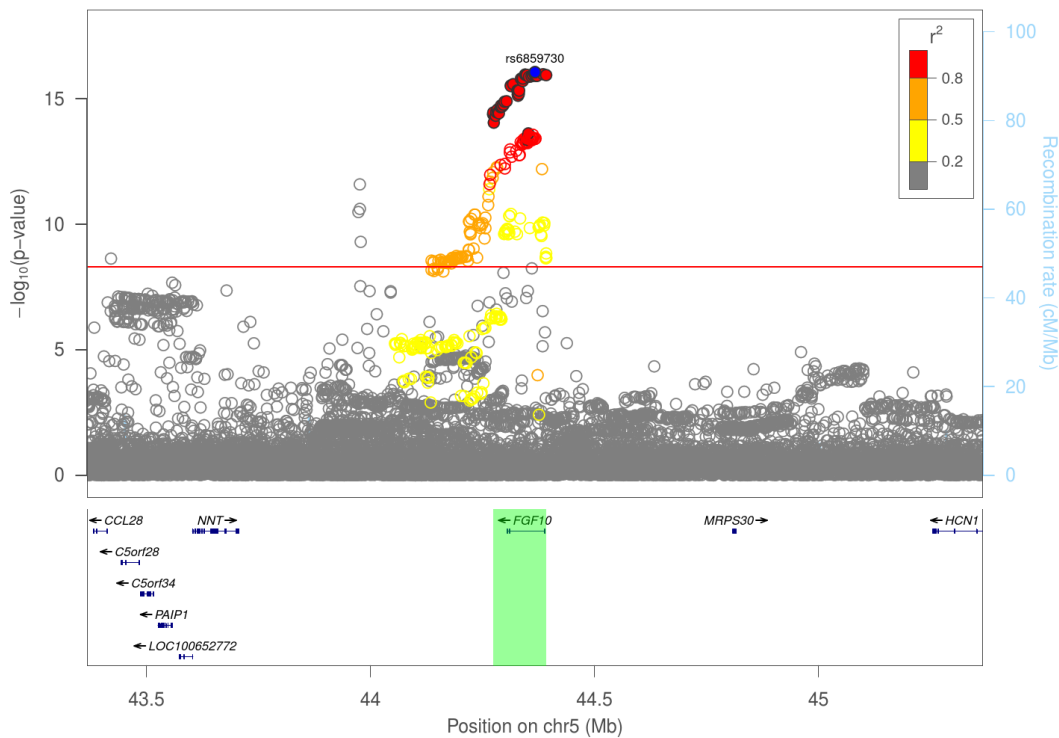

**ITGA1, FEV<sub>1</sub>/FVC previous signal rs1551943, new signal rs12522114**

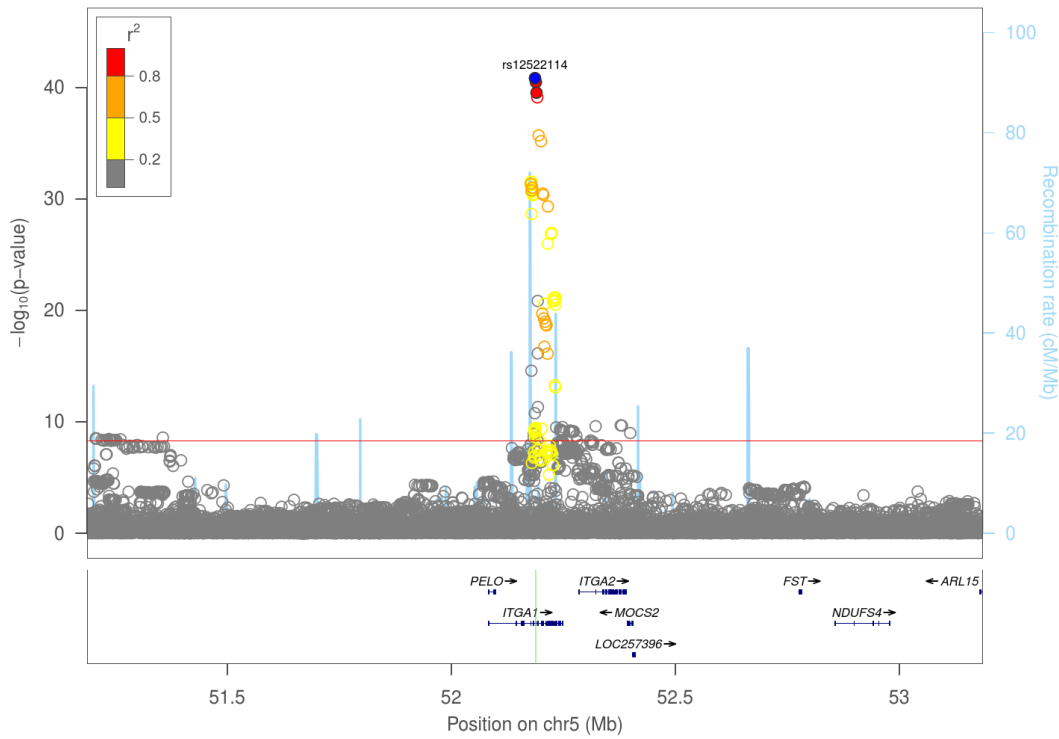

**ARL15, FVC previous signal rs2441026, new signal rs2441026**

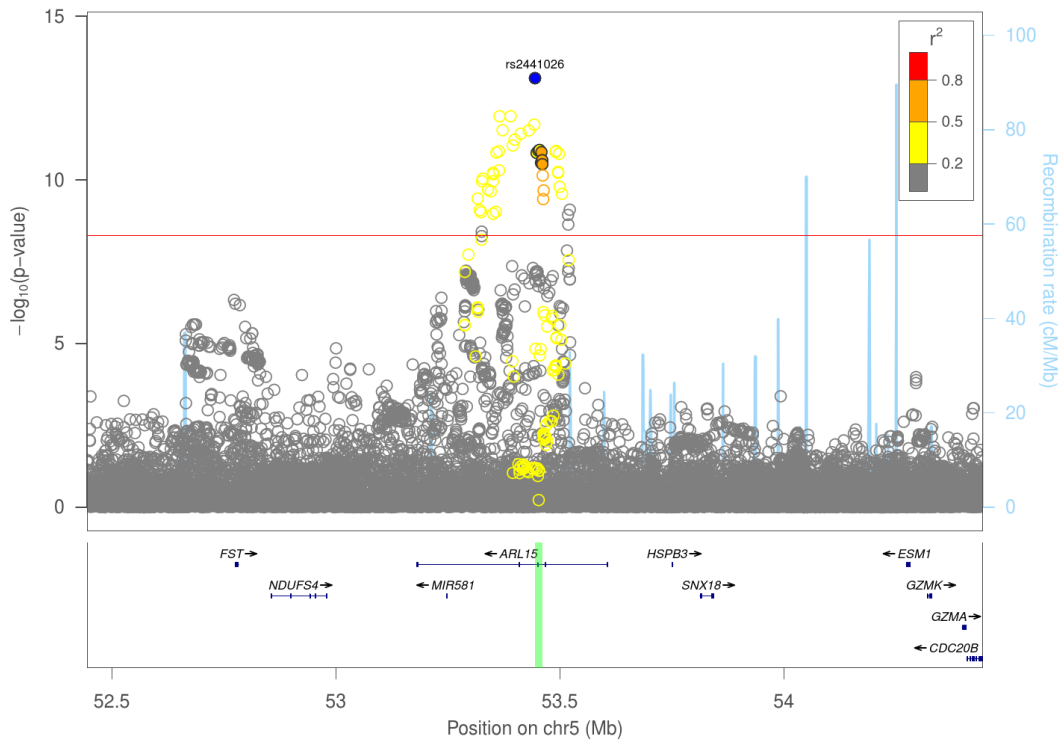

**AP3B1, FVC previous signal rs72776440, new signal rs425102**

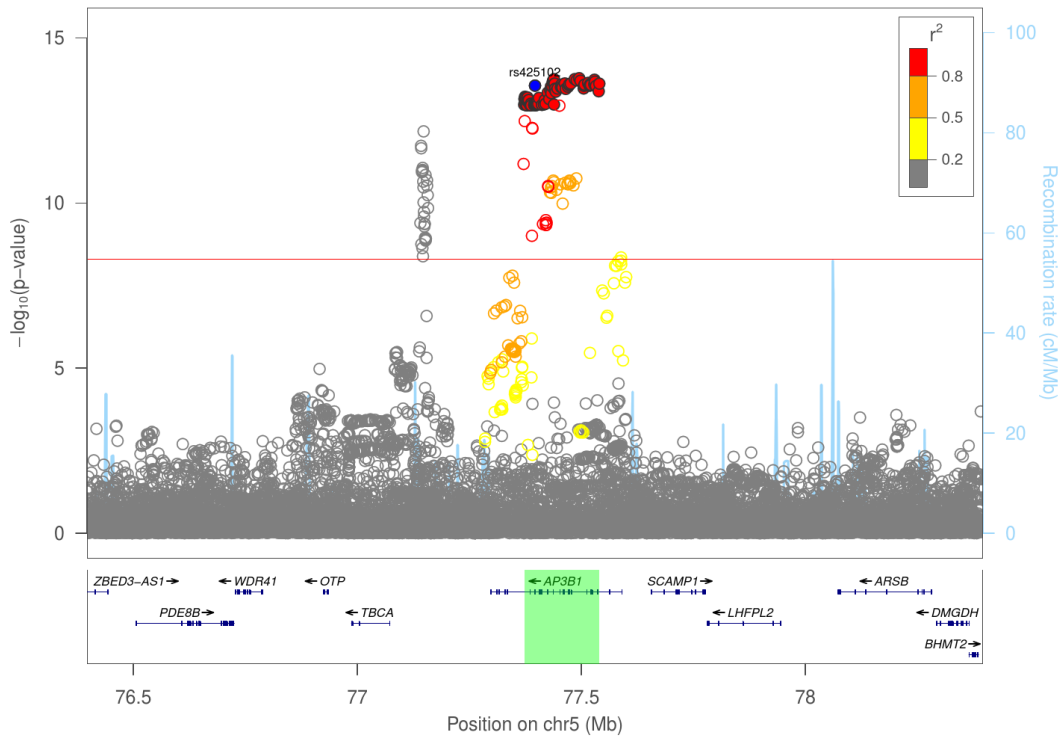

**SPATA9, FEV<sub>1</sub>/FVC previous signal rs153916, new signal rs987068**

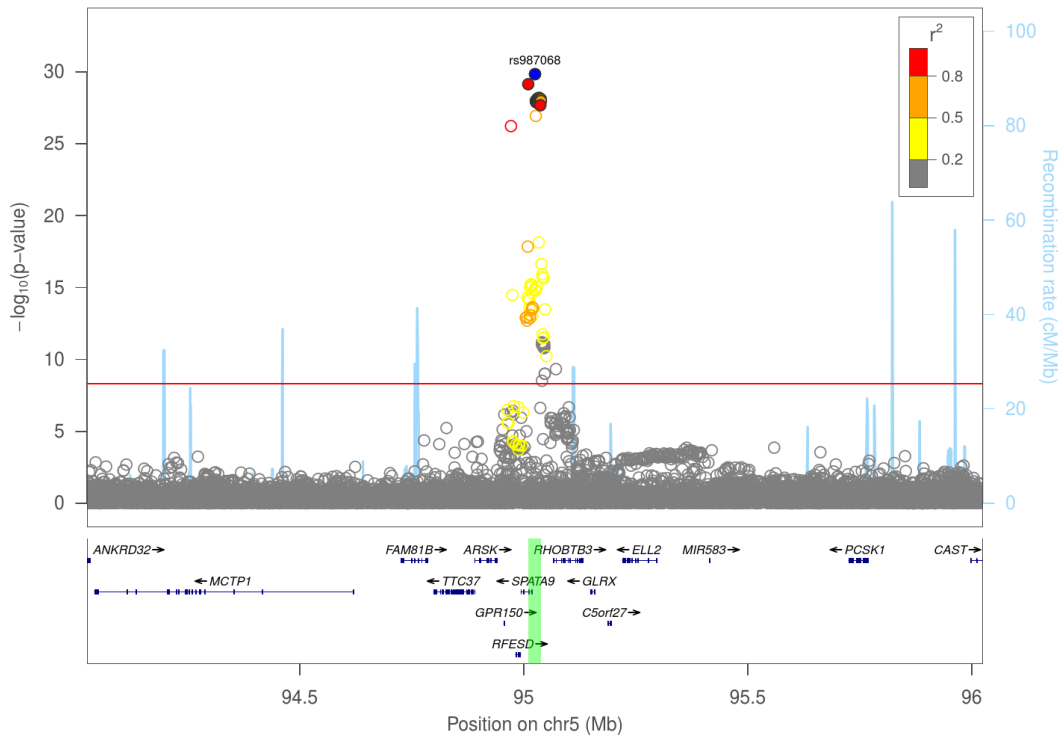

**P4HA2-AS1, FVC previous signal rs7713065, new signal rs3843503**

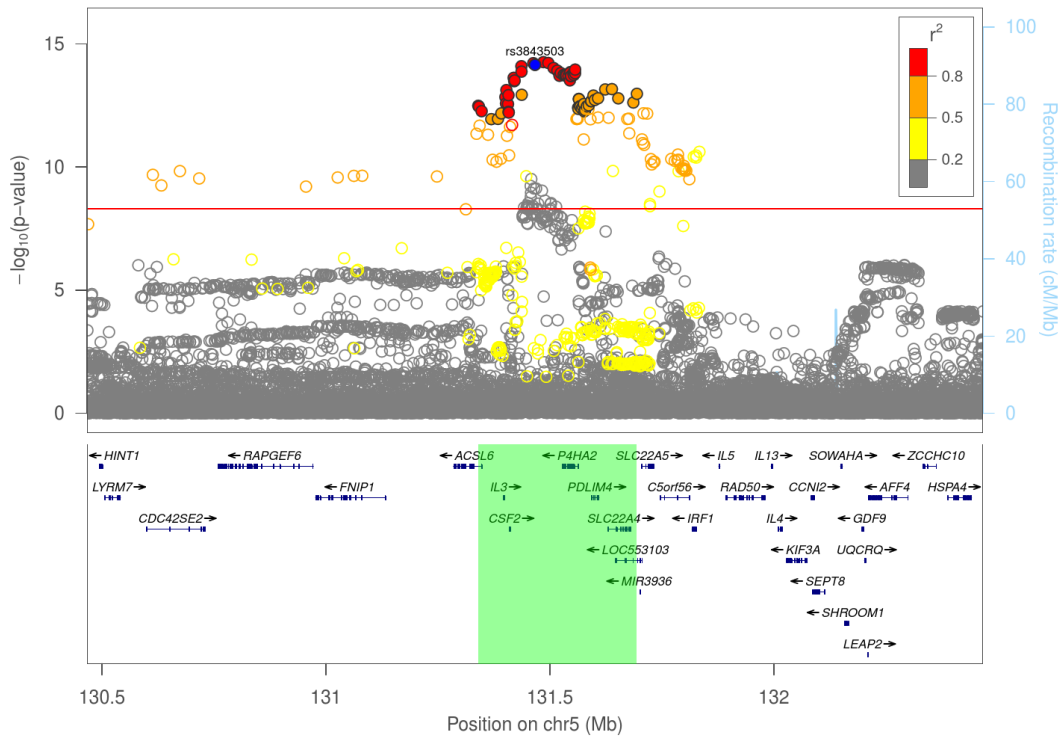

**HTR4, FEV<sub>1</sub>/FVC previous signal rs7715901, new signal rs7733410**

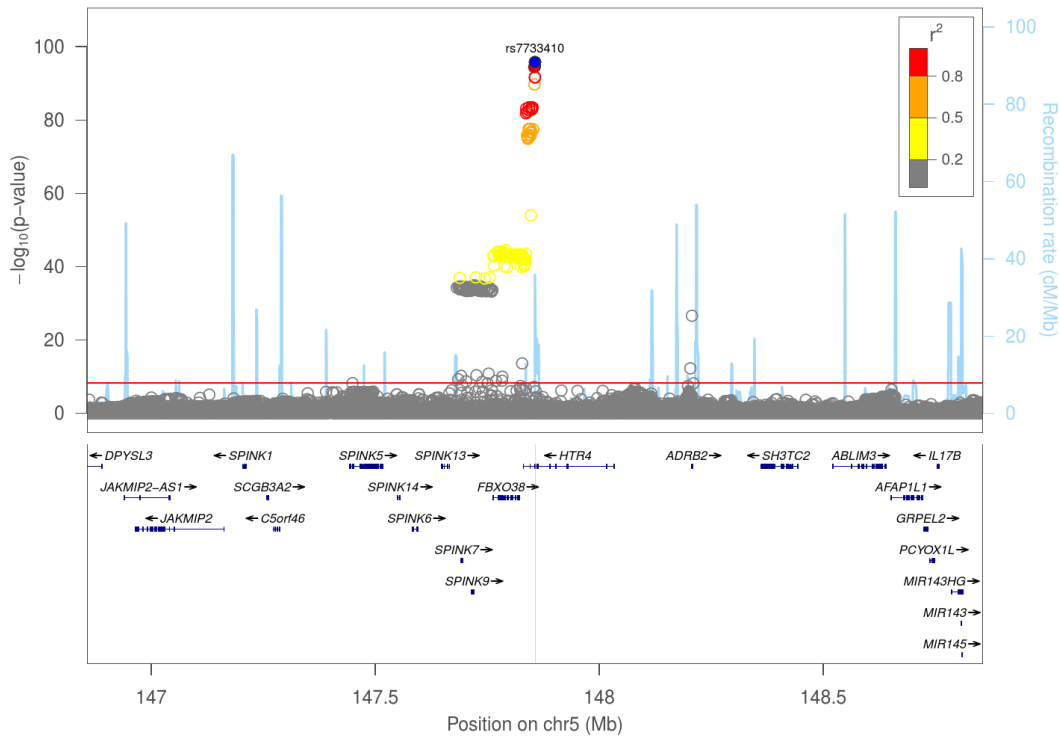



**ABLIM3, FEV<sub>1</sub> previous signal rs2014787, new signal rs11952673**

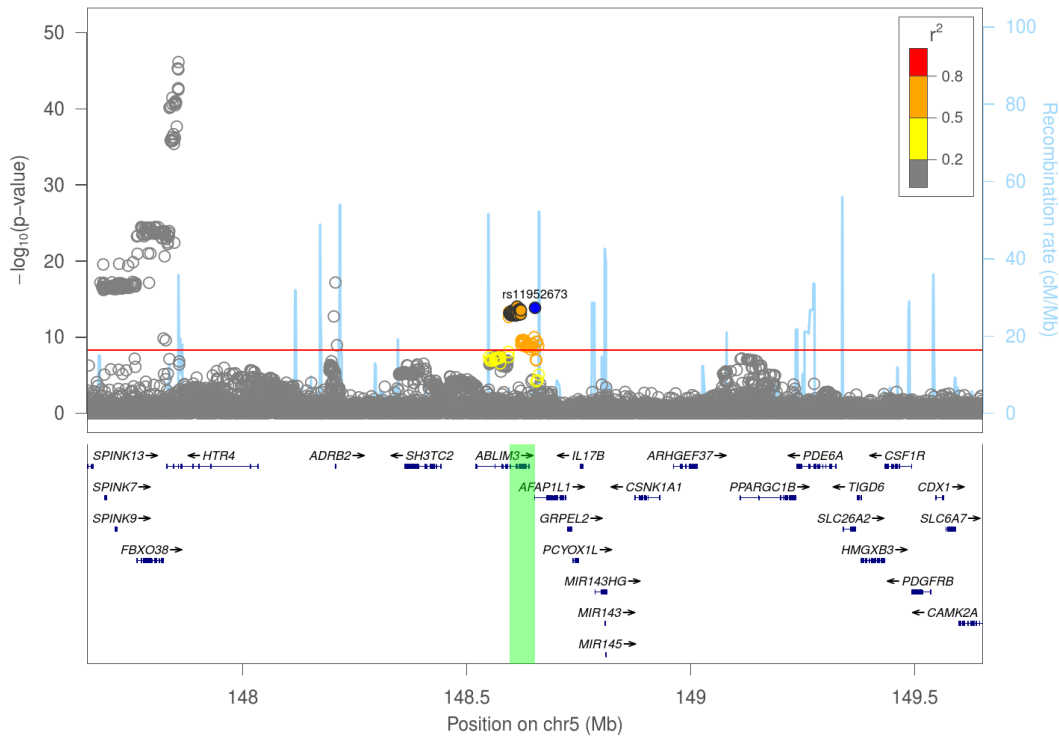

**CYFIP2, FEV<sub>1</sub>/FVC previous signal rs10515750, new signal rs11134766**

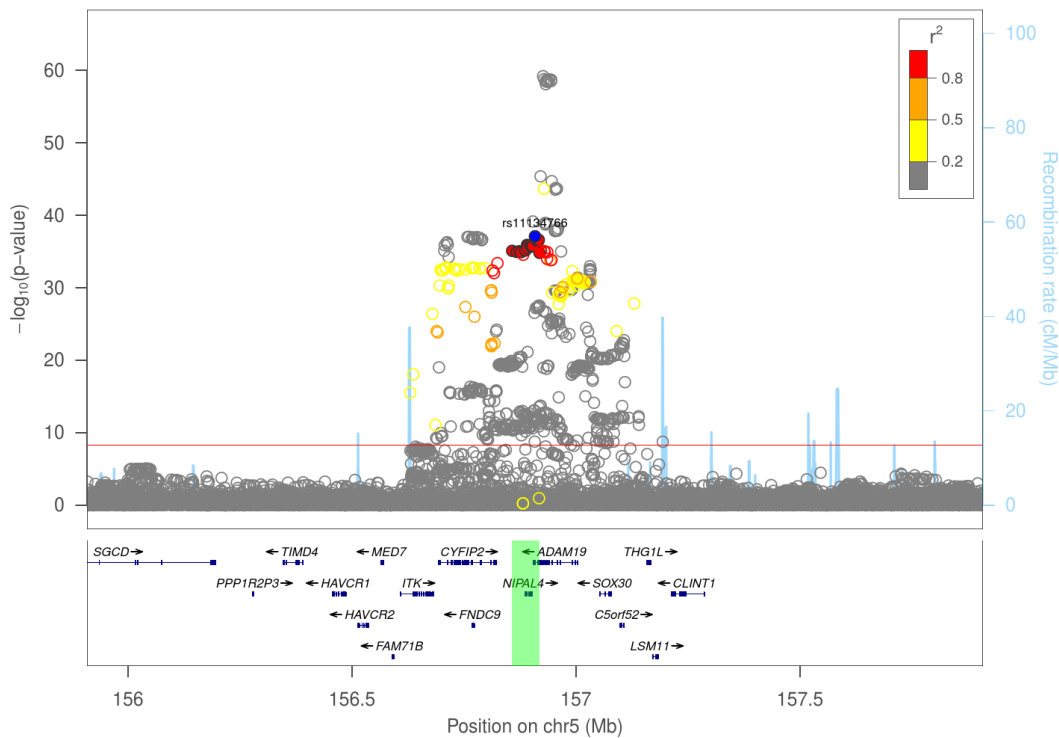

**ADAM19, FEV<sub>1</sub>/FVC previous signal rs1990950, new signal rs11134789**

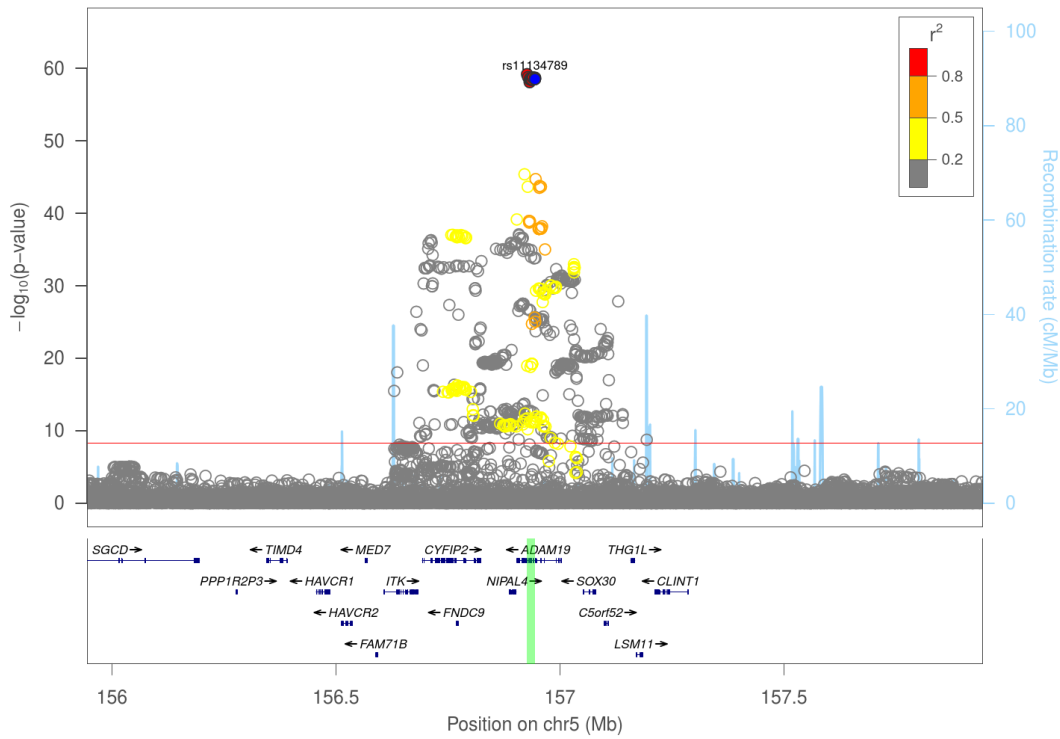

**LY86, FEV<sub>1</sub>/FVC previous signal rs1294421, new signal rs1294417**

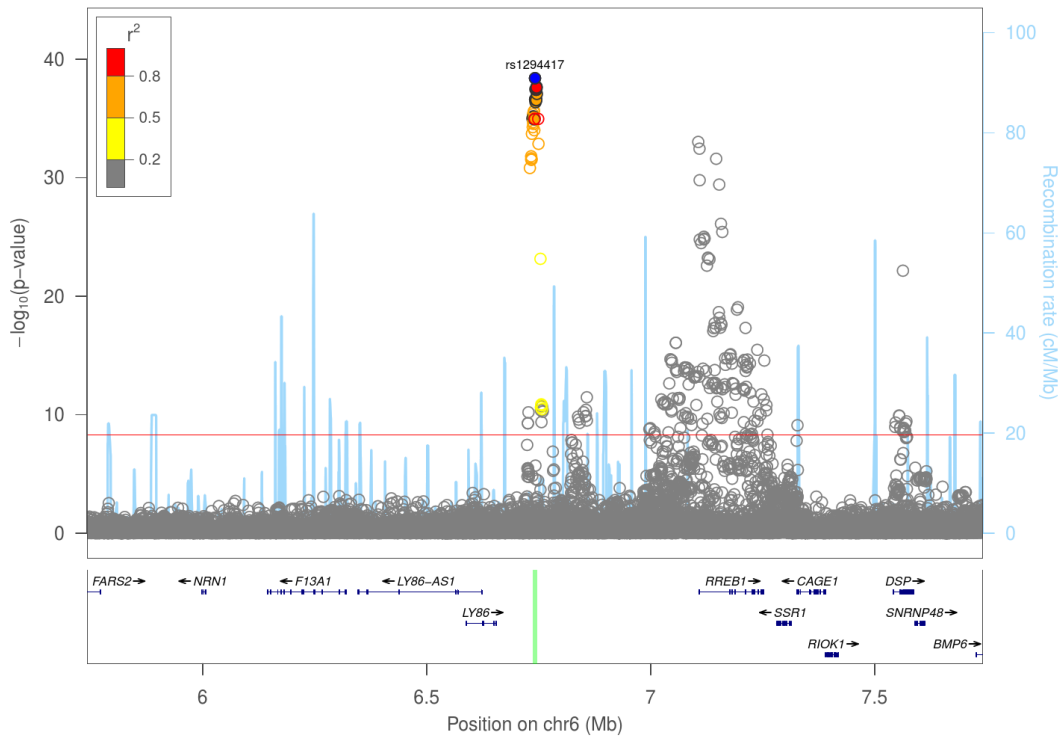

**DSP, FEV<sub>1</sub>/FVC previous signal rs55938083, new signal rs2076295**

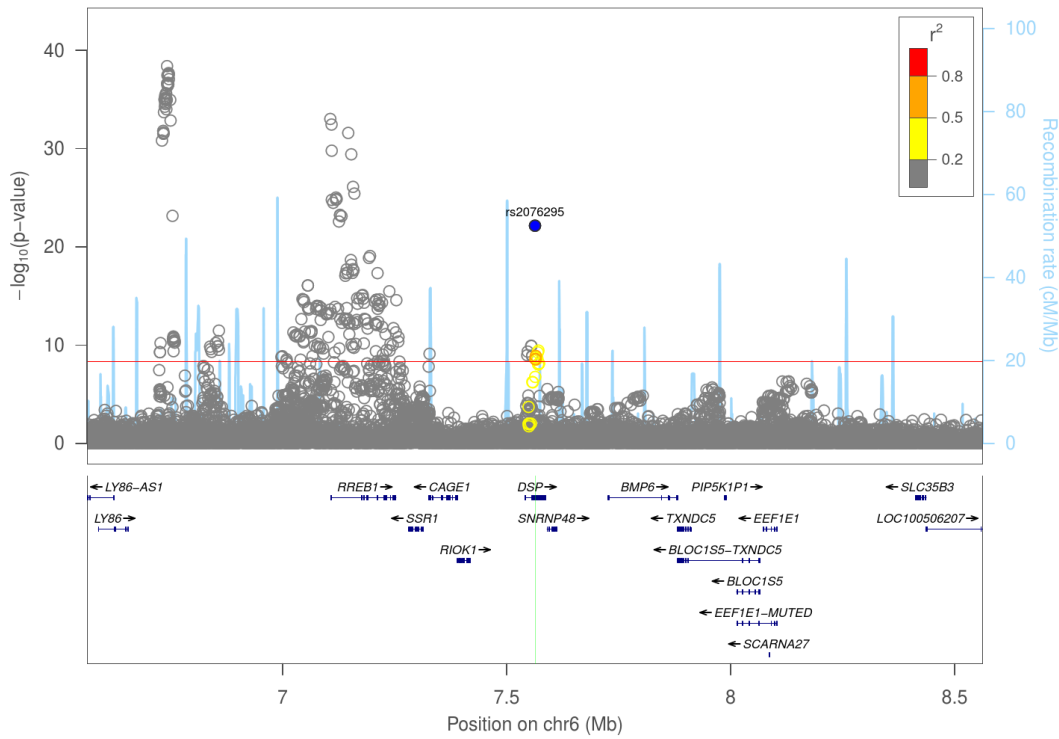

**BMP6, FVC previous signal rs6924424, new signal rs10498672**

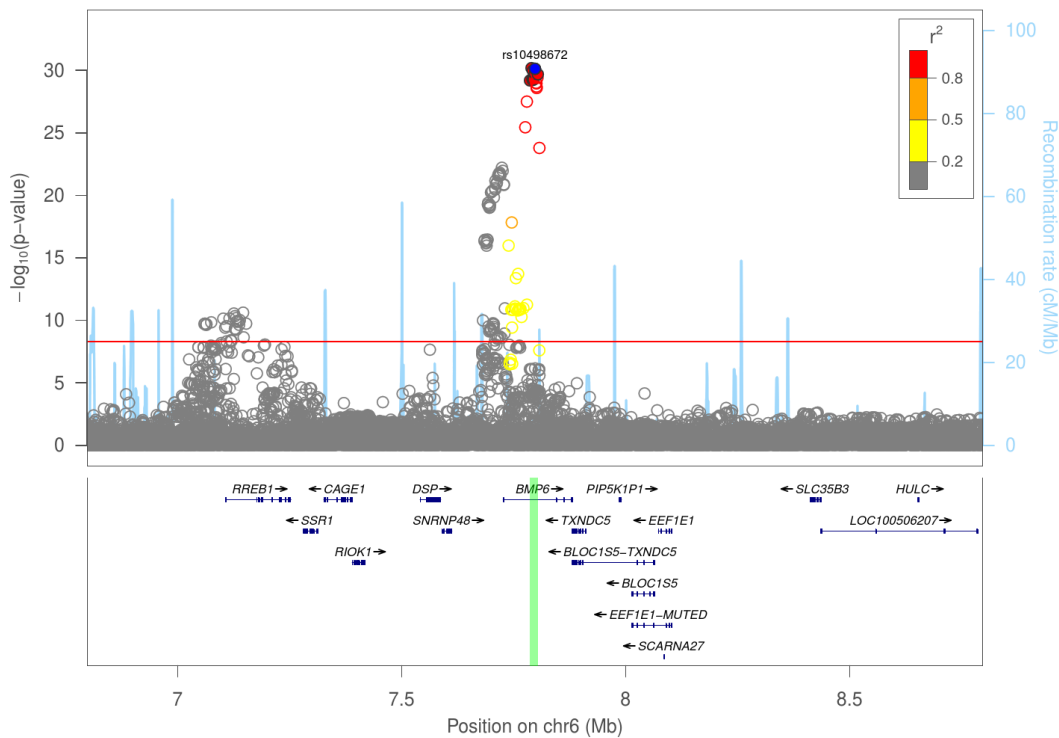

**CASC15, FEV<sub>1</sub>/FVC previous signal rs1928168, new signal rs13198081**

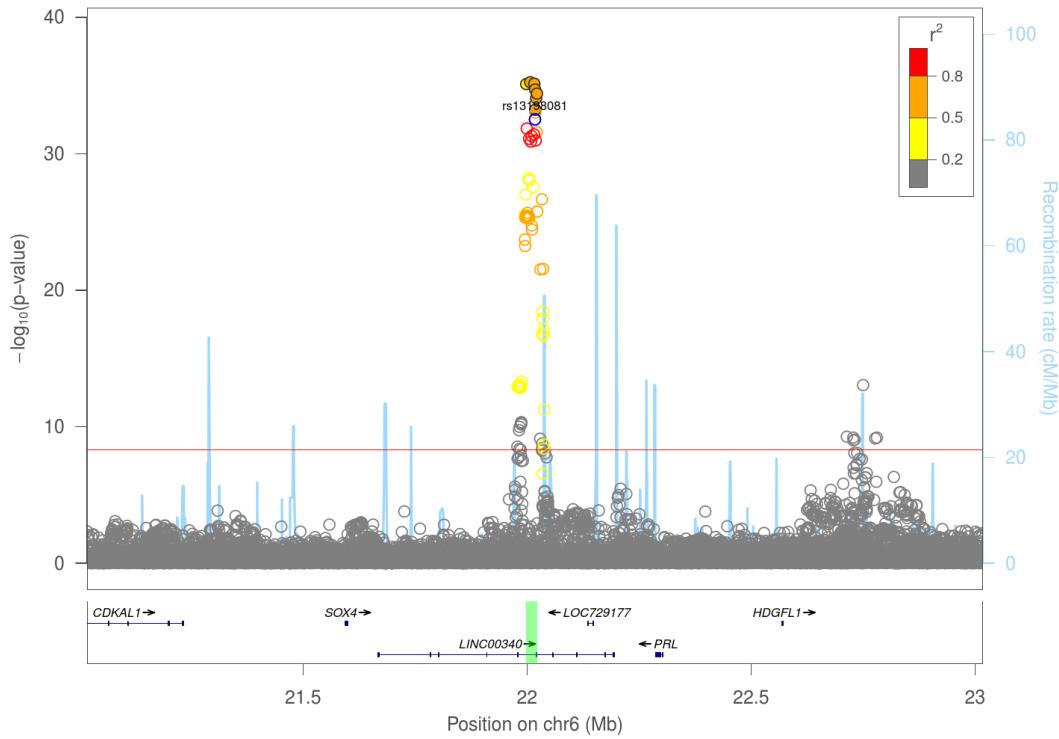

**ZNF184, PEF previous signal rs34864796, new signal rs7752448**

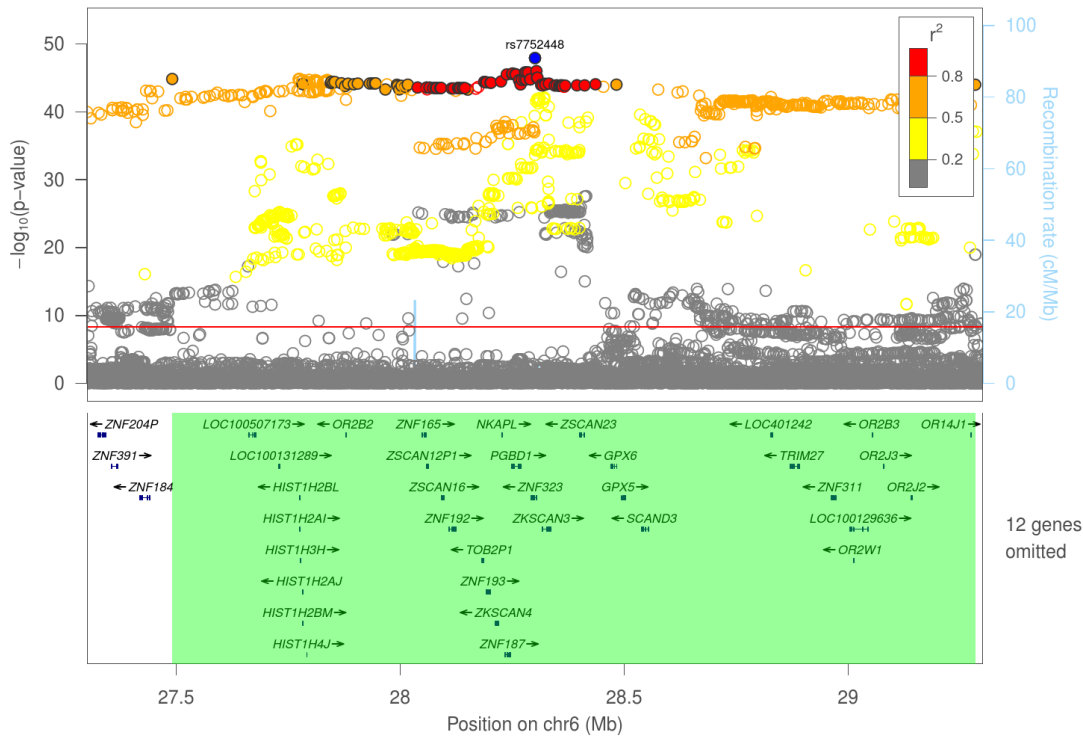

**AGER, FEV<sub>1</sub>/FVC previous signal rs2070600, new signal rs2070600**

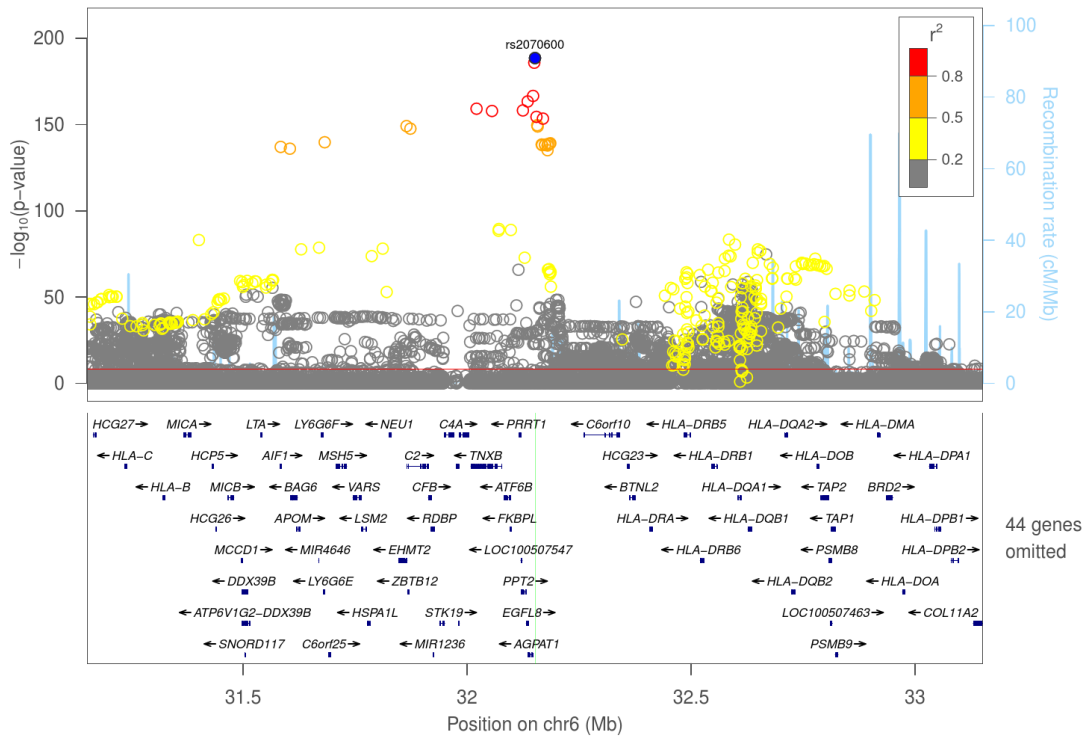

**HLA-DQB1, FEV<sub>1</sub>/FVC previous signal rs3844313, new signal rs9274247**

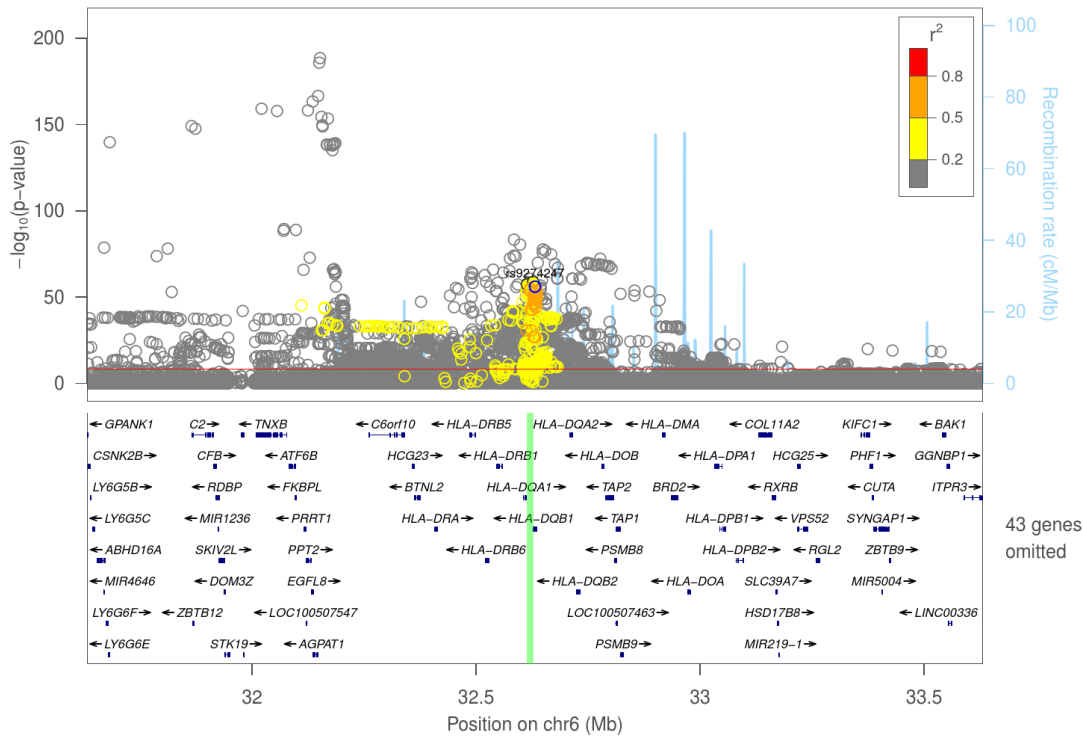

**KCNQ5, FEV<sub>1</sub>/FVC previous signal rs16883089, new signal rs13206405**

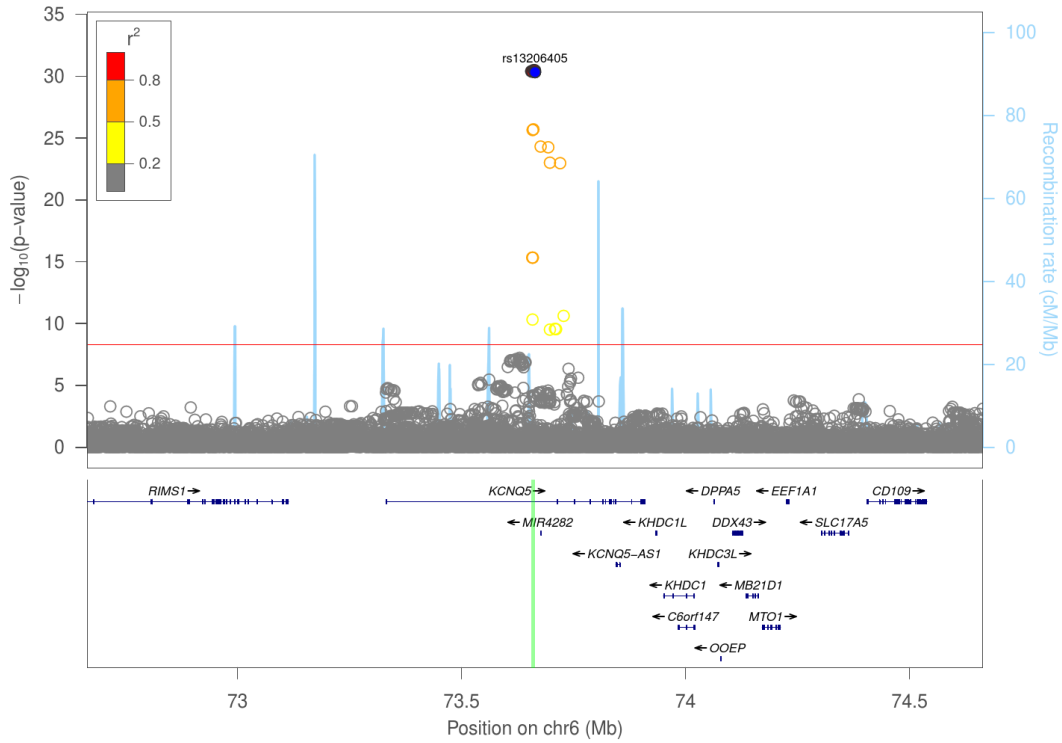

**ARMC2, FEV<sub>1</sub>/FVC previous signal rs2768551, new signal rs2798641**

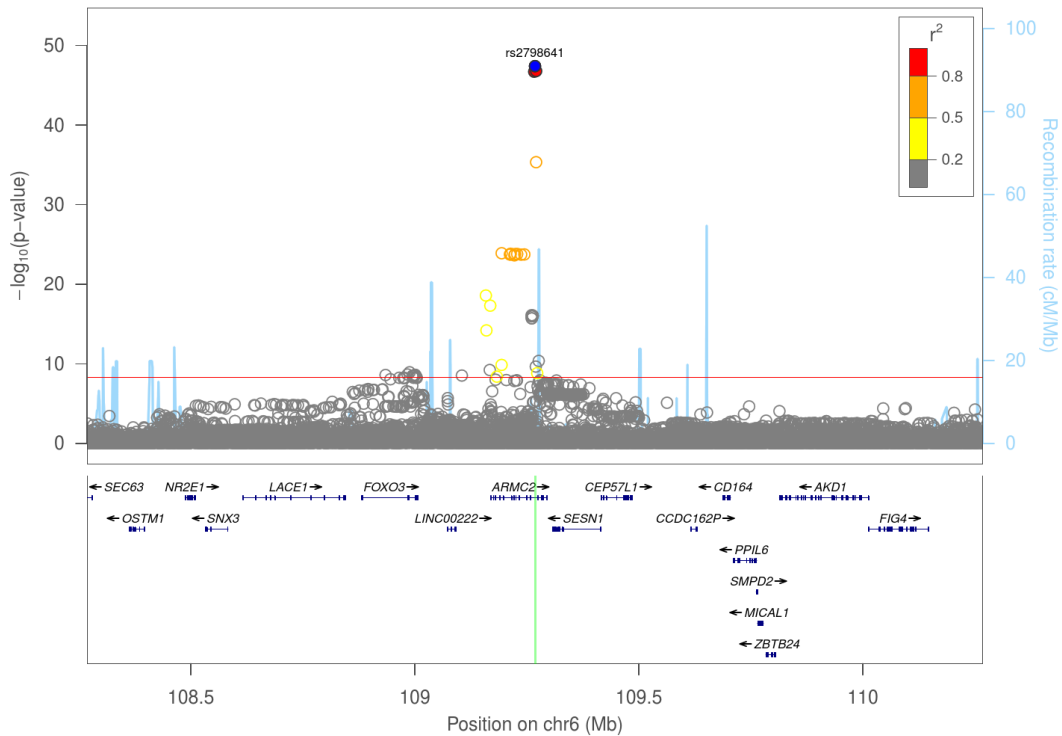

**MIR588, FVC** previous signal rs11759026, new signal rs6918725

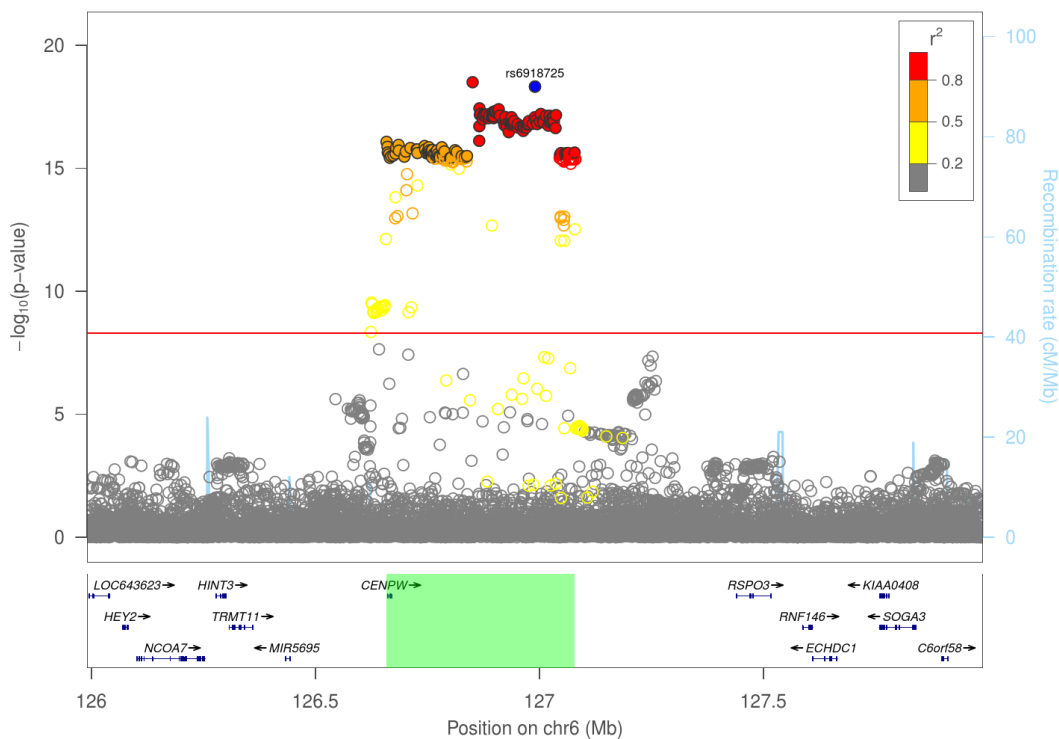

**GPR126, FEV<sub>1</sub>/FVC** previous signal rs148274477, new signal rs17280293

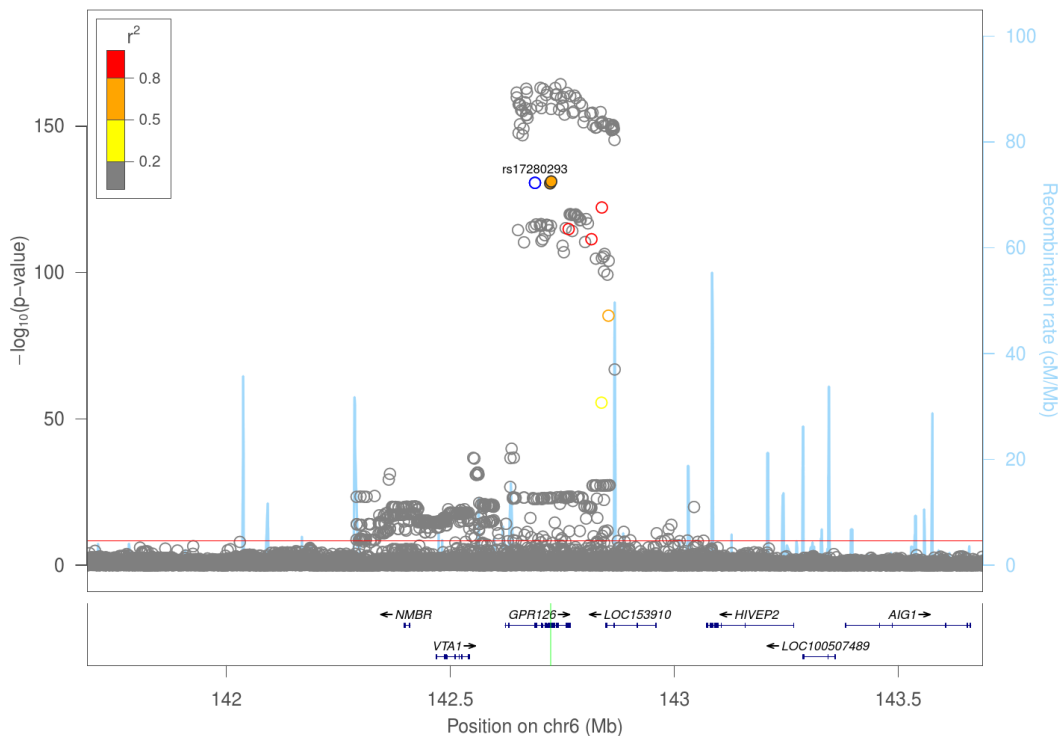

**GPR126, FEV<sub>1</sub>/FVC previous signal rs7753012, new signal rs7753012**

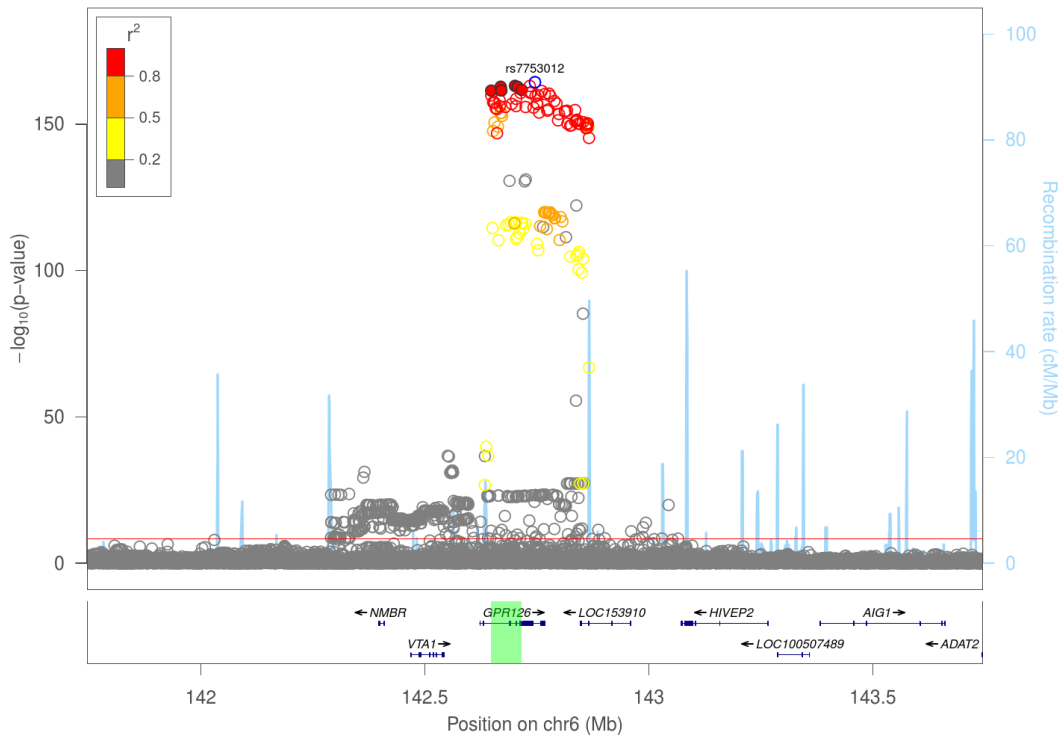

**C1GALT1, FEV<sub>1</sub>/FVC previous signal rs10246303, new signal rs4318980**

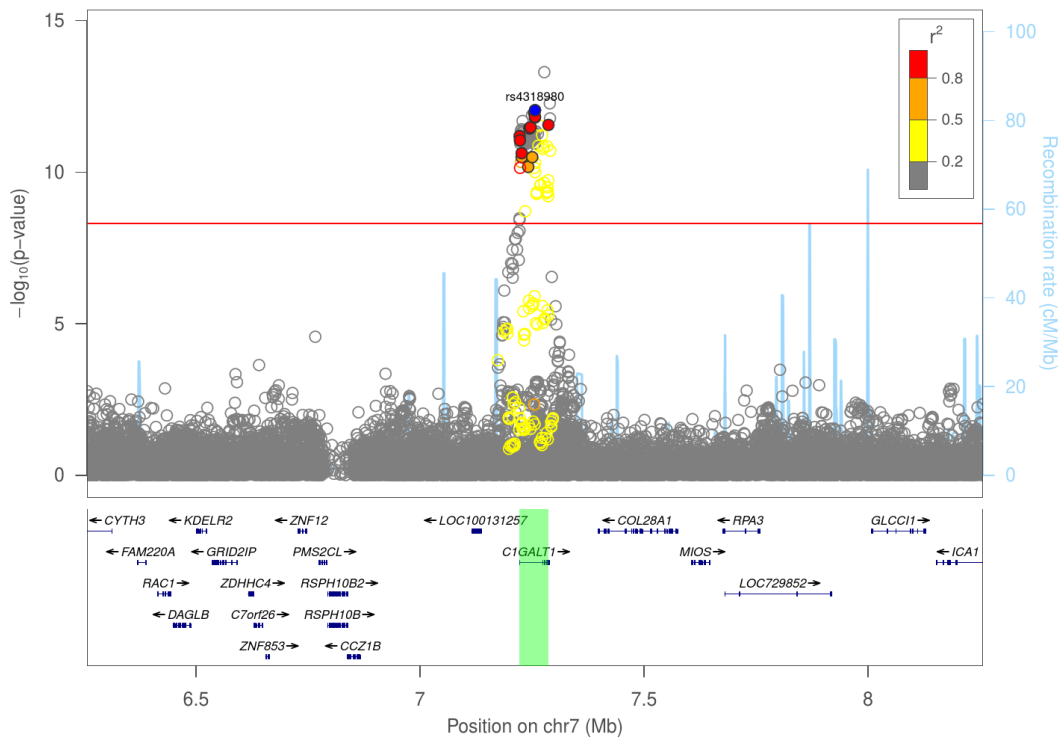



**AGMO, FVC previous signal rs55905169, new signal rs4721442**

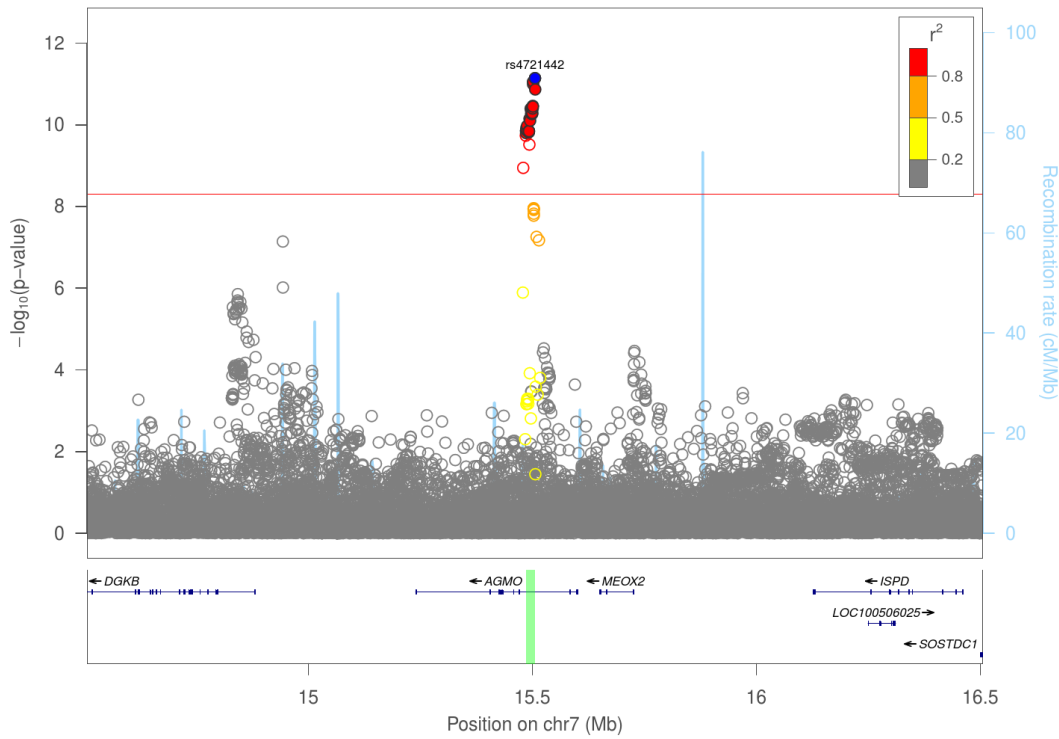

**ZKSCAN1, FEV<sub>1</sub>/FVC previous signal rs72615157, new signal rs2261360**

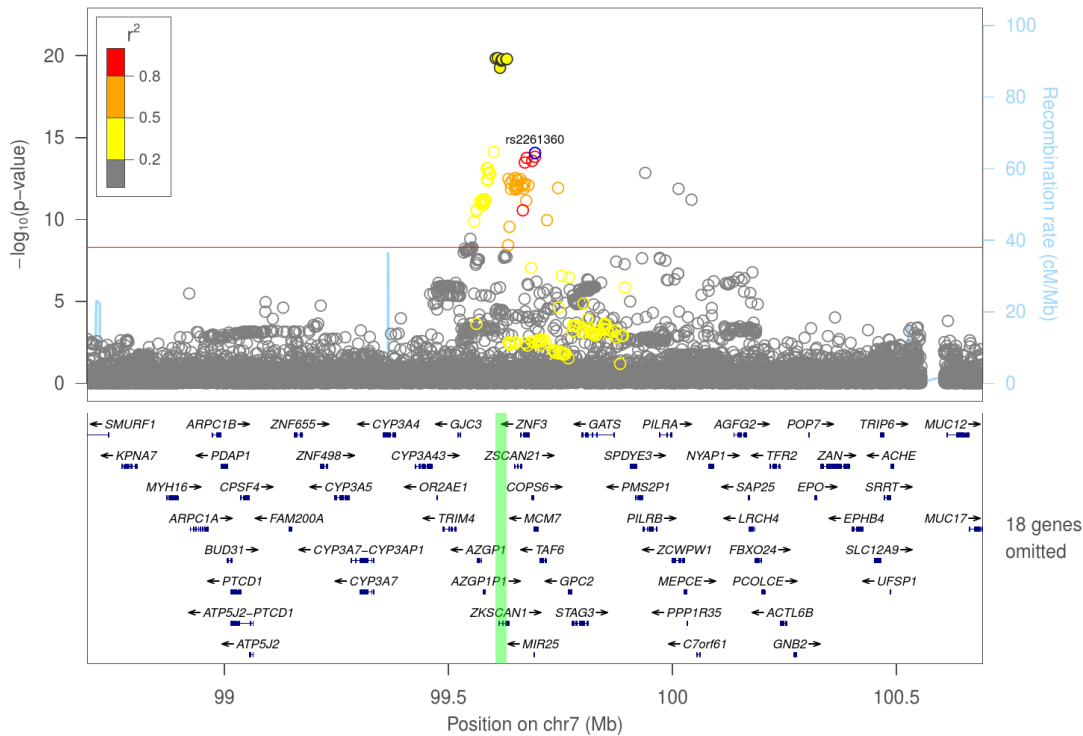

**LOC285889, FEV<sub>1</sub> previous signal rs12698403, new signal rs12698403**

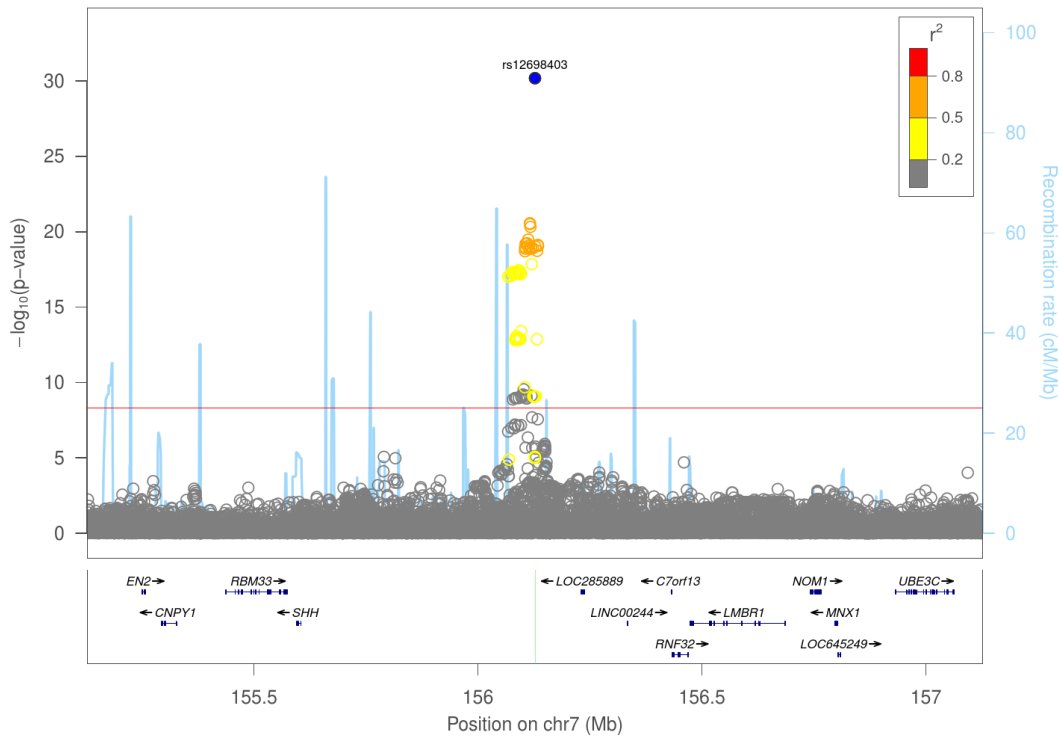

**DMRT2/SMARCA2, FVC previous signal rs771924, new signal rs771662**

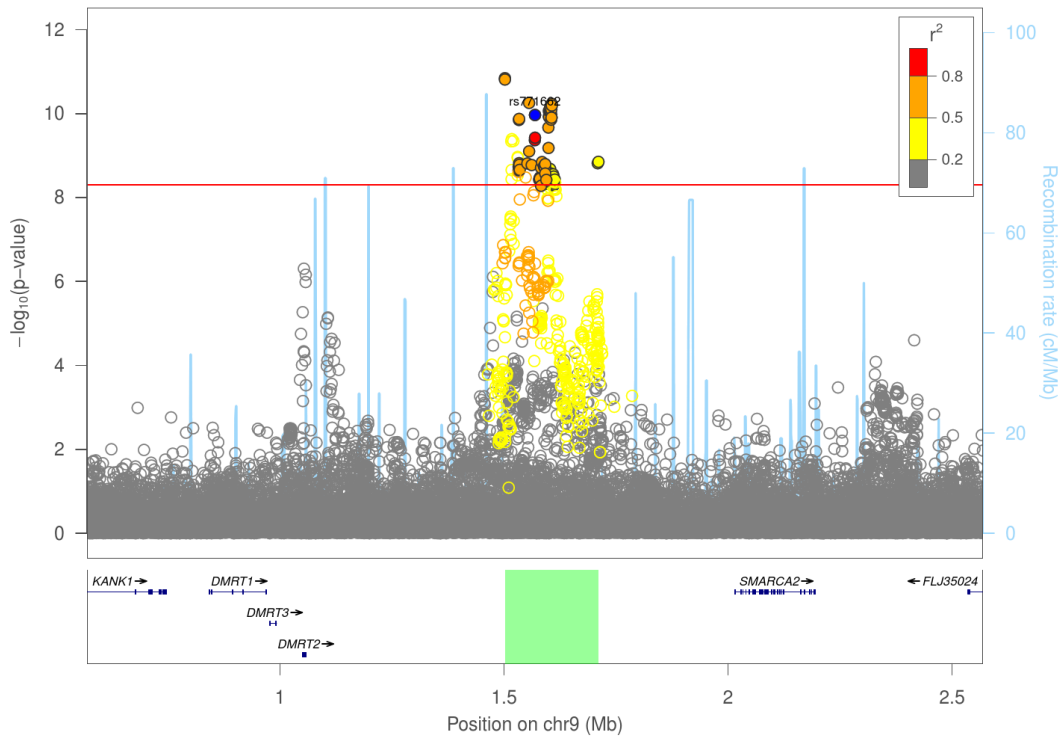

**GLIS3, FEV<sub>1</sub>/FVC previous signal rs7872188, new signal rs1570203**

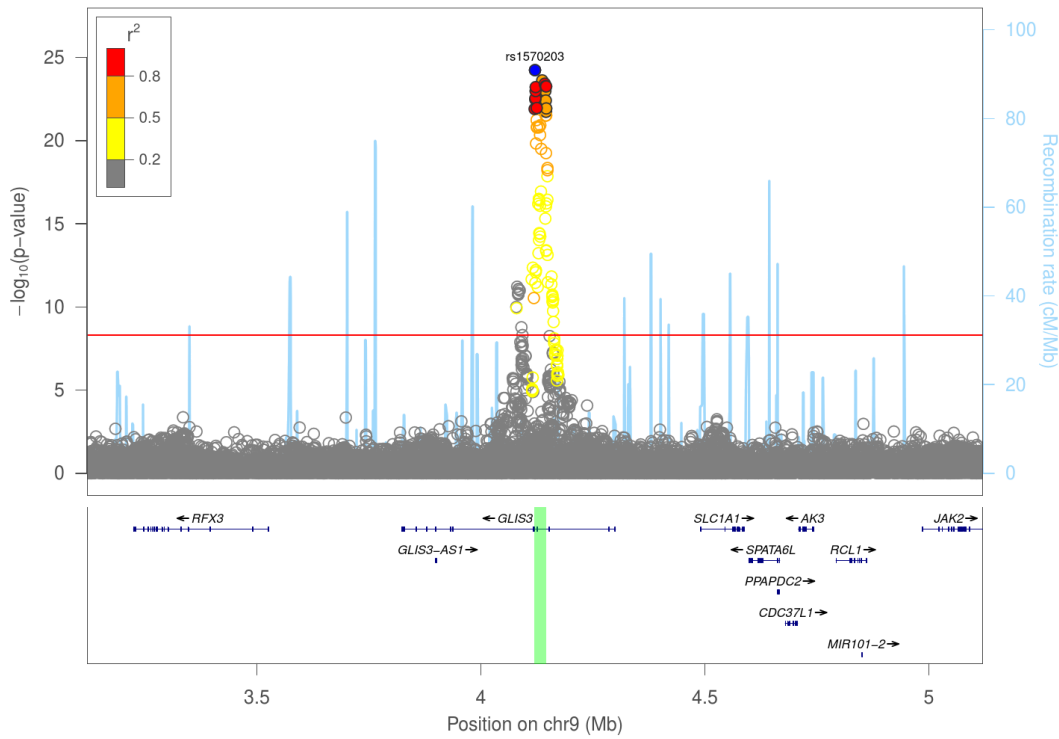

**FLJ35282/ELAVL2, FEV<sub>1</sub>/FVC previous signal rs10965947, new signal rs1107677**

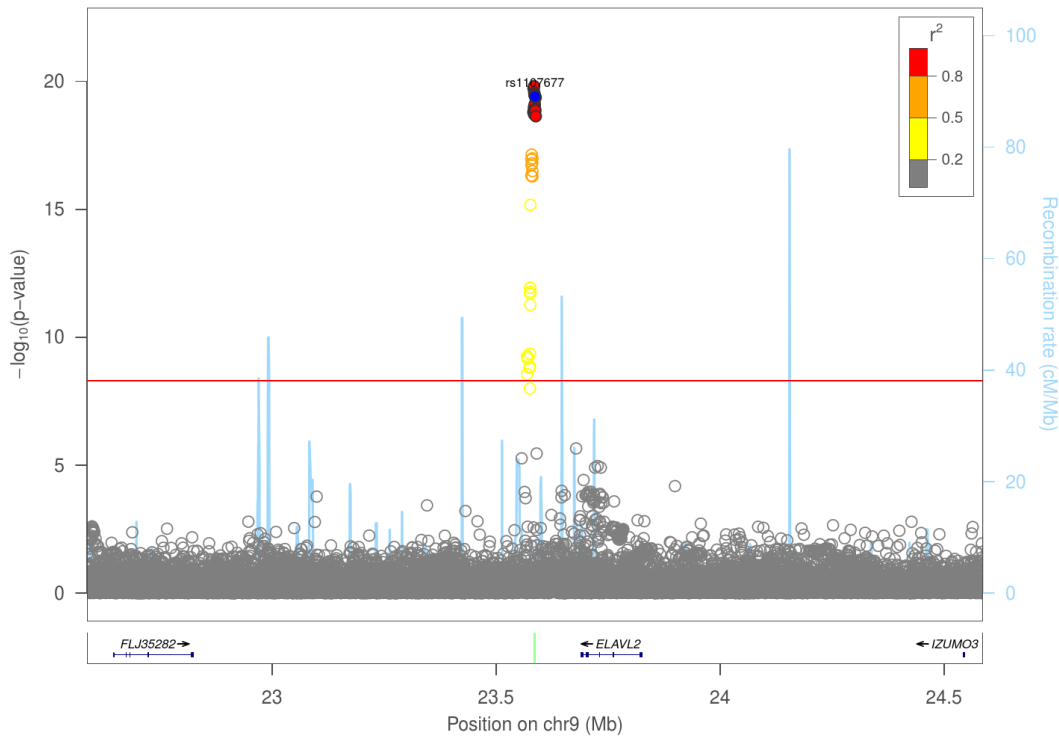

***PTCH1*, *FEV*<sub>1</sub>/*FVC* previous signal rs16909859, new signal rs28446321**

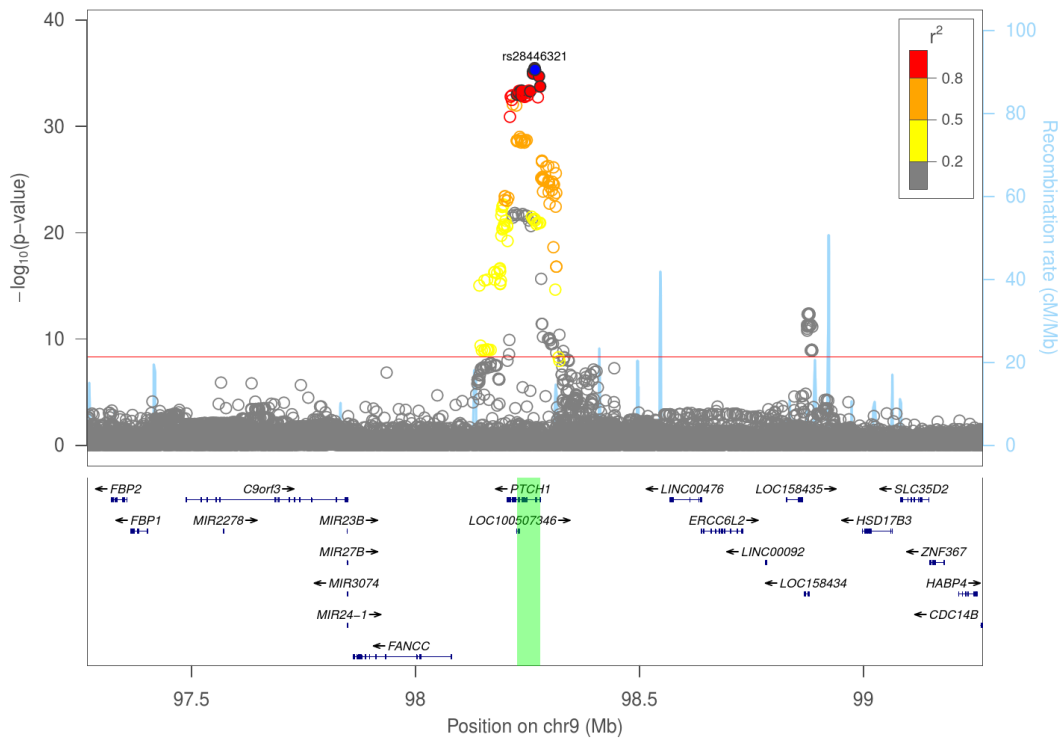

***TMEM38B*/*ZNF462*, *FEV*<sub>1</sub>/*FVC* previous signal rs2451951, new signal rs1491106**

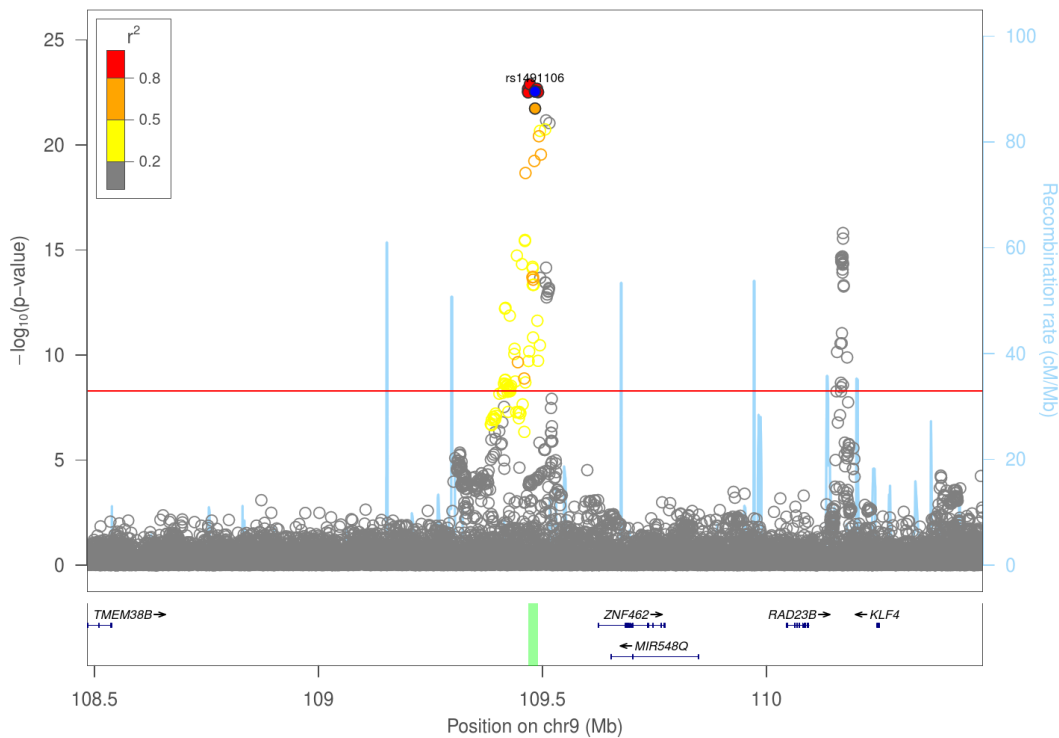

**ASTN2, FEV<sub>1</sub>/FVC previous signal rs803923, new signal rs10983184**

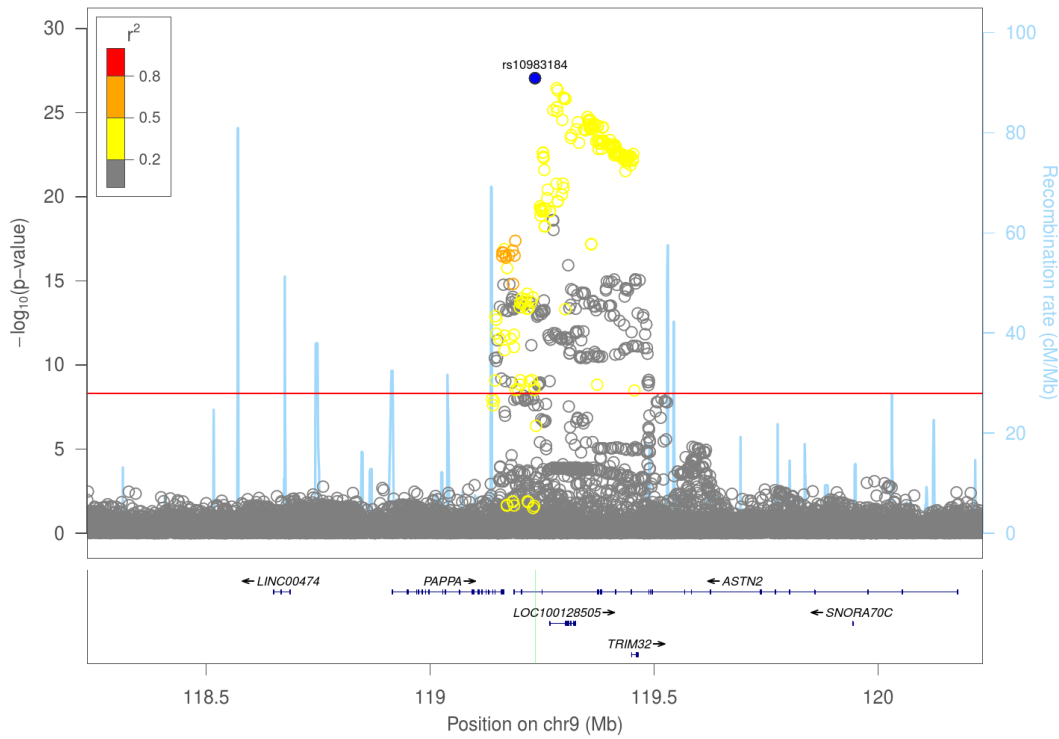

**QSOX2, FVC previous signal rs10858246, new signal rs7024579**

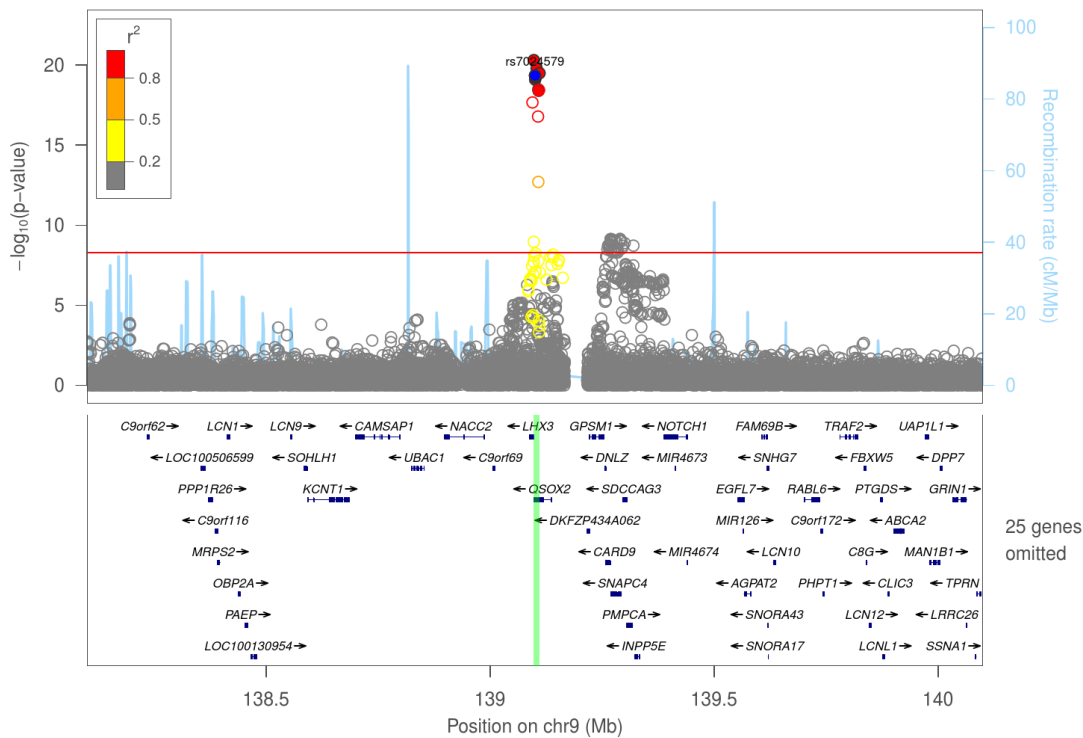

***DNLZ, FVC* previous signal rs10870202, new signal rs4073153**

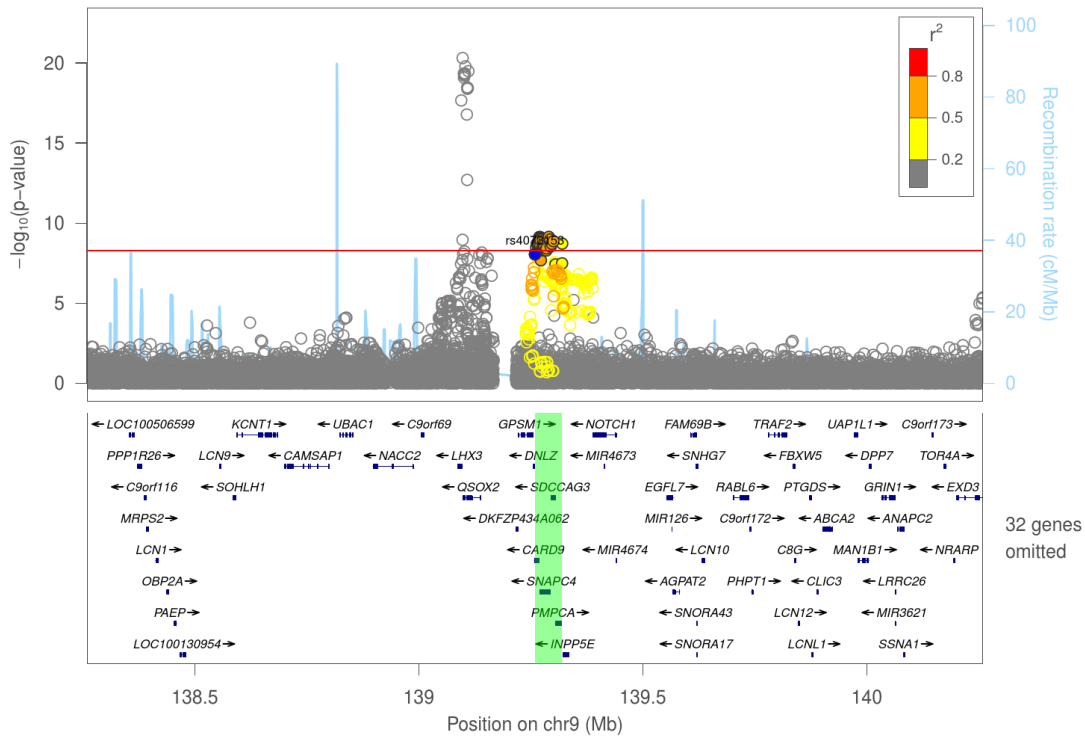

***CDC123, FEV<sub>1</sub>/FVC* previous signal rs7090277, new signal rs7090277**

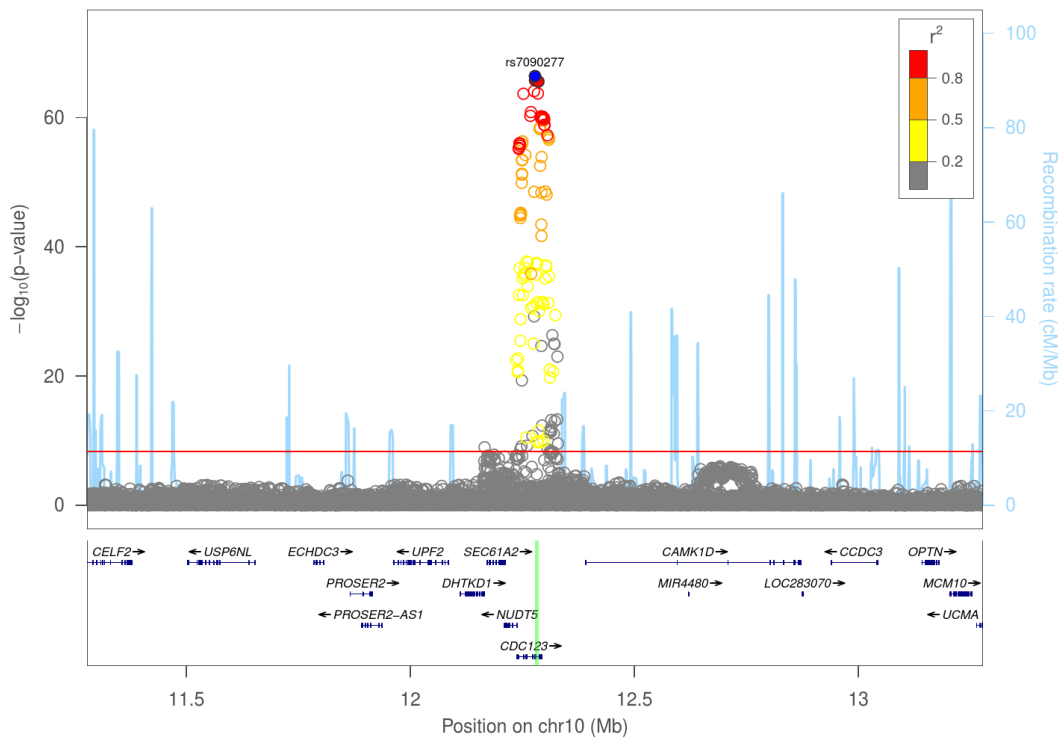

**KIAA1462, PEF** previous signal rs3847402, new signal rs7914842

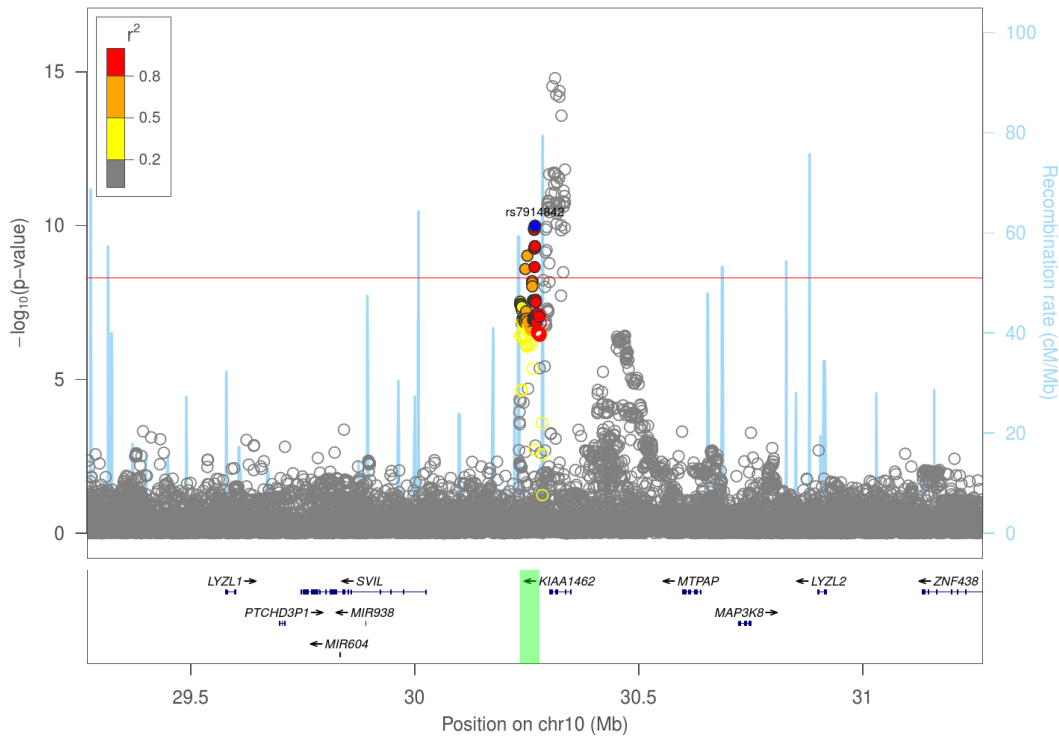

**JMJD1C, FEV<sub>1</sub>** previous signal rs7899503, new signal rs7082066

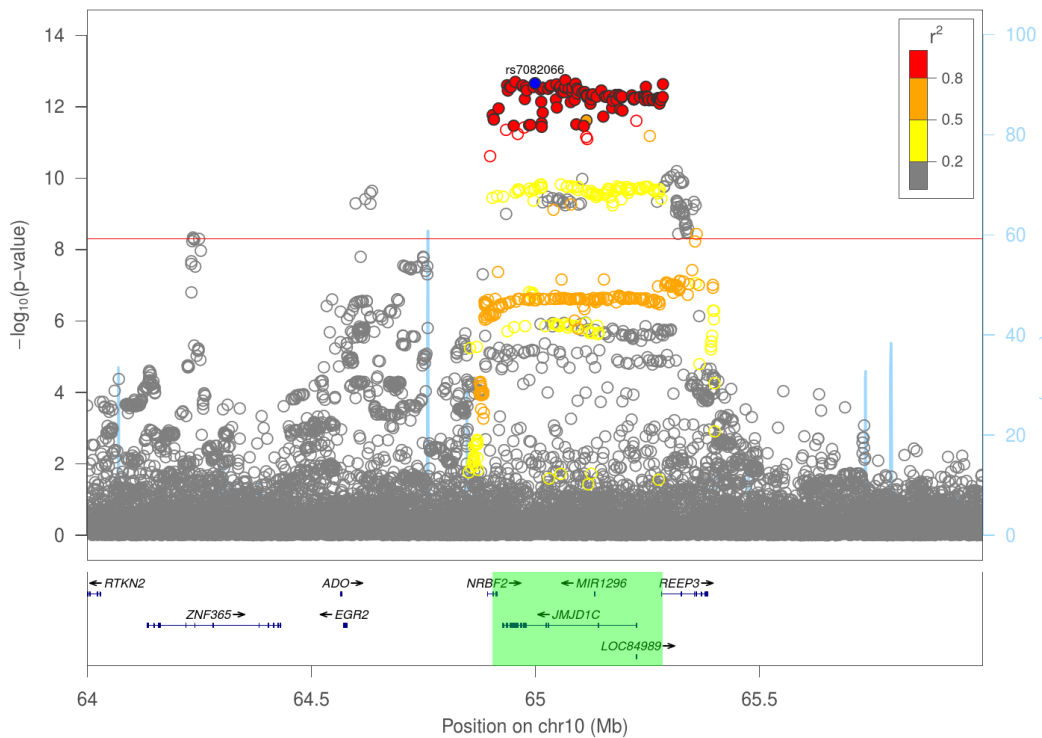

**MYPN, FVC** previous signal rs7095607, new signal rs10998018

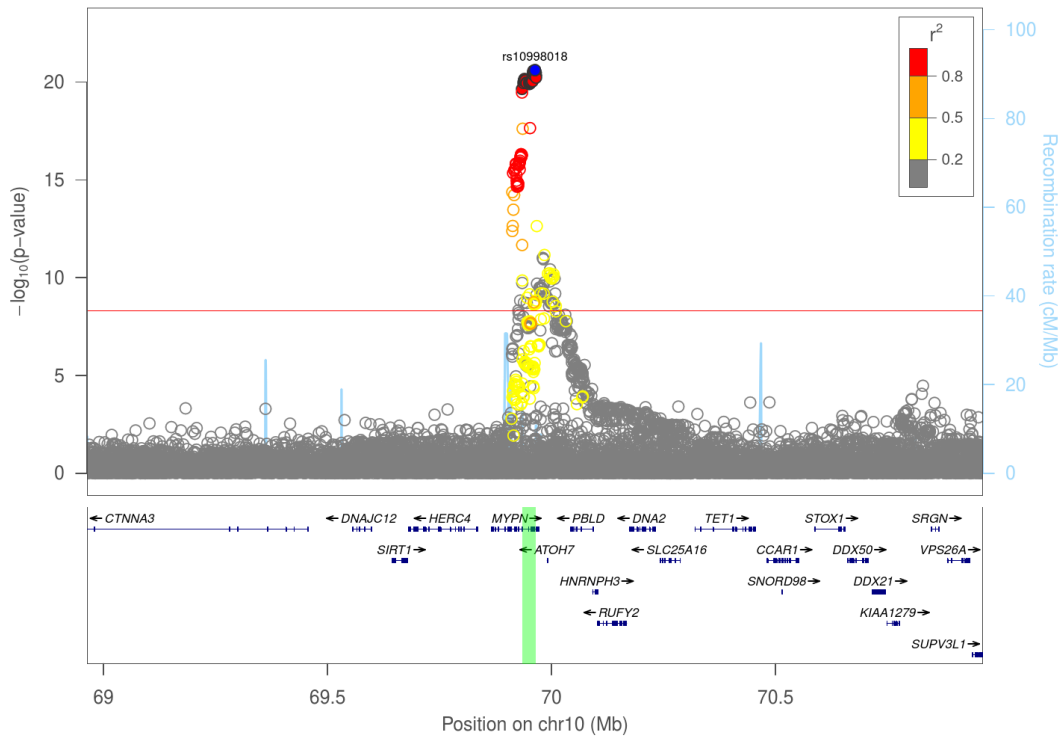

**CAMK2G, FEV<sub>1</sub>** previous signal rs3849969, new signal rs7098573

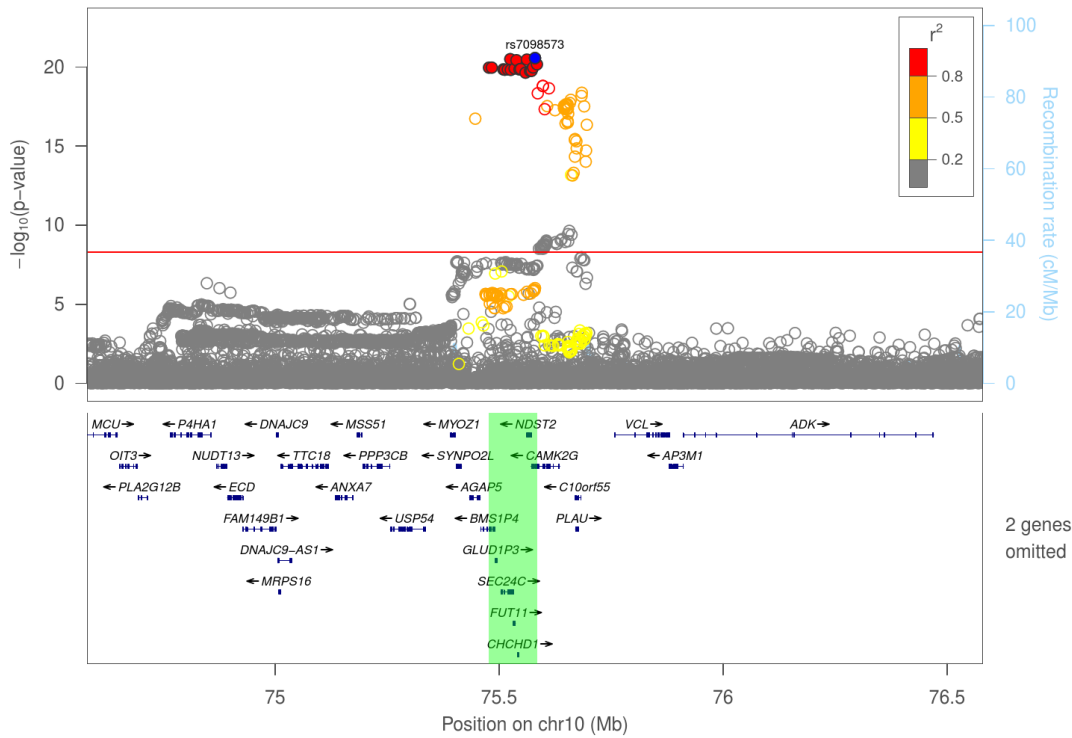



**COMTD1/ZNF503-AS1, FVC previous signal rs1259524, new signal rs1259605**

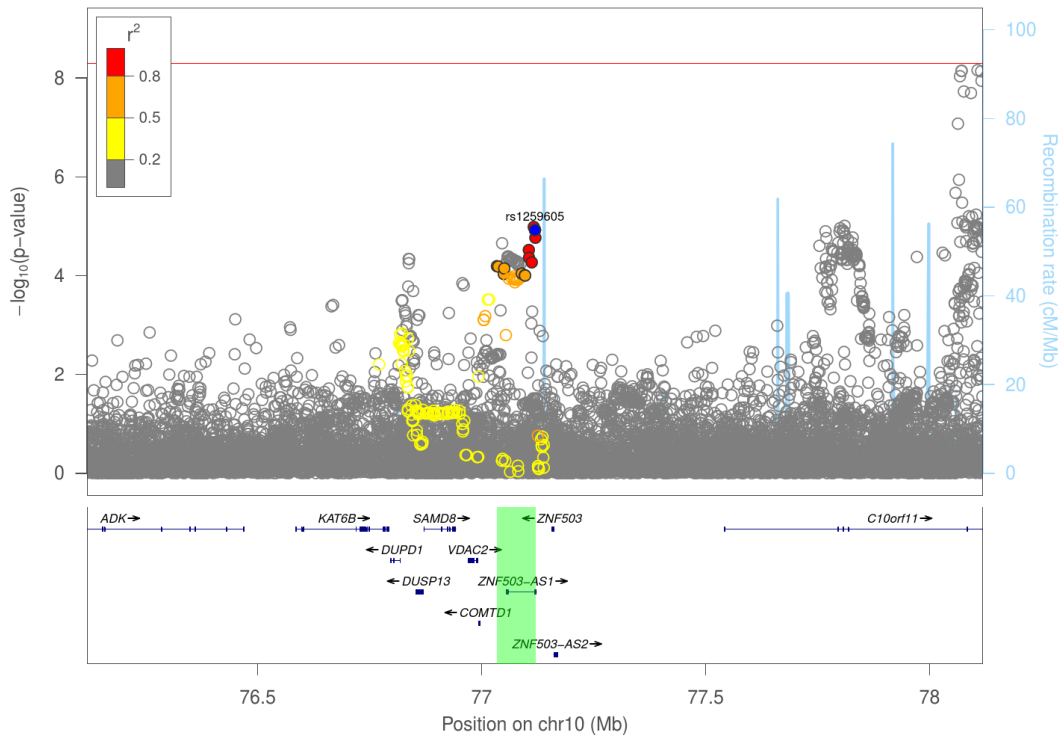

**C10orf11, FEV<sub>1</sub> previous signal rs2637254, new signal rs2637254**

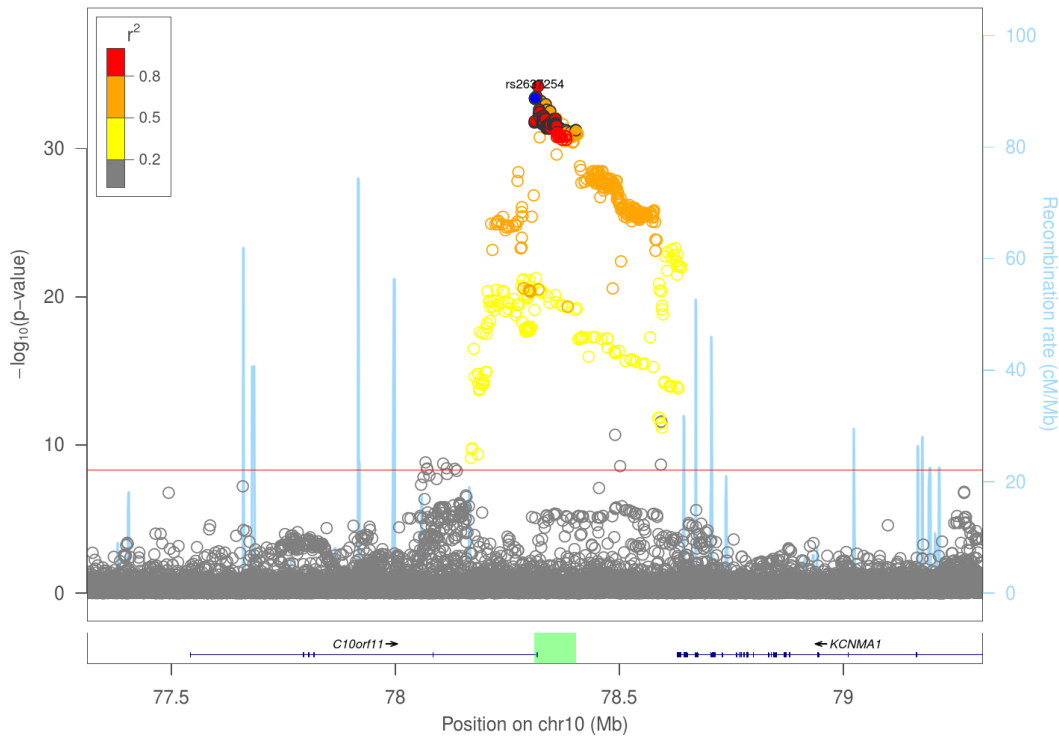

**SFTPD, FEV<sub>1</sub>/FVC previous signal rs2256462, new signal rs721917**

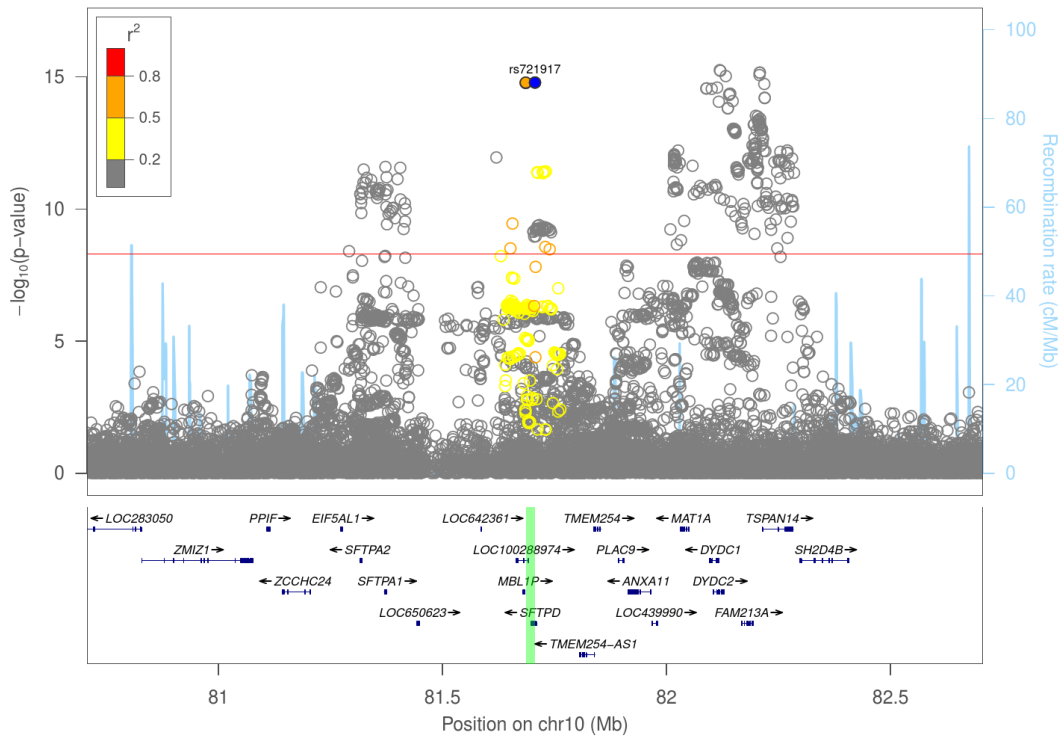

**HTRA1, FEV<sub>1</sub>/FVC previous signal rs2293871, new signal rs4279944**

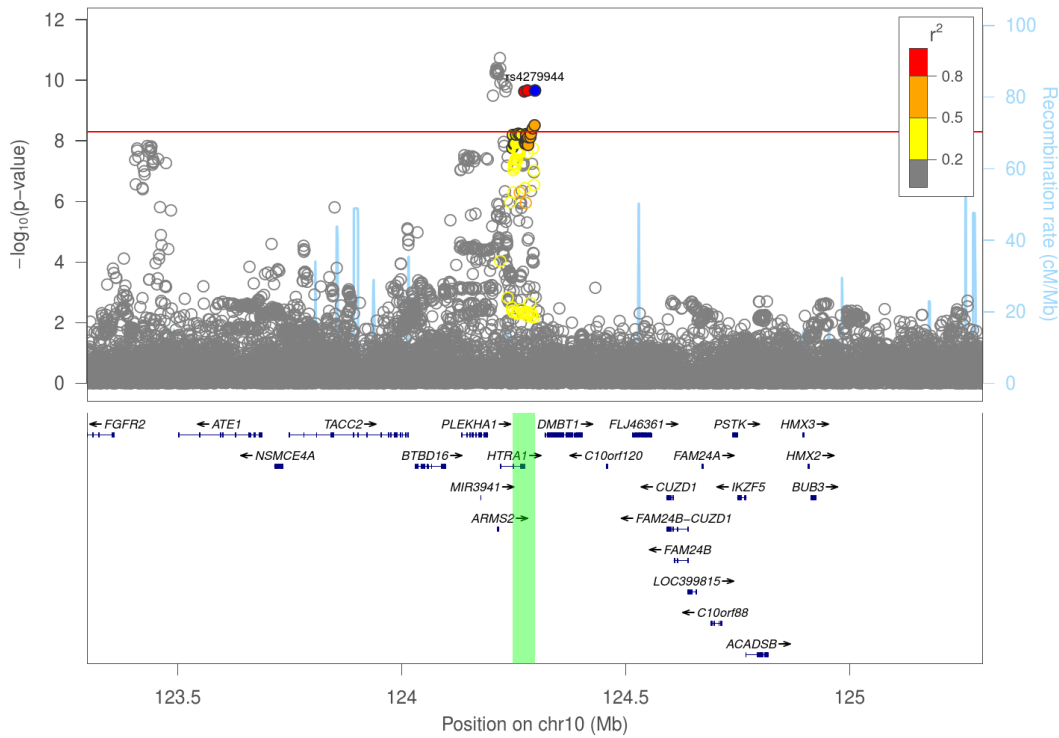

**HSD17B12, FVC** previous signal rs4237643, new signal rs17596617

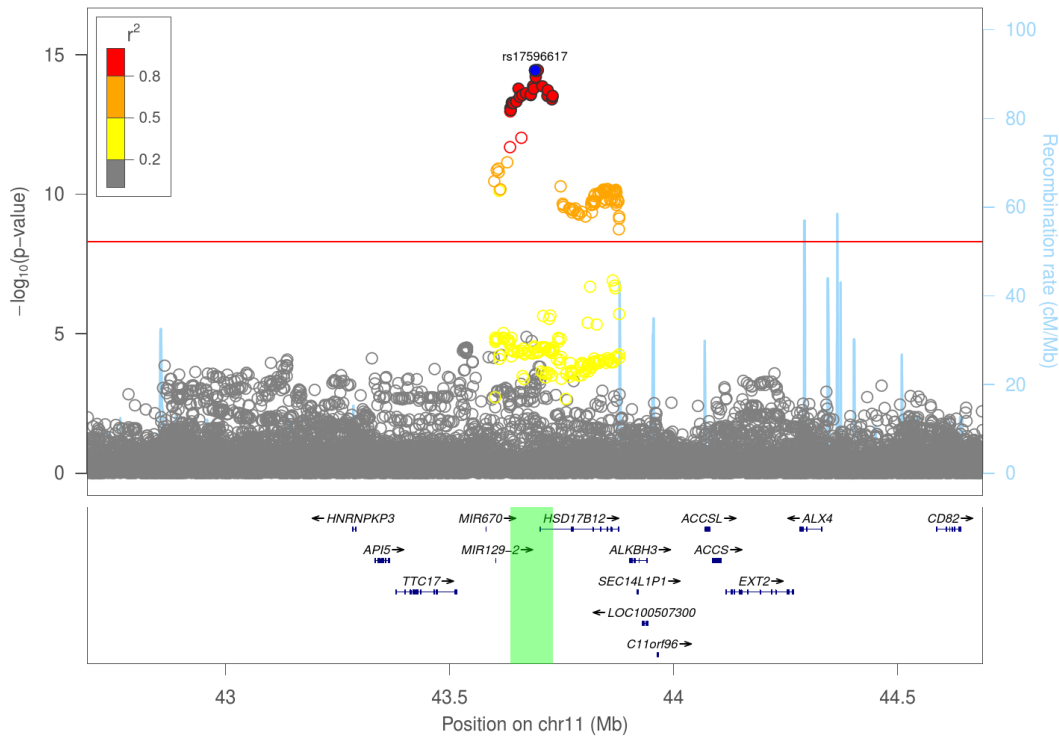

**PRDM11, FEV<sub>1</sub>** previous signal rs2863171, new signal rs10838435

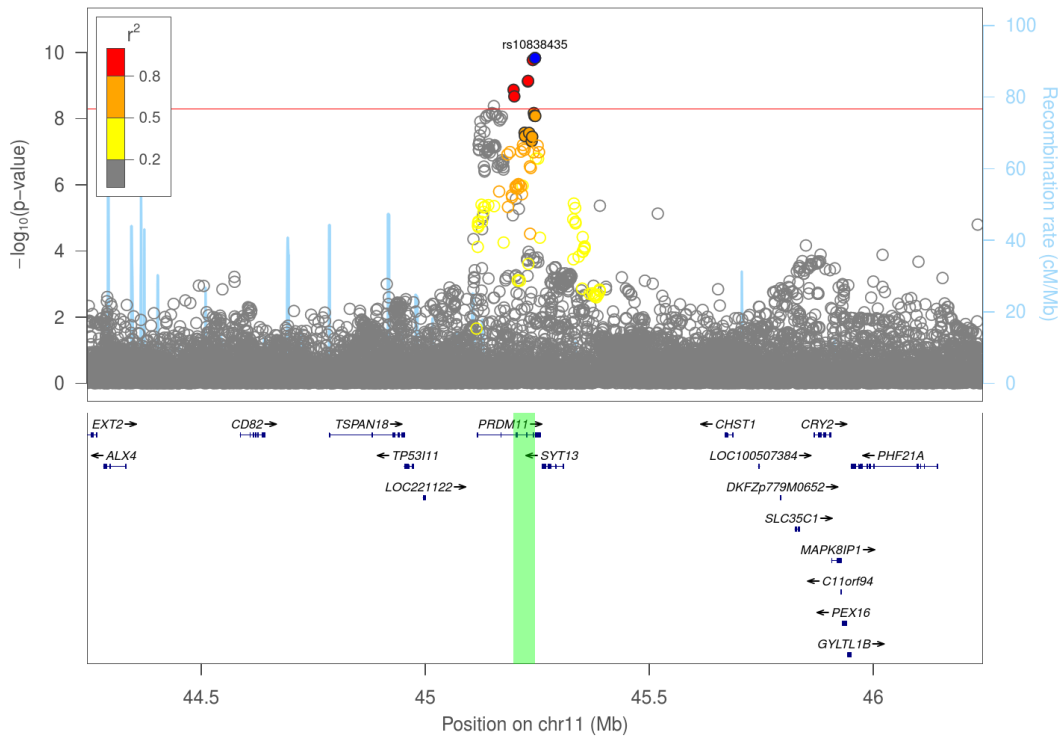

**EML3, FEV<sub>1</sub> previous signal rs2509961, new signal rs71490394**

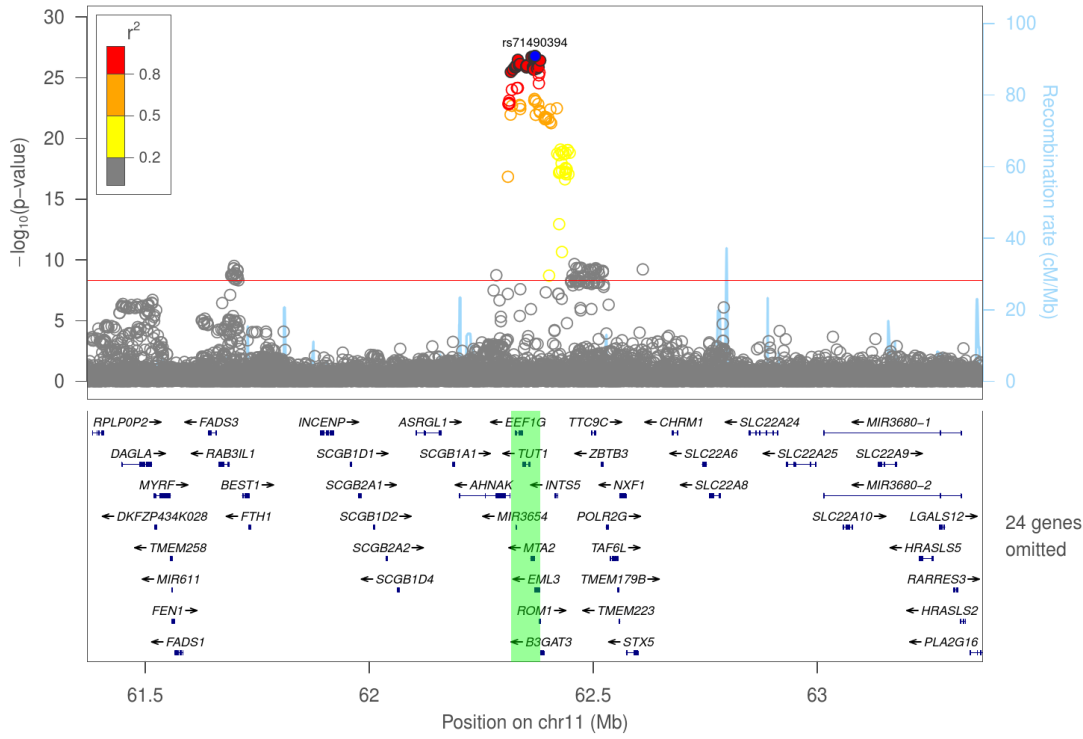

**ARHGEF17, FEV<sub>1</sub>/FVC previous signal rs11235809, new signal rs2027761**

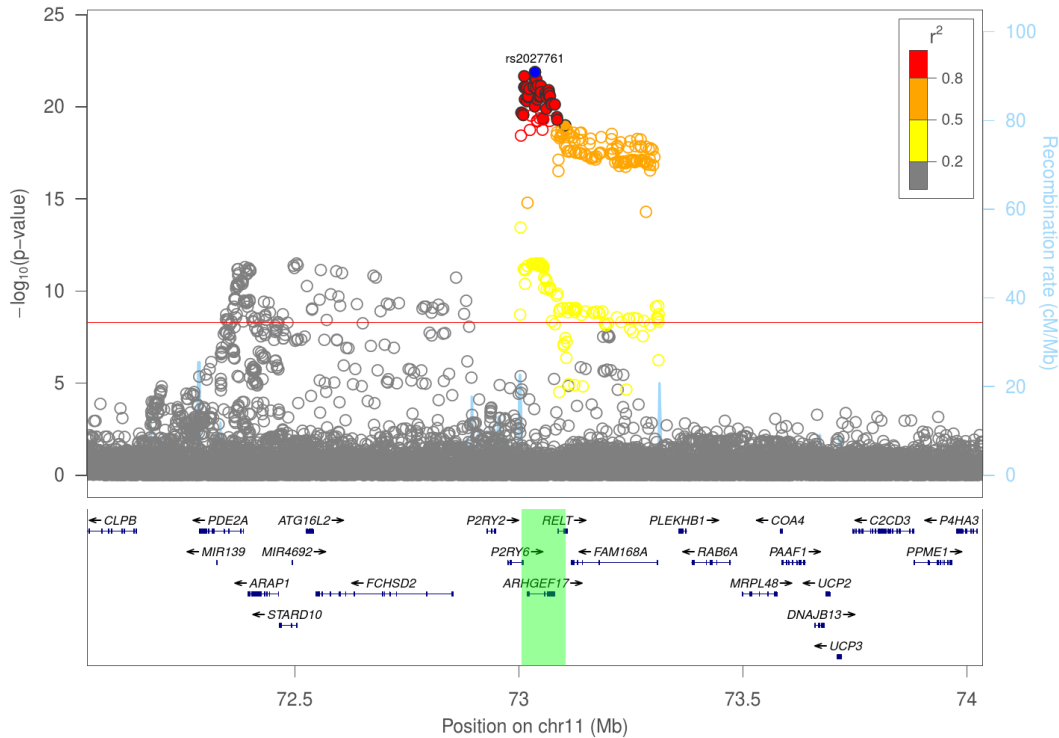

**PRSS23, FEV<sub>1</sub>/FVC previous signal rs7108254, new signal rs11234768**

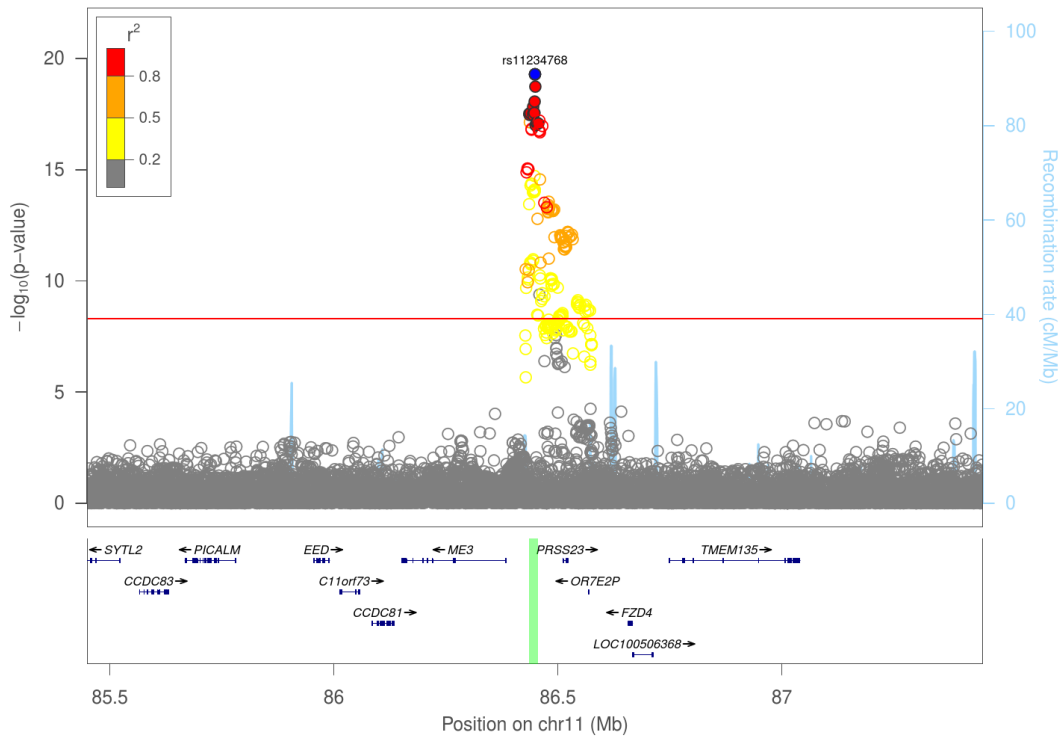

**RPUSD4, FEV<sub>1</sub>/FVC previous signal rs567508, new signal rs541601**

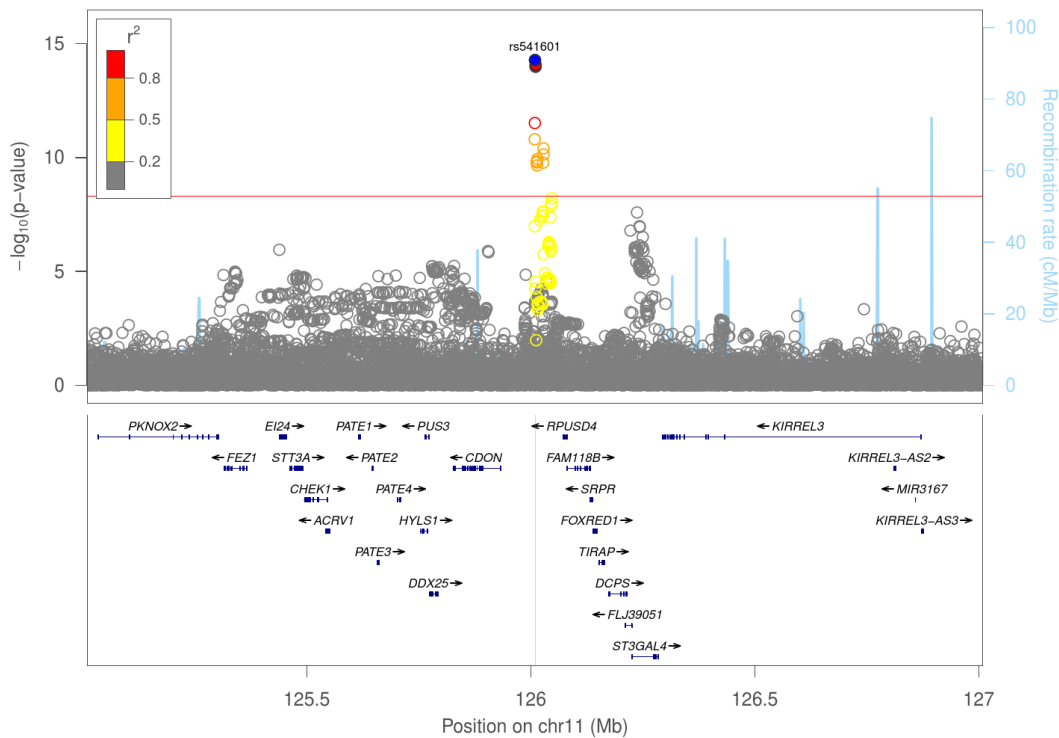

**CCDC91, FVC previous signal rs2348418, new signal rs7977418**

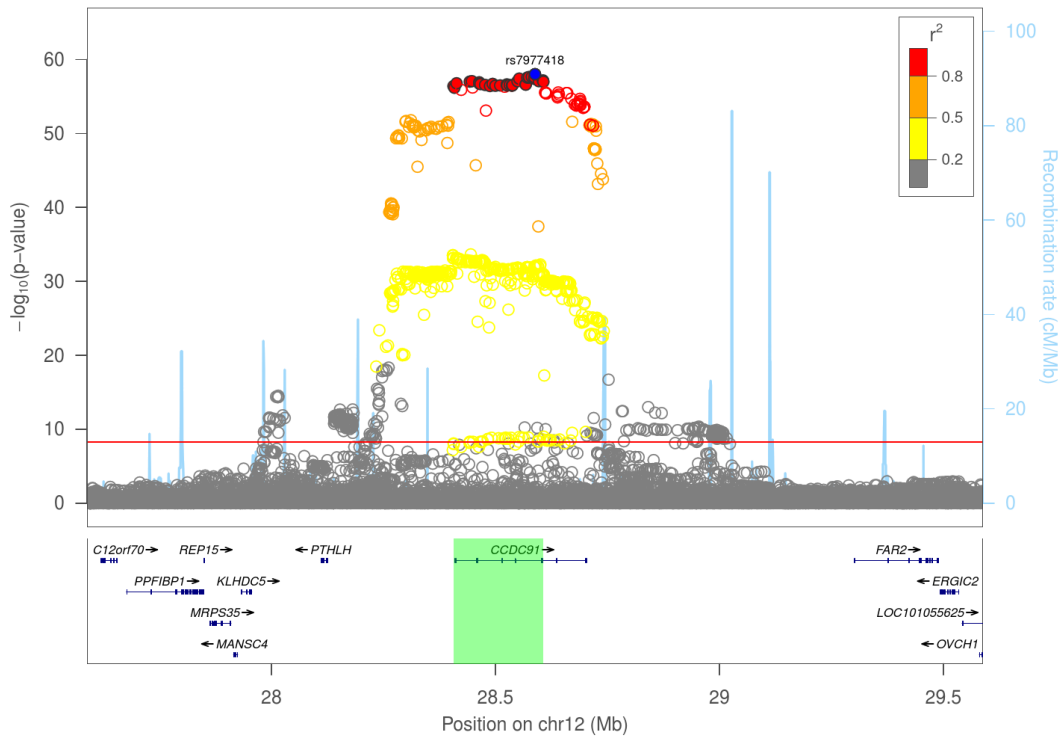

**RAB5B, FEV<sub>1</sub> previous signal rs772920, new signal rs1689510**

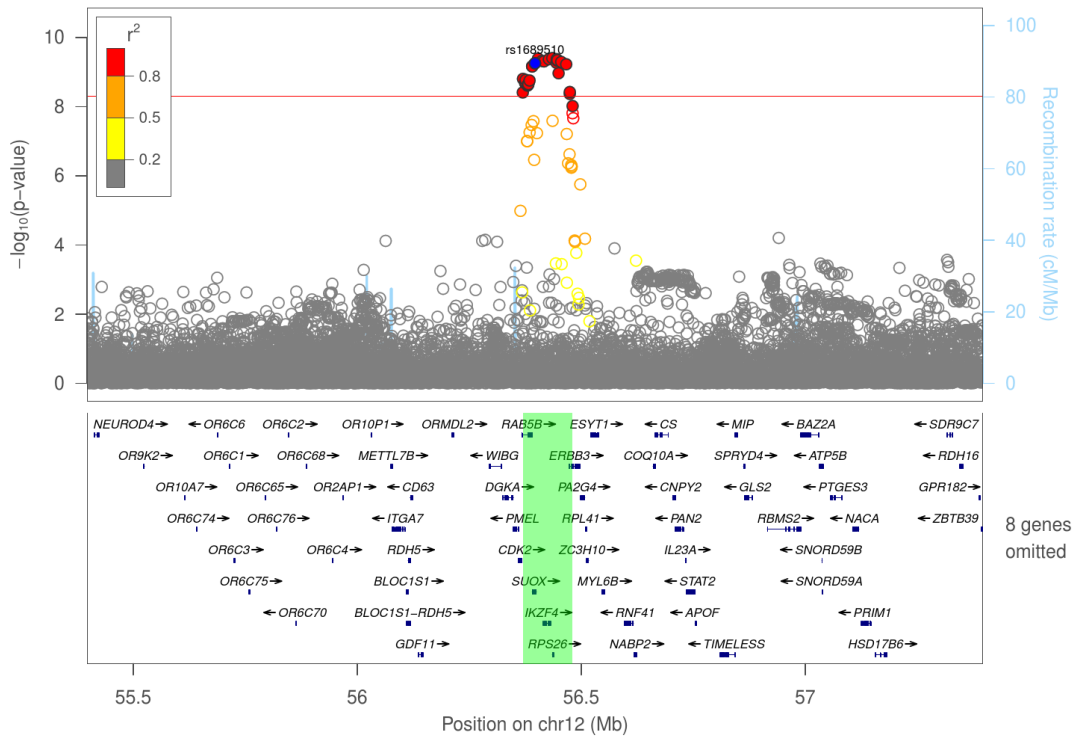

**LRP1, FEV<sub>1</sub>/FVC previous signal rs11172113, new signal rs11172113**

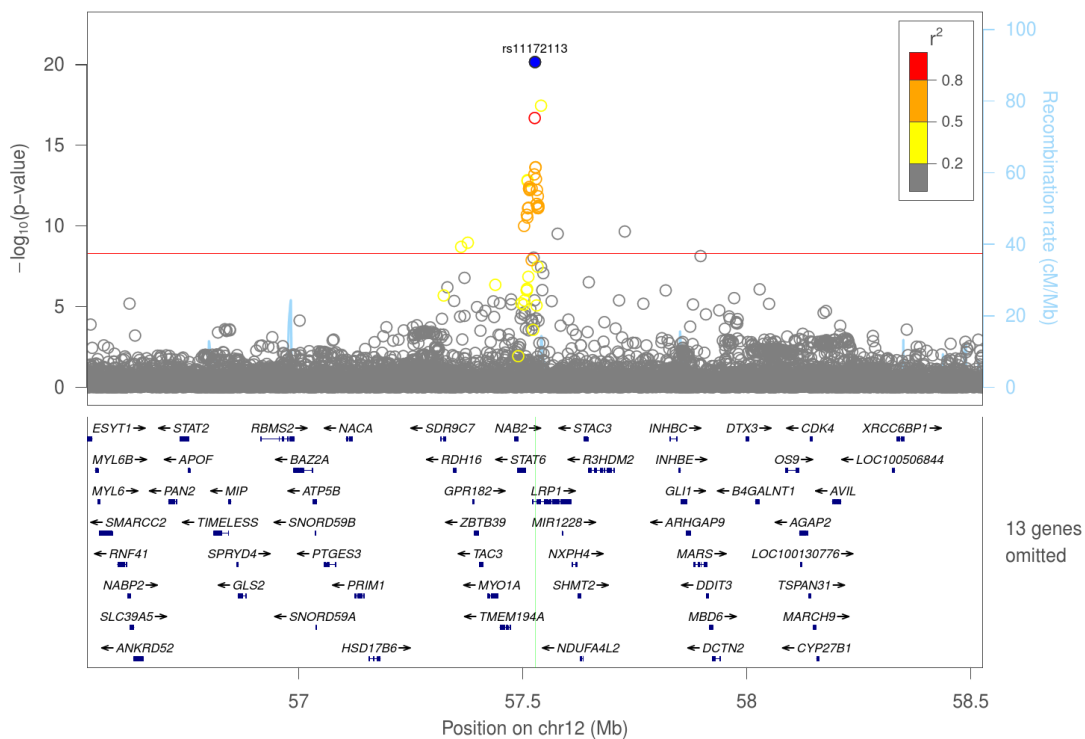

**MSRB3, FEV<sub>1</sub> previous signal rs1494502, new signal rs12825748**

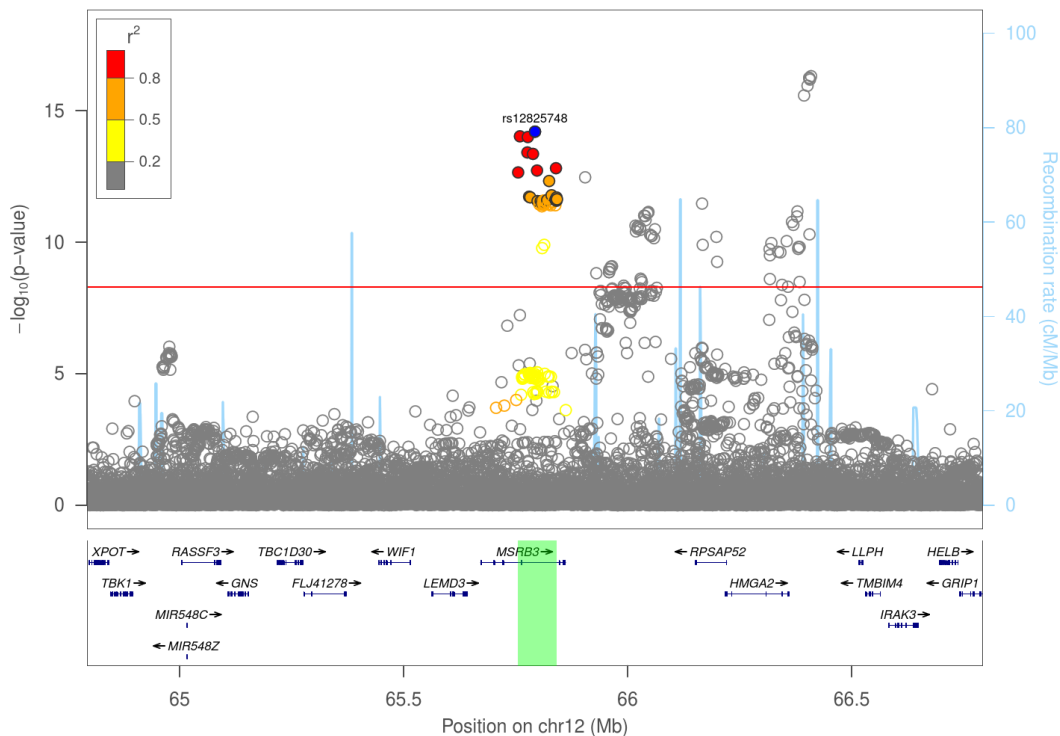

**ALX1/RASSF9, PEF previous signal rs7971039, new signal rs56390486**

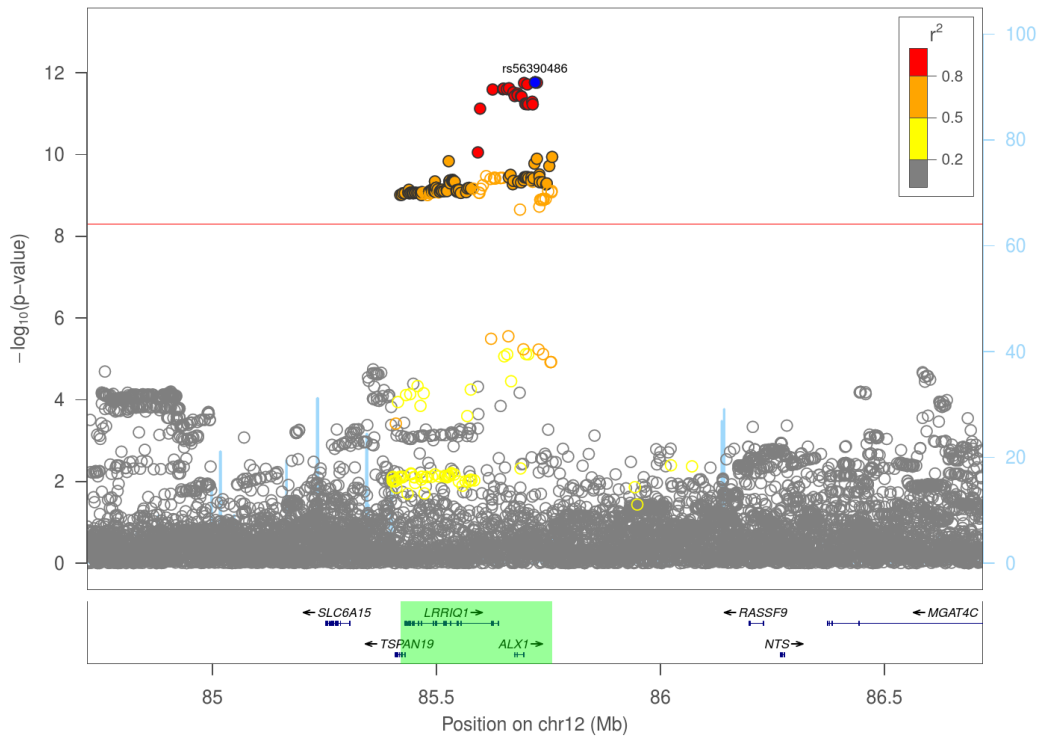

**CRADD, FVC previous signal rs11107184, new signal rs9788269**

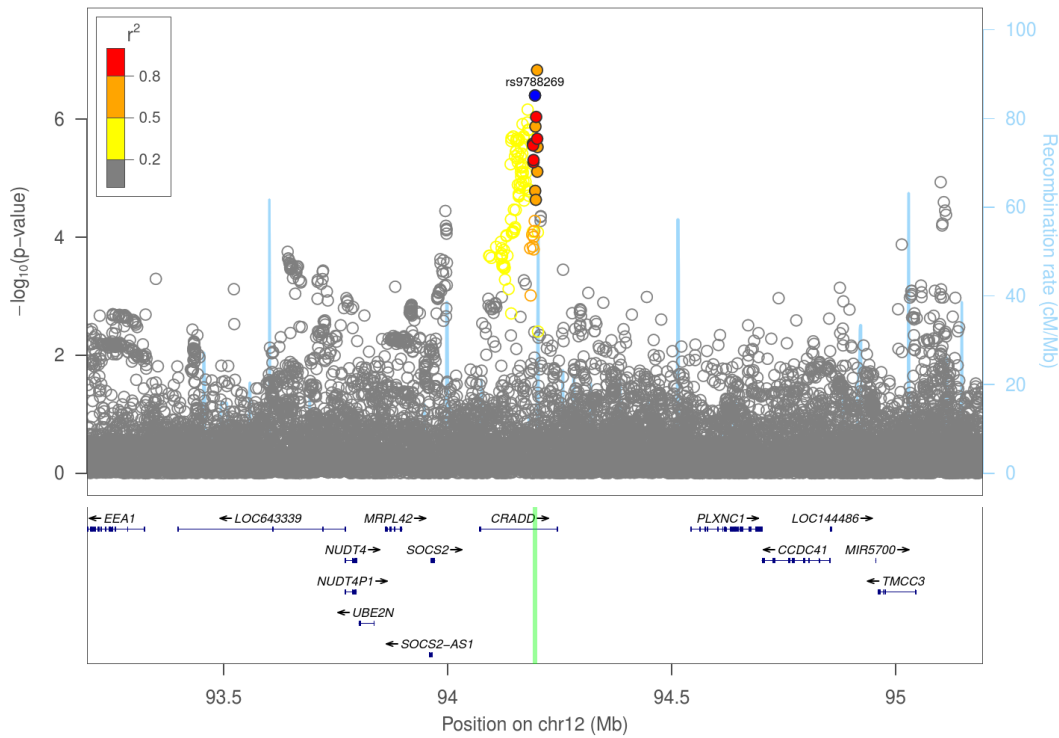



**FGD6, FEV<sub>1</sub>/FVC previous signal rs113745635, new signal rs113745635**

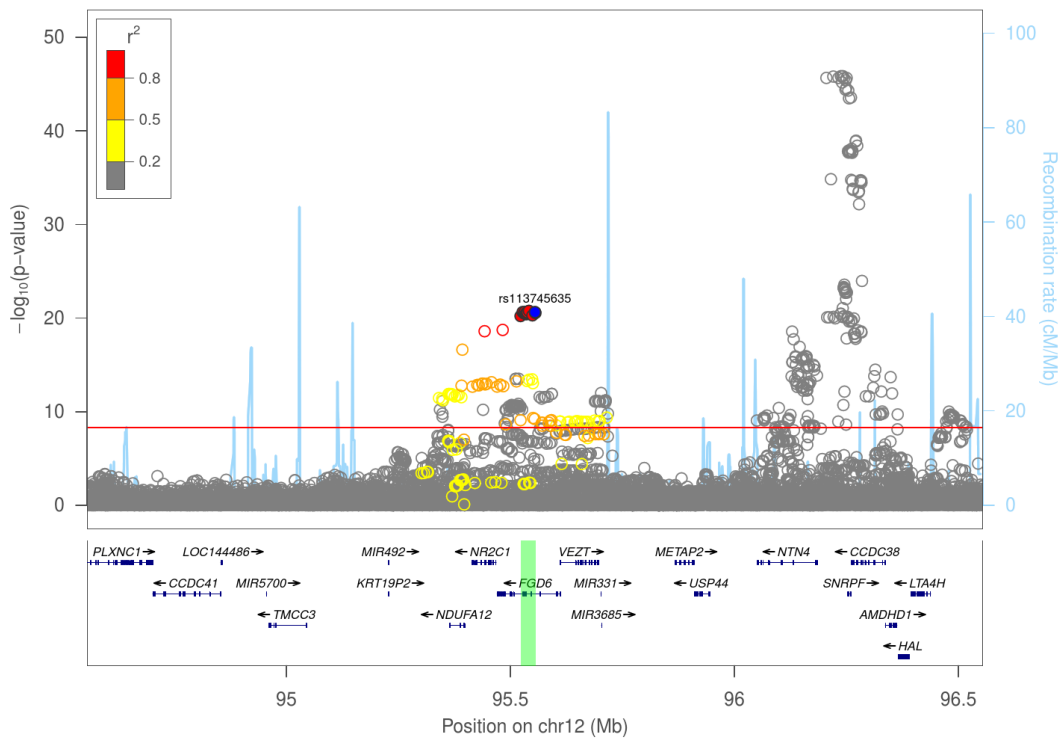

**SNRPF, FEV<sub>1</sub>/FVC previous signal rs12820313, new signal rs7970544**

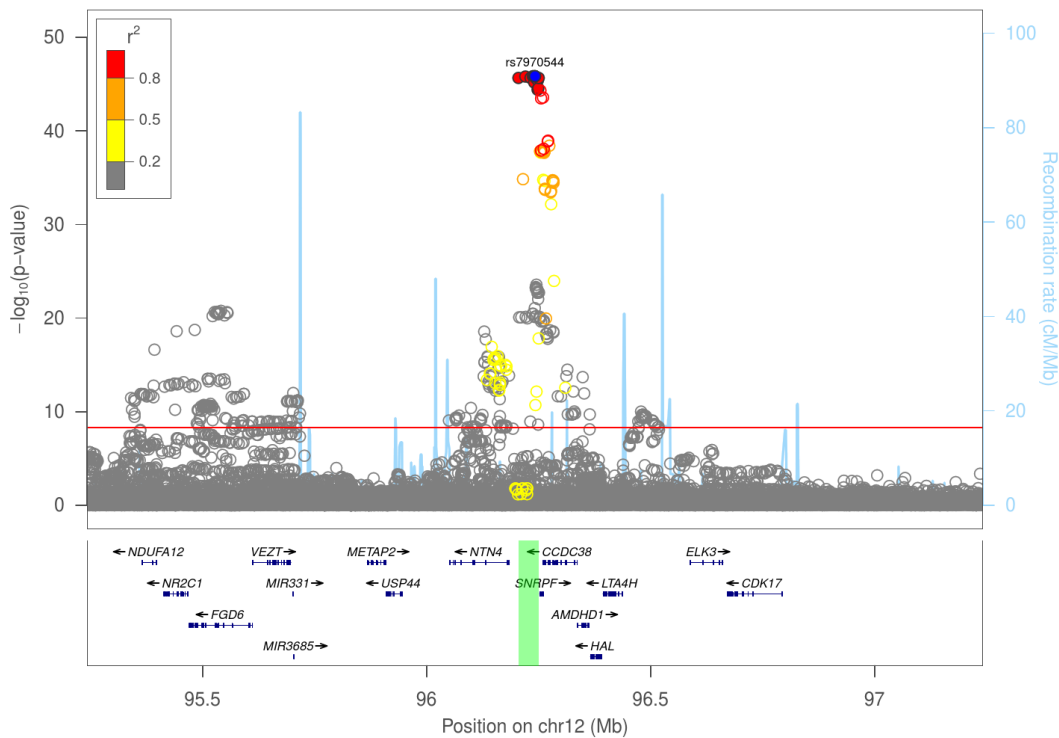

***TBX3*, *FEV1* previous signal rs10850377, new signal rs10850377**

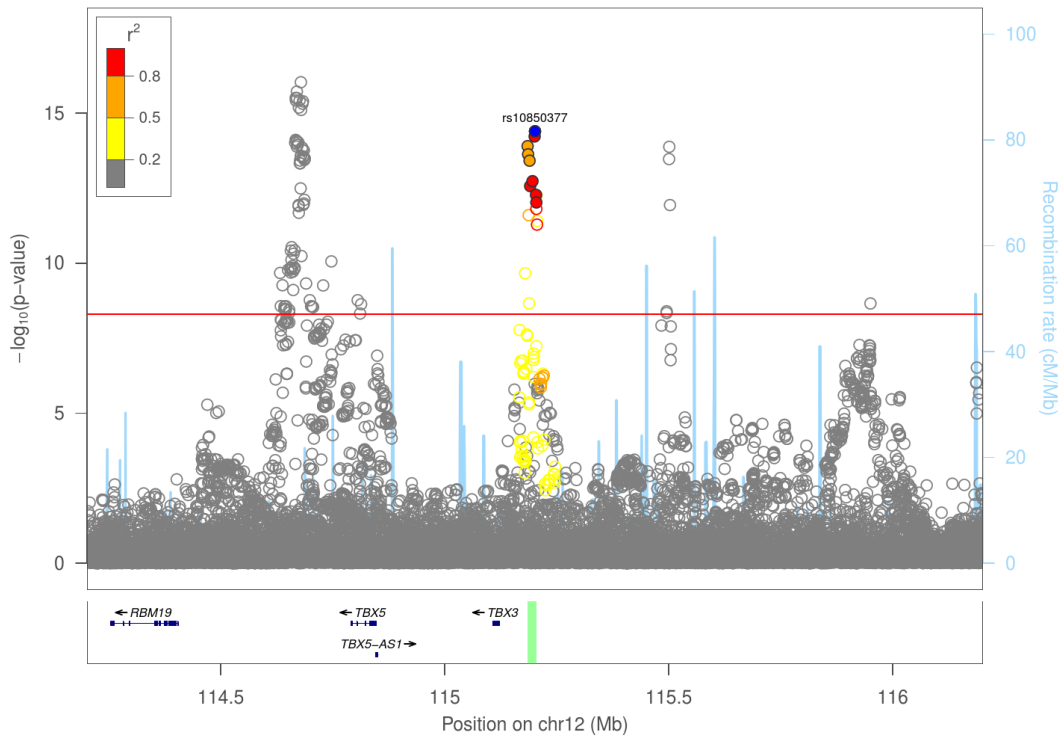

***TBX3*, *FVC* previous signal rs35506, new signal rs35505**

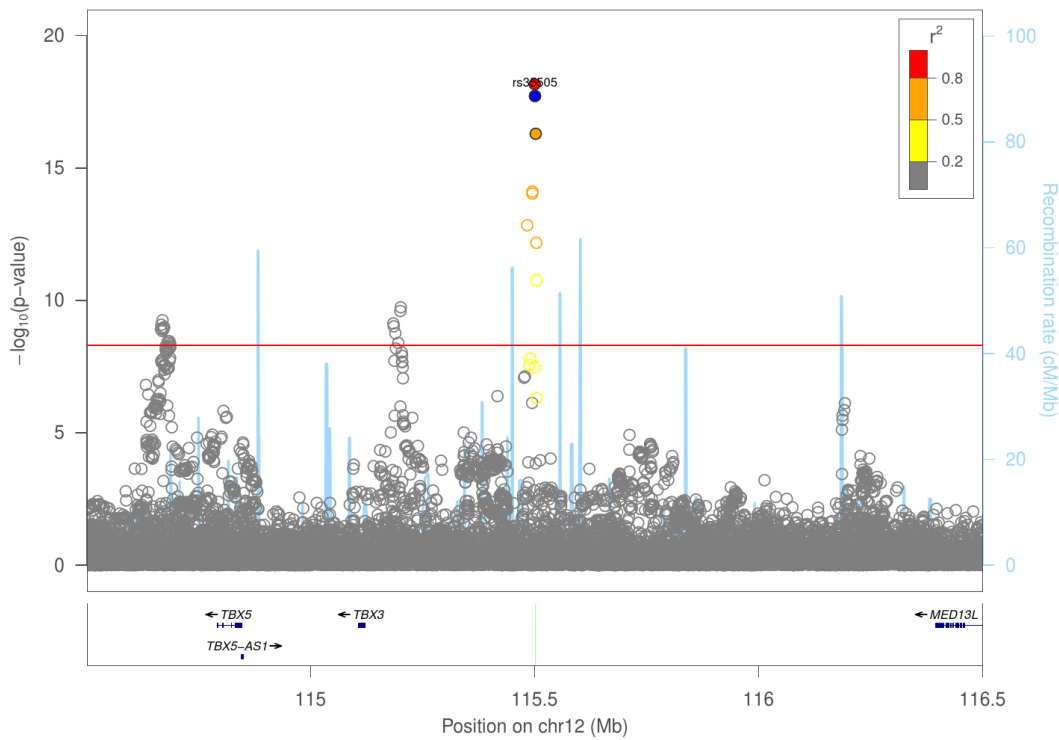

**BMP4, FEV<sub>1</sub>/FVC previous signal rs4444235, new signal rs35107139**

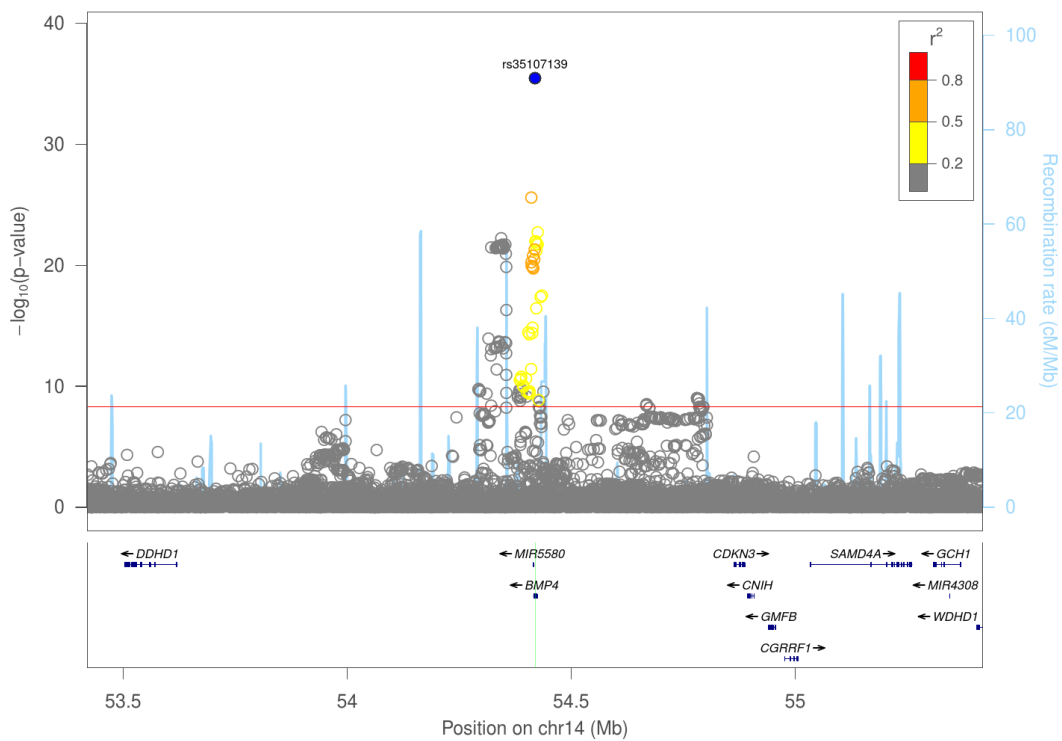

**LINC00911, FEV<sub>1</sub>/FVC previous signal rs1698268, new signal rs1756281**

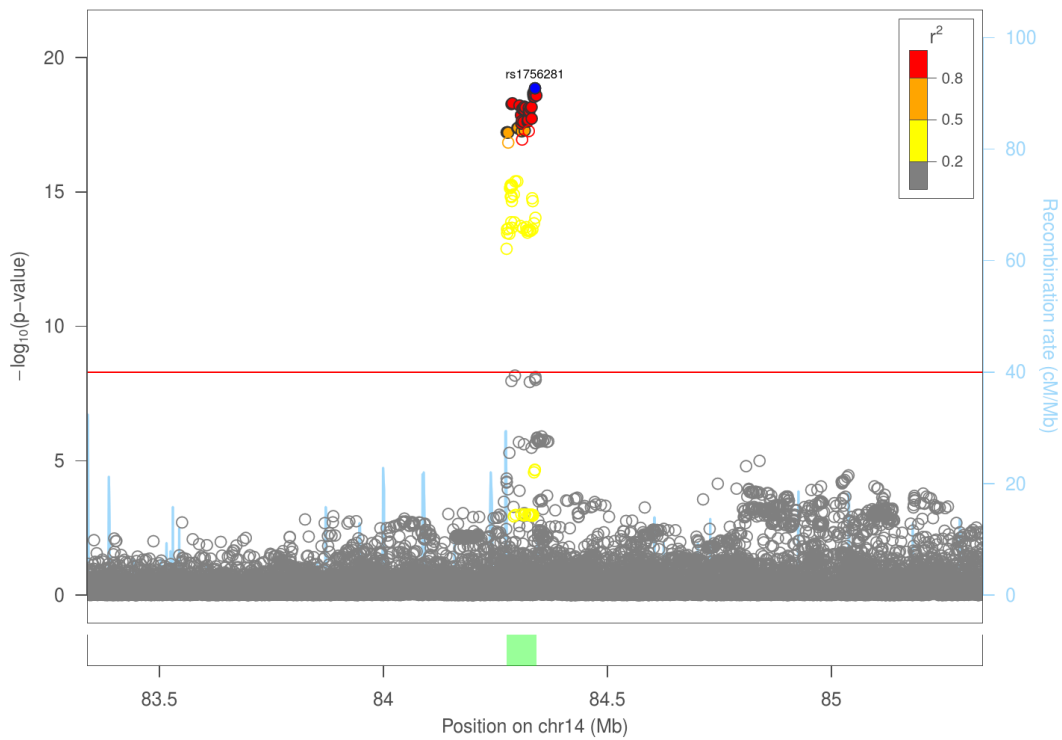

**TRIP11, FEV<sub>1</sub> previous signal rs7155279, new signal rs11160037**

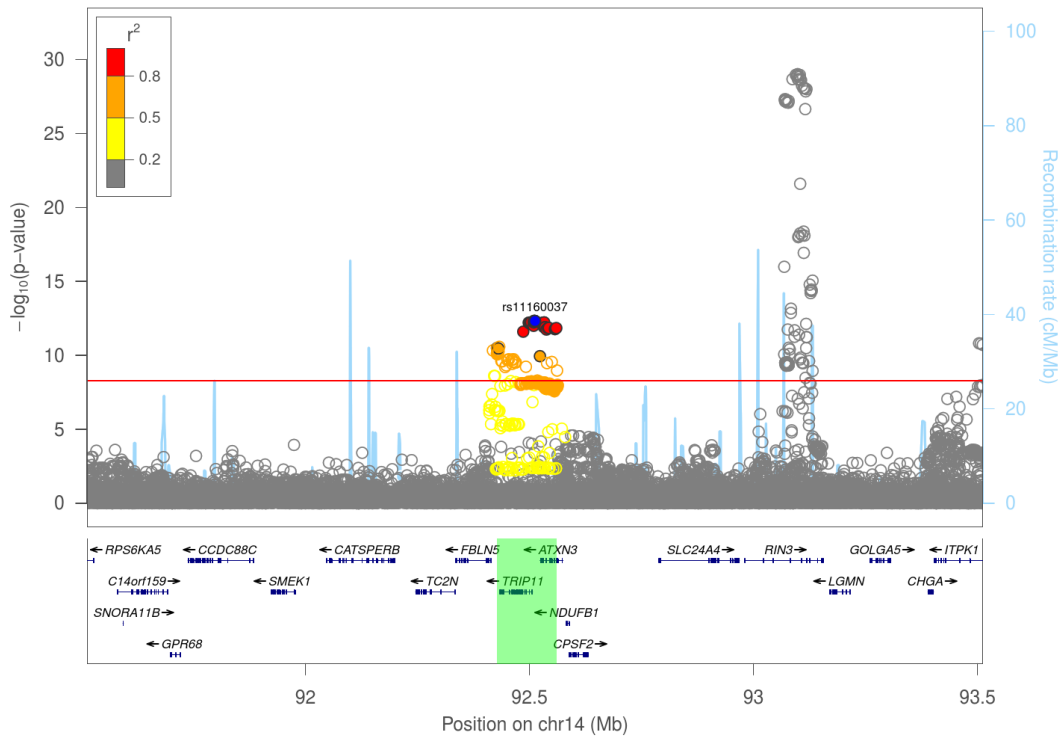

**RIN3, FVC previous signal rs72699866, new signal rs11621587**

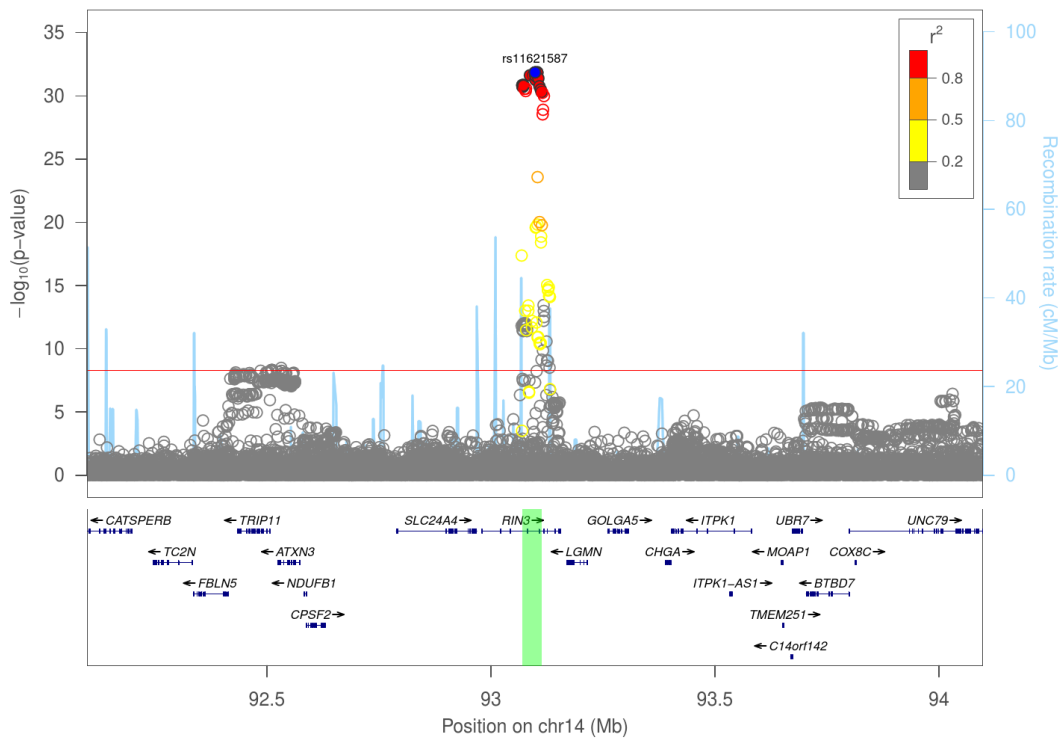

**RPAP1, FEV<sub>1</sub>/FVC previous signal rs1200345, new signal rs2012453**

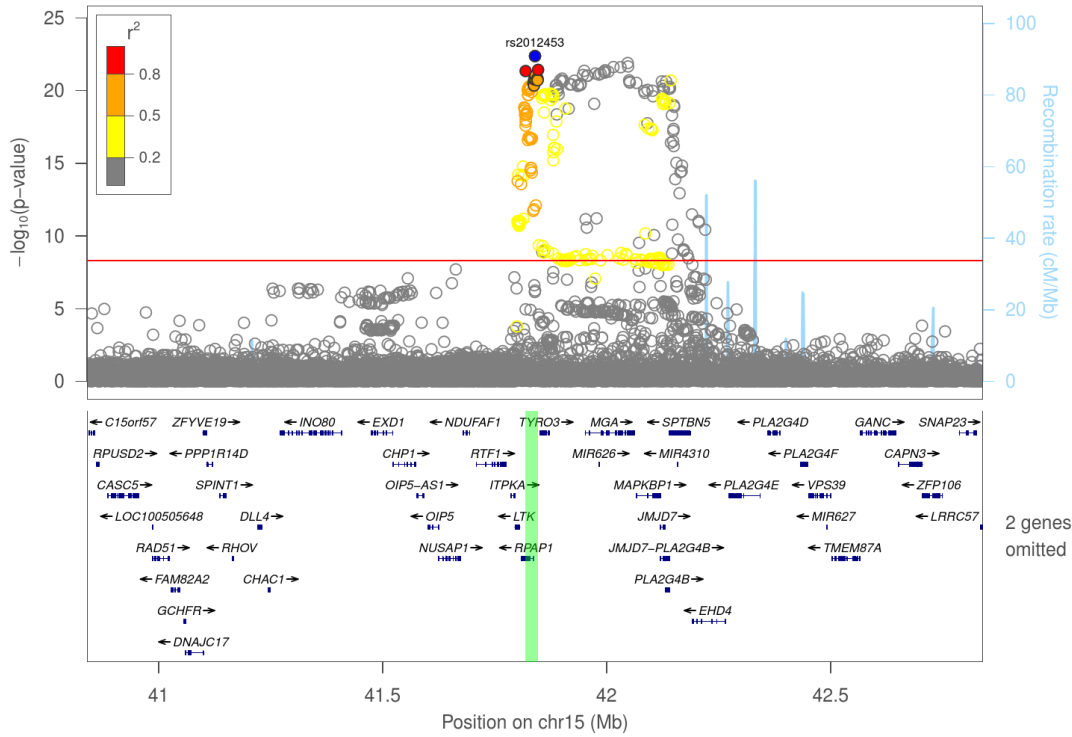

**MGA, FEV<sub>1</sub>/FVC previous signal rs72724130, new signal rs56383987**

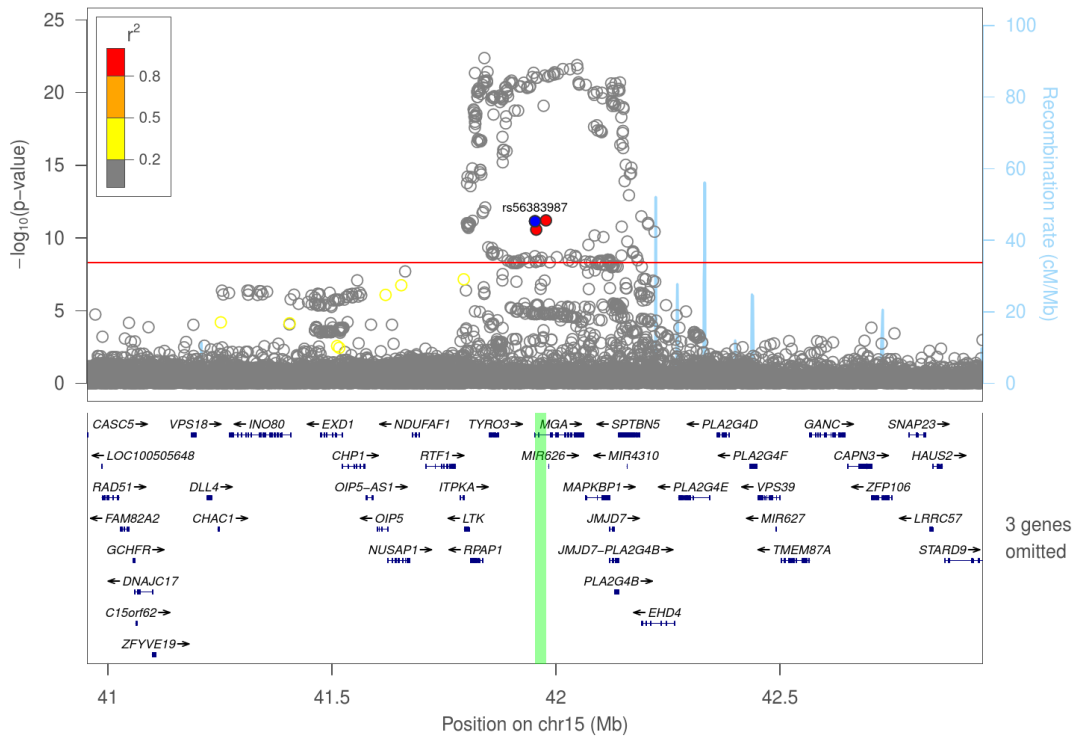

**AAGAB, FVC previous signal rs8025774, new signal rs12917612**

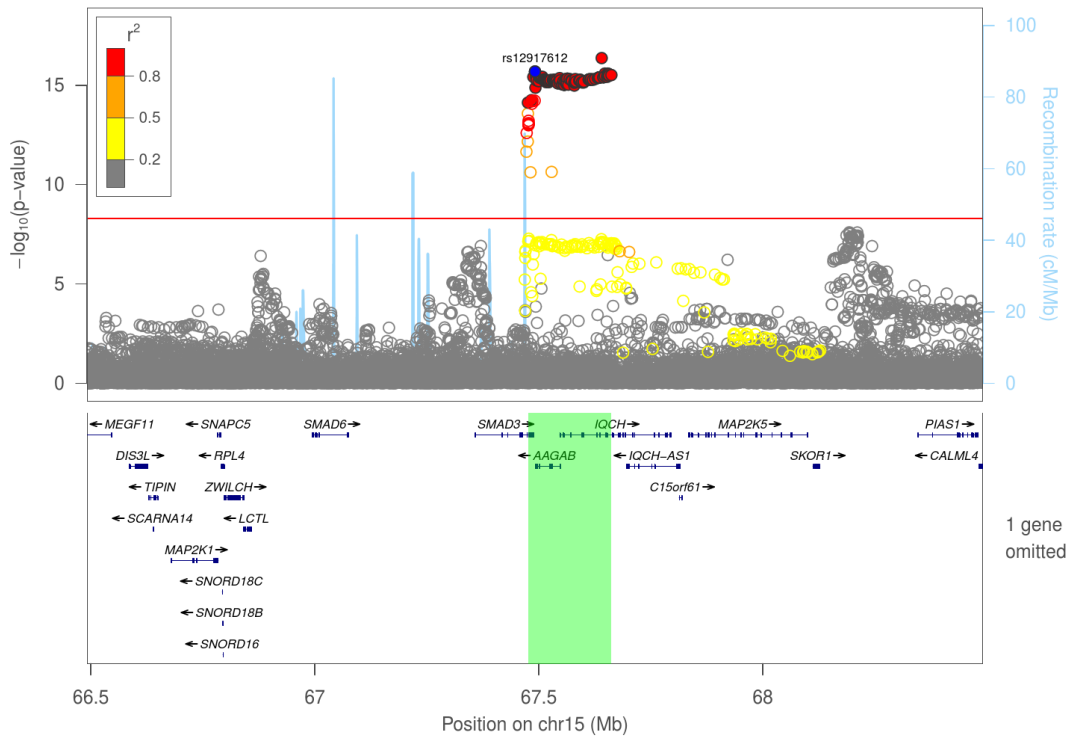

**THSD4, FEV<sub>1</sub>/FVC previous signal rs10851839, new signal rs1441358**

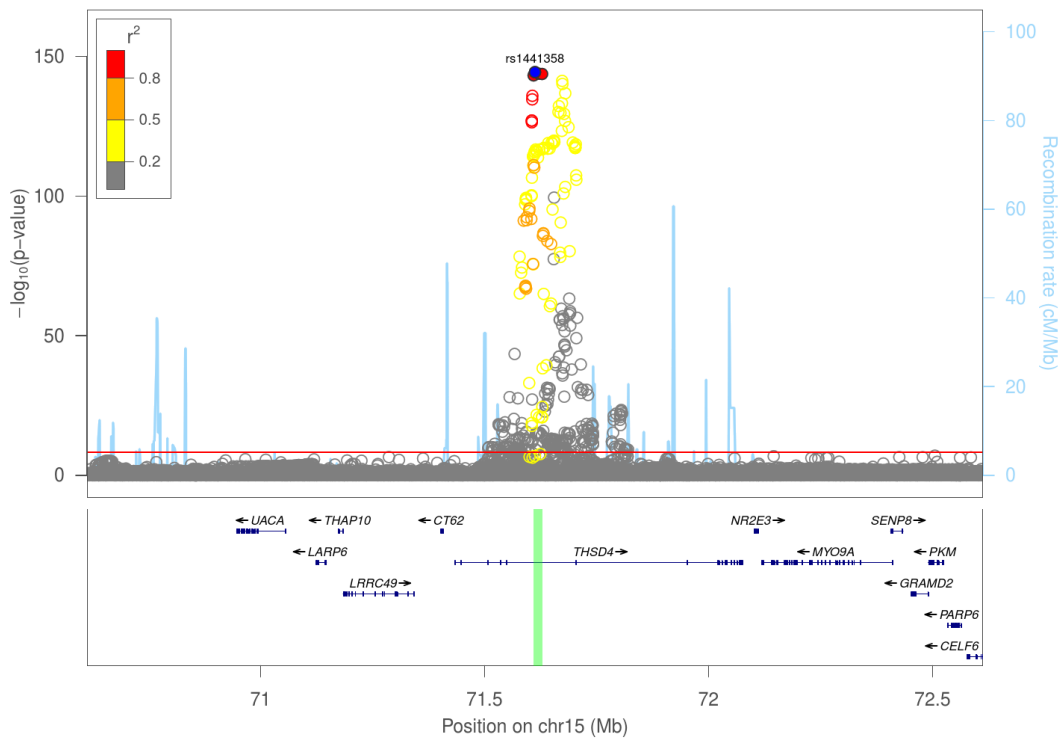

**THSD4, FEV<sub>1</sub> previous signal rs12591467, new signal rs62015883**

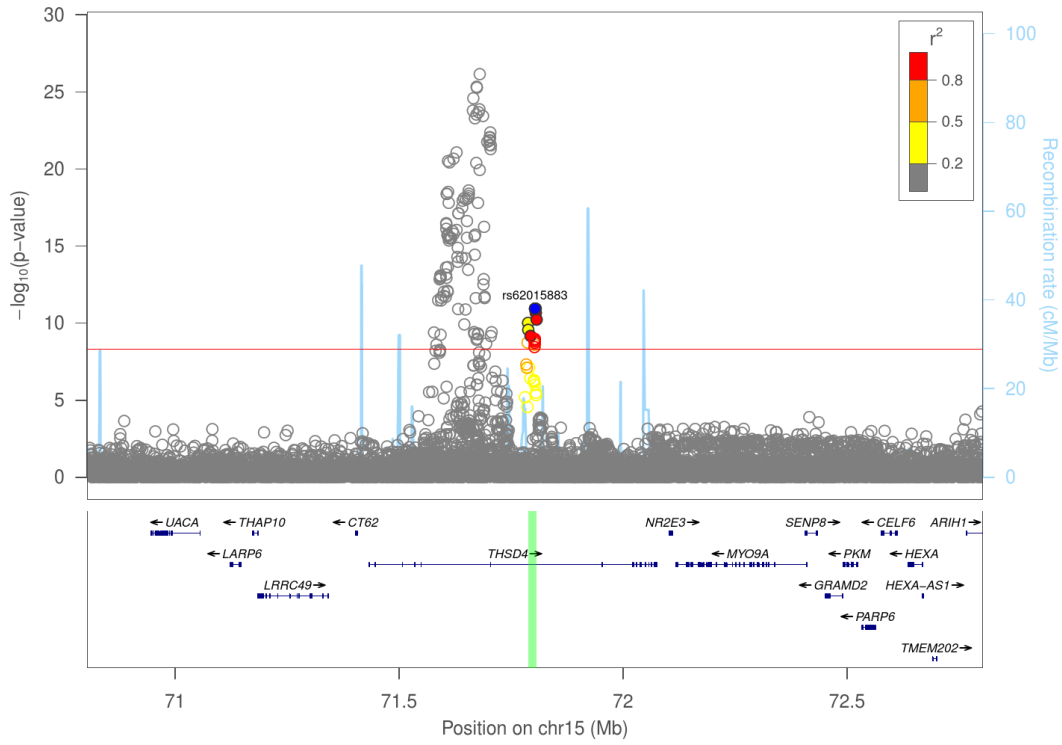

**SH3GL3, FEV<sub>1</sub>/FVC previous signal rs12438269, new signal rs1896797**

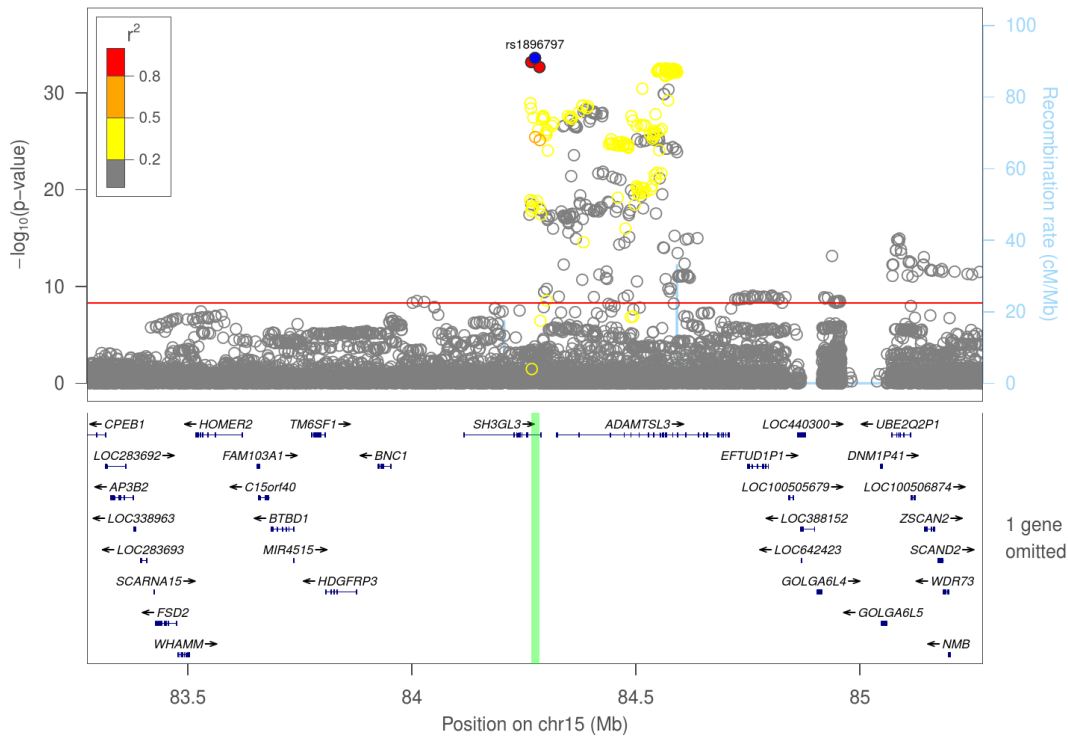

**TEKT5, FEV<sub>1</sub>/FVC previous signal rs12149593, new signal rs78442819**

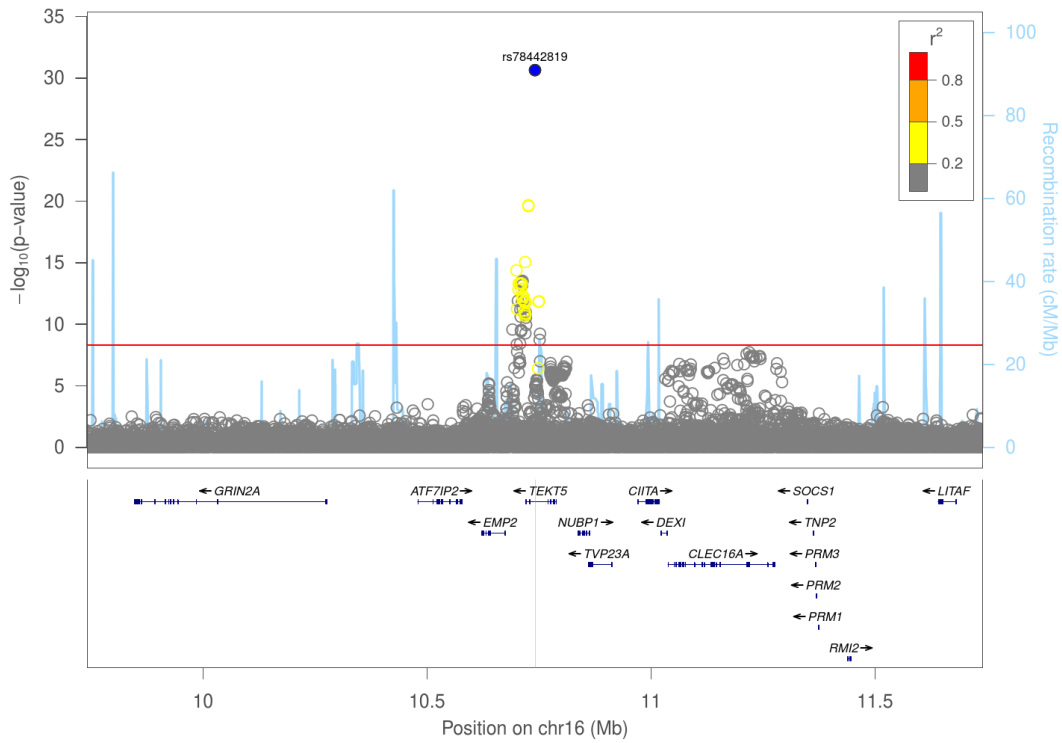

**IL27, FEV<sub>1</sub> previous signal rs181206, new signal rs12446589**

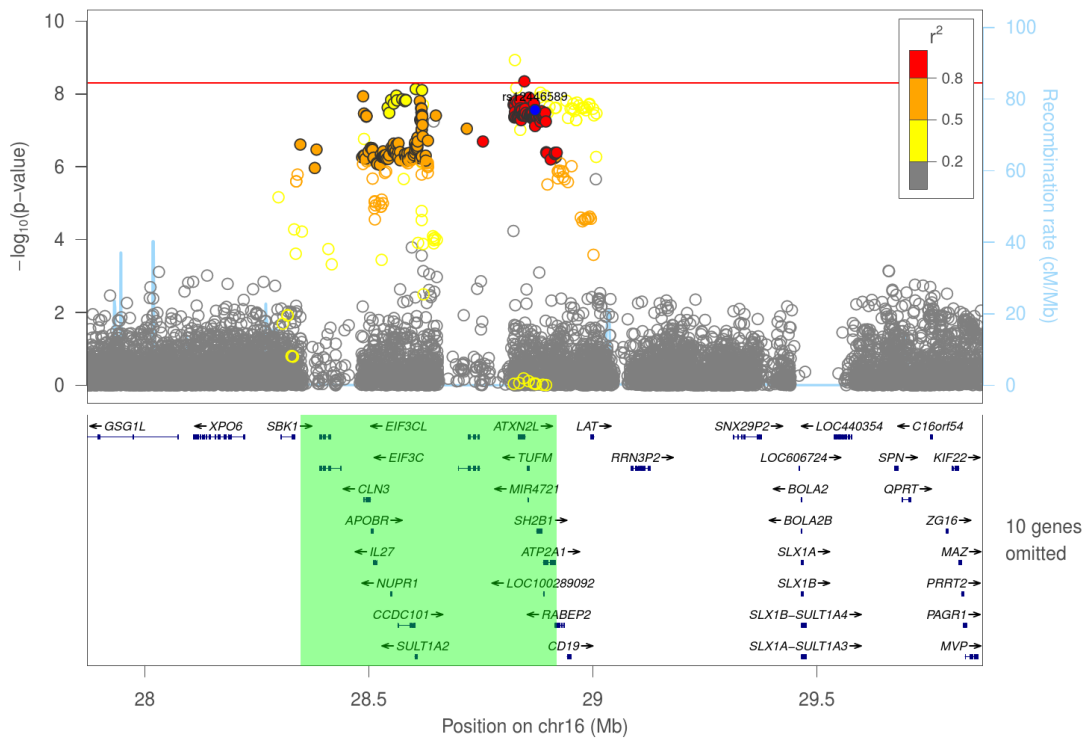



**MMP15, FEV<sub>1</sub>/FVC previous signal rs12447804, new signal rs11648508**

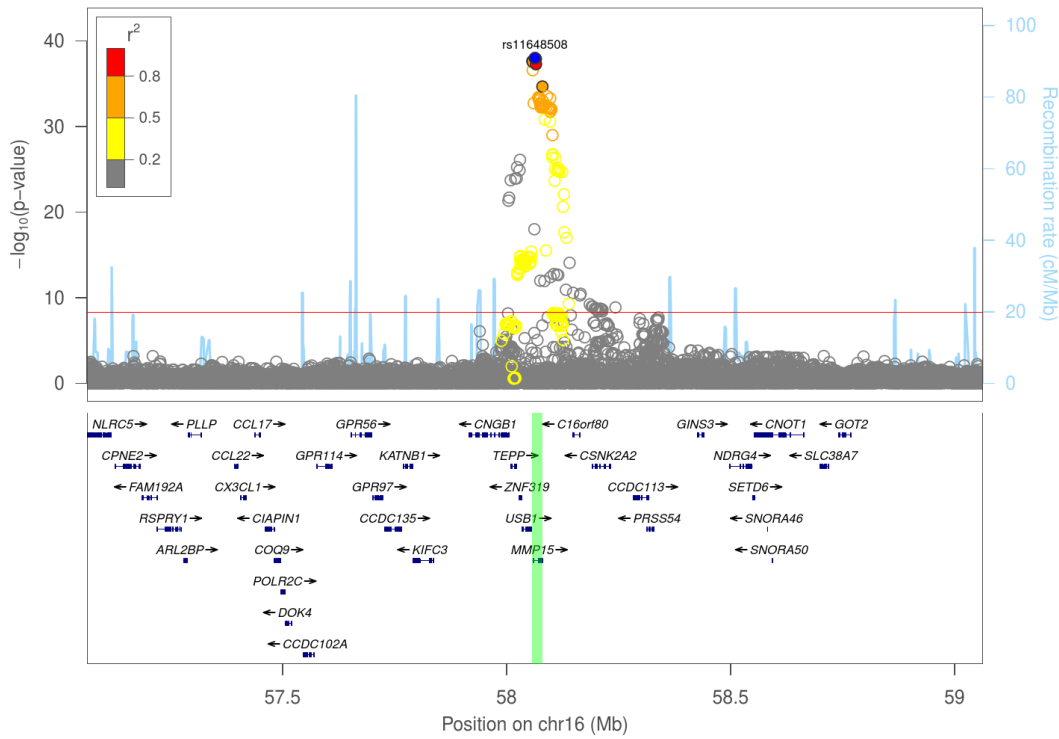

**WWP2, FEV<sub>1</sub> previous signal rs3973397, new signal rs8047194**

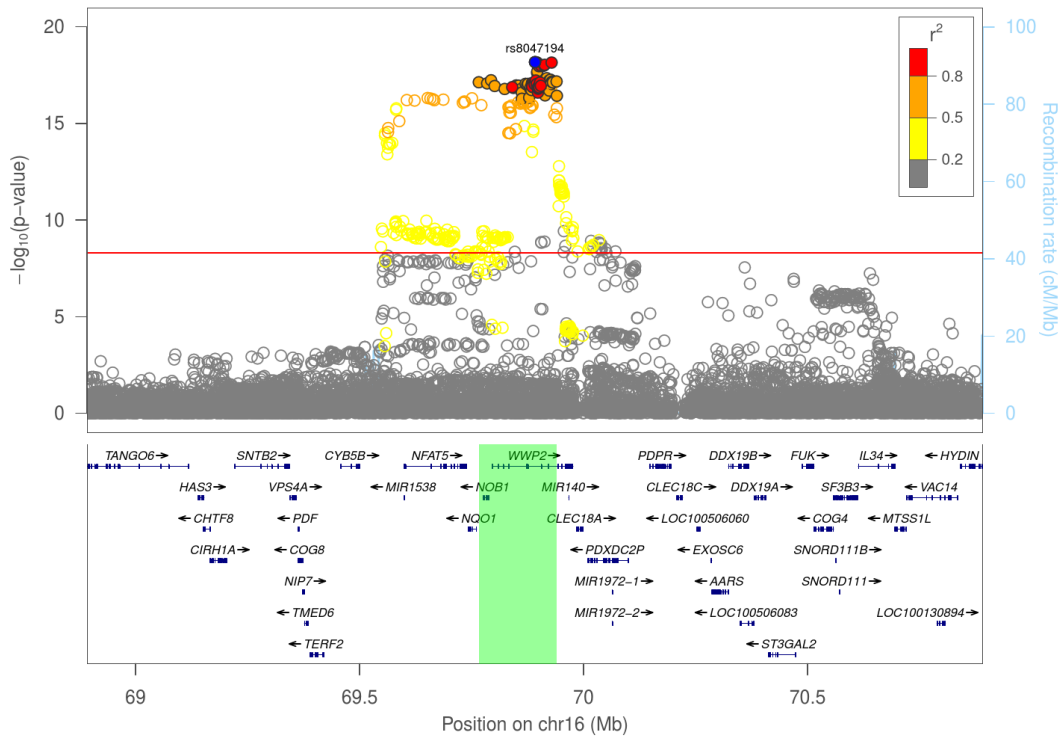

**CFDP1, FEV<sub>1</sub>/FVC previous signal rs3743609, new signal rs11858992**

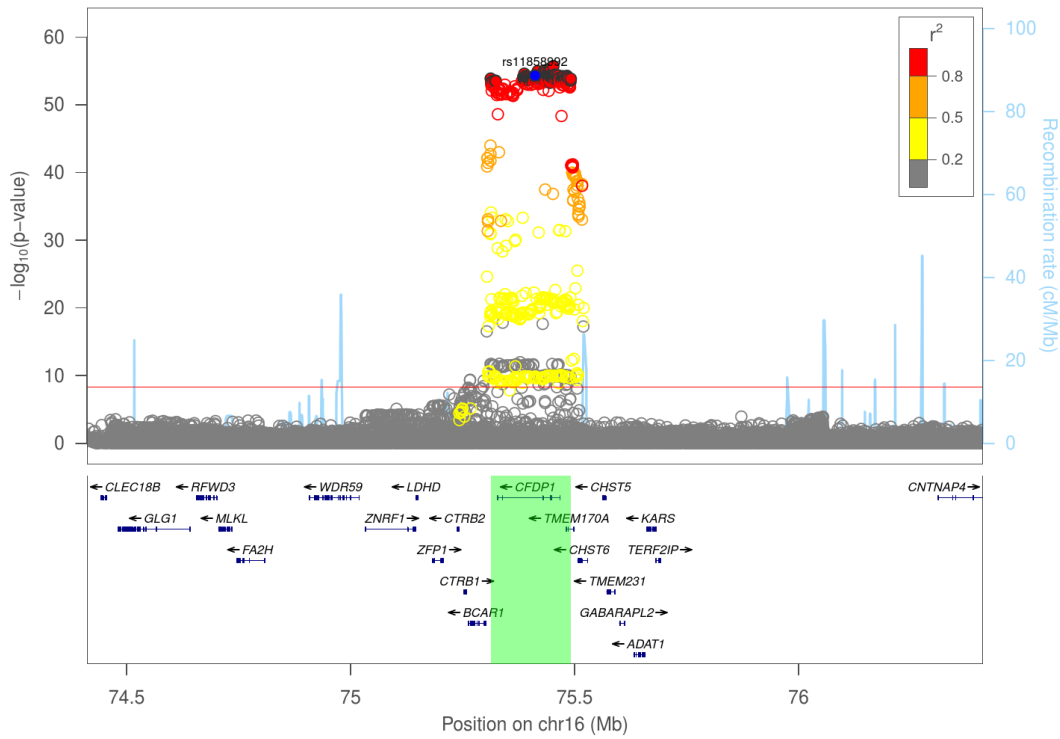

**WVOX, FEV<sub>1</sub> previous signal rs1079572, new signal rs2345443**

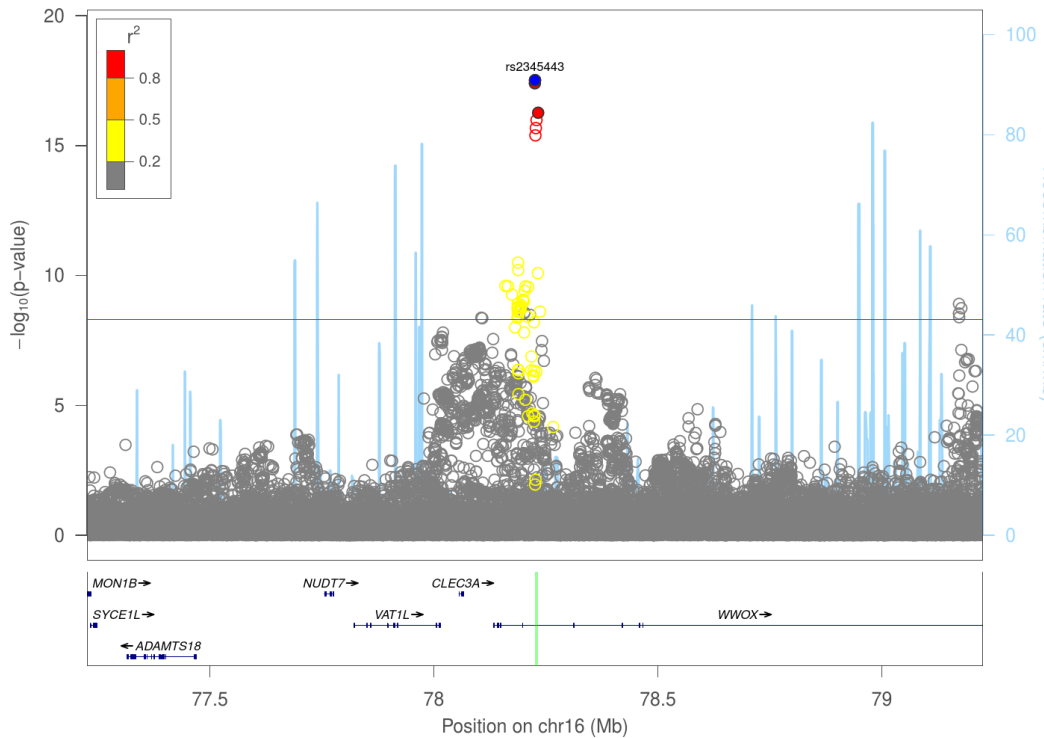

**SSH2, FEV<sub>1</sub>/FVC previous signal rs62070270, new signal rs2244592**

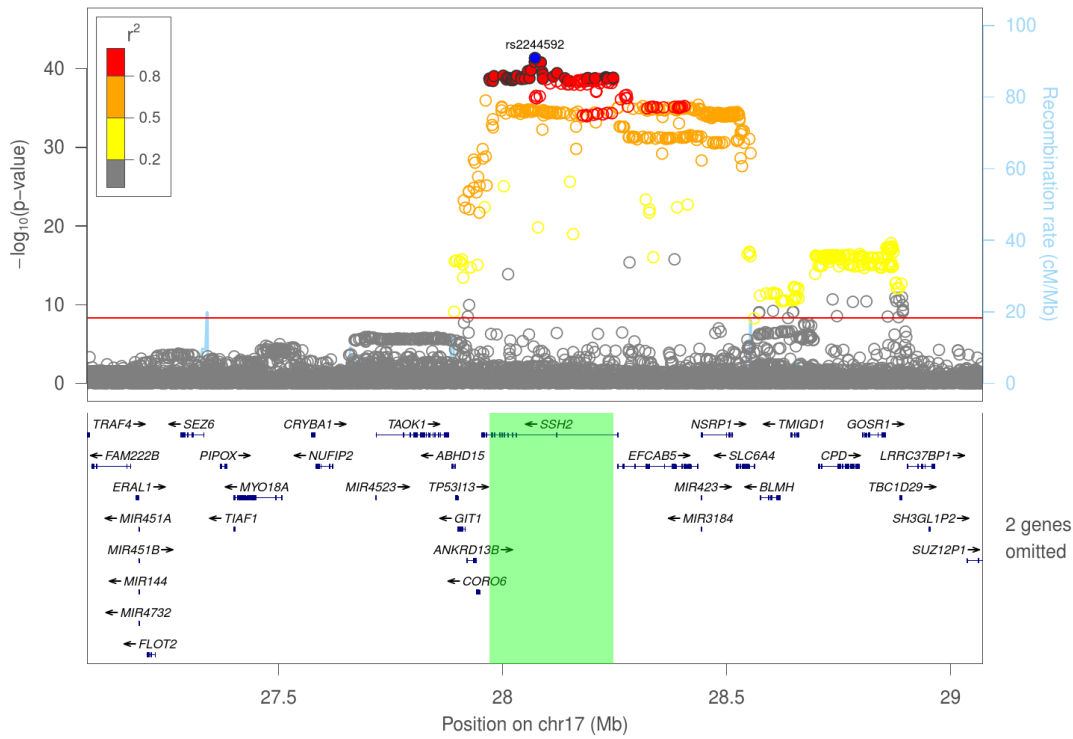

**SUZ12P1, FVC previous signal rs62070631, new signal rs62070648**

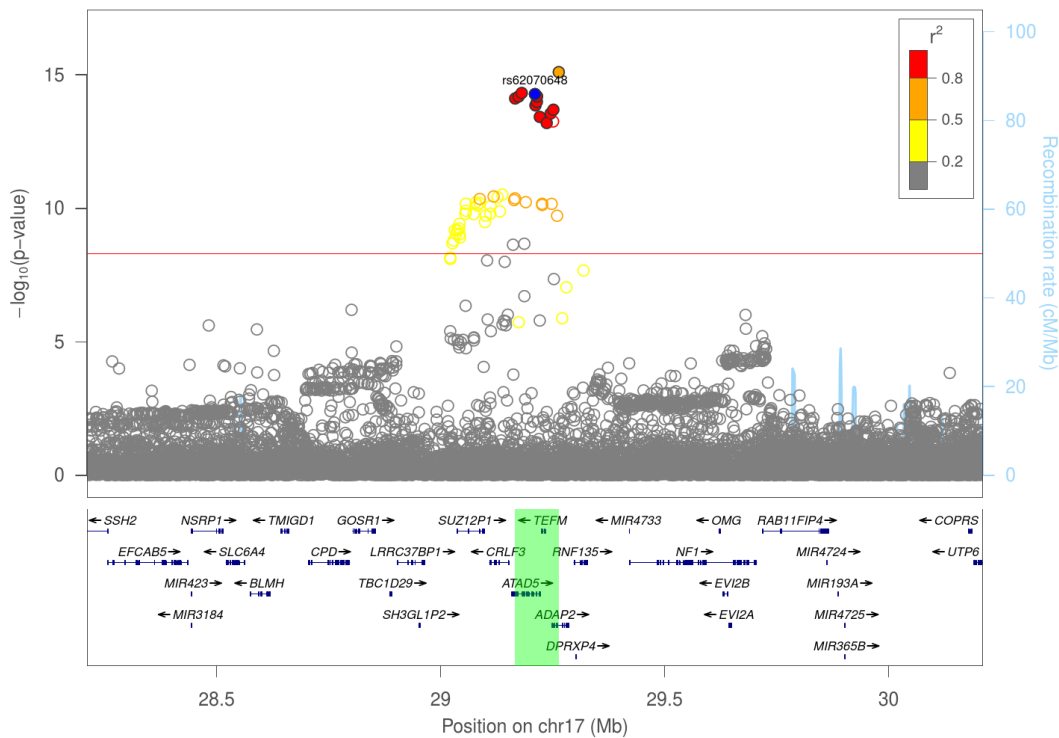

**PSMB3, FEV<sub>1</sub>/FVC previous signal rs11658500, new signal rs35246838**

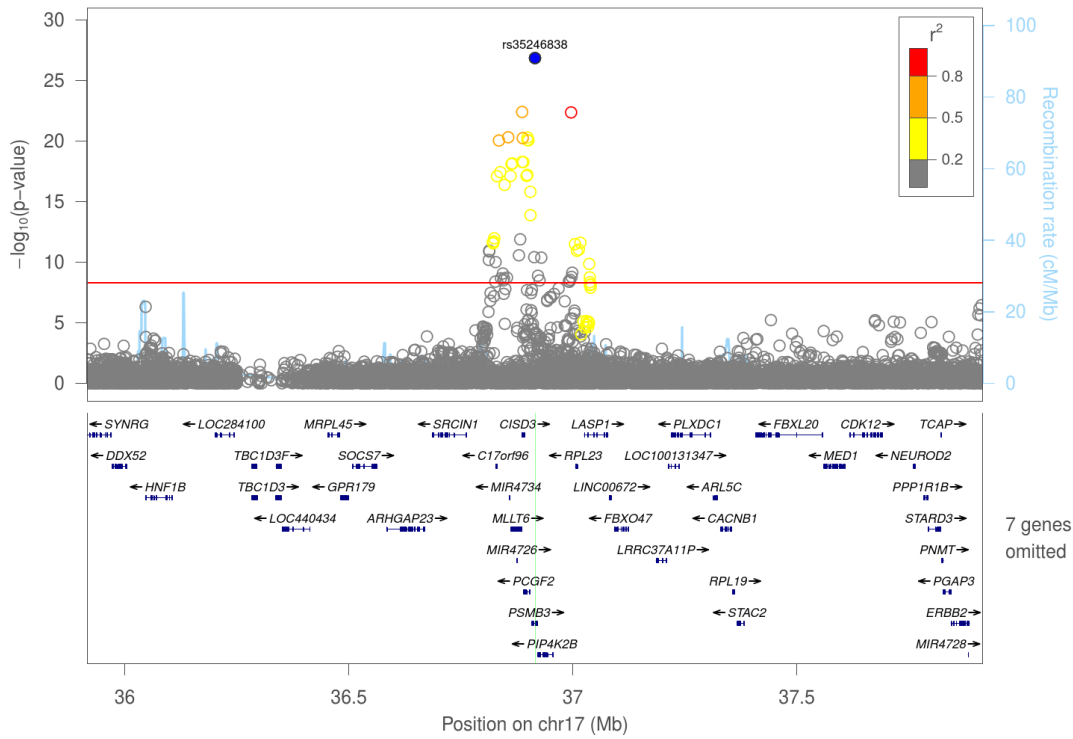

**FBXL20, FVC previous signal rs8067511, new signal rs8069451**

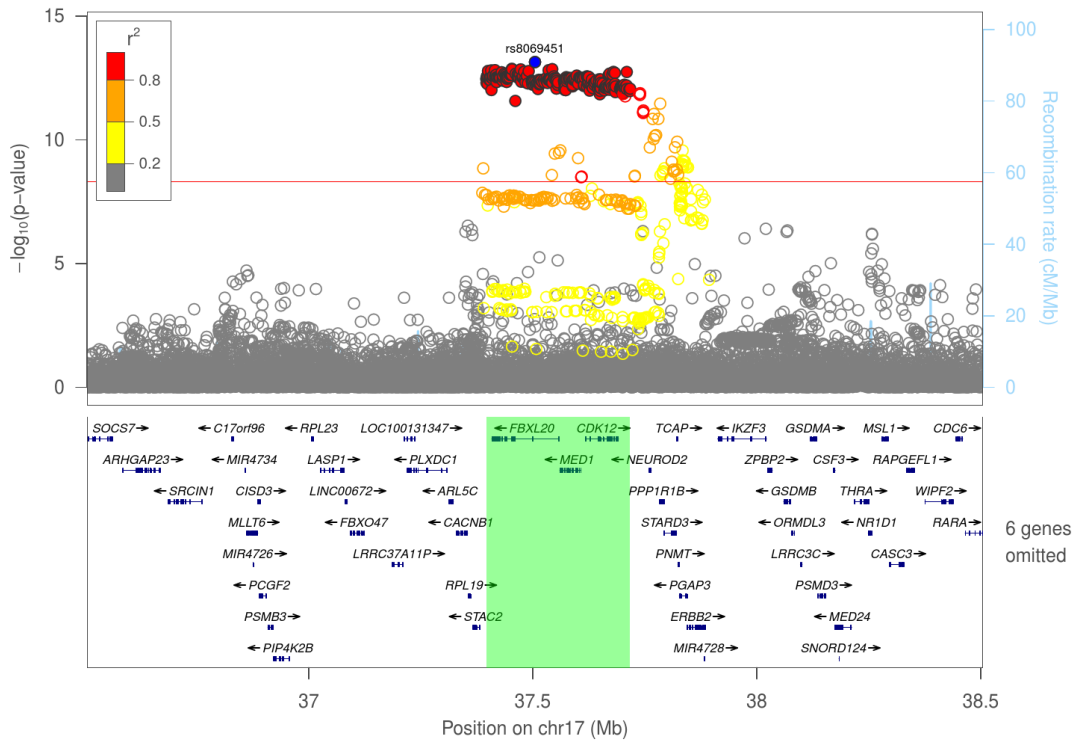

***MAPT-AS1*, *FEV*<sub>1</sub> previous signal rs17577877, new signal rs79412431**

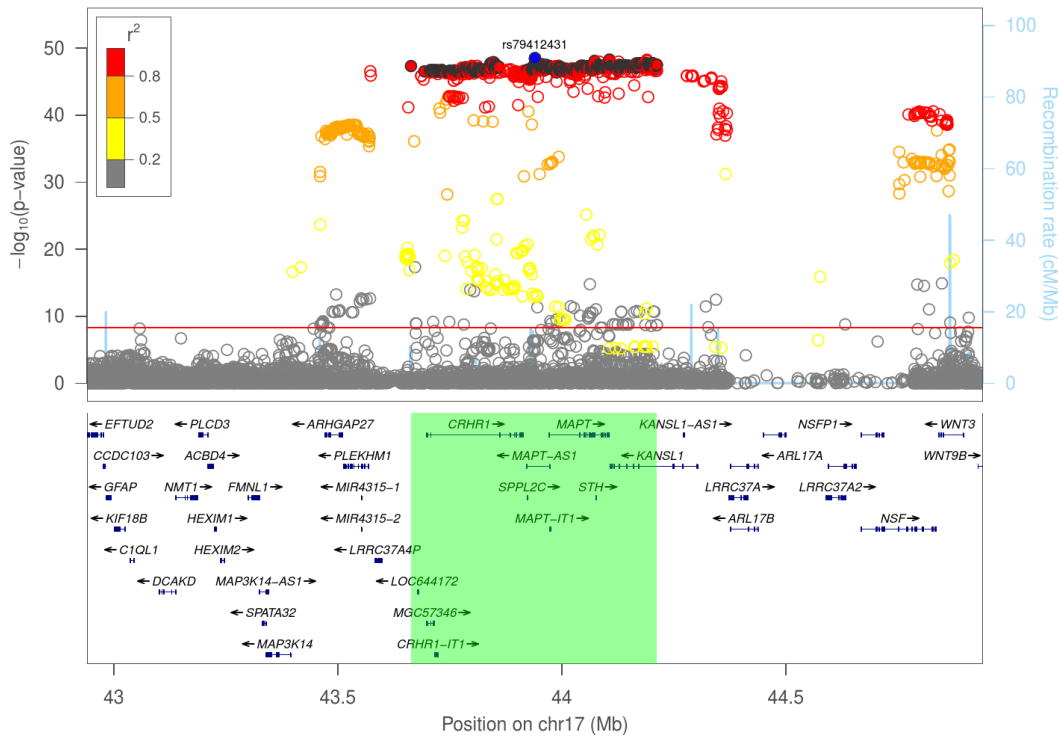

***CASC17*, *FVC* previous signal rs6501431, new signal rs6501431**

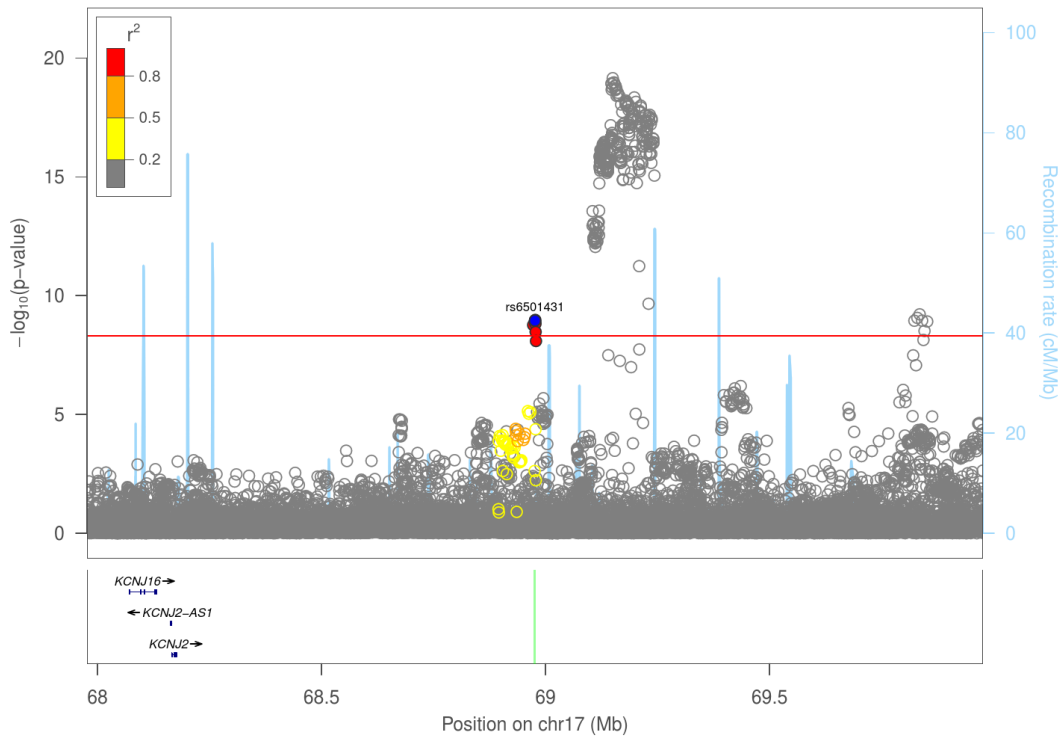

**CASC17, FEV<sub>1</sub> previous signal rs1859962, new signal rs6501455**

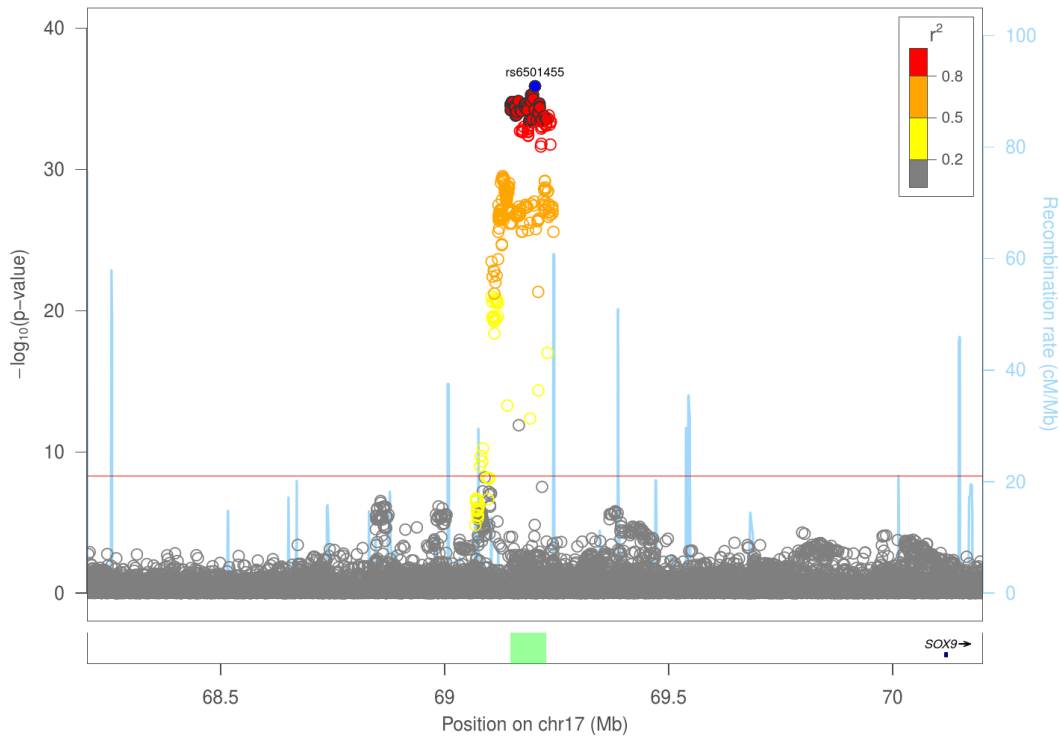

**TSEN54, FEV<sub>1</sub> previous signal rs7218675, new signal rs9892893**

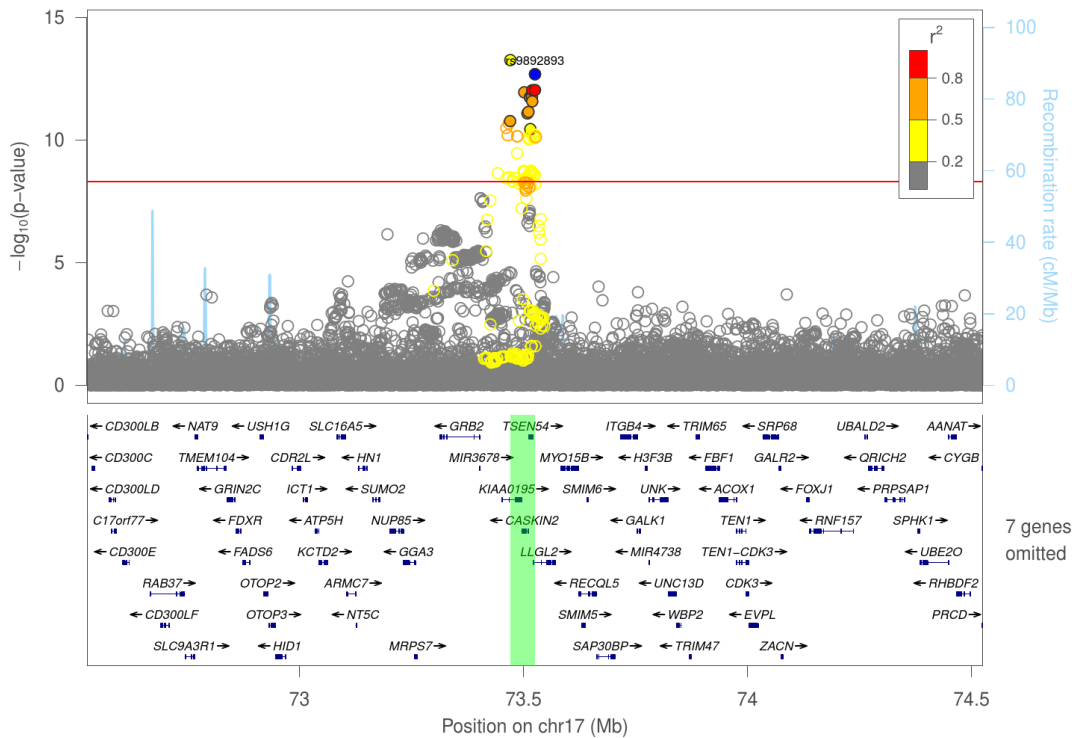

**MTCL1, FEV<sub>1</sub> previous signal rs633286, new signal rs513953**

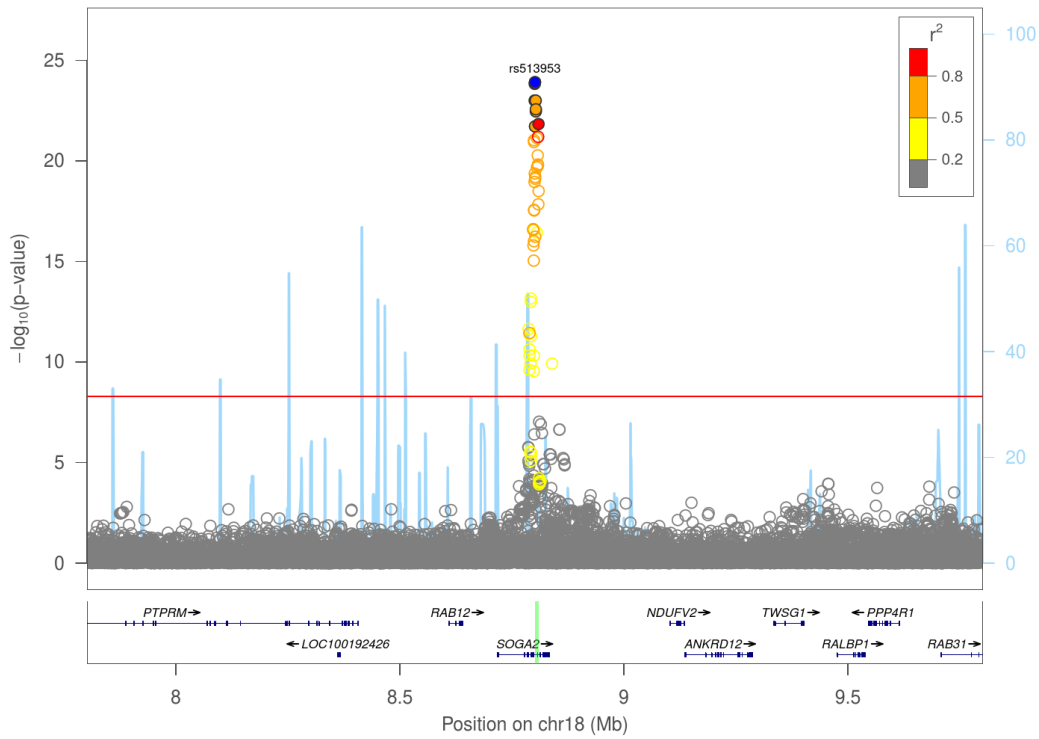

**CTAGE1/RBBP8, FEV<sub>1</sub> previous signal rs7243351, new signal rs11082051**

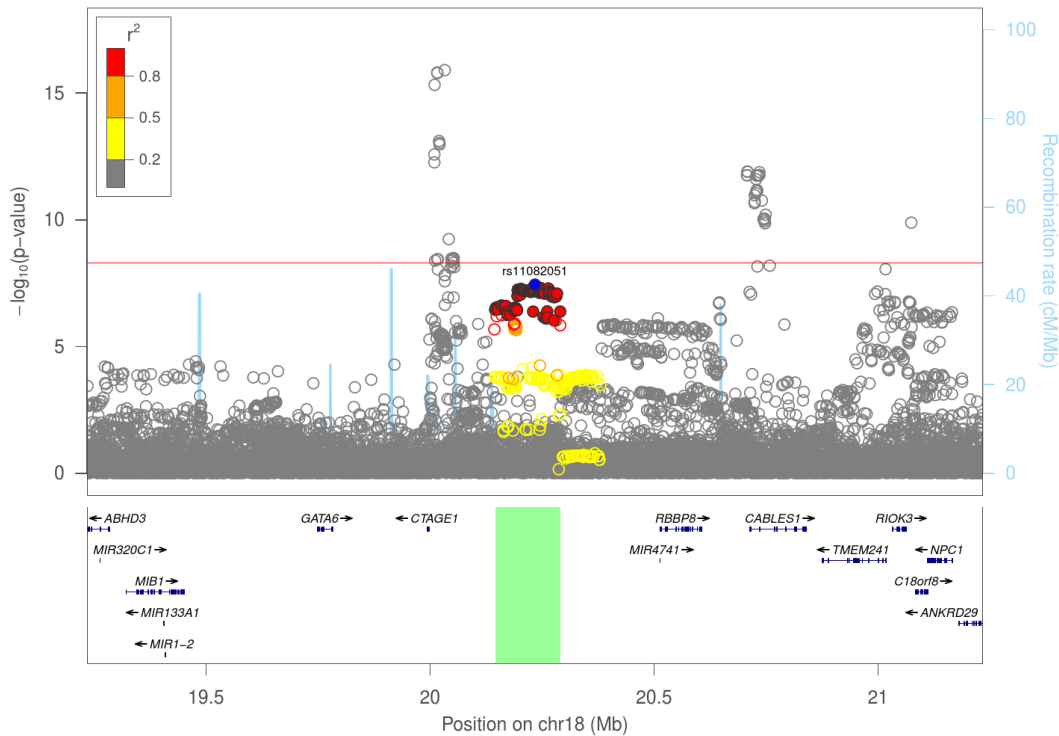

**CABLES1, FEV<sub>1</sub> previous signal rs7238093, new signal rs9947743**

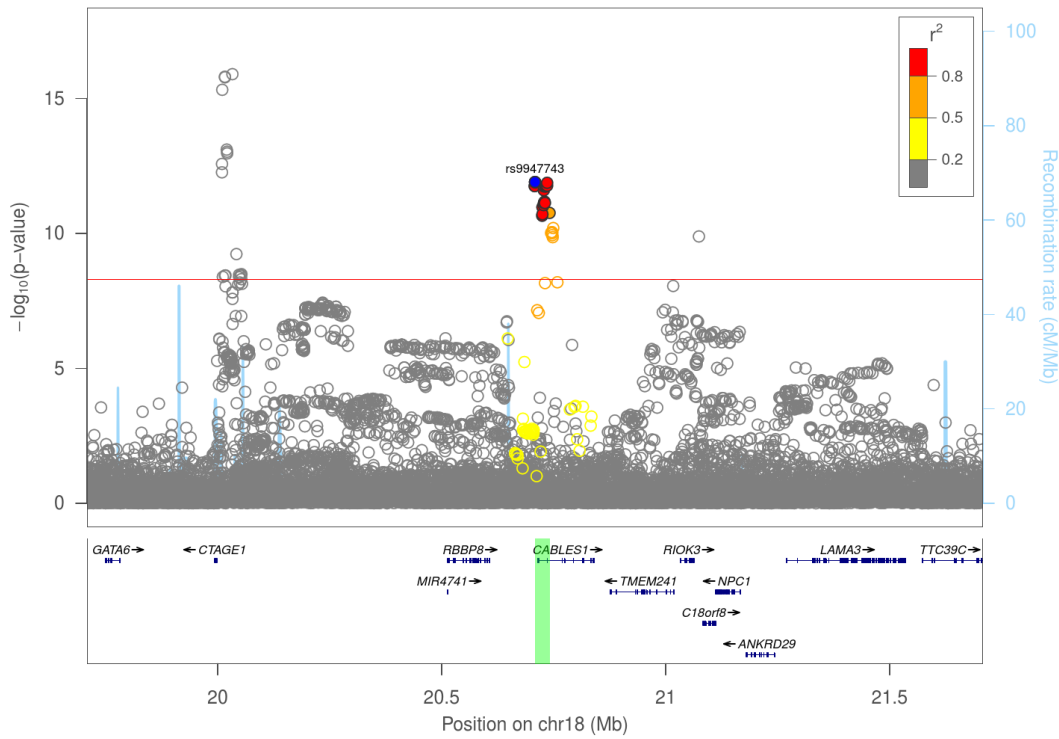

**DCC, FVC previous signal rs8089865, new signal rs12607758**

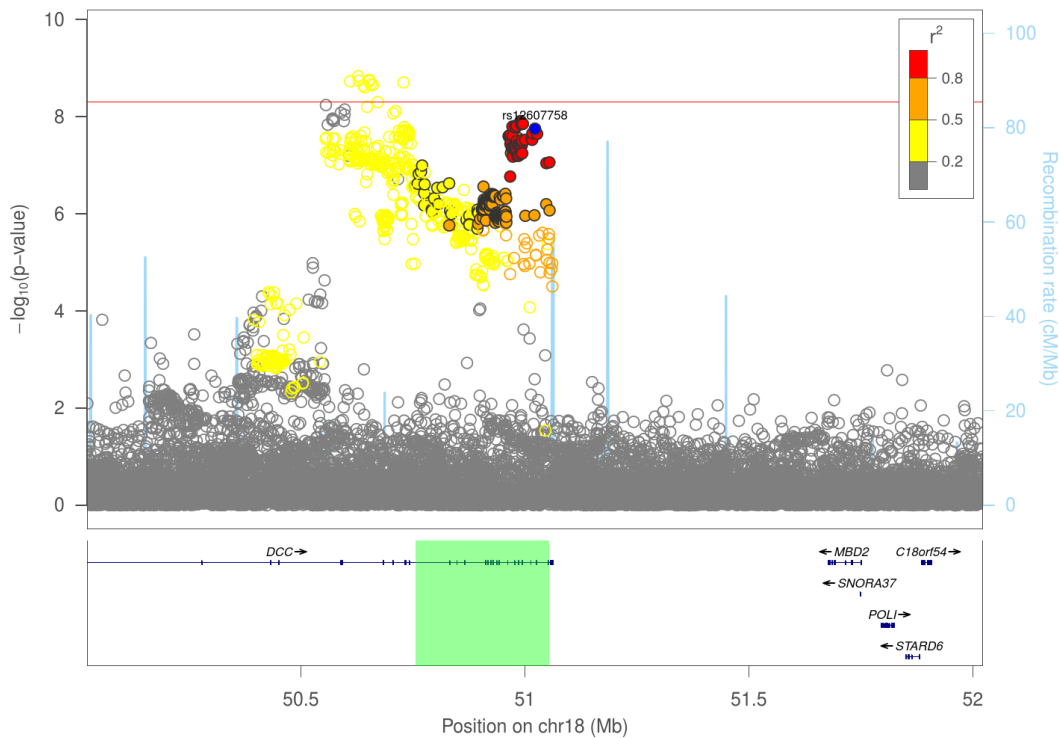



**TSHZ3, FEV<sub>1</sub>/FVC previous signal rs9636166, new signal rs9636166**

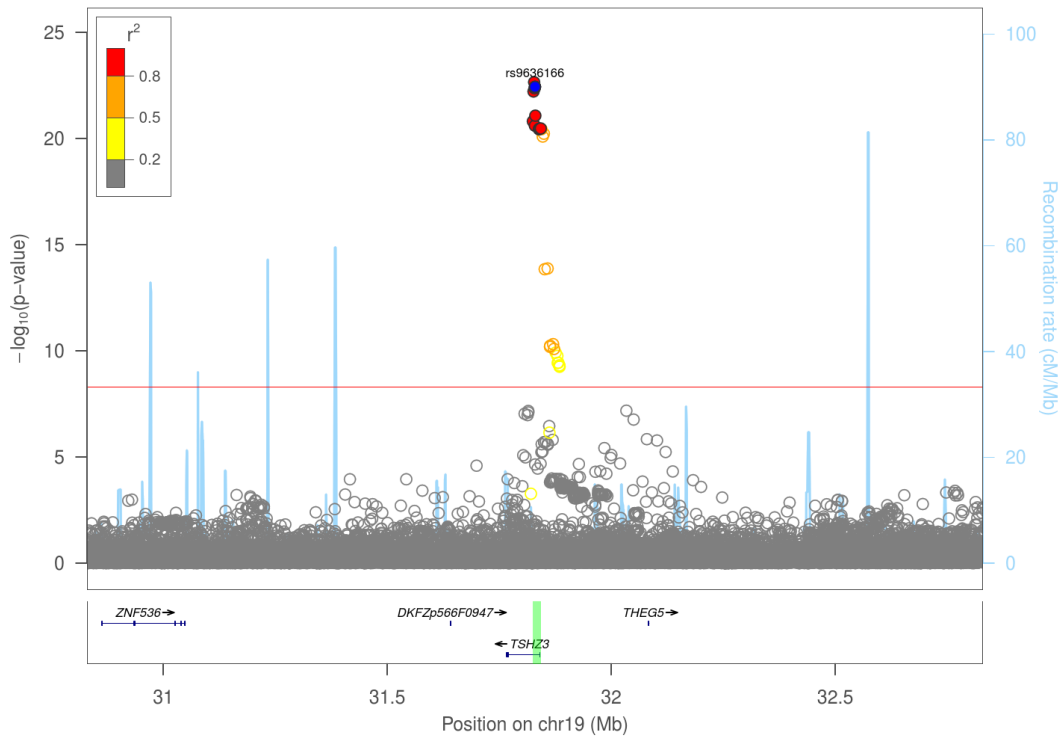

**LTBP4, FEV<sub>1</sub>/FVC previous signal rs113473882, new signal rs34093919**

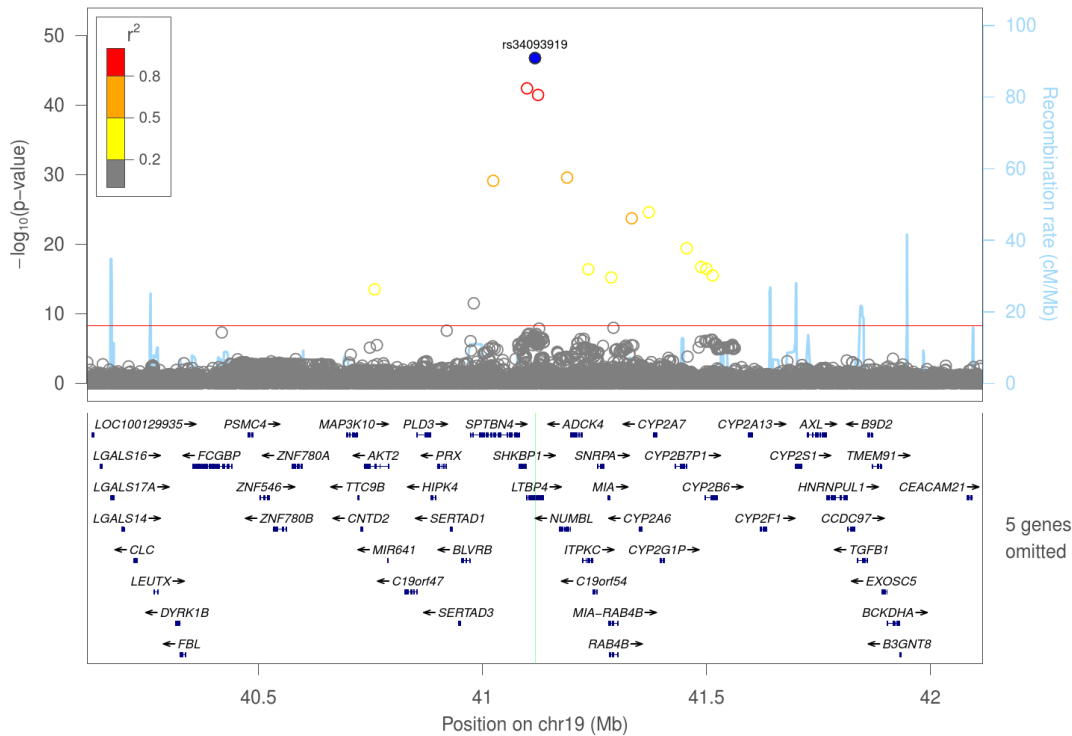

**BMP2, FVC** previous signal rs6140050, new signal rs2145272

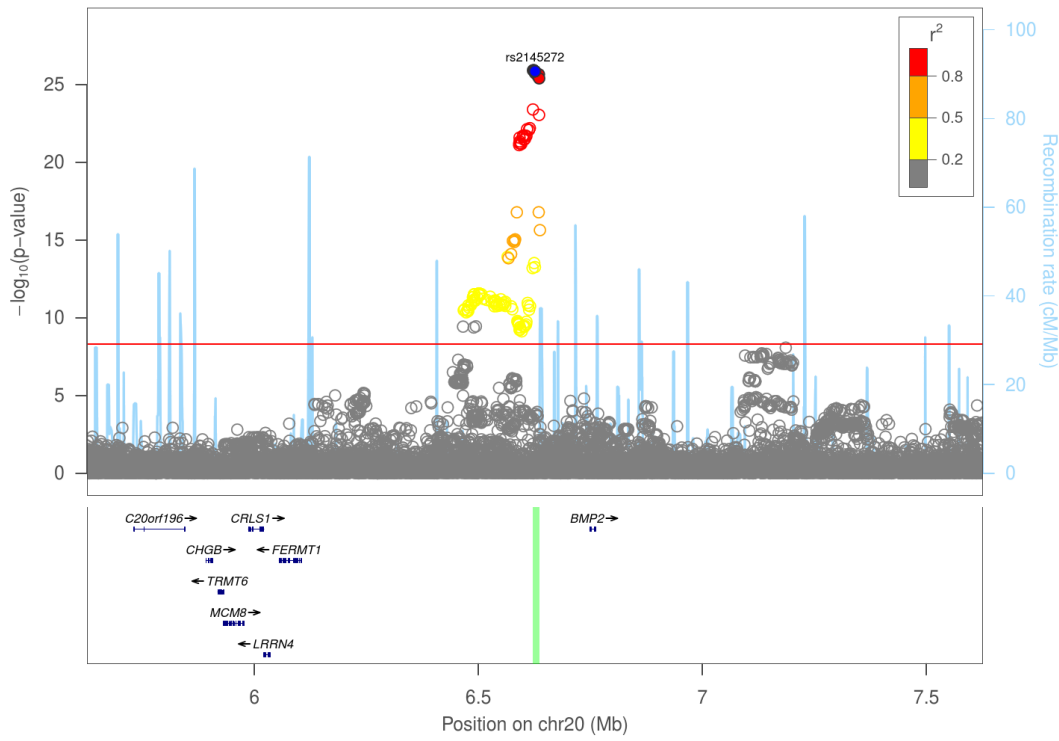

**ABHD12, FEV<sub>1</sub>** previous signal rs6138639, new signal rs2236180

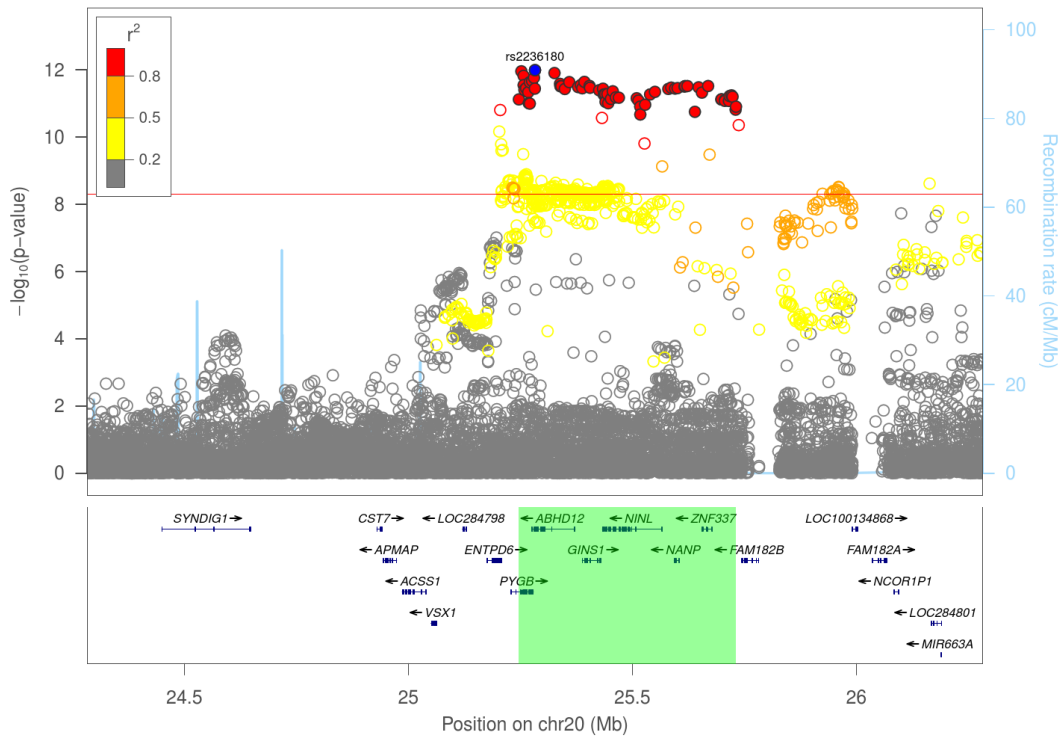

**C20orf112, FEV<sub>1</sub>/FVC previous signal rs1737889, new signal rs4413223**

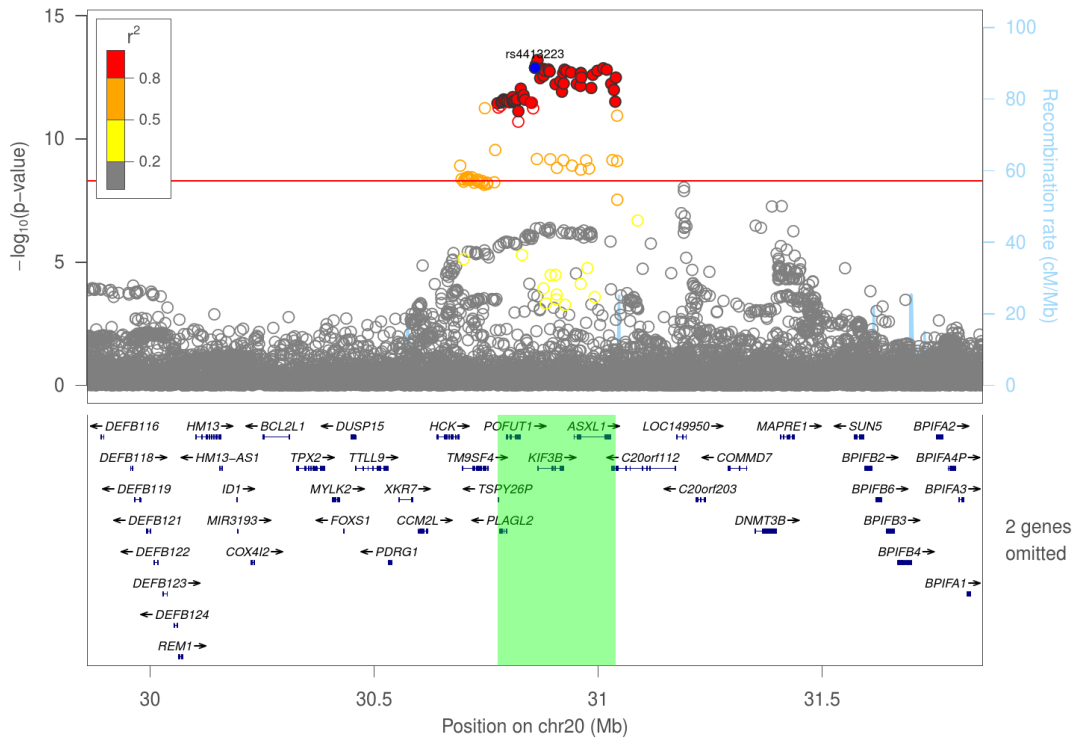

**UQCC1, FVC previous signal rs6088813, new signal rs143384**

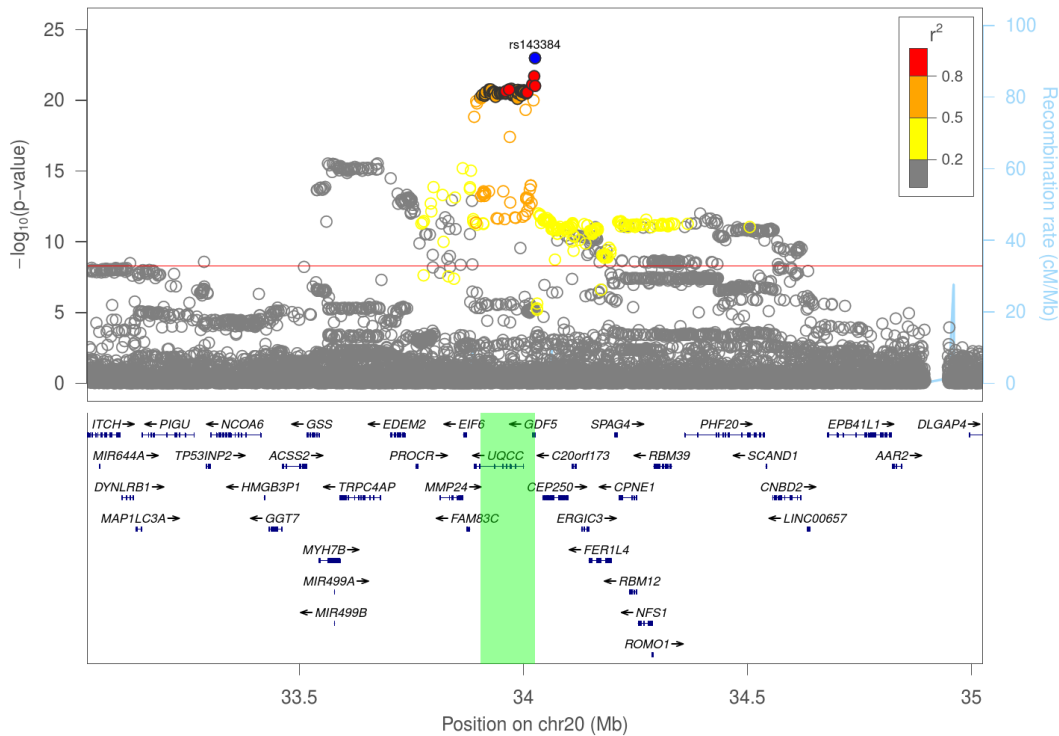

**EYA2, FVC previous signal rs2236519, new signal rs12481092**

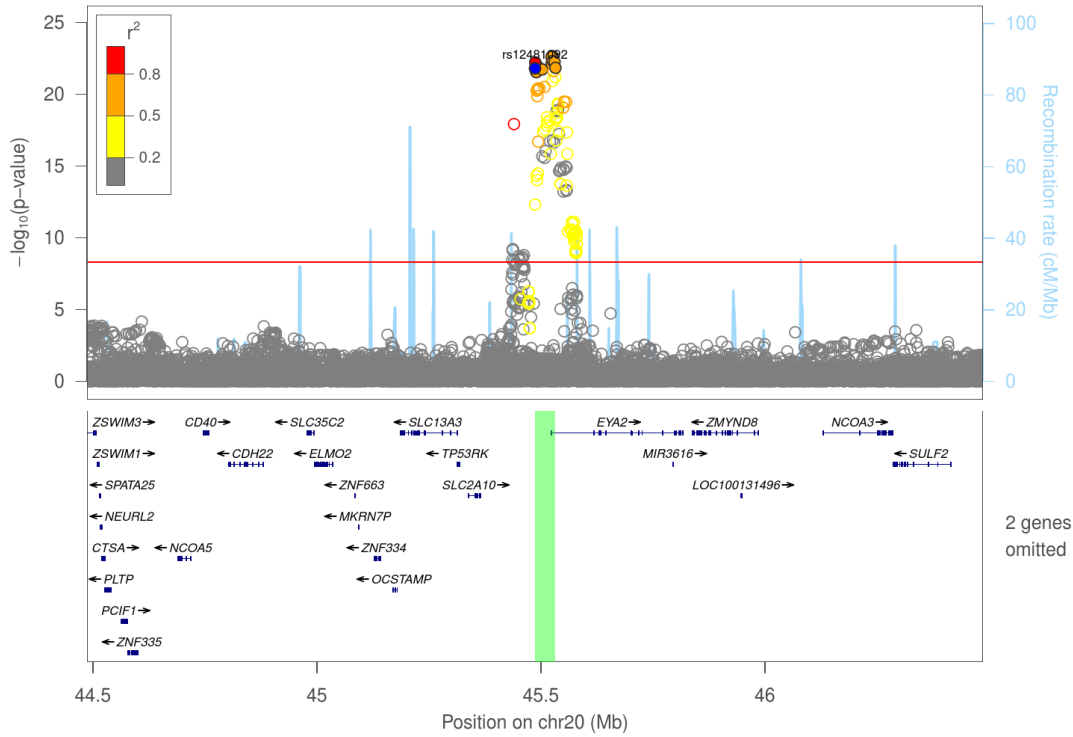

**SLC2A4RG, FVC previous signal rs6062304, new signal rs4809221**

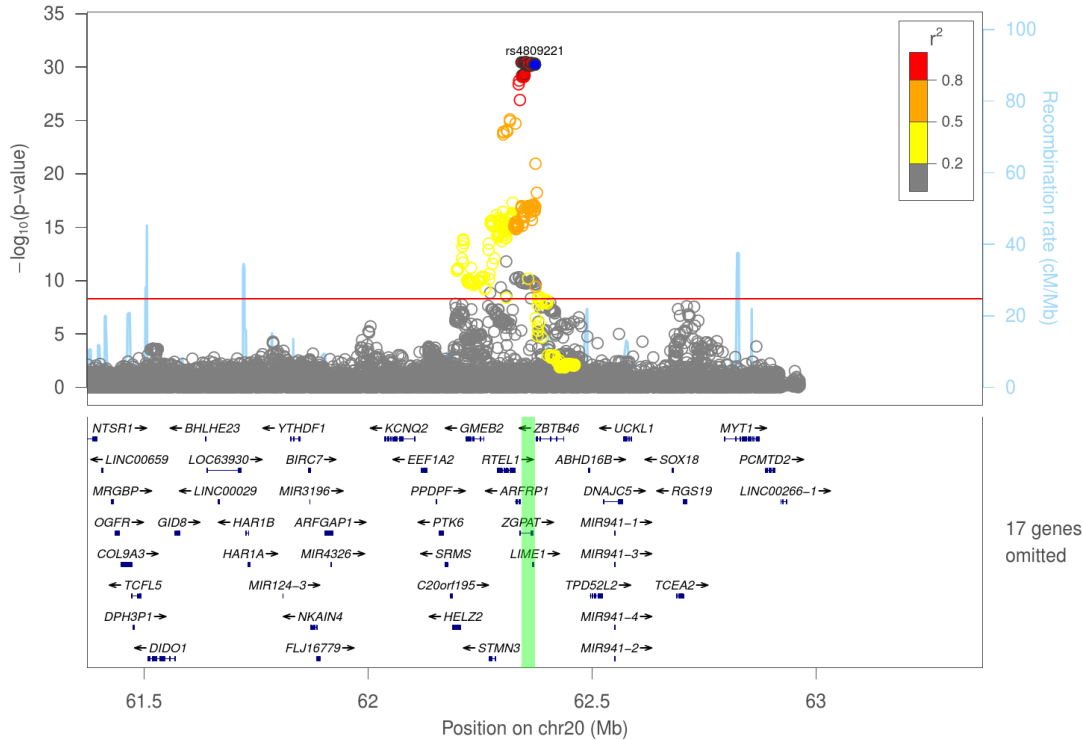

**KCNE2, FEV<sub>1</sub>/FVC previous signal rs2834440, new signal rs62213732**

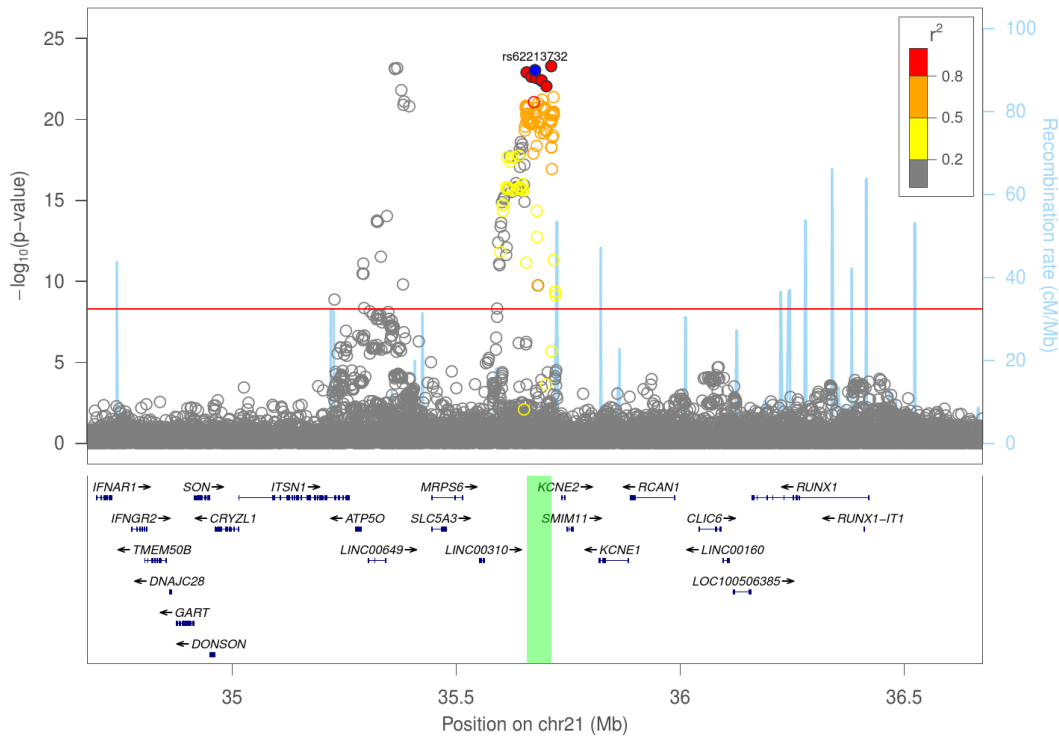

**MICAL3, FEV<sub>1</sub> previous signal rs11704827, new signal rs1978968**

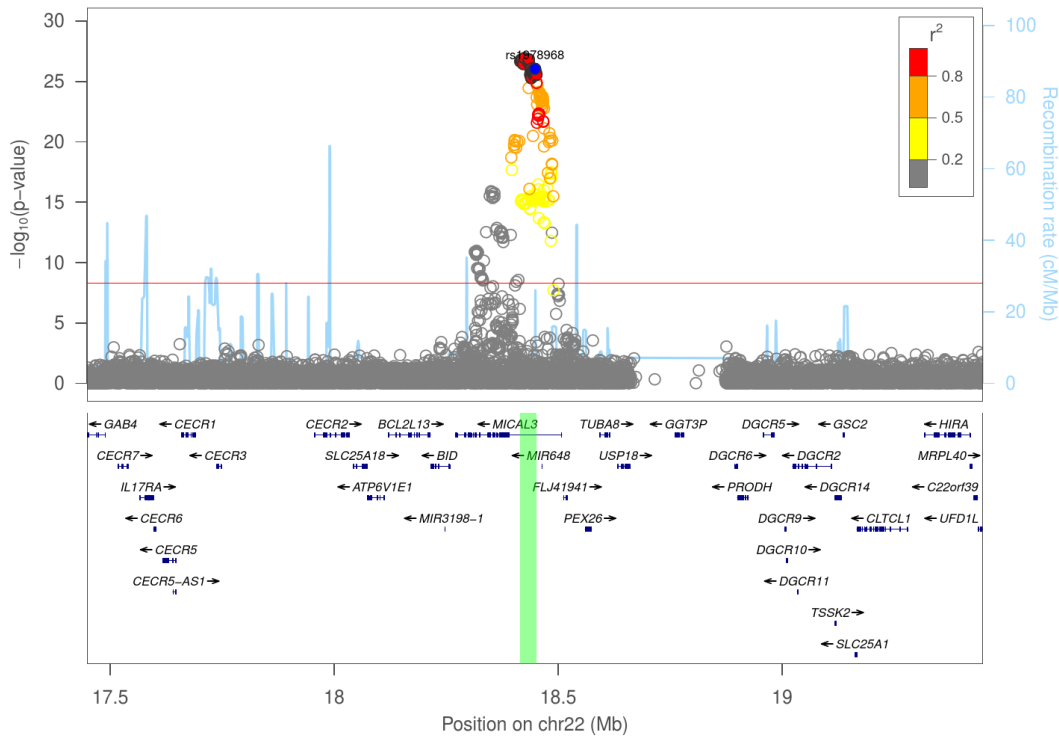

**SCARF2, FEV<sub>1</sub> previous signal rs4820216, new signal rs9610955**

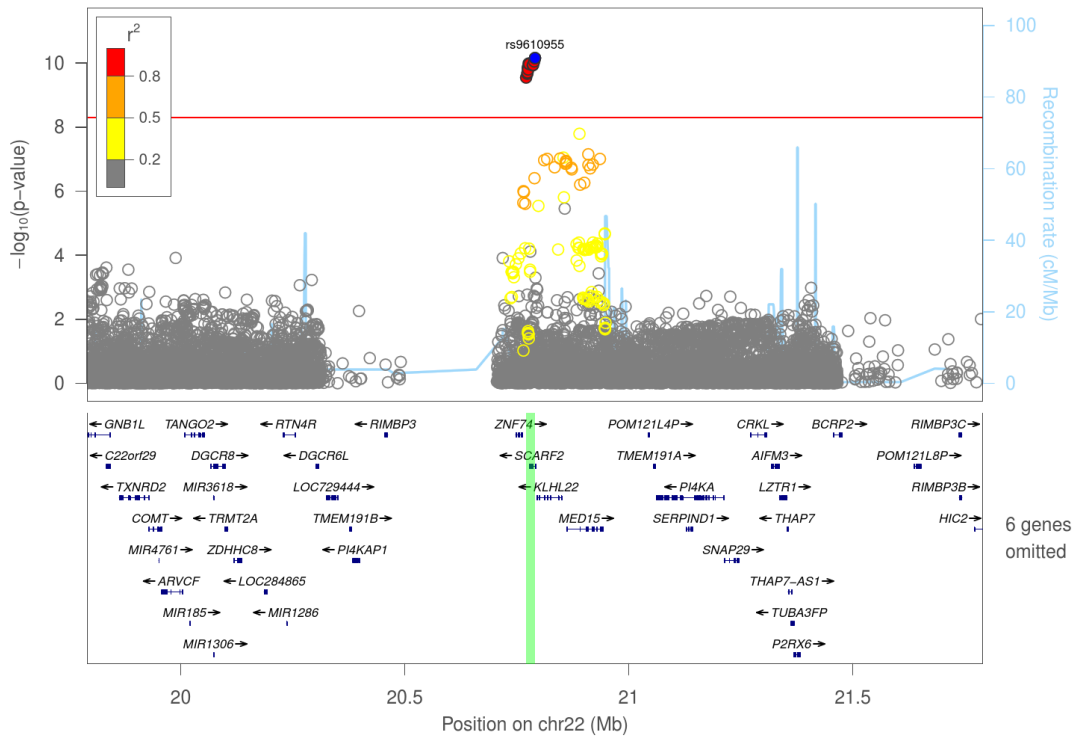

**MN1, FEV<sub>1</sub>/FVC previous signal rs2283847, new signal rs2283847**

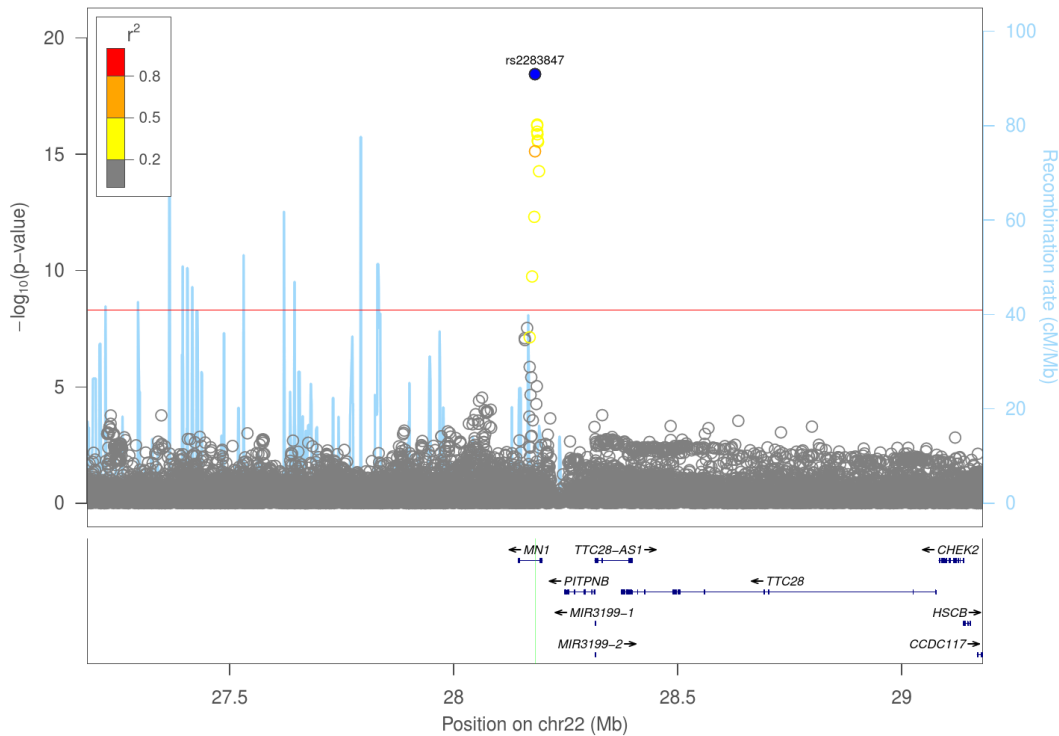

Supplement: NIHMS1514965-supplement-4.pdf [file NIHMS1514965-supplement-4.pdf]
